# Supplementary material for: Genome-wide identification and analysis of long noncoding RNAs in longissimus muscle tissue from Kazakh cattle and Xinjiang brown cattle
Source: PubMed Central journal article supplement (PMC8563250; doi:10.5713/ajas.20.0317), 2020-10-13
Supplement: ajas-20-0317-suppl.pdf [file ajas-20-0317-suppl.pdf]

Table S1. Differentially expressed lncRNAs.

| #ID             | K_FPK | H_FPK | Pvalue   | log2FC | gulate | sequence                                                                                                                                                                                                                                                                                                                                                                                                                                                                                                                                                                                                                                                                                                                                                                                                                                                                                                                                                                                                                                                    |
|-----------------|-------|-------|----------|--------|--------|-------------------------------------------------------------------------------------------------------------------------------------------------------------------------------------------------------------------------------------------------------------------------------------------------------------------------------------------------------------------------------------------------------------------------------------------------------------------------------------------------------------------------------------------------------------------------------------------------------------------------------------------------------------------------------------------------------------------------------------------------------------------------------------------------------------------------------------------------------------------------------------------------------------------------------------------------------------------------------------------------------------------------------------------------------------|
| MSTRG.200128.7  | 0     | 0.29  | 1.11E-10 | 11.93  | up     | CGGCTTTGGCTCGCGCCCCGCCCGCGCGCGTGGCCGTTTGAAGTACTAATTTCTGTCATATGACTGAGGCCTATGGGGTGGCGGGCAGCTCTAGGAGCGGGGCCCTGGTGAATTCCCTGAGGAGCGACCCCGCCTGGCCGTGGCCACCATGGCCCCTACCCTGTTCCAGAAGCTCTTCAGCAAGAGGAACGGCCTGGGCGGCCCGGTCCGGATGCGAGGGACCCGACTGCGCGTTCAGGTAGTTCGCGCAGGGCGAGGGGCGAGGGGCGCGGAGCCGATGGCCTAGTGGGGTCCACTTTCAGAGGCGCTGAGGCTTTCTCGAAGTTCACGCTCGCGCAGTAGTGTGCGCCCCGTACCGGGATCAGGTCCTTGGTCCGGAGGGCAGGGCAGCTGCAGACCAGCGCTGGAGGGTTCGAGCGTGGTCTCTCCCCCTCCCCACGGTCGCCCTTACCCCTTGTCCCGGGCGGTTTGTTCAGTCTTGCTCGCGGCCACGCGCGGCTTGCCACTCCAGGCGGAGCATCGCGGCCTGAGCTTAGGGGCCACACTCCTTCTGGCGACGCGTAGAAATGGGGCGGGCTGGATTGGACCTCAACCGTCGCTCTCCGGCCGAAAAGTTCTCCCTCTCCCCGCGGCTGGTGCCTCTGGTGCTCGGTTCCAGCTTGGTTGCTGTTGTGGAGAGAGCAGCACGTTTTGGCCAGCCTTCGGAGTGTAGAGAAGGCTGGAGGAGCGTGTGCGCAAGCTGCCGTTCTTTCAGATTTCTGTAAATCTAAATTAGAGGTTTGAGATAACCGACCGAGTGGCCTGAATATGTTCGAAGGAGAAATGTGAAACCTAAGAGGTTGTGCTTATTTACTAGAATGAAGCTGCGCTGAGTCAAATGAAGCATGGCCCTAGAATTGACCATCCCGTTGGAAGTGTCTAAAAACGAGTCTATAAAAATTGACAATGATACCAAGATAATTTGTGGTATTAAGGCTTGGTTATAGTACCTGTTGCTGGTAAAAAAAAAAAAAA      |
| MSTRG.114761.23 | 0     | 0.28  | 1.49E-08 | 11.89  | up     | AACTGGAGGCGCGGAGACCGGCACGCAGAGAGAGGGAGGGAGAGGACGGGACGCAGACAGAGGAGGGAGAGGAGCAGCAGCCTCGCGCGCCCTCCCTGCAGACGCCCTCCTCTGTCCGAGGGAAAGCGGCCGGGGCGCGGAGTGGCAGAACGAGAGAGATGCGGGTGCAGAAGACCGGAGAAGGTCCCCTCGCTAGTGGGACCAAGAGGCGCGGAGGGACCGCCGCGAGGGGCGAGTCAAGAGCGGATCGCGGGACGGCGGGAGGCCCGCGGTGGGCTGCCGACTGAGGACAGACGGCCAGACAGACAGACGTGCCCGGAACGGACTGGCAGCCAGGAGGCGGGAGCTCGCTCCCTCTCCGACCCAGGGCCGAGAAGGCGGCGGACGCGCCCCCGAGCGCATCTGAGCAGCGGGAGCCGAGGGACCTCGGGGTACCGGCCGAAGCCGCTGCTGTGGCCGAGCCCTGGGTGCCGAGCCCTGCCGGGAGCCCCCGCAGCCGAGAAAGGCTCCTTTTATTAGCAGTTAAATAAATCGACCCAAAATAATAACAATAATAAGCCAAAGCAAACAATACAGCCAAGTCATCCGTGAGAAACAATAATACTAATAAAAGCCACAAACCAAATCAATCAAGGAACAGAGACGCTGGGGGGAGTCCACTTTTCGGTCAAGTCTCTAGGGGCGAGATGGACCACTGAGAGTTGCTGAAAAGTAAAAGGAGAAGACTTCTCTAAAACCTTTTAATTGAGTAATTTTCACCATCCAAAAGGGGTGGCGAAGAGCCAGGTCATTATTGAATGCGAAGGAACTGAAATGGATCCAGGAAGGAGTTACCTTGCATCTGCGCTGAGGAGTGGCCAGGAGCAGCAACTCTGGGGTGGCAGGGGAGGTGGAACATTTCCAGCATCCTCTCGGAAGTTAAGGCAAGCAGAGCAGTGGCTTGCTGCTGGGCTCTCTGGCGCCCCCTCTGGCGGCTTTGGTTCTGTCTCAAGCCTTGAGAAAGCTGTTCGGAGTGCGCC |

|                |   |      |          |       |    |                                                                                                                                                                                                                                                                                                                                                                                                                                                                                                                                                                                                                                                                                                                                                                                                                                                                                                                                                                                                                                                                                                                                                                                   |
|----------------|---|------|----------|-------|----|-----------------------------------------------------------------------------------------------------------------------------------------------------------------------------------------------------------------------------------------------------------------------------------------------------------------------------------------------------------------------------------------------------------------------------------------------------------------------------------------------------------------------------------------------------------------------------------------------------------------------------------------------------------------------------------------------------------------------------------------------------------------------------------------------------------------------------------------------------------------------------------------------------------------------------------------------------------------------------------------------------------------------------------------------------------------------------------------------------------------------------------------------------------------------------------|
| MSTRG.135889.2 | 0 | 0.31 | 2.54E-10 | 11.84 | up | AAAAAATGTGCAGTTAGTGAAGTAAGAGCTTGGTGGACAGA<br>TTAAACCACAGATTGGGCATATGTGAAGAGAGAACTGGTAAA<br>CTAGAAGATAAATCAAGAAGGTACCCAGTTCTAACAGAGGAA<br>GGGATGGGAAATAGGAAAAAGCTAAGAAGCCCGGAGAACAGG<br>ATGAGAAGATCCAACATAAAGAATAGGGGAGGGAAGAGGTTT<br>GAGGGTTTGTGTTGTTTTTTTTTCCCCAGAATTTATAAAAGA<br>GATATAGATCTTCAAATGAAAAGACATAACAAATATTTAGTG<br>GTGAATAAAAACAAGTATGCTTCTAGACATATAATACAATTG<br>CAAAAGACGAGAAAAATCTAAGCAACTAAAAAGACCTTACCT<br>GCAAAGGAATAATTGCACTGGTAGCAGGCTTCTCAATGGCA<br>GCAGTATGGACCAGAAGGAAACAAAATAAGTTATAAATGATG<br>AAAAGAATGGGTGATAGCCTTGAGTTCTATACAGAGATAAGT<br>TAGCGTTCAAAGAGAGGCTGAAAAACACATTTTCAGATTTT<br>GCTGTAAGAGCTCAGGGTTGTTAAGGAAAAAAGGCAGTTGAA<br>TCCAGAAAGGAAGGAATGGACTGCAAGAAGCCTGGTGAACAA<br>AGAAATTGGTAAACAGACTGAAATTACACTGTGTAAAACGA<br>GAAGAACTTTATTAAGTATACGGAACAATCTTCAAGATATA<br>ATAAATGAAGAAGCAAGAAGTTGGCAACTGTGTTTGATTTGT<br>TACTCTCATTTGTATAAACTAGGAAAAAGCACAATATACATT<br>AGCTGCTTTATGCGTAAAATGCCTACAGGTACACACAACT<br>ATTGGGAGGACACCTGGGTGCCAGGGGACAGAGTTTGTTTAA<br>AGACAGTTTTTACTGTATATTCTTTTATTCTTTATGAGTTT<br>CTAGCAGGACTGTAATCACTTAAAGTAGAAATAGAAGTGGAA<br>AGGTTGGGAGGAAAGGTAAAAGAACACTCCAACAAAAATGG<br>GGACCTTAAGTGACATACTTTTTTCTCTCCCAAAACGTATGA |
| MSTRG.171438.6 | 0 | 0.14 | 4.71E-09 | 11.45 | up | GGCGACCACCTGCGCCGCCCACTTACCATCTGCCCCGCGGG<br>GAGGGCCCCCGGGTGGCGGAGCCCTCCCTGCTCCCGGGCG<br>GCTCTGGGGAACTCGGTGTTTGCCTCCAGCCCTTCGCTACC<br>GGAGAGATCAGGTTCTCCCTCCTCCCTCCAGCTCCGGC<br>CGCCGCGCCGCGCCTCCTTCTTGCATGACACAGCAGAACC<br>GCAGCTGCCGAGCAAGTCCCAACCATCCGCCAGGAAGCGC<br>CGCAACCGGACTCGGGAGGGGCGGAGGGGAACAGGCAGG<br>GGCCACAGCCGAGGGGATGCTTGCCCCGCTTTGCACCACA<br>CACTCTTTTCCCAGCCAGGGCATGGGAACAAAATCAGGCT<br>CAAGCCGACCAGCCAAGCCCGTGAGGAAAGCTGGGGTTTCG<br>GCGTCAGAAGGGATGGGACAAAGAGAAGGGTGTGAAGGAGA<br>CCCCAATTGAGGCAGGTCATTGCAGGGGAAGAAGGGGAAGAA<br>GAGGCCGAGAAGTCGAGGGCCAGACTGTGAAGGAGAATAAAG<br>GAGGTCAAAGAAAGGTCATATCGTCGTACCTCACTTCTGAC<br>ACAAACAAGTTTTTACTGTTGTGTCAGCAACAAAGTCTAATAT<br>AGCTGCGGAAGAGAAAAACTGCATTGCATTTGCTCCTGCAA<br>GCATCATCAACACAGTTACCGGAGGAATGTTGATTCCAGAAA<br>AGCTTTAAGGCTGGTACGATGGTAATTATGTATCAAATGCCT<br>GATTCTATTTCTGTTATTATTGTTTTGTCAATTTCTGAGCCAC<br>CCAAGAAGTGGCTGAACTCGCAGAGGGACAAGTCCGGTTCTT<br>CTTTTTGCCTCGGTAATAATTAATCAGACCTGATAGAAA<br>ACTATTGCTCTAGGGGAAAAATAAAGTAGGAGCCAGAAATGTCA<br>TTTTAACAGAGCGTGGGTTTTGTGACTGTAGGAAAGGATTTA<br>AGGACGCTCCTTCTGTTTCGGTTTCTATGTAATGAGCAAAGG<br>CTACACGCACGCACAGACGCCACAGCTCCCGATGCTGTGGC               |

|                |      |      |          |       |    |                                                                                                                                                                                                                                                                                                                                                                                                                                                                                                                                                                                                                                                                                                                                                                                                                                                                                                                                                                                                                                                                                                                                                                                                                             |
|----------------|------|------|----------|-------|----|-----------------------------------------------------------------------------------------------------------------------------------------------------------------------------------------------------------------------------------------------------------------------------------------------------------------------------------------------------------------------------------------------------------------------------------------------------------------------------------------------------------------------------------------------------------------------------------------------------------------------------------------------------------------------------------------------------------------------------------------------------------------------------------------------------------------------------------------------------------------------------------------------------------------------------------------------------------------------------------------------------------------------------------------------------------------------------------------------------------------------------------------------------------------------------------------------------------------------------|
| MSTRG.117744.2 | 0    | 1.41 | 4.01E-08 | 10    | up | <p>CTTTTACCCCCACCCCACCCACCAAGACTGCTGGACAGAGC<br/> TGCTGCTGGGATGCAGTCTGGTACCTGGACTGAAGATGGGAG<br/> GGAAGGGACACCGCCCTGGTGTTACTCCTACCTGGGTGGCTG<br/> GAGGGTGACCAGAGACATCATCCTTCTCCTGTGTGAGCTGAG<br/> GGGCATGAATGTAGACGTGCTGCGTGTGGGGAGGGAGGGAGG<br/> CGCTAAAAGGCTCTGAATGTGACCATTTTGGTGAGAAGGAG<br/> GGAATGCTGTTTTTACATGTCTGTCCGGCAAGAGTCATGCTA<br/> AAAATGCACAACCCCTGAGTAAAGACCACCACTTCCCCAAAG<br/> AAGTCGCCCATGTCAATCAGATGAGTGAGGAGAACGAGACT<br/> GAGCCTCTAGGATGGAGCAGCCCCAAGGGAATGCTTGGGGG<br/> TTCCTGTGGGCCCAAGGTGCTCCACGGGGCAGCAGGGCA<br/> CAGAGACAAAGCCCCGGAAGTATCAGAACAGACCGCGAGTAC<br/> CACGGTGCCCCGGAGCCTGACAGACACCCTGTTCCCGCCA<br/> GCGCTCCGTCCCCACTCCTCTCTGGCCATCTCCACGGCAGG<br/> GGCTGAGTCGGGGCTGCAGACTCAGCATCTCCTGGTGCAGC<br/> CTCCGCTGCAGCCTGGGGCACCACGTGACCAGGCTGAGGTG<br/> CCTGGAACCACAGCAGCCATGTTGCTACCATGAGAAAATGGC<br/> CAAGAGAATCTCCAAGACACGGGCCCTGACTGTCTGTGACCA<br/> AGCCAATGCCGGCAGCCACCCTCCTCCAGGATTCTTGTAAT</p>                                                                                                                                                                                                                                                                                        |
| MSTRG.177057.2 | #### | 0.63 | 1.77E-08 | 9.646 | up | <p>GGGAGACCAGGTCATCCGTCCCTTCCCCACCAGTCCTCTTA<br/> GGGGTGGTGGAGATACGGGCCGAGAGCTGCGAGTCCCAGC<br/> TGTGCGGATTCCCTAAACGCCGCACTTGCTCACAGCCCCTTA<br/> CGTAACTGTCAGCGCCGGGATTCCCTAGAGGGGGTCATTCT<br/> ATTCAACCATTACACACACCCGGGGCTCCTGCCGCCGCGCCG<br/> CCGCCTCACAAAATGGCGGGCAGCCATAGAGGAGACAGCGGCC<br/> GCCTCCTCGGCCCATTTTGTGGGAGGGCAGAGATCTGTCAA<br/> CATGGAATACCTCCGCTAAGGATGCATATGAGTTTGAAATC<br/> CTGCTTAAGGGATGGAGCCGAGAGGATCTGCTTCAACGAAA<br/> ATGTCAGCGACTTCTAATACCTCCACGCTTTTTCACTTTTTT<br/> CATTTTTCTCTAAGGAAGCGCCGAAGCTGCCGGGGACTTGT<br/> AACTGAAGAGAGAAGGAAAGCTGCAGCTGACTGCTCCGGGA<br/> ACTTGCCGCGCGTGTTTTGGCTTTGGCTGCTCTTCCCCGCT<br/> CCCAGGAGCTGACCGCGGTCTCGTGGAGGGTCGCTGGGCCG<br/> CCCGGACGGCTCAGAAAAGACCGGGACCCGGCGACGCCAAGT<br/> GGCAGCGGTCTCCGCCGAGTCACTTCAACAGCGAGACTTTTC<br/> AGTAGTTTTTAAATGCCAGGGTCCACCGCCAACCGGGACCC<br/> CTTGCCAGAGTCGTGAGCTTCGGGAGCCGCGGACGCTCCTGC<br/> TCCGTGAGTCGGCCGGAGCCGGTTGCCCGAGTCGGCGGT<br/> CCTCGCGGATGCCGGCAGCCACGGCGCGCCGGTGGTCCCG<br/> TCGGGACCCGGGCCCTGGATGATGCTACTGGGGCAGGAGTGG<br/> GAACGAAGGCACGTACTGAAAATTAAGTCGTCTGGACCTA<br/> GGTTGTATGTTTTAACCGTGTTTTAGGTTAAACGTTAGAAC<br/> GTTTTTCTCGTATCCCACTGGAGTGGGCGAACCTGGCTGTC<br/> TTATTTCAATTTCAAGGGCAGGATGGAGGGTGACATTTTC</p> |

|                |   |      |          |       |    |                                                                                                                                                                                                                                                                                                                                                                                                                                                                                                                                                                                                                                                                                                                                                                                                                                                                                                                                                                                                                                                                                                                                                                                                                                 |
|----------------|---|------|----------|-------|----|---------------------------------------------------------------------------------------------------------------------------------------------------------------------------------------------------------------------------------------------------------------------------------------------------------------------------------------------------------------------------------------------------------------------------------------------------------------------------------------------------------------------------------------------------------------------------------------------------------------------------------------------------------------------------------------------------------------------------------------------------------------------------------------------------------------------------------------------------------------------------------------------------------------------------------------------------------------------------------------------------------------------------------------------------------------------------------------------------------------------------------------------------------------------------------------------------------------------------------|
| MSTRG.79992.12 | 0 | 0.21 | 1.48E-07 | 9.315 | up | <p>GTACACAGCCGGTCCGGGCGGTGCGCAGGGGGCCGGGGCGCG<br/> TGCAGGTGAGGAGCGGGCACGAGCAGGCGCTGCCTGGTTCT<br/> GGCTGGCGGGCGGGCGGGCTCACCCACTGCGGGGCGGGAGGG<br/> CGGTGGGCCGCTGCCGGGCTGGCGACTGGATGAGCTCGCGG<br/> GGCGTCGCTCCCGCTCGGGGCCTCAGTGCTCAGGGCCGTCCG<br/> CTCCCGCCCCCTGCCTGTCCGCTGTGGAGGACGCCGGGCTCA<br/> GGGGAGCTGGCTGGGCGGACGGAAGCCCGGAGAGGCCCTCGC<br/> GGCTCGTGCTTGGGACTGGGGCGCGGCAGGGACCCCGCGGA<br/> TACGAAAACCCCTTCGAGGAGTACGCGGAGGGACCTCGGCCT<br/> ATGGGTCTCGGGTCCGCGGGGACTGCCTAGGGACGCGGCC<br/> TCACGCCGCCCTGCGGCTGCCGGTCCGCTGAGCTCACCTTCC<br/> CCGCCGGGCGGGCCGGGCCGCCCCAAGAACACGATTT<br/> TCCGGCCCCGCTGAGCCGTTGGCGCAGTCGGGCCCGGGGAG<br/> GTTGCGCGGGGACCCCGAGAGGGCCGGGGATGAGGATGAAGG<br/> ATCCAAGCCCAGGGGCGAGCGCAGGGTCAGGGGTGTGTCTT<br/> CCTGCTCTGCTCGGTGCGAGGAAAGAAGCTTGCTGGTTGGC<br/> ATGATAAGAATTTTATTTATTCTCCTCACAAATTTTGCCAGA<br/> TGGAATACTTAGCTTTGAGGGGAGAGGCCCTAATTTGAAAAT<br/> AGCTTTCAAATTCGCCCTCACTCCCATTATAAAAGCAATT<br/> CATTCTCCTTTCTTCTCGCTCAAGACTACACAAAGTGTGTG<br/> ACAGTACTTTTTAAAGTAACAGTCATCATGTAACCTACCATT<br/> CAGTGATAGCCATTGCTAAGATTTTGTGATACCAATAAATA<br/> CATGTATTATCACTTTTATGGACTTCATTATACCTTTGTATA<br/> TCACAATTTAACCAAGTCTACTAATGAACATGTAAGGTGCT<br/> TCCAATTCGTCATGGGATAGATGATTCTGCCACAGAATTTGT</p> |
| MSTRG.41883.2  | 0 | 0.15 | 1.10E-06 | 9.213 | up | <p>GGGTGGGCTCCCCCTGAGCCAGAGTAAAGTGCTCAGGCCTC<br/> TCATTGTGGTGGCTTCTCTTTTGAGAGACAAGCTCTGGAG<br/> CTCATGGGCTTCACTAGCTGTGGTGTGGGCTTAGTTCCCTG<br/> CAACATGTGGAATCTTCTGGACTAGGGTTCAAACCCATGTC<br/> CCCAACATTGGCAGGAGGATTCTGAACCACTGGACCACCAGG<br/> AGAGTCCCAGAGTCTTATTTTTCAATCCACAGGTTAAAAA<br/> CAATGCCTTAGATCATTGCTCAATCCAAGATACAAATGCC<br/> AATCCAAACACTTGGGTAAAGAATTGGATTTTGATTGATTCA<br/> AATTCACAGTTCGGTTCAGGATTTTATCTTATTTTATTTTAT<br/> TGTAAGTAGAAGAGACAAACAGACTCACTGTGAAATCAGCG<br/> AACTATATGTTAAATAGAACCATCCTTTTTCTTCTGGATGAA<br/> TTTCTACTTTTTAAATAGATCATTGAGTTATCATTGTAAT<br/> CCTGAACACGATTTTGTGAAAATGTACTCTAAAAATATACT<br/> AGGAATTCAAAAATCAGTTTCATTTCTTAGGATCTCCAGCT<br/> TAATGTACATGTTCCAAAAAGCTTAGATTTCTTGGACTTCT<br/> AACACTGCCAATTTTTAGAATTTAAAAATCAAATTTGTGTT<br/> CATTTTTCATGTGTTGTTATGAAGTTACAACCTGTCTTCCAT<br/> ACTGACCTCTCTCCCATGTATAGAGTTTACAGAGCATTAC<br/> ATTTGTGGTCATGCTAGCTTCACTTTTAAAGAGAGAGCCTAAT<br/> GGAATAACTAACTTTTCTGATCTTTTCTGCTACTGGTGG<br/> TATTTCTTAGCTATTTTTAAATTATCTTTGGGCTTCCGCAT<br/> GGTGCTAGTGGTAAAGAATCTGCCTGCCAATGCAGGAGACAC<br/> AGGTTCATCTCTGGGTGGGAAGATCCCTGGAGTAGGAAA<br/> TGGAACCCACTCCAGTATTTTTACCGAAAAATTCATGGA<br/> CAGAGAAGCCTGGTGGACTACAATCCACAGACTGAGCAGAC</p>           |

|                 |      |      |          |       |    |                                                                                                                                                                                                                                                                                                                                                                                                                                                                                                                                                                                                                                                                                                                                                                                                                                                                                                                                                                                                                                                                                                                                                                                                                                                  |
|-----------------|------|------|----------|-------|----|--------------------------------------------------------------------------------------------------------------------------------------------------------------------------------------------------------------------------------------------------------------------------------------------------------------------------------------------------------------------------------------------------------------------------------------------------------------------------------------------------------------------------------------------------------------------------------------------------------------------------------------------------------------------------------------------------------------------------------------------------------------------------------------------------------------------------------------------------------------------------------------------------------------------------------------------------------------------------------------------------------------------------------------------------------------------------------------------------------------------------------------------------------------------------------------------------------------------------------------------------|
| MSTRG.155031.14 | 0    | 0.08 | 1.26E-07 | 9.193 | up | <p>CTCTAAGGTTGTGAGCCTGGTGCATGGTGGCAGTCCCCGGAG<br/> TAATGAGGTTGTGTTGACTGTAACCTCATAAGCTCAGTGGTA<br/> TGCAAATCTTGCATACAGAAGAATATTTAGAAAGAAATGTCC<br/> TACCAATAATTAGAGCCAAAGGACTGAAGGGACAGTGGGAAG<br/> TCTCAGCAGGAAGGCTAGTTGGAAGTGTGCTACACGTTTGG<br/> GATCTGTTCCCTGACCAGGGATCAAACCCGGCCCCCGCTAC<br/> ATTGAAAAGTCTCAGAGTCTTAGCCACTGGACCACCAGGGAAGT<br/> CCCTGTTTTTTCATATAGAATGTACTGTTCTGTGTCTTGCTC<br/> TGTTGCTCAACATTATGTTTCTTATTTGAAAAATATGTCTC<br/> TCAGTCACCAGGAAATAGAAGTTAAAATCACAGCAGTATTCC<br/> ACAATATCCAGTGTTCGTGAGGACGTGACGCGCTGGGTCCCT<br/> CATACACCTCTGGTTAAGAATAACTTGATGCTCCTGAGACGT<br/> GGCCTGCACAGAAGAGAGGACTGTTCCCTGCAACTGAGACCAG<br/> TTGACTGCCTTTGGAAAAGTACCATCCGTGCCACAGTGGCGT<br/> CTGTTTCCCATGTGGAAACAGCAGTTATGACCAGTAAGTATTC<br/> TGTTAAGAACCCTGTGTTAAAGACTTGATATTCTTCAACAC<br/> TTCAGCGGAAGCCCCACTGCAAAGGAATCATCTACTCAGGTC<br/> AACTGTTGATAGAATGGCTCAGCCAAGGCACTTAGCTGTGAT<br/> CCCAGAATGATATCTTCAGCACTGTCTGGTGAAGAGAACAGT<br/> CTGAGAGACATTCCATTTATTTTCTCAGCTACCTGGTGATGA<br/> AGATGTTATTTCCCTCCACATCCTATATGAGGGAAGTGGGTC<br/> TGGGGTGTAAATGACTAAAGGGCAGAGAACACAGTCAACAA<br/> GTAGAAGAACCAGGGCTCTCCTCTGAGGTTTTCTGGGTTCCAG<br/> ACCCTGTGTTCTTGCCATTCTACACATTAAGTGATTAGGGAC<br/> TACTGATGAGCAGCGGATGGATTGTGGTAATGCAGGAAATC</p> |
| MSTRG.16644.1   | 22.9 | 9670 | 0.02689  | 8.915 | up | <p>CTGGCAGGGGAGATACCATGATCACGAAGGTGTTTTCCAG<br/> GGCGAGGCTTATCCATTGCACTCCGGATGTGCTGACCCCTGC<br/> GATTTCCCCAAATGTGGGAAACTCGACTGCATAATTTGTGTT<br/> CTGGGCTGCAGTGCCTATGCCGATCGGGTGTCCGACTAAG<br/> TTCGGCATCAATATGGTGACCTCCCGGGAGCGGGGGCCACC<br/> AGGTTGCCTAAGGAGGGGTGAACCGGCCAGGTCGGAACGG<br/> AGCAGGTCAAACTCCCGTGTGATCAGTAGTGGGATCGCGC<br/> CTGTGAATAGCCACTGTACTCCAGCACGGGAGTTTTGACCTG<br/> CTCCGTTTCCGACCTGGGCCGGTTCACCCCTCCTTAGGCAAC<br/> CTGGTGGTCCCCCGTCCCGGGAGGTCACCATATTGATGCCG<br/> AACTTAGTGCGGACACCGATCGGCATAGCGCACTGCAGCCC<br/> AGAACTCCTGAGCTCAAGCGATCCTCCAGCCTCAGCCTCCCG<br/> AGTAGCTGGGACTACAGGCGCGCCACCGCGCCCGG</p>                                                                                                                                                                                                                                                                                                                                                                                                                                                                                                                                                                                                                  |

|              |   |      |          |       |    |                                                                                                                                                                                                                                                                                                                                                                                                                                                                                                                                                                                                                                                                                                                                                                                                                                                                                                                                                                                                                                                                                                                                                                                                                                               |
|--------------|---|------|----------|-------|----|-----------------------------------------------------------------------------------------------------------------------------------------------------------------------------------------------------------------------------------------------------------------------------------------------------------------------------------------------------------------------------------------------------------------------------------------------------------------------------------------------------------------------------------------------------------------------------------------------------------------------------------------------------------------------------------------------------------------------------------------------------------------------------------------------------------------------------------------------------------------------------------------------------------------------------------------------------------------------------------------------------------------------------------------------------------------------------------------------------------------------------------------------------------------------------------------------------------------------------------------------|
| MSTRG.1356.1 | 0 | 0.15 | 6.56E-07 | 8.17  | up | <p>CGGGTCCGGCTCCAGTATCATCAGGAGGACAATGAGAGGTAG<br/> TAATCGATAGGTAACCTGACAGAAGCATGCAGGATATCTGAGC<br/> CAAAAGTCGCTCCCCTCCATCTTCCCAACTAAGAATGCTGT<br/> TTAGTGATCAAGCTGAAGTTCCAGTGTGTTGGTCATCTGAT<br/> GTGAACAGACAACCTCGTTAGAAAAGTCACTGATGCTGGGAAA<br/> GATAAAGGGCAGAAGGAGAAGAGGGCGTCAGAGGATGAGACG<br/> GCTGGACATCATCACAATAACAATGAATATGAGGGACAGGGA<br/> GGCTGGTGTGCTGCAGTGCCTGGGGTCACAAAGAGTCCGGAC<br/> ATGACTGGGTGACTGAAACAACAAGCAAAGGTATTGAGAC<br/> AAAAAGGTATGAGCTCCATGGAAGTAGGATGGAAGGAAGTTA<br/> CTAAGAAAGCCAGAAGAAGCGACAAAGAGGAGACGGGGTCTA<br/> TTGACTGAATATGATGAAAAGCACTTTGTCATAACCAGCAA<br/> GTTCCACAAAAGGGAACCCTTTGCCAACCTGGCCACGCTG<br/> TCCACAAAAATTCAGATTTACCCCATGCCCTGCCACAGGGCG<br/> GTGGGACGTGAGTGCCCAAATCTTTGGGGAGAAACTGGGTGA<br/> AGCAATAGTAGTGGTTCTTAGCCTTTCTCGAGGATTCTTGC<br/> TTAAATGCTGGGCAGATCTGGCACCAGTGTGACTTCCCCTT<br/> GCTTGGTGACGTGATGAACGAGTGTCTTTGGTTTCTTCTC<br/> TTTTTTCTACCCACATGCAAACCTGACTCCTCATTATGGT<br/> TTCAGGTAAAAACAATGCAAAGCTTGGCGCCAGAAATCCAT<br/> TCAAGACAGAACTTTGTGGTTTACCAGACTTGTGAGTCTCG<br/> AGACTTTATTTAAACCCACAGTTTATAACCTCAAAATAGTCC<br/> AACCCAGGCAAGTCAAGTTGTTTTTAGAAGAAGAAAGTTCTC<br/> CAGAAACCTAAAAATCCCCTATCTTTCAGTTCCTCAAGTGTTC<br/> CATCATTGAAGTCACAATTCCTATTTTATTACATGAGAATC</p>          |
| MSTRG.6892.3 | 0 | 0.12 | 1.87E-06 | 8.087 | up | <p>AATACACAAGAGCTCTTTGGTTCTCTTTTTTGGAGGAAACCT<br/> GAGCCATATTTTTATTATCTCTTATGTCATCTTAGAGTAAAT<br/> TTAGAAATATATAAGTATTTTAAATTTCCATCTCATTTAAA<br/> CCTAATATTTTTCCCAAGTTTGTGTGATACATTTACTTAAAA<br/> AAATGTATCCTCACTTTTCTGTTATTTACCATTTTCAAAAA<br/> GATAGGAATCGAAAAATATATTCAAACATTTGGCTCATGATT<br/> CACTGGTTTTTTTTTTCAGCCTGTATCCCTCTTTGATATTTT<br/> AGCCACTGCCATTAGCAAGATTTTACTTACCCCAAAGTTAG<br/> TGTTAAAAAAACAAATCAGTTTGAAGAGTGGTGGTTGTAGAG<br/> AAATTATTACATTCTTTACTTCAGTAGCCCTGTGTTTACTAA<br/> ACAGAAACAGAGAACTGGAGGTGAGTTACAACCAACATTGGA<br/> AGCTACAGATTATCTTTATGATGTTCTTATATAACATGTTTT<br/> ATAATCAGGTCCCTTGATTTTCAGGTGGAATCTGCCAGTTCA<br/> TAAAGCTAAATGAGTCTTCCCTAATAGAACTTTTTGGGTCCAG<br/> TTACATAATTTTCAGTTTCCCTGGGTAAGGAATTGATTCATA<br/> TTTACTTTTTTTCACCTTCTGAAGAGGTGGGTTATTTTTGG<br/> TTCTACTTTTACACTACCACTTGGAGGAGCTCATTATGACAT<br/> GACATACTTTTGGAGTACTAATAATGTCTAGGGAGTAACTAT<br/> TCTCATTTCCCATAGATTCATCCCTCACATATGCTTAAACATC<br/> ATTTATTGGTCAGTTTCTGTTTTCTTTAGGTTACATATTCTT<br/> TACTATATTAGTATACTGTGTTTATGGACAAAAGAGTAAACA<br/> ATGGTTCAGAAAACTTTCTCAAAGGTACTCAGCTCTGCTA<br/> AACTTTAAAATCCCAACCTTACAAACCCCAACATACCTGTCA<br/> CTTAGTCCAAGGACTGATGAGAAGAAATTTGGTCAGTAGGA<br/> AAAGTTTGGAGCAGTTGGGTGAATATTGATTATTTCAACCATT</p> |

|                |      |      |          |       |    |                                                                                                                                                                                                                                                                                                                                                                                                                                                                                                                                                                                                                                                                                                                                                                                                                                                                                                                                                                                                                                                                                                                                                                                |
|----------------|------|------|----------|-------|----|--------------------------------------------------------------------------------------------------------------------------------------------------------------------------------------------------------------------------------------------------------------------------------------------------------------------------------------------------------------------------------------------------------------------------------------------------------------------------------------------------------------------------------------------------------------------------------------------------------------------------------------------------------------------------------------------------------------------------------------------------------------------------------------------------------------------------------------------------------------------------------------------------------------------------------------------------------------------------------------------------------------------------------------------------------------------------------------------------------------------------------------------------------------------------------|
| MSTRG.112338.2 | 0    | 0.09 | 9.39E-05 | 7.136 | up | CGCGCCGCCGCCCTCCTCAAGCTGCCGCCGCATGTTTT<br>CTTCCTTATACCTGGCCCTGCCACCGCAGCCGGACGTTGTGC<br>TCCTCTCGTCTGCTTCAAATGTCCGAAGCTGACGGGCGCCAG<br>GTCCCGCTGCAACTTCTACCACTGCGCGGAAGACTCCGAGAG<br>CCCCAAGCGCACGAGCGCTTCTGGCTACTGGGAGTCCCTGT<br>CCCTCCGCCGCCGCCGCCCTCCTCCGTCTTCTCACCGAG<br>CCAAAGCCGCCCATCTTGGTTCGCCCTCAATAGTGGCGC<br>GCGCGGGGCCACCCAGGCAGCGGCTGCAGGGGCGGCCGTTG<br>GCCCCACCATTTAAAGAGGCAGGAACGAAGCTGAATCAATCC<br>AAGTTTGCCAGAGCACGTGGCTTCTCTCAAATACCAACAG<br>TGAAAGATTCTGGGTGATCTGTTATCGGACCCACGTCCAA<br>GGTCAGGGGTGGCGGCTGAAAGGAGCAAACCCACGTCCAAGG<br>AGCGGCTGTTGCGCGGGCGCAGGAGGACCAAGAGGAGTACT<br>CCACATTCAAGGTCAGGAGGGCTGGCTGTGAGGAGATACCCC<br>ACATCCAAGGGAAAAAGCCTCCAAATCATAAAGAAGATAATA<br>TAGACTCTGGTAGAGAAATAGAGAAGAGGAATCCTTTAAAAAG<br>AAAAATTAATCTCTACAAAATGTATAAAGCATGGTTGTGAG<br>AAAGGTGGATTCTTAACCCATTGAACCATCAAAGAAGCCTGA<br>ACACCGAAGAAGTACGGTTTCAAATTGTGGTGTGAAGAAA<br>ACTCTTAGAGTCCCTTGACAGCAAGGAGATCAAACCAGTCA<br>ATCCTAAAGGAAATCAACCCTGAATGTTTCATTGGAAGGACCC<br>TTGCTAAAGCTGAAGCTCTAATACTTTGGCCACCTGATGAGA<br>AGAACTGACTCATTGGGAAAGACCCTGATGCTGGGAAAGATT<br>GAAGACAAAAGGAGAAGAGGGGCGACAGAGGATGAGATGGTT<br>GAATGGCATCGTCAACTCAATGGGTATGAATCTGAACAAACT        |
| MSTRG.192050.4 | 0.01 | 1.05 | 1.25E-06 | 6.912 | up | CGGGCAACTTGGATGTTCTCTGCGCACACTGGAACGTTCCAT<br>GTTTGCAGCGGTGCAGACCAGCAGAGAGAAGAGATTCCATC<br>TTCCAGAGGTGCCACTGTCTGCCTCCCCACTTGTCCCCATC<br>CTCGGTCACTCTTTTAAACACATTATTGACCAGAGATGTATT<br>AATATGTCTTTTGTACCACAAATGTTATTGACTGGAGATATA<br>TCAATATCACTTGATAAGAAATTGCTGGCCACAGGTGTTAGT<br>CTCAGCAAAAATCCCCCGGTCAATAATGAGTTAATATGTAG<br>TGACACATTAGTTGTGTAGTTATTCATAGTGAATGTGGTTTA<br>AATCCTACACTATCCTCTTGACTTGAATATGAGCCTTAGTG<br>TTTTTCTCACTGCAGTGAATCTTTGAGTTTGTGAACTCTTT<br>CCCTAATGATATTGACTGTTTTCAATTAACAGATTTATTACC<br>AGTTTCTGGTATAGAGTCTCAAATGAAACAAAGTATTTTTGA<br>TTGTCTTTCATATCTTTGGCTAATTAGATACTTATAATGGAA<br>CATATAAATACTTTTTTAGAGAATTTCAAGGAATAGTGTTTA<br>ACAGAATTTGAAAATTACAAAATTATTATTATTGTTTAATA<br>TTAATCTCAGAATGGTTTCCCTTTAAATTTGCAGTGAGTT<br>TTCCCCCATTACTCATGATAAAAATAGATTTATTAATTGAA<br>AGAAAATATATTTAAATGTCAAGGAAATAAATGAATAAGTCC<br>CTTCTATTTGTTGCAGCTTATTATTTCTTGAAATGAATTACC<br>TAAAAAGCCAAAAAGTTACAAATAAAATATTCTTGGTGATTA<br>AATTTTCCAATTTGGCCTTGCTGTGTGAGAAGTTTACAAAT<br>CAAAATGTGCTTGGGTGTGAAACATCATATGAGCCTGGCAC<br>AGTGTTTTTAAGTGTATGGAGCTGGGCAGCAGTCTATCTCAT<br>CTGGAGGCAAGGTTACAGCAGACTTTTATATTAATGCCGTTT<br>TCGAGGCAGATTTTCGGTATTCTCCAACAGAGGCTTCCCCA |

|                |   |      |          |       |    |                                                                                                                                                                                                                                                                                                                                                                                                                                                                                                                                                                                                                                                                                                                                                                                                                                                                                                                                                                                                                                                                                                                                                                       |
|----------------|---|------|----------|-------|----|-----------------------------------------------------------------------------------------------------------------------------------------------------------------------------------------------------------------------------------------------------------------------------------------------------------------------------------------------------------------------------------------------------------------------------------------------------------------------------------------------------------------------------------------------------------------------------------------------------------------------------------------------------------------------------------------------------------------------------------------------------------------------------------------------------------------------------------------------------------------------------------------------------------------------------------------------------------------------------------------------------------------------------------------------------------------------------------------------------------------------------------------------------------------------|
| MSTRG.224405.8 | 0 | 0.28 | 3.74E-06 | 6.636 | up | TTTTTTTTTTTCCTTTCGTTCCCTGTCCATTTTATCTAGTT<br>TTATATAAAAAGTCTGGGATCCCCACAGTGGGGTTGAGCCA<br>AGATGGTCAGGCCCTTGGCCTAACTCTGCCCAAATAACT<br>GTTGGTCAGATATCGCAATGTGAATTTCTCTAGCCCCTAAA<br>TAATGGCTGCAGCCTGATGGCCACTAGATCATAGGTGTTCTC<br>CTTCCTGAGTGCCCTTAGGGCTCACCAGCTCTCGTAGGAAGG<br>CTGCAATCAACTGGTACTATAGCATCCTCGTTTGCTGGTAT<br>GGCAGAAGCTATTCCATTTCTCACTTTCTTAAACATCTTTTA<br>TTTCTTCTAAGCCTACATCCCTTTCCCTCTCATTTCCTTAT<br>TAATGTGATATTTTGTGTGTATATAAACTGCTTTTTATCA<br>TTTATTAATAATTTTGTATTGTATTGAGATATCTATTATAT<br>AAGTTTCAGGTATACAGCACAGTGATTCACAATGTTAAATG<br>TTATTCTCTGCTTATAGTTATAAAATATTGACTGTATTCCTG<br>TGCTGTACAATTAAGGTAGTATTTAAGCTGAATTCTAAGG<br>AGATACTCATTTTTCCCTGGGTATCTCCCATATATACATGAG<br>GTATACATGTTAATAAACTTAGCCACCTGATGCAAAGAAGT<br>ACTCATTGGAAAAGACCCTGATGCTGGGAAAGATTGAAGGCA<br>GGAGAAGGGGACAACAGAGGATGAGGTGGTGGGTGGCATCG<br>CTGACTCGATGGACATGAGTTTGAATAAACTCTGGGAGTTGG<br>TGATAGACAGGAAGCCTGGTGTGCTGCAGTCCATGGGGTTG<br>CAAAGAGTCAGACACAAGCCACTGAACTGAACTGAACTTTT<br>GTTCTTTTTCTCTGTAAATCTGTCTTTTATTAGAGCCTAG<br>AACTCAGAGGGGTAGAGGGGAAATATTTTTCTCCCTACA<br>ATACGAATATTTTAGAAAATAATTTTGTGTATCTATCTATGT<br>AGTCGTGGCTGTGCTGGGTCTTTGTTGCTGGAAGGCTTTTC    |
| MSTRG.102013.2 | 0 | 0.25 | 3.86E-05 | 6.009 | up | GGAAATAACAGCACTAACTGGAAGAGACGTGTGACCGCATGT<br>TCATCACCGCGTGGGTACAGTGACCAGGGCGTGGGCACAGCC<br>GAGGCGCTCGCTGATGGATGAGCGGATGAAGCGTGCGACGCA<br>CGTACGCGGTAGATGCCGTTCCAGCCACAAACAAAGAAGACCC<br>TGCCTGTGTGACGGCATGGATGGACCCTGAAGGCCTTATGCT<br>GAGTGAAGTAAGTCAGAGAAAAGCAAACATCATACGGTCTCA<br>CTTGTGGTAAAATCTGGGGAAAAAAACAACGAACCAATCC<br>CAACAAAAGAGCGTAGTTCGGGAGTCACTATGAAGCCAGG<br>GGAAGCAGACTTGGGGCTCTGGAGAATGGAGGAGCCAGGCGT<br>TGGCGCATGGGACACCATTTATCTGATGCAGAGGCAATGGA<br>AACAGTTTTTCATCAAATACCTGTATTATAGGTTATGGTAAAA<br>GTCCAGATGTTTATATGAAGACGAAGTGAGCCCTCACTCCC<br>TGTAACCTGTCTAGCTGCTGAATTCATCTGCAGCCGGTGA<br>CTCTGCCCCAGTAAAAGCTCTTCTGGGGTGTACGTGGCCAA<br>AAGCAGACCAACTGAAATTCACAAGGCACGAAGCTGTCTGC<br>CACCTCCCCGGGCTCTGAGGGTGAGCATCGTGATCTGGAGG<br>GAAGACGGCAAACGTGCTTGGGGCCGAGCGGATGTCACT<br>CTAGTCGGAGCTGATGTGACGACCTGTGTACCTTCGCTCAG<br>CACCCAGACTCTTTCAGCCGCCGTCCTTCCATGCCTGTTT<br>CTGAGCCAATCACCAGGCCAGGGGCCGAGGGTGGAGGATGC<br>TGCTTGGCCAGACGTGGGGCACGGTGCCACTTTCTGAGGGA<br>GGGAAGTGCTTTAGCCCACCCACCCCTAAGGACCCATGGA<br>AAGGAAGAGCATGGCGATGTCTCCCGAAGGAAGAGAAATGGG<br>TGGCAGGTCTGCCTTCAGACGAGACCAAAGCCTGAAGCCTG<br>TTCTTTGAGGAGGAGTCTGGAGTTTCCATCAAAGTGACTCC |



|                |   |      |          |       |    |                                                                                                                                                                                                                                                                                                                                                                                                                                                                                                                                                                                                                                                                                                                                                                                                                                                                                                                                                                                                                                                                                                                                                                                                              |
|----------------|---|------|----------|-------|----|--------------------------------------------------------------------------------------------------------------------------------------------------------------------------------------------------------------------------------------------------------------------------------------------------------------------------------------------------------------------------------------------------------------------------------------------------------------------------------------------------------------------------------------------------------------------------------------------------------------------------------------------------------------------------------------------------------------------------------------------------------------------------------------------------------------------------------------------------------------------------------------------------------------------------------------------------------------------------------------------------------------------------------------------------------------------------------------------------------------------------------------------------------------------------------------------------------------|
| MSTRG.54320.15 | 0 | 0.16 | 0.00016  | 5.861 | up | <p>CGTGTTCAAGTCCCGTGTGGGCGTCCGTCCCAACCTCCCCTT<br/> CACCCCCACCCCTCACCCCTGGTAACCGGAAGTCTGTTTT<br/> CTACACCTGTGACCCCGCTGCTGCTTTGGAGGTAAGCTCTTG<br/> TGCGCTTTTTTAGGCCCGCACGTGGGCGACACCGCATCCG<br/> TTTGCTCTCCCATCTGACTTGCTTGGCCCCGTGTGACAGTC<br/> TCCGGTCCGTCCGCGTCCGCGTAACGGAAGCGCCGCGCCCTC<br/> GCCTGGGCCCGCCGCGGATTCAAGAGGTGCTTTCTCTGCC<br/> CTCCAGGTCTGTGACTCGTCTCTGTGAACGGGCTAAC<br/> GTGCTGCACGTGACTACCGGACGGTGAGCAACCTGATTCTG<br/> ACCGGGCCGCGGACCATCGTGATGGAGGTCATGGAGGAGCTG<br/> GAGTGTGAGCGGGCCGCGGCCTTACTGCGCACGTACGC<br/> GTCTCATCCGAGTTTCTGCACTGCTCCCTGTTGAATGTGG<br/> GAGAACCAGGGAGTGTGCTTTAAAAAAGAAAAAGTAAAA<br/> AGACAACGTCTGTGCGTGCAGAAAAAGTTGGGACACAGAAT<br/> TTTTCCCCTACGTAGTTGCGTTGCCTTACTCAACTCCGTT<br/> TGTGGTTCTCGTCCATTGTTTTGGTCTTGCTTACAATAAG<br/> TTGAGATGCTTCTCTCGCCGAAACAGCACCGTGCTAAATTTG<br/> CCTTCGTGGGAATCAATACAGTAGTTTTCTAGACTTTACAG<br/> TTGACTCTCACAAAACGAGCATGGATCTGTTTATCAGAGG<br/> ATCTCGAGTTCAGTAAATTTCAAAGCAACATCCAAAG<br/> GAATAGTGCTTGTAAACGGGCGTTTTGAAGTTCTAAGGCGT<br/> TTTTGACTTTTTCTAATTCCTGCCTTAGTATCAACTTCT<br/> AACTAATGTGTGTTTTCAATTACGGCAGTGGTCAAAGCAA<br/> ACACTTTGTGATGACGTGGGTGGGCGAGAGAGAGAGAATT<br/> ACTTAAACTATGTGGGCTCTGTTTTCTTCTGAGCCTGGA</p>          |
| MSTRG.80654.2  | 0 | 0.29 | 5.23E-05 | 5.759 | up | <p>CCAGAGCTGGCTGCCCTGACTGAAAAACGGTGGTAGAAATA<br/> AATCATTGCCACGGAGTGCAGTTATTATGGTGAAAGTTCAT<br/> TCTTGCAGGTTGTGACCGCGGACTGCGGGCTTTTATTGAGGT<br/> GAGGAGATTCTGCTAGGCTCGCTGATCTGCCCGTCCGACAGA<br/> GCACGGGGGAATCCCTGGTGCGGCGCTTCTCGGGCTGAGGG<br/> GCCTTCCCGCCGGTCCCGTGAGCTGGGCGGCTGCGGGCGGC<br/> TCTGGCACGGTTGCAGCCTCCCTCTCGCCAGTGACTCACTCA<br/> CAAGGGGCGGGGAGGGGGCTTCCCTGGAAGCCGTGACGAGG<br/> AGGCTCGACCCGACGCCCGGGTTCCCTCTGTAAACAGGGT<br/> TTGGTGCCTGTAAACAGAGGCTTGAGGACTACGGGAAAAG<br/> GAGGGAAAAGGAGATGCCCGCACCCGCCAGTTGGGC<br/> TCCAAATCCCTGTGCTCGTAGTCCGACTAAGGGGCGGGAGAA<br/> CGAGAGATGGGAGGCTTTCTGGGGTTCCTAGGGGCCGGCTCG<br/> GCTCTGGCCGCTGCCTGGAGGAGGAATACCAGTTTCGATT<br/> CCCTGGAGACGGGAGGAGTTCCCATCCCTGACTCAGGCTGA<br/> CCCCCTCCCCTTCCATATGCTGAGTCATCGGCTCGAGGGC<br/> CAGGGCGCTTCGGATTGGGAGATTCTCAAGAGAGACTGGAAG<br/> GGGCTTTGCGCGCCGAAGGACTGAGCACCCGTCTAAACACTA<br/> ACAGGGGCGGGGTACTAAGAGCCCCGACCTTGCCCTCCT<br/> TGCTTAGATCAAGGGGTTCCGGTTTCCAAGCCGCTCCTCGC<br/> TCAGACCCAGGAGACCCGGTTCCAGGCCGTGGCTTACCAG<br/> ACTCAGGAGTCTGGTTCCAGCCACCCTGTCTCTCAAACGC<br/> AGGAGTCCGAGCCCCCGCCCCGCCGCCCAACCCCTC<br/> TCTCCGATTGAGGAGCCAGGCTCCCATCCCCTCTCCACCCC<br/> GTCCAGGCTCAGGAGTCCAGCTCAGGAGGAAGTTCAGGGC</p> |

|                |      |      |          |       |    |                                                                                                                                                                                                                                                                                                                                                                                                                                                                                                                                                                                                                                                                                                                                                                                                                                                                                                                                                                                                                                                                                                                                                                                     |
|----------------|------|------|----------|-------|----|-------------------------------------------------------------------------------------------------------------------------------------------------------------------------------------------------------------------------------------------------------------------------------------------------------------------------------------------------------------------------------------------------------------------------------------------------------------------------------------------------------------------------------------------------------------------------------------------------------------------------------------------------------------------------------------------------------------------------------------------------------------------------------------------------------------------------------------------------------------------------------------------------------------------------------------------------------------------------------------------------------------------------------------------------------------------------------------------------------------------------------------------------------------------------------------|
| MSTRG.9283.3   | 0    | 0.19 | 4.95E-05 | 5.681 | up | GGAGCGGGCCGGGTTCCGCGAGCCGGCAGCCCTGCGTGGCTG<br>ACAGGCCCGGCTTCCCCGCTTGGCCGCCAGAGTCCGTGCGGG<br>CGACGCGGTTGCCCTCTCCGGGCCAGAGAGTTGGGGACGCC<br>CTTCCCCGCCCCGGCGCCCTAGCGCCCCAGCGCCCCCGG<br>GGTCGGCGCCAGAGACCTGGCGGCCCGGAGGCTCTGACTTGA<br>GGCGGCGAGGCGGGCTCTGGGGCCTCCCGAGCCAGGCCGAG<br>TTAGTCTGAGGAAGCGACGGCGGGGACGCGGGTCAGGGCC<br>AAGGAATCGGGGACCCCAACCGGACAGGCGCTTTCTTCCCCT<br>CCCCCTCCCTCCGCCCCAGTCCCAGCCCCGCCCCAAGTTGCC<br>TGTATCCGGTAGGACTGACCGTCTGCCCCGCCCTTACTCTGCT<br>GCCAACCTTGCCCGAAATCTAGACCCCAGATCCGGATCTCC<br>TGATGTCCATTGTCTTTTCTTTCTTTCCATGTACAGCTCTC<br>CAACTGCACAATGAACTCCTAAGGGCACGGATTGAATTTTCAT<br>TCTTTTTGTTCCCTGGACTGTATGAACTGAAGTAGCAAGTAT<br>ATTCATTGGAATAATCAAGATACATGAAAAATAGTGGAAT<br>ATAGTGATTTTGCAGAGAAGGCAATGGCACCCCACTCCAGTA<br>CTCTTGTCTGGAAAAATCATGGATGGAGGAGCCTGGTAGGC<br>TGCAGTCCGTGGGGTCACTAAGAGTCGGACACGACTGAGTGA<br>CTCACTTTCACTCTTCACTTTTCATGCATTGGAGAAGGAAAT<br>GGCAACCCCACTCCAGTGTCTTGCCTGGAGAATCCCAGGGAC<br>GGGGGAGCCTGGTGGGCTGCCGTCTATGAGGTCGCACAGAGT<br>TGGACACGACTGAAATGACTTAGCAGCAGCAGCAGCAGCATA<br>GTGATTTTAAAAATCTTCATTGAATTTAAAAATACTTTAA<br>AAATCTTCAAAGCTACAGAAAACAGTATGGAAATAATGTAAC<br>AAACATGCATGTAGCCAGCCTACTGATGTAACAGTTGTTGAC      |
| MSTRG.168210.6 | 0.01 | 0.43 | 4.48E-05 | 5.599 | up | GAAAACGACGTTTTTCCAGTCTTGTGGCCACTGCTGAGTTT<br>TCCAAATTTGTTGGCATATTGAGTGCAGCACTTTCACAGCAT<br>CTTCTTTTAGGATTTGAAATAGCTCAGCTGGAATTCATCAC<br>CTCCACTAGCTTTGTTTGTACTGATGCTTCCCTAAGGCCAGA<br>TGACTTCACACTACAGGATGTCTGACTGTTGTTGCTTAGGTC<br>CTTTTATTACCATGCTGTGAAGAAGCCTAAAGTAGCCTACTG<br>TAGATGAAAGTCTATCCATGATGGGAGAGTAGAGGTTACCCA<br>CTGACAACCAGAACCATGTTCCAGAGGCCATCTGGGACCTAC<br>AGATTGAGAGTACATCATGCAGAATACCAGGCTGGATAAATC<br>ACAAGCTGGAATCAAGTTTCCCGGAGATATATCAATAACCT<br>CGGATATTGAGATGACACCACCTTTATGGCAGAAAGTGAAGA<br>GGAACATAAGAGCCTCTTGATGAAAGTGAAGAGGAGAGTGA<br>AAAAGTTGGCTTAAAACTCAACATTCAGAAAATAAGTTCATG<br>GCATCCGGTCCCATCACTTCATTGCAAATAGACGGGGAAATA<br>ATGGAACCTGTGAGAGACTTTGTTTTGGGGGGCTCCAAAGTC<br>ACTGCAGATGGTGATTGCAGTTATGAAATTAAGGATGCTTG<br>CTCCTTGAAGAAAAGCAATAACCAACCTAGACAGCATATTA<br>AAAAGCAGAGACATTACTTTGCCAACAAAAGTCCATCTAGTT<br>AAAGTTATGGTTTTTCCAGTAGTCATGTATGGATGTGAGAGT<br>TGAACCATGAAGAAATCTGAGCGCCGAAGAATTGGTGCTTTT<br>GAACTGCGGTGTTGGAGAGGACTCCTGAGAGTCCCTTGACT<br>GCAAGGAGATTCAACCAGTCCATCCTAAAGGAAATAAGTCCT<br>GAATATTCATTGGGAGGACTGATGCCAAAGCTGAAGCTCCAA<br>ATTTTTGGCCACCCGATGAAAACAACACTGACTCATTGAAAAG<br>ACCGTGATGCTGGGAAAGATTGAAGGCAGGAGAGAAGGGGA |

|                 |      |      |         |       |    |                                                                                                                                                                                                                                                                                                                                                                                                                                                                                                                                                                                                                                                                                                                                                                                                                                                                                                                                                                                                                                                                                                                                                                                                                                    |
|-----------------|------|------|---------|-------|----|------------------------------------------------------------------------------------------------------------------------------------------------------------------------------------------------------------------------------------------------------------------------------------------------------------------------------------------------------------------------------------------------------------------------------------------------------------------------------------------------------------------------------------------------------------------------------------------------------------------------------------------------------------------------------------------------------------------------------------------------------------------------------------------------------------------------------------------------------------------------------------------------------------------------------------------------------------------------------------------------------------------------------------------------------------------------------------------------------------------------------------------------------------------------------------------------------------------------------------|
| MSTRG.135318.19 | 0.01 | 0.22 | 0.00035 | 5.438 | up | <p>CAGTCGTGTCCAACCTTGTCAACAACCCCATGGACTGCAGCCCA<br/> TCAGGCTCCTCCGTCCATGGGATTTTCCAGGCAGGAGCACTG<br/> GAGTGGGGTGCCATTGCCTTCTCCCCTGTGCCATGGGATTT<br/> TCCAGGCAGGAGTACTGGAGTGGGGTGCCATTGCCTTCTCCC<br/> CTCCGTCCATGGGATTTTCCAGGCAGGAGTACTGGAGTGGGG<br/> TGCCATTGCCTTCTCCGGGTGCATACCCCTAGGCCAACTGAAA<br/> TCAAAGCTTTGGGTGGGTGCCATTTCCCTTCTCCAATGCATG<br/> AAAGTGAAGAGTGAAGTGAAGTCACTCAGTCGTGTCCGACT<br/> CTTTGCGACCCCATGGACTGCAGCCTACCAGGCTCCTCCGTC<br/> CATGGGATTTTCCAGGCAAGAGTACTGGAGTGGGGTGCCATT<br/> GCTTTCTCCATCTGGCAGGTGGGTCTTTACCACTAGCGCCA<br/> CCCAGGAAGCCCAAAACTTCAACTACCATCATCCACAAGAAA<br/> TTCTGATTTAGCAATTGAGAATTGGTAATGAAATCAAACAC<br/> CTTCTTTGGGAATCTGATTTAATATTTTGTATTGAAAAATG<br/> TGAGTTTATATGCATTGAAGTGATATGCTTAGAGATATTAC<br/> TTTACAGATTTTCTGTGATCTTTCCTGTGGAAGTGCATAG<br/> ATTACATGTTATTTTCTAAAAATGGCAAGTATCTGTTCACTG<br/> TTCTTTGTTGGCTATGCTAAGTTAACTTTTAAGTGAACCA<br/> TCCAGCTGTTTTAATTTTATTTTGCAGAGTGTGTTAATG<br/> ATAACAGCTTTTATTAAGTCCTTATATATGGCGTTGCCCTGA<br/> TCCCTCTCCTCTTATTAGTTCCTTCTTTTCTTTTACAAGCAT<br/> AGCTACAATTTAGCTTATCTTGGTCCACCACTGAGCTTTTA<br/> TTGTTTAGGGCTAGAGTCTGCCATGTATTGATACTCTCAAGG<br/> CTCTCTTTTTTCTGTCTACCATCAATAGTGTGATTTTGT<br/> CTCTCACAGGTTTAAAAAAATTTTTTTTTTAAGAAGAAAAA</p> |
| MSTRG.133391.2  | 0.22 | 10.9 | 0.00505 | 5.415 | up | <p>CGACGTCGGGGCGTGGCCCGTGGGGCGTCCCGTGCCTCG<br/> CCCGCTCACCCTTCCAGGTACCTAGCGCGTCCCGGCGCG<br/> GAGGTTTAAAGACCCCTGGGGGGGGGGTGTGCGCCGTCG<br/> CCTTGGGGTTCGGGGCGGTGCGGCCCGGGGAGTAGTCGGG<br/> AGCTGCCTCCCGTCTCCCCCAGACCCCGCGTCCCCGAGG<br/> GGACGGGGTGGCGCGCGCGTGGCGGCCACGGTCACTGCCG<br/> CCGCGGCCGTGCGGAGGGGGTACCCGACGGCCGTGCTGTGG<br/> GCCGTGGCCGTGTGCGGCGCGCGTGCAGCGCTGCCCGCG<br/> TCCCTGGGGGAGGGTTGGGGGCCCCCGGGCGCTGTGGGGT<br/> TGTCCGAGCCCGCTGCGGGCTTGGCGCCGACGCCCGTCT<br/> GTGTGGAACCTTTCCCGACCCCTCCGTTCTGCTGTTTTCTGT<br/> CTGACTTGGCCGCCAGAGGCAACCCCTGCCCAACTCCCA<br/> CCTCCGGGAGGGAGGCGGGGTGGGTGGGATGTGCC</p>                                                                                                                                                                                                                                                                                                                                                                                                                                                                                                                                                                                                                     |
| MSTRG.157991.6  | 0    | 0.16 | 0.00275 | 4.495 | up | <p>AATCGCTCGTGTACGAGGGCACTGGGAACGCGCCCGTCCTA<br/> CCCCACCCTGTCCAGGATGGAAGGAAACGAAGAAAGCCACGA<br/> GAAAAACTGCCCTGCCCTCCCTCGTCTCTGCTCTAGCAGGAG<br/> GGGACCAGGAGATGGCAAGGCTCGGCTGGGCGCTTACCAGC<br/> GCCACACCTCCCTACTCCCTTTCCAAAGATGAGTTGCGCTGG<br/> GGAGCCCCAGTCCCAAAGACAAACGATTTCTTCTTAAAAAT<br/> CTTAGCCAGAAACTTCCCCTCTGTACCAGTGCACAAGCG<br/> AGTCGTTTGGCTGTGCGACGTGACCACTGATTCAAGAGTCTC<br/> TCCGGCATCCCCTCTCTGCCCTATGTTCTGCCCCACCGCC<br/> CCCTCTCAGGCCCTCCTCAGTTTCCCCTAGAGACCCTCTAG<br/> GGCCCTGCTGAGCTCGGCCCTCCCTTCGGCGACTTCTTGAGA<br/> TGACTTCTGCAGCGCTGTGTACCCAGGTCTGCGCTCGGCGAT<br/> TCGGACTGGAGACGCTGCGGGCGGATACCTGGAGGCAAGGC<br/> AGGGAGGATGGTTCCCCGGGAGGGTGTGCTCACTAGGGG<br/> ATGAGAGATCAATAAAAGAAGCCGATTGAGG</p>                                                                                                                                                                                                                                                                                                                                                                                                                                                                                                          |

|                |      |      |         |       |    |                                                                                                                                                                                                                                                                                                                                                                                                                                                                                                                                                                                                                                                                                                                                                                                                                                                                                                                                                                                                                                                                                                                                                                                                                                |
|----------------|------|------|---------|-------|----|--------------------------------------------------------------------------------------------------------------------------------------------------------------------------------------------------------------------------------------------------------------------------------------------------------------------------------------------------------------------------------------------------------------------------------------------------------------------------------------------------------------------------------------------------------------------------------------------------------------------------------------------------------------------------------------------------------------------------------------------------------------------------------------------------------------------------------------------------------------------------------------------------------------------------------------------------------------------------------------------------------------------------------------------------------------------------------------------------------------------------------------------------------------------------------------------------------------------------------|
| MSTRG.40315.3  | 0.01 | 0.18 | 0.04463 | 4.487 | up | <p>GTTACTTTCCACAGTAGATACTATATTTAATTCAGAGCTTGT<br/> GAGAGCCTGGAACATTGCAGTAGATTGAATGACTTTTAACT<br/> GGGAAATCGAAGGTCCGTGTTCTTTGGAAGCAAGGGTCATAG<br/> TCAAGGTGGAATGAGGACACAGTTGGCAGGCGTCAAGGCCA<br/> CCCCAGCGCACAAATGACCTGACAGTCCCTGGGGACTTCAGA<br/> GAGCCACCCTGATGTTTCTCCTAACCATAGATTTTAACTGG<br/> TTTTCTTCTTTTTTACCTGAGAAATTGTGATTGGCTGTCAA<br/> CACCCCATCTGCATCCCCAGCATATTCTTGTGGTTG<br/> GTTGGTTTTGTTTACTGAGATAGTCACCCCTCTAAAGTGT<br/> CAGTTCAGTGGTTTTTAATATATTACAAAAGTTGTGCAGCCG<br/> TCGTCAGTGTGCAGCCATCACCTCCAGAAAAGAACCCCATGC<br/> CTCACCTGTGCTCGTACCACCTAGCACTCCTCCAGCCTGT<br/> GAGCCCCGGCAGTACCTGTCTGTGGATGTGCCTCTTCTGTA<br/> CATATGACATAAATGCATTCATGCAACATGTAACCTTCTGTG<br/> TCTGGCTTCTTTCGCTCAGTGTAGTGTCTGGGAAGATT<br/> GAGGGCAGAAGGAGAAGGCCTCGGAAGAGGATGAGTTAGGCG<br/> GTTGGCATCACCAACTCACTGGACGTGAGTTTGAGCAAACCTC<br/> TGGAAGATGGTGAAGGACAGGGGAGCCTGGTGTGCTGCAGTC<br/> CATGGGGTCACAGAGAGTCTGACATGATTAAGTACTGTAC<br/> AACGTTTTCCAAGGGTACCATATTATCGTCTTCCCTCAGTAT<br/> TTCGTTCTTTTGTGGCTGGGTAGTATTCCATTGTATAGACA<br/> GACTACAGTTTATTTGTTTCATCAGTTGATGGACATTTAGATT<br/> GTTTTGACTGACATGAATAGGGCTGCGGTGAACATTCACATA<br/> CAAGTGTGTGCGAACATGATTTTTAGTCTCTTGGACTA<br/> AAAGGAGTAGAATTGCTGGGTCTACGGTAATTCTGTGTTTA</p>       |
| MSTRG.174668.3 | 0.01 | 0.12 | 0.0257  | 4.303 | up | <p>CATTGCTCCAAAATAGCTTGTTTAATATTTGCAGAGTGGTTC<br/> AGGTCTTTTCTCTCTCTGCTCTCAAAAAGATGCTATTCCCT<br/> GTGATAAAACCATTACAGTCTTCCAAGTTATACATGACTT<br/> TCAGGCTTCAGCCTCCATAGCAGCAGTCTGCCAGGAGACCA<br/> GTACAAGGACCAGAAGTACTGAGGATGAGCAAGGAATCTCACCAG<br/> ACAGAAGGTGTCTGAATAAATACACGGATGCTCTGTATACCT<br/> AGTCAAAACTACAGCTCACCTATAGGGAGCGGTATCTACTAT<br/> ATCTACGGGGTGGCTAGCAGATTATGTGGACCAAACCTGGACT<br/> TCACCAATAAGTAGTCATTTTAAGACTTCTTGAATGGGGTT<br/> TCTCAGAATTACTTATTGTATGCCACTGCCTTGGCTGTGAGA<br/> GACAGGAAGAAAAAGAAGAGACCATCGTGAGAAACGTCTCG<br/> AGACCACCTGTGGCCAGTGTGAATGGGGTACATCCGTGGCC<br/> ACAAGGATGCTGTTTTGTAGTACCTGAGGACTCACTCACGTC<br/> CCTGTGCACTATGGTTCCTAATGCTTGACTTTCCTCTTCTT<br/> TCATTCTACTAACCAGATGTGTCACTTTACTCCAGAT<br/> AACCAGTTGAATATGCTGCTCATATCAATAATCTATACAA<br/> ACCAAGAAGCTGTGAGATGAATAATACACAGCAAACAATAC<br/> AACAGAGTAATCTCTTTTAGCACTGTATCTACAGAATGTCA<br/> TTTCTCTAAGCCATATGAGCAGAACTGGCTTTTTATACAAT<br/> TAATGGTCCAGAACCAGATGAGAATTTCTAACTAAAAATGCT<br/> GGAACATTTTCTATCTTCTCTCAACCATAACTCTCACTGAAA<br/> TCTATTGCACTGGTGATATACTGTGGATCTGAACAACACA<br/> GAGTTCACAGGCTCAGAGACTGATACACAGGACACACAAAG<br/> TCGTGAATTACTCAGAGAAATCCGAGGAAAGAATTGCTCCC<br/> AAGGAAGTATAATTTAAATCTTTCATTATAACCTATCAAAA</p> |

|                 |      |      |         |       |    |                                                                                                                                                                                                                                                                                                                                                                                                                                                                                                                                                                                                                                                                                                                                                                                                                                                                                                                                                                                                                                                                                                                                                                                                                                     |
|-----------------|------|------|---------|-------|----|-------------------------------------------------------------------------------------------------------------------------------------------------------------------------------------------------------------------------------------------------------------------------------------------------------------------------------------------------------------------------------------------------------------------------------------------------------------------------------------------------------------------------------------------------------------------------------------------------------------------------------------------------------------------------------------------------------------------------------------------------------------------------------------------------------------------------------------------------------------------------------------------------------------------------------------------------------------------------------------------------------------------------------------------------------------------------------------------------------------------------------------------------------------------------------------------------------------------------------------|
| MSTRG.196420.13 | 0.02 | 0.3  | 0.03121 | 4.253 | up | <p>CTCGTGTCTTCGGTTCTCGTGATCTGGCCGTTTCGTCCGTT<br/> TTCAGAGAGAGGGCCGGTGAAAAATTTTTGTGTGTGC<br/> CGGTGAAATTTAATCAAGGAGTCCCTTTCTGCCGGCCTTGTA<br/> CAAGAGAATTTTACTTATACAAGAGACTTTTGCTTTCGTGAG<br/> CGGCATTGAGACAGAAAAGCCTGGCGGGCTACAGTCCATGGG<br/> GTCACAAAGAATTGGACACGACTGAGCGACTAATACACAAGG<br/> CTGAATAATATTCAATTCCTGTGGGATCTAGTTCCTGACC<br/> TGGAGTCCAACCCACGCCCTCTGGAAGCGTGGAGTCTTAACC<br/> ACCGGATTGCCAGGAAAGTCCCTCAATATGGTTCATGTTTGC<br/> ATTTCCCTAATGATTAGTGATGTCAAGCATCTTTTTGTGTGC<br/> TACTGGCCATTTATGTATTTTCTTTGGAGAAGTATTCATTG<br/> AAGGCTTTTTCTCACAGTCATTTTTAACACGTACATATATT<br/> TTATAAGCTTCCCAGTGGTAAAGAATACACCTGCAGTGCAGG<br/> AGTTGCAGGTTTGCAATGCAGGAGACTTGGGTTTGATCCCTG<br/> GATTGGGAAGTCCCCTGGAGGAGGGAATGGCAACCCACTCC<br/> AGTATTCTTGTCTGGAGAATTCATGGACAGAGGAGCCTGGT<br/> GGGCTATAGTCCCTGGGGTCCAAGGAATTGGACGTGGCTGAG<br/> CCACTGAGCATATACATATATTATAGATTATGTAAACGTATT<br/> GAATACTTCAAGATCTATGTCAGTTTTTTGGTTTTAAAGGCC<br/> ATAATCATATCCCACATACAAATATCTGGTCATTCTTTAGCC<br/> CCTTGCTATACTCTAATGGATATTTGGTTTGTCCAGTTTT<br/> TACCCATTATAAACAGTTTGTACAATAGTAAACAAGCTTGAA<br/> TACACACACACATCTATTTATCTGTCTATATCTGCACAGTTG<br/> CCAAGGTTTCTCTTAGCTACAGTCTGCAAGTTGCTAGTTGA<br/> AGGCATGGGGATATTTAAAAATTTTATACACATAAAATTCGAA</p> |
| MSTRG.67057.2   | 0.15 | 2.42 | 0.00541 | 4.179 | up | <p>GCCATCTCGGTCTTTCGTGGCTGCGAGCCGGGTGTTCTCCGT<br/> TTTTGTATGCTGCTAAGAAACGCGGCAGGCATGACTCCAGTG<br/> TGGATTTTGATGGCTTCTGGTGGGCAGTTGTGTACCAGAAGG<br/> ATGACAACACTGCTGTGGTCTTAAAGCTCAAGCTTGATGCT<br/> CTATCTATGAGCAGACAGCCATTAAGCAGACTTGACTGGAAG<br/> TTGAAGAGGCATTTTAAAAATTTGTGGGGCGAAAATTTGTCT<br/> TTGGCTATAGAAAACCACTCTTTTATTTCTTAGGTGAACCTG<br/> AATCCTTGACCTGTCAAAAAGCAGTTGGCCTTTTTGATGATGG<br/> CTACATGTTTTTTTCTATGGATGACTTCTTTGGGGTGTGAAG<br/> AGAGGTAGAGACTACGTCCATGCAAGGAACCAAGAGTTCTAA<br/> CCAAAGGCAGATGTTTTGTTGTCCTGAAGATTTCAAGGGCAT<br/> TTATGATACCAGTCAGATAGAACAGGCAGCCTGATGGATGCA<br/> CATGGGATAGAAGAGCAAACAGCTATTAATTGACTGCTGCTC<br/> TGCACAGCTTTTGGGATCCTAGCTTCTGACAAGGGATCAAA<br/> CCTGTGACTGCTGCAGTGAAGCTCAGCGTAACCATTGGAC<br/> CCCAGGAAATTCTCCAGCTTTCTATTTTAAATAATGTTTATA</p>                                                                                                                                                                                                                                                                                                                                                                                                                                      |

|                 |      |      |         |       |    |                                                                                                                                                                                                                                                                                                                                                                                                                                                                                                                                                                                                                                                                                                                                                                                                                                                                                                                                                                                                                                                                                                                                                                                                                                               |
|-----------------|------|------|---------|-------|----|-----------------------------------------------------------------------------------------------------------------------------------------------------------------------------------------------------------------------------------------------------------------------------------------------------------------------------------------------------------------------------------------------------------------------------------------------------------------------------------------------------------------------------------------------------------------------------------------------------------------------------------------------------------------------------------------------------------------------------------------------------------------------------------------------------------------------------------------------------------------------------------------------------------------------------------------------------------------------------------------------------------------------------------------------------------------------------------------------------------------------------------------------------------------------------------------------------------------------------------------------|
| MSTRG.231934.33 | 0.03 | 0.48 | 0.0205  | 3.769 | up | <p>TGGATTTAACGCGAGGGGGAGAGGGGCGCATGCGTATTTCAA<br/> GCGAAATGACGCGAGGAGGCGCGCAGCGTACGCGTAATTAAG<br/> ATTGCAAAATGGCGAGGGGGGAGGTGACACAAACTTGATCA<br/> GAAACCATGCCACAGGTGAAGAGGTATATTGAGCCCTGCCTG<br/> GCCAGTGAGGTTACTAGAGAATTGGAAGAGGCTCAAGTCAGC<br/> ATCCTGCACATGGTTATCAAACCATTGTGAAGTCTTATCACC<br/> TGGGATACTTGTAAAAATGCAGATTCTTGGGCAGCTAGAAA<br/> CCTTGCTCACTGGTCAAGAGCAACAAGTAACAAGACCTACTTG<br/> TCACTTATCCTGAGGCATCGTGCCAGTGGGTTTACCAGCAA<br/> ACCAGAATAAAGCATCATTGCCCTGGATGTCCTTGTGAGATG<br/> GTTGGGAAGTCTTGGCTGAACTGTGGAGAATATCTTTGAAAA<br/> GTGTTTTAGAGAGTCTACCAGATTGGCCATGTGAGTGCCTGT<br/> GCAGCAGAAGAGTGGGTCTTCTCAGTGGTTAAGGTAACAAAG<br/> TGATTAAGGTAAGTGAAGGAGGAAAGATTGACATTGTCTTGA<br/> CTCCTATTAGGGAGGCTTGTAGGAATGTCATTTCTAGGGGCC<br/> AGTAATTTTAAAGCCTGTAGTTTATTCTACAATATATCCTTC<br/> TCAAAAACAGTTGGGGTAGGTTATATGCTTACCCAGTCTGAGA<br/> TCACCCCTGCAGAGGATCAGAAGAATTGAAATGGTTCCTAAG<br/> TAAACTAGGTGGCATAAGCTGCATGTCATAAATAATCTCAGC<br/> ATGCACTGATTACAGTCCCTTTGGTGAGAGTCTATTCTTTCA<br/> AACCAGACTTATTGAGAGTTTTTCTTTATCAGCCTATGGAGC<br/> TGCATACATCTTGTCAAAGCCAGCTCATTAGCAGAAGCTTA<br/> TTATTTAAGCAGCAGACAAGAATATAACACTTTGAATTAGTA<br/> ATTTAGAGGTAGCAGCATCTTTTAGTATAATCCATTTAAAC<br/> TGGACTAGCATTCTTTTTGGCTTCTCAGGCATTGACCCCTT</p> |
| MSTRG.216124.1  | 0.01 | 0.17 | 0.00535 | 3.602 | up | <p>TTTTGTTTCCAGGAGCCCTCAAGTAGCCAGGCCCTCCAGCTC<br/> TGGAATATCCTCTACTTGGGTTCCCTTTGTATTAGCTATAG<br/> TATTTGGTATTTTCAAGAAAACCCTCCTTCCCACTTTATACCA<br/> GCAGGCAGAGGAACCCATTGATGGGGCTCGGAAGTTGCCTGA<br/> AGGTATTTTATGATGTCCTAATAATCCGGAGCTGCCTGTTTA<br/> AGAATTTGTGAACTGCGATGGTCCTTTCCAAAAGAAGATTTG<br/> CTTAGGAAAATGCTAGTGTAACAAGATCTTCAGGGGAAGAA<br/> CTGTAAGCCTGAATGCCAGGCAGCAGTGGACATGAGTTCCCT<br/> ACTGGCCAGCTGTCAGCAGTAAAAGGGGCGGAACCCGGAGA<br/> GATCCCAGCAGGTGATGGAAGACCGCCTGTCAAGGACAGCAA<br/> GCCTTCTGTGGTCTCTGGTCAGGGATACTGGAGGCCTATTCTG<br/> CTCAGCCTGGAGATGTAGCCATCAGCAAAGGCAAGCATCGGT<br/> GAGCTGTGTATGCCCCAGCTTAGCACTCAGCATGCTCCACC<br/> CCAGGGTACGTGTGGCCAGAGTAGCAAGGGTCCCATTCTC<br/> TCATTCTTTTTGGTCATTTATCCATCCATCCAGAAGTGTTC<br/> ATTGAGTGCCTGATGTAGGTCGAGCACTGTACTAGATACCAG<br/> AGTGAATTAGACCACAGGACCCCTGCCCTGTGGGGTTCACTA<br/> GTAAACAAACAGGCAGGTTTCTAGTATATAGGATAAGTGCTC<br/> TGATGGTGAAATCCAGGGTTGGTAGAAGGCACCTCTTGTC</p>                                                                                                                                                                                                                                                                                                    |

|                |      |      |         |       |    |                                                                                                                                                                                                                                                                                                                                                                                                                                                                                                                                                                                                                                                                                                                                                                                                                                                                                                                                                                                                                                                                                                                                                                                                                                               |
|----------------|------|------|---------|-------|----|-----------------------------------------------------------------------------------------------------------------------------------------------------------------------------------------------------------------------------------------------------------------------------------------------------------------------------------------------------------------------------------------------------------------------------------------------------------------------------------------------------------------------------------------------------------------------------------------------------------------------------------------------------------------------------------------------------------------------------------------------------------------------------------------------------------------------------------------------------------------------------------------------------------------------------------------------------------------------------------------------------------------------------------------------------------------------------------------------------------------------------------------------------------------------------------------------------------------------------------------------|
| MSTRG.130001.2 | 0.08 | 0.81 | 0.01101 | 3.508 | up | <p>TTCCCGGTGACGTGCTCAGGACTCAGCAGACGGATTTCCCTGC<br/> GGGTCCGGCTGCATCTATTTCGAGGGGCGCCAGGAGTCCCTTC<br/> TGTTCTCCTCGGGCTCGGAAGTAGAAAGGATGGTGTCCGTGT<br/> GGAGGCGCTGTGTTTCGTGGGTGTGAGACGCGGATACGTCTG<br/> TGTGAGGATCACAAAGCCGACAGATTGGTGGCCTCTGTGGCG<br/> AGGTCGACCAGATGGCCCGACAGGTTGTTGGGGATTTTTGTT<br/> ACTATTTGTATTGTACTGTAGGTATTCAGTGAGAAATCTCGA<br/> AATTAATTATAATGAAAATCACCATTATCATTGTTACTCAAC<br/> AATAACGTAATTATTACCTTTGTTTGCAGTTAATTTAAGAAA<br/> CACTGTTTCAGGTTTATCCACAGAGTATCCAATTGAAGACGA<br/> CCAGAGAAGGATGTTGAAGTGAAGAACTTTCTTAACACACTG<br/> GGAAGTTGGGGAACCTCTCCTTCTAGCCACGAGGCCCTGCCC<br/> TGCAGCAACCGACCTGAAAAACCAGACCCAGCCCCTGCAGC<br/> AATGGGCTCCAGGATTCAGTGCCTGGCCAGAACTGACGATT<br/> ACACAACCTCAGTTTAAACTCTGTGAAAGAAAGTAAAGTTGCT<br/> TGGTCATGCCTGACTCTGCAACCCCATGGACTGTAGCCTACC<br/> AGGCTCCTTTGTCCATGGGATTTTCCAGGCAAGAGTACTGGA<br/> GTGGGTTGCTGTTTCCTTCTCCAGGGGATCTTCCAAGCCAG<br/> GGATCCAGCCCGGTCTCCACATTGTAGGCAGATGCTTTCC<br/> CATCTGAGCCACTTAAACTCTGTACTAGGGATCATATAACAA<br/> CAATGTATCCTGCTTGAGGACAGTTTCTCCTTCTGAAAACC<br/> TTCTGATTAATCCTGATATCTTAGAATGTATATTATGGGAAT<br/> AGGTCTGGTAGGATCTTCTGTAAATTTCTAATCCTCTTATC<br/> CTAAAATGCTAATTGTGGGAGTGGGTCTGGTAAACCTTTCAC<br/> AAACTTGAGACATTCTTTTGATTTAATGTAGAAAATAATTTA</p> |
| MSTRG.138781.2 | 0.01 | 0.18 | 0.00267 | 3.466 | up | <p>AACATTTGGGTGCATTTCTTCCACCTCGTCCACGTGAAGA<br/> TAAATGTTTGAACAGTTGGGATTGCACCAGGCGCCAGTGGGA<br/> GGGGTCCGGCCACCGTGAGCCTGCGGCAAGCGGCGCACCAT<br/> CGCCTACATGGAGGCGCTGTCCTGGCTGGGTTGCTGCCCCCA<br/> GAGCCGGGGCGTGAGGACCGCCTGCACCCAGGCTGTGGGAT<br/> CTGACACAGTCATCGTGTGGGTGACCTGCCTCCAGGCCAGGG<br/> TGTGTGAAACTCGAGCCCGTGGTGGGGCGTCTGTCCAGGGCG<br/> TGGGCTGGAGGCTCAGGCAGCACCAGCCAGAGTGTGGAAGCG<br/> CACAGGCTGCCCTCCCGACCTTGCTCTGGGGCCCCCTGTG<br/> GACAATGGGTTTGTTCCTTTCTAAGGTGGACTTTGCATTTT<br/> AAAATTTCTTTCAGTGTATACAAATTCACAAAACTTTTCT<br/> GCTACAAAAATTTTGTGAAAAGTAAGGCTTTCTGAGAGTGA<br/> AAATCCTCACGAGCTCTCCAGGGCCTGGGAGTCGTGTCTGC<br/> CCACGGGCGTGCCTGGCCCTGGCCTCCACCGGAGTAAGG<br/> CAAGAGGGTATGCGGTAATGTAAACGCTGAGGCTGCCGCCCC<br/> GATGCCCGGCCCGCCCCACGGGCAGCGGCTCTGTTAGTCG<br/> GCGGCTTTAGTGAGGGTGCCCCAACACGAAGCCCCCACACC<br/> TTCAAATGCACGACCCTGCTCTTGTCTTCCAGGCCCCCGGG<br/> CAGGCAGACAGCCTGGCACAGCCCTCCCTCCTAGCTCTGAAC<br/> TTCCTCAGTTCCCCCTTACAGGCAGGAGTTCATGGGCTGCAC<br/> TAGGCAGGGTCTGGCAGAAGTGAGGTTCTGGGGCTGGGAAAG<br/> GAGGCACCAGCTGGCCTGCTGCCCCCTAGGGACACCCCTCAC<br/> CCCAGGGTGGTCAGAGAGAGTCTCCCTTCAAGACCAGGAGTC<br/> CTGGTGCTGGGGGAGCAGAGCCCAGAGACGGGCTCAGGCAG<br/> CACCTCCTATAGACAGATGGGGGCTGCTCTTTGATGGGAA</p>                  |

|                 |      |      |         |       |    |                                                                                                                                                                                                                                                                                                                                                                                                                                                                                                                                                                                                                                                                                                                                                                                                                                                                                                                                                                                                                           |
|-----------------|------|------|---------|-------|----|---------------------------------------------------------------------------------------------------------------------------------------------------------------------------------------------------------------------------------------------------------------------------------------------------------------------------------------------------------------------------------------------------------------------------------------------------------------------------------------------------------------------------------------------------------------------------------------------------------------------------------------------------------------------------------------------------------------------------------------------------------------------------------------------------------------------------------------------------------------------------------------------------------------------------------------------------------------------------------------------------------------------------|
| MSTRG.141898.2  | 0.03 | 0.39 | 0.00185 | 3.427 | up | <p>GCTGCTTTAACCCCTTCCTGCCCTCCCGCCGCTCAGCCCTC<br/> AGCTGCTCTGGGAAGTCCAGCTGGGGGGATGGGGCGGTGGG<br/> GAAGAGTGGTAAAGAGGAAGCTGAAGTTTTGAAAAACACTC<br/> GCTGAAGACCCAGGTTTCATGGATGGAAGCGCCAGTTATCTGT<br/> GCGCCACAGGCAAAGCAGCCTCCCTTGGATAGCATGACAGGC<br/> CTAAAGACCTCACCACTTGGCTCCCAAACAACCTTTTCTGGG<br/> AACAGAATGCTGCTGCCTGTGTGATGCTGAATGGTGGAAAGA<br/> AAGCGGGAAGCAGCCAGATGTAGCGGGAGCTCCGTGGCACT<br/> CGTTTTCTCCCCATTCCGTCCCTGGACACGCTCCAACCCCAT<br/> CCGCCAGCTTTTGGGGGCCCGTCCGCGGCCCTGCCCCCTT<br/> CCCTCTGCTGCGGTTGTAACAGGTTTCATGGCTGTGCCCAGC<br/> CCTCGCAACCCAGACAGCCAGGCGCGGAGGGAGGGAGCCCC<br/> GGCAGGGCCCCACCGCGGGCTCCCAGGCCCTTTTAAGCGC<br/> CCCCGTCCCGTCCCGGCGCCCCCAGCCCCGATCCCCGGC<br/> GCCTCGCCACCCGACGCGCCCCGCTACCTCGGGAGGCGGC<br/> GCGGGTCTCAGTCCCGGAGGCGGATCGCAGGCGCAGGCAGCC<br/> CCACGGCCATGACTCCGCCCGCCCTCGGTCTGGCTTGGCAG<br/> ACCGTTGACGGATTAGCATCTATTTTTAAGCCATGACACGC</p>                                                                                                                                        |
| MSTRG.133381.13 | 0.08 | 0.84 | 0.00699 | 3.398 | up | <p>GTAGCATATGCTTGTCTCAAAGATTAAGCCATGCATGTCTAA<br/> GTACGCCCGCCGGTACAGTGAAGTGCGAATGGCTCATTAA<br/> ATCAGTTATGGTTCCCTTTGGTCGCTCGCTCCTCTCCTACTTG<br/> GATAACTGTGGTAATTCTAGAGCTAATACATGCCGACGGGCG<br/> CTGACCCCCTTCGCGGGGGGATGCGTGCATTTATCAGATCA<br/> AAACCAACCCGGTCAGCCTCCTCCCGCCCCGCGGGGGGC<br/> GGGCGCCGGCGGCTTTGGTACTCTAGATAACCTCGGGCCGA<br/> TCGCACGCCCCCGTGGCGGCGACGACCCATTGAAAGTCTG<br/> CCCTATCAACTTTCGATGGTAGTCGCTGTGCTACCATGGTG<br/> ACCACGGGTGACGGGAATCAGGGTTCGATTCCGGAGAGGGA<br/> GCCTGAGAAACGGTACCACATCCAAGGAAGCAGCAGGCGC<br/> GCAAATTACCCACTCCCGACCCGGGAGGTAGTGACGAAAAA<br/> TAACAATACAGGACTCTTCGAGGCCCTGTAATTGGAATGAG<br/> TCCACTTTAAATCCTTCCGCGAGGATCCATTGGAGGGCAAGT<br/> CTGGTGCCAGCAGCCGCGTAATTCCAGCTCCAATAGCGTAT<br/> ATTAAAGTTGCTGCAGTAAAAAGCTCGTAGTTGGATCTTGG<br/> GAGCGGGCGGGCGTCCGCCGCGAGGCGAGCCACCGCCCGTC<br/> CCCGCCCCTTGCCCTCGGCGCCCCCTCGATGCTCTTAGCTG<br/> AGTGTCCCGGGGGCCGAAGCGTTTACTTTGAAAAAATTAG<br/> AGTGTTCAAAGCAGGCCGAGCCGCCTGGATACCGCAGCTAG<br/> GAATAATGGAATAGGACCGGTTCTATTTGTTGGTTTTCG</p> |



|                |      |      |         |       |    |                                                                                                                                                                                                                                                                                                                                                                                                                                                                                                                                                                                                                                                                                                                                                                                                                                                                                                                                                                                                                                                                                                                                                                                       |
|----------------|------|------|---------|-------|----|---------------------------------------------------------------------------------------------------------------------------------------------------------------------------------------------------------------------------------------------------------------------------------------------------------------------------------------------------------------------------------------------------------------------------------------------------------------------------------------------------------------------------------------------------------------------------------------------------------------------------------------------------------------------------------------------------------------------------------------------------------------------------------------------------------------------------------------------------------------------------------------------------------------------------------------------------------------------------------------------------------------------------------------------------------------------------------------------------------------------------------------------------------------------------------------|
| MSTRG.110124.3 | 0.01 | 0.14 | 0.01903 | 3.346 | up | GGAGCAGTTGCGAAGTGAGGTTGGCCTGCGCGGGTGAAGCA<br>AACGTGACGTCAGCTTGTGGCCTTTGCTGCTAAGTCACTTCA<br>GTCATGTCCGACTCTGTGTGACCCCATAGACGGCAGCCCACC<br>AGGCTCCCCGTCCTGGGATTCTCCAGGCAAGAATACTGGA<br>GTGGGTTGCCATTTCTTCTCCAGCGCATGAAAGTGAAAGT<br>GAAAGTGAAGTCGCTCAGTCGTGTCCGACCCTTAGCGACCCC<br>ATGGACTGCAGCCTACCAGGCTCCTCCGTTTATGGGATTTTC<br>CAGGCAAGAGTACTGGAGTAGGGTGCCATTGCCTTCTCCTTG<br>TGGCGTTTGGTAAAGGCCAAACTTTACCAAAAAGTTTGTCACT<br>TCTGTAAAGGCAGAGCCACCTGTGTGAGGAGGACATCAGCAA<br>GCAGAGCTGAGAGTTCAGGAGAGATGGTTCCGGCTGACGTCC<br>TAAACTCCCAGTGCAGCCCTGGCGGACGCTTGTGGACTTA<br>GGGACCTGTCCACCTGTGGATGGCTACAGAAAAGGAAGAAATT<br>AACACTTCTTGGTCTGCCAGCTCTCCAAGTAAAGTCATATTC<br>TTTGCTCAAGACCTTGCTTTGATTTATTGGCCTGTCGTGG<br>GGTAAGCAGAGTGAGCTTGGACTCCATGATAATCCCACATGC<br>CTTGCAAGTCAAAAACCAAAAACATAAACAGAAGCAATATTGT<br>AACAAATTCATAAAAGACTTTGAAAATGGATCATATCAAAAA<br>GATCTGAAACCAAAAAGTAAAAGAACTCGGTGGTCTGTCTGA<br>AATATTTAGAAAAGAAAATGGTGCCCTCATGCCAGTACCCC<br>CTGAAGTCACACAGGGGACACAACCTAGGGGAGGTCCCTTAT<br>CTCGTCCAGGGGACTGTCATAACCAGCCACCATTTCTCCCTGC<br>CCATGATAAACACACTGTAACGAGGGTCATTGGCACCTGGGC<br>CAGTAATGCTGTGAACACCTGGATTCTTTGTCCTTGTGAGAT<br>TTGATGTGAAGATAACACAGAAAAGAGAACCAGCCAAGAAGGA |
| MSTRG.154624.1 | 0.02 | 0.26 | 0.00726 | 3.329 | up | GTCTCCCGTGGCGTGGAGAGGACTTTTGTCTTGAAGTGCCTG<br>TATCCGCTGTGTGGAAGGTCCAGGAAGGCTCGGGGATGCGGG<br>GAGTGAAGTGAGCATGTCTAAACAGTGTAGGCATATGAGGT<br>TGAGGTGGGGCGGGCAAAATGCGATGTTATGTATTTGAAAC<br>CAATATAATTGTAAAGGGGTGATGTCATGTTGATATTAGTA<br>GAATATACTCCCGATTTGTTGATGCTTATGCGATTTTCCCAA<br>ATGGGAATTGAGATACTGGGTGAATATGCATCGCGTTTCC<br>TTTGGTTTTTTCATGCATACAAAACAGACTTCATTGATTAA<br>TGTTAGCTTTCTATTTTATTTTATGCAATAAGGTGATTTAT<br>CAGTTATCACATAGGTGTGCAGCAGAAGTTTGTGCTACTGA<br>GAATGTTTTGTGTATGTAAGCTCCTGAGGTTGTAAGTGAAT<br>CAGATTTGCAGAGGAGCCAAGAGCCGTAATGTGACCAGTTTT<br>TTCATCTGACGGTGAGAGACTGCAAGTAAACCATTTTCCCTA<br>CTGGTTTTCTGTCCTTTAATCTAGGACGTTATTTCTTGAATC<br>GTCAGCTGACTTGCTTTCACATATTACCAAGTTGCTTCGTCC<br>TGGCCTAAACTGATTTAGTGGTGTCTGATTTTTTGAACCCCT<br>ATGAACCATAGCCTACGAGGCTGGTTTGTCCAAGAGATTTCT<br>CAAGCAGGAATACTGGAGTGGATTGTCATTTCTTTCTTCAGA<br>GAATTTTTCTCACCCAGGGTCAAGCTCGGATCTCTTTAAGT<br>CTTCTGCACTGTTTCCACCCAGACGCTGCAGACTGGCCTG<br>CAAAGGGGAAAGTGGAGTGTGTGTGTTTCTGCTCGCCAGTC<br>ATCTACAAGGCAACAGCCAAGACTTCCACTCACCTGCAGACC<br>CACACAGCCCACCTACTGCTCCACACAGAACCGCAAAGGGA<br>ACTTTGCCAGAACAAATGCCACTCCAGCAGCTTTGCGATTTG<br>GGTGAATCGGGTCTGGGACACTTCAGTAAAGGGTGGGAAC            |

|                |      |      |         |      |    |                                                                                                                                                                                                                                                                                                                                                                                                                                                                                                                                                                                                                                                                                                                                                                                                                                                                                                                                                                                                                                                                                                                                                                                                                                       |
|----------------|------|------|---------|------|----|---------------------------------------------------------------------------------------------------------------------------------------------------------------------------------------------------------------------------------------------------------------------------------------------------------------------------------------------------------------------------------------------------------------------------------------------------------------------------------------------------------------------------------------------------------------------------------------------------------------------------------------------------------------------------------------------------------------------------------------------------------------------------------------------------------------------------------------------------------------------------------------------------------------------------------------------------------------------------------------------------------------------------------------------------------------------------------------------------------------------------------------------------------------------------------------------------------------------------------------|
| MSTRG.221949.1 | 0.05 | 0.56 | 0.03399 | 3.19 | up | <p>GTCGGAACCTGGGAGCAGATCATAGCTGCTAGGTTAAGAAAT<br/> TGATTCTCCCGCAGAAAACAATGGATTTCGGTGTAGCGGAACT<br/> GTTACGTGGAGATGCTAAGGTAATTGTTGAGAGCTTAGTTTT<br/> AAGTTGAAGGAATAAACCTGTTGATTTACAGGTTGATCAACC<br/> TGTAAGATGATGCATCATTGAAAATTTTTTTTTTTTTTAA<br/> GATGCAAAGGTACATTTCAAAACACGCCGACAATATTGGCT<br/> GGAAAATGACTTGGTTAAAACCTGATGATCTTACCAGCATT<br/> TGCAGGTTGATGAATACTAATGAAGCTGTGGATGTCAGT<br/> CAGCTTCATTTAAATGAGGGTTGCTGTCTGCCTGCTGTCT<br/> GCCTGGTGTGCTGTGACATTTTGAAGGTGAAAACATTTCTGG<br/> CTAGTGCTGCGAGATTTACTTGTCTGTCTTATGAAAATCTGG<br/> TGATTGGGAAAACCTCCAATGGATGTGGGAAAGAAAGTTCAAG<br/> ATGAATTACATTTTTTACATTGGTTTGTAAATAGATTCTGAAC<br/> CAGCATCGAGTCTAGATAATGCATCCATAAGAGTCAAGGCAT<br/> TTCTGTTTGACCATGACACTGCTGTAGAATCATAACCTGTTA<br/> ATCAGTGTATTACTTTCTAACTATTTTGAATGGAAAATCTT<br/> TTCTAGTTATCTAGCCTTGAATTAATAATTTTGAATAGCC<br/> TTTGGTTCTTTGTCTGAATTGAGTTTAAAACCTGTGTGATTGT<br/> AATTACACCAAGTAAAAGTGTGTACTCTGCGGTGGAATCTT<br/> CAGTCAGGTTTCTAGGGAGAGATGATTTGGTTTGCAAGAAT<br/> AAGTAATGTGCAAAACATTAGCTTCAGAGTGTGGGGTGAGA<br/> GCAAAGTGGGAAAGATGGGACCTGTTAACAGTGAGGGAAGGT<br/> CACTGATAAAATCTGGGTAAAACCTGGTCAAGCATTGTATGG<br/> AATGGGTAGTGTCAATAATAGCATCTAATCTAACCAAGGTG<br/> GTTGGGCCCTGCTGCTCCTGCTAAGTCACTTCAGTCATGCTC</p> |
| MSTRG.43629.35 | 0.06 | 0.59 | 0.00234 | 3.15 | up | <p>CTCTGCAAGGACGCCTGGCTCCTAGGTCGAAGGGAAGGCGA<br/> GAGCTGAGCTGAGGCACCAGTCAGGTCTCCACACTCCCGCA<br/> GCCTGCTCCTTCCCGGGCGGAACGCTAGAAGCTGGGCAGGG<br/> CTTGGGGAGGCTCGCCAGCACAGAGCAGCCTCTCGGCCGGG<br/> GCTCTGTGCTATCGCGCCTGGGCGCAGAGCTGGAGCTCCGCC<br/> GGTGTGGAAGCTCACTCGGTCCATCCCAGTACAGGCTTGCAA<br/> GCACCCGCGGCAGCCAGCCTCTCTCTCCCGGTTCCGGCAT<br/> TGGGCTCCAAACCTGGGATCAAATAACTGCCCGGAGCTCACT<br/> GATCATGGGCTGGTCCCCTGCGCTGCGGCTGTGCTAGGGAG<br/> CCCAAACGCCAGGGGAAGCCCGCACAGACATCCACCTGCC<br/> TCTAGGCGGGAGGACAGCTCCAGGGAAGGCCCGGGCTGGCAG<br/> GCGCTTTCTGGGCACAAACGAGCAACTCTGGCTGTGGAG<br/> CTGCCTCCCCAAGCCAGGGGCACCGGACCCTGATTCCCTCC<br/> GTGCGGCGCTTAGTCTGGGCGGGGAAGCCCAGCTTGGGAAT<br/> GCAGCCTGGGGCGCTTCCTTTCCCTCGAAAAGAGCTCTCCCA<br/> GCGGGAGGCTTTGGCAGTGTGCACACCCCCAGCCCCTAAGCC<br/> CTCTGCAAGGACGCCTGGCTCCTAGGTCGAAGGGAAGGCGA<br/> GAGCTGAGCTGAGGCAGCAGTCAGGCACACTCACGGCTCCC<br/> ACACTCCCGCAGCCTGCTCCTTCCCGGGCGGAACGCTAGAA<br/> GCTGGGCAGGCCCTGGGGAGGCTCGCCAGCACAGAGCAGCC<br/> TCTCGGCCGGGGCTCTGTGCTATCGCGCCTGGGCGCAGAGCT<br/> GGAGCTCCCGGTTGTGGAAGCTCACTCGGTCTTCCCAGTA<br/> CAGGCTTGCAAGCACCCGCGGCAGCCAGCCTCTTCTCTCCC<br/> GCGTTCCGGGCATTGGGCTCCAAACCTGGGACCAAAGTA<br/> ACTGCCGAGCTCACTGATCATGGGCTGGTCCCCTGCGCTGCG</p>             |

|                |      |      |         |       |    |                                                                                                                                                                                                                                                                                                                                                                                                                                                                                                                                                                                                                                                                                                                                                                                                                                                                                                                                                                                                                                                                                                                                                                                                                              |
|----------------|------|------|---------|-------|----|------------------------------------------------------------------------------------------------------------------------------------------------------------------------------------------------------------------------------------------------------------------------------------------------------------------------------------------------------------------------------------------------------------------------------------------------------------------------------------------------------------------------------------------------------------------------------------------------------------------------------------------------------------------------------------------------------------------------------------------------------------------------------------------------------------------------------------------------------------------------------------------------------------------------------------------------------------------------------------------------------------------------------------------------------------------------------------------------------------------------------------------------------------------------------------------------------------------------------|
| MSTRG.202650.1 | 0.03 | 0.25 | 0.025   | 3.134 | up | <p>GCTATAAATGGCATTACTGTGCATAATATGACGAACTTTGAA<br/> TACTGATCTAACTAAACATACAGTAGAGGCATTTGGGAAGGA<br/> TGAGAGGATAGGAAAAGTGACTTAGAAGAGAAGGAAAGAGGA<br/> CTAAATCTTGGTCTTGTGTCCACAGTGAGAAGCCAACCAGAT<br/> CATGTTTAAAACCTGAAAAGAATCTGAAGTAACAGTACCAGAAG<br/> TTATTGAGAGACATAGAGGCTAAAAACATTCTAAAGTGGTGG<br/> GGAAAGGAAGAAGAATGCAAGCTAACTAATGTAAGAGAAG<br/> ACAGAATTAGAAAATCACCTGTTTGTAACTCCAGTGTAAATA<br/> GTTAACCACCAATGGATGCCAAAATCATGAGACAAAAGGGCTG<br/> GGGACACAGGATATCCACCTGCCACGGTACCTGTCCAGAGT<br/> CCTCGCTGGTTGTTTACAGGAAAAGCCGCCCTACAATGGGGC<br/> AGTCCTGCGGTTGCCACCACATGATCGGACTTTTAGCATCAC<br/> CGATCGCAGAGCACTGTGACATTTTGTGTTTCTAAAGAGGT<br/> AAGATACTCAGCATCAGTTGGGAAGTATCTTTGCTAAAAATA<br/> TCATTAAACTGAACCTGCCATTAGACCTAAATTCTAATTTAC<br/> CAGACACAGAAGAACAATGAAATAAACTATGAATAAACAG<br/> AAGAATTCAGTCACCAAAGAACAACAGTGCCCAAGGAAGAGT<br/> CAATGTCATGAAAAAAGACGCCTGTGTGGGTGTGGAGAGGGT<br/> TCTGTATTTTTAAAAGATTAAGAAACATAATAACCAATGCA<br/> ATTTGTATATTCTGACAAGATTTTGGTTGGGAAAAAAGCTGT<br/> AAGAGATATTTTTGTGAAGCTGGGAAAATTTGAATATAGACT<br/> GAATTTTAGCTGATACTTGGGGATTATTATTGCTTTTCTTAG<br/> GTGCAATAATGCAATTTTAGTCTGCTAGAAAAAATATTTTT<br/> AGAGGCTGAAGACTCTGAATGAAGTACTGGAGGTGACATGA</p>                                  |
| MSTRG.236907.1 | 0.01 | 0.1  | 0.00161 | 3.107 | up | <p>GCAGAGTGGCCTGTTGAAAGCCAGGGTCATTCCCCTCCATGG<br/> TCTTTCCCGAGCTCATTCACTTGCCTACTAGATACCCAGAA<br/> TCCTCCGTATCACAAATTGGTTTACCGGACGGCCTTCCGGG<br/> GGCCTGGAGAGCACACGGATGCTGGGATCTCACCATCAAAC<br/> ATTCTCACGGGAATAACCTAGAGTGTGGTGTGGGCTGTTGA<br/> ATTGGGTATGCAAGTCTGAGAACAGCTGGCTGAGAACTCACC<br/> CAGACACGGTGAGGAAGTGCAGATTCTGGTATGTTGACTGCC<br/> TGGGAGGCTGTGTGCTAGCATGTTTCACTTTTCCACTGG<br/> GAAGCCAGAGAGGATGGTGACAGGTAATAAATCCCAGTTCC<br/> TACTGACTCTGCTGGTCTGCAGAACACATTTCCGAATGGCAG<br/> GGACTTGGAGATCCTACCTTGTCTCTCTCTGTGGGGTCCC<br/> GTAGCGACATTCCTTTTCCCAGCCTGGGTCTCGGTTACCGA<br/> CAGTCATACCTCAGTGAAAAACCCATGCTCTCAGTACAAAGA<br/> TTCCACAAGCTTCGCCTGGCAATCTCCCCTTATCAATACC<br/> AGTCTTCAAACGTACACATCCACCCTCCGTCTTGTAGCCAG<br/> ACACCAAAGAAGTCCCAGAGTGGACTTCTTTGCCACCCCA<br/> CAATTATCCCCCTGTCTCAATCATTATCCATAGCCATGGTGA<br/> ACTAAACTCCTCCAGGAGGAGTAGACTATATCTCTTAAAA<br/> AGAATGAAGTAATGCCATCTGTAGCAACATGGGTGAACCTGG<br/> AGATTGTCCTACTGAGTGAAGTCAGTCAGATACAGAAAGAGA<br/> AGTATCATATGCCATGCTTTACATTTGGAATCGAAAAAGAAA<br/> TGATGATACAAATGAACGAACCTACAAAACAGACATTCCCAG<br/> ACTTGAGAGAATGATCTTATGGTGGTGACGGGAAGGATGGG<br/> AGGAAGGGATAGTATTGGGAAGGAACTCTGCTCAATACTCT<br/> GTAAATAACCTTATGAGGGAAGTTACCAGGGGGAAGGATGG</p> |

|               |      |      |         |       |    |                                                                                                                                                                                                                                                                                                                                                                                                                                                                                                                                                                                                                                                                                                                                                                                                                                                                                                                                                                                                                                                                                                                                                                                                                                            |
|---------------|------|------|---------|-------|----|--------------------------------------------------------------------------------------------------------------------------------------------------------------------------------------------------------------------------------------------------------------------------------------------------------------------------------------------------------------------------------------------------------------------------------------------------------------------------------------------------------------------------------------------------------------------------------------------------------------------------------------------------------------------------------------------------------------------------------------------------------------------------------------------------------------------------------------------------------------------------------------------------------------------------------------------------------------------------------------------------------------------------------------------------------------------------------------------------------------------------------------------------------------------------------------------------------------------------------------------|
| MSTRG.44275.1 | 0.01 | 0.16 | 0.00939 | 3.089 | up | <p>TTTATTTATATATTTGGCTGCTCTGGATCCTAGTTGCGGCAT<br/> GCAGGACCTTAGCTGTGGCATGTGGGATCTAGTCCCCAACCA<br/> GCGATCAAACCTGGGTGGAGTGCCCTGGGAGCTCTGAGTCCC<br/> GGTCACTGGATCACCAGGAAGTCCCTCTACGTGCTGTTTAT<br/> TGGATAAACTGTTGCCTGTTTCGTACAATGGCACACAACACAA<br/> CAACACAAAGAAAGAGGCTACCCTGAATGAGACAACCAGGA<br/> TGTCTTGCAAATATAATCTGTATGAAAGAAGCCAGCCACACA<br/> CACATACTGAATGACTCCACTGAAGTAAAAGACAGGAAGC<br/> TAGAAAAGAGGACACAGCCTCTCAAGAAAGTGAGCCTAGAAT<br/> TGTGCTCTGACCCAGCATCTCTGCCTCTGGGTATTTGCCGGA<br/> AGGAATAAAGGCAGGATCTTGAGGAGATGTTACAGAGTTCT<br/> TCATAACAGCATCACAAAAGGCAGAAAACAACCAGGGCCAG<br/> TGGCACCTCTGCTTTCTGTTTAGGGGGACGTCGAGCCAGG<br/> CCTGGAGGAGCCGAGGCCTTGATGATTTGAGGCAAGGCTCAG<br/> ATCGGCTCACTCGGCAGCTGAGTCCAGAGGACATGGTCAAG<br/> ACACCCCTCCCAAGAGGATCCGAGGGGACACCTGAGGCCTC<br/> AGGTGCCAGATACACAGGGATGGGAGAAGCAAGCCTGCTGG<br/> GGGATCCTGTAACCTCCTTTTCTGCTGTAACGAAGACGGGGA<br/> CTACCAGGCATGGAAGAACCACACCTGCCTGGACACACAGCC<br/> AAGAGCGAGAATCTGGCTCAGAGGCAGTGCTCTAAAGTCAC<br/> CAGCAAGGTCACCTCCTCCATGAAGCTGATTCACTCCCCTC<br/> CCTCCTGGGAAAGCTGAGTCCCTCACGCACCAAGGTTCTCA<br/> CTCAGCAGGACCGGCAGCCGGCCAGACGTCCCTCCCCTCCTG<br/> CCTGCAGACACTGGCAAAGATACCCGCTGTCCTGTGGCTGCT<br/> GGAGTTGGGGTAGCTGGGCAGACCCAGGGCCTGGGGGCCAG</p>        |
| MSTRG.33957.1 | 0.01 | 0.13 | 0.01954 | 3.075 | up | <p>CAGATATCTGATGGTTCATCTCTTTAAATAATGGGTAATTT<br/> GTTTTCTGTTGCCTGCAGGCAGAGTTATTAGAAGGTAGAGG<br/> GAAGCAAATTTCCATTTAAGATGGAAAAGAACTTGCCTATTT<br/> AGTTGACTATTGAAACTGCTGCCTTGCAAAGAAATGAACTTC<br/> TGGTCCCCGGAATTGTTTTAACCGGTGTTTTTAAGATGTAAG<br/> TTTTGTCTTTATTCAGGTATGGTGAGCAGGGGACTACTGCCA<br/> GTGAAAAAAGATAGTTTGTACTGTCCGAAGAGGAGAGGG<br/> CACGCCATGCCACACAGGGACCCACAGGACAGTTTTGCTGGA<br/> TATGGCTTCCCCAGTAGCTCAGATGGTGAAGAATCTGCCTGC<br/> GATGCAAAAAGACCCATGTTTGATCCCTGGGTCGGGAAGATCC<br/> TCTGGAGAATGAAATGAAAACCCACTCTAGTATTCTTGCTG<br/> GAGAATTCCATGGACAGAGGAGCTTGGCGGGCTACAGGCCAT<br/> GGGGATCCAAAGAGTCAGACATGATTGATAGACTAACACTAC<br/> AACTACTACTAATCCAATATGACTGGTGTTTTTAAAAAAGAG<br/> GAAATTGGGGGACAGACATGCATACTGAATGAAGACAGTCAT<br/> CTACAAGCCAAAGAGAAAAGCCTGGAAAAGATCCCTCCCTCA<br/> GGGCCCTCTCAGGAAGAACCAACTCCATCTTATTTACAGACTT<br/> CTGTCTCCAGAATTGTGAGATGATACATTTCTGTTGTTTTAA<br/> ACCACCCAGTCTGGGGTTTTTTGTTATAGGAGTCTTAACAAA<br/> TGGCCTCCCTGGTGGCTCAGTGGTAAAGAATCCACCTGCCAA<br/> TGCAGGAGACACGTTTCGATCCCTGGGAAGATCCCCTGGAGGA<br/> GGAAATGGCAACCCACTCCAGTATTCTGTTTGGGGAATGCC<br/> ATGGACAGAGAAGCCTGGTAGGCTACTGTCCATGGTTTCATA<br/> AACAGTTGGACATGACTGAGTGACTCAACAACAACAACAGAT<br/> TAACACAAATCTCAACTCGGCATGTTCAACTGTGCAATA</p> |

|                |      |      |         |       |    |                                                                                                                                                                                                                                                                                                                                                                                                                                                                                                                                                                                                                                                                                                                                                                                                                                                                                                                                                                                                                                                                                                                                                                                                                               |
|----------------|------|------|---------|-------|----|-------------------------------------------------------------------------------------------------------------------------------------------------------------------------------------------------------------------------------------------------------------------------------------------------------------------------------------------------------------------------------------------------------------------------------------------------------------------------------------------------------------------------------------------------------------------------------------------------------------------------------------------------------------------------------------------------------------------------------------------------------------------------------------------------------------------------------------------------------------------------------------------------------------------------------------------------------------------------------------------------------------------------------------------------------------------------------------------------------------------------------------------------------------------------------------------------------------------------------|
| MSTRG.121502.1 | 0.03 | 0.22 | 0.02414 | 3.053 | up | <p>CAGGCATACTCAGACTTGTTCAAACACAGGCTGGTGGTGTGG<br/> CAAGGATAAAAAGCAGAAATGATAAGGATTGGACTCCTGGACC<br/> TCCAGGAGGAGGAGACCTAACTCCTACAGTTCATCTGCTCCA<br/> CAAGCCTGGGTCTCCCGGAACCCCTGTGTCAGATTGCTGG<br/> GCCTCCCACCTACCTGGTGAAAACCTGGGAGAAGCAACAGTT<br/> TGTGTGATGGTGAGAAAACCTCATGTGAAGATGGCATTAAAGA<br/> AATTCTCATCACTCTGTGATCTGGGACAGGCAGAGTCTAGAT<br/> GGGAGCAATCACGAAGGGAGATGATGAGAGCTGAAGTCAGA<br/> ATATGCAAAATATAAGGACTTCCCTGGTCCAGTGGTCAAGAA<br/> TCTGCCTTCCAATGCAGGGGATGTGGGCTCAGTCCCTGGTTG<br/> GGGAAGCAAGATCCCACATGCCTCAGAGCAACTAAGCCTATA<br/> TGCTGCAACTACTGAGCCGCCAAATAAATAAATAAAAAAT</p>                                                                                                                                                                                                                                                                                                                                                                                                                                                                                                                                                                                                                                |
| MSTRG.43630.13 | 0.01 | 0.15 | 0.0061  | 3.043 | up | <p>AACCAGCCCATGATCAGTGAGCTCCGGGCAGTTACTTTGGTC<br/> CCAGGTTTGGAGCCCAATGCCCGAACGCGGGAGAGAAGAGG<br/> CTGGCTGCCGGCGGGTGCTTGCAAGCCTGTACTGGGAAGGAC<br/> CGAGTGAGTTCACACCGGCGGAGCTCCAGCTCTGCGCCCAG<br/> GCGCGATAGCACAGAGCCCCGCGGAGAGGCTGCTCTGTGCC<br/> GGGCGAGCCTCCCCAAGCCCTGCCAGCTTCTGGCGTTCGCG<br/> CCCGGAAGGAGCAGGCTGCGGGAGTGTGGGAGCCGTGAGTG<br/> GTGCTGACTGCTGCCTCAGCTCAGCTCTCGCCTTCCCTTCG<br/> GACCTAGGAGCCAGGCGTCCTTGAGAGGGCTTAGGGGCTGG<br/> GGGTGTGCACACTGCCAAAGCCTCCCGCGGGGAGAGCTCTTT<br/> CCGAGGGAAAGGAAGCGCCCAGGCTGCATTCCCAAGCTGGT<br/> GCTTCCCCGCCAGACTAAGCGCCGCACGGAGGGAATCAGGG<br/> TCCCGGTGACCCTGGCTTGGGGAGGCAGCTCCACAGCCAGAG<br/> TGTTGCTCCGTTTGTGCCAGAAAGCGCCTGCCAGACCGGGC<br/> CTCCCTGGAGCTGTCTCCCGCCTAGAGGCAGGTGAATGTG<br/> CTGTGGGGGATTCCCTGGGCGTTTGGGCTCCCTAGCAGAGC<br/> CGCAGCGCAGGGGAACCAGCCATGATCAGTGAGCTCCGGGC<br/> AGTTACTTTGGTCCCAGGTTGGGAGCCCAATGCCCGAACGC<br/> GGGAGAGAAGAGGCTGGCTGCCGGCGGGTGCTTGCAAGCCTG<br/> TACTGGGAAGGACCAAGTGAGTTCCACACCGGCGGAGCTCCA<br/> GCTCTGCGCCCAGGCGGATAGCACAGAGCCCCGCGGAGAG<br/> GCTGCTCTGTGCCGGGCGAGCCTCCCCAAGCCCTGCCAGCT<br/> TCTAGCGTTTCGCGCCCGGAAGGAGCAGGCTGCGGGAGTGTG<br/> GGAGCCGTGAGTGGTGCTGACTGCTGCCTCAGCTCAGCTCT<br/> CGCCTTCCCTTCGGACCTAGGAGCCAGGCGTCCTTGAGAGG</p> |

|                |      |      |         |       |    |                                                                                                                                                                                                                                                                                                                                                                                                                                                                                                                                                                                                                                                                                                                                                                                                                                                                                                                                                                                                                                                                                                                                                                                                                                      |
|----------------|------|------|---------|-------|----|--------------------------------------------------------------------------------------------------------------------------------------------------------------------------------------------------------------------------------------------------------------------------------------------------------------------------------------------------------------------------------------------------------------------------------------------------------------------------------------------------------------------------------------------------------------------------------------------------------------------------------------------------------------------------------------------------------------------------------------------------------------------------------------------------------------------------------------------------------------------------------------------------------------------------------------------------------------------------------------------------------------------------------------------------------------------------------------------------------------------------------------------------------------------------------------------------------------------------------------|
| MSTRG.148893.4 | 0.08 | 0.73 | 0.01047 | 3.019 | up | <p>GTACAGGCTTGCAAGCACCCGCCGGCAGCCAGCCTCTTCTCT<br/> CCC GCGTTC CGGGCATTGGGCTCCAAACCTGGGACCAAAGTA<br/> ACTGCCCGGAGCTACTGATCATGGGCTGGTTC CCTGCGCT<br/> GCGGCTGTGCTAGGGAGCCCGAACCCCAAGGGGAAGCCCGCA<br/> CAGCACATCCACCTGCCTCTAGGCGGGAGGACAGCTCCAGGG<br/> AAGGCCCGGTCTGGCAGGCGCTTTCTGGGCACAAACGGAGCA<br/> ACACTCTGGCTGTGGAGCTGCCTCCCCAAGCCAGGGGCACCG<br/> GGACCCTGATTCCCTCCGTGCGGCGCTTAGTCTGGGCGGGGA<br/> AGCACCAGCTTGGGAATGCAGCCTGGGGCGCTTCCCTTCCCT<br/> CAGAAAGAGCTCTCCCCGCGGGAGGCTTTGGCAGTGTGCACA<br/> CCCCAGCCCCCTAAGCCCTCGGCAAGGACGCTGGCTCCTAG<br/> GTCCGAAGGGAAGGCGAGAGCTGAGCTGAGGCACCAGTCAGG<br/> CACCCTCACGGCTCCCACTCCCGCAGCCTGCTCCTTCCC<br/> GGGCGGAACGCTAGAAGCTGGGCAGGCCTTGGGGAGGCTCG<br/> CCCGGCACAGAGCAGCTCTCGGCCGGGCTCTGTGCTATCG<br/> CGCTGGGCGCAGAGCTGGAGCTCCGCCGGTGTGGAAGCTCA<br/> CTCGGCTCTTCCCAGTACAGCCTTGCAAGCACCCGCCGGCAG<br/> CCAGCCTCTTCTCTCCCGGTTCCGGGCATTGGGCTCCAAAC<br/> CTGGGACCAAAG</p>                                                                                                                                                                                                                                                                                                                          |
| MSTRG.90496.2  | 0.02 | 0.13 | 0.01158 | 2.971 | up | <p>GGCGAACCTGCGCGGATCTCCGCGGTCCCCGGCGCCGAGG<br/> CCAGGACGGCCGGCGCTTTGGCCTTGGATGGAATGGGGACT<br/> GGTCTCCGGGCCCTCTACCGTGGATTACTTGGTGCATCTCT<br/> GCCGGGCTTGATGAACCACGACCTCGTCTCCATCCGTGGATT<br/> GGTGCCTGCTACCCAATAGTCGGGTCGTTCCCTGGAGCCTA<br/> AGGATCTCCAGTGATTTCTTTGAGCCTAATGATGGGGAAGCT<br/> GAGAATGGAGCTATTATTTTTAAACACCTTTTGAAATACTAC<br/> TCTTCTGGTTTATGAAGTGAATCAGAGGGCTGTGGCTGAC<br/> CTGAATAGATGCATAGATGCTTTGAACCAAGAAAGCAGGACA<br/> AGTTGAAAGGCGAGCTGCACCCCGAAATCAAGGCCTGGGAGG<br/> CAGGACAGGTGGAGAACTGTTCTCTCGCCACAGTCCCCAC<br/> CAGGAACCTCAGTGTAAACCAGGAAGACCCCAAGGAGCTAAGA<br/> TGGGACCTTCTCTTAAGAGGCAAGTCTCTGGATTGGAATGA<br/> GAAGTCTTATTTTGGAGAATGGACTTCCCTGGTGGCTCAGTT<br/> GGTAAAGAATCTGCCTGCAACATAGGAGACCCAGGTTTCGATC<br/> CCTGGGTGAGGAAGATCCCGTGGAGAAGGAAATGGCTACCCA<br/> CTCCAGAATTCTGTCCCATGGACAGAGGAGCTCGGCAGGTT<br/> ACAGGTCCATGGGGTTGCAAAGAGTTGGACGCAACTGAGTGA<br/> CTAACACACACACGCTTTCTGGAGGCTAAAGGAGCTTCTGGA<br/> TTAAGAAGATGTTTGGAGAGAAAGCAAAGAACCTCGGCCTG<br/> AGGAATCCTGTGTGTGTGACCTGTGTGAACAGGAGGCCACC<br/> TCCAGCTGAAGGGGAAGCCATGACCGTGGACCTTATAACTTC<br/> TTCTGCTGGTGCCTGGTCTTTCAGACCGTCCCCACCAGTCCT<br/> CGGAAACCAGAGGGTTTCTCCTGCATTCTTTCATTCTCGCC<br/> ACCTCCACGTCTGCTGAGCCTTCGGACTCAGCAGTTCTCTT</p> |

|                |      |      |         |       |    |                                                                                                                                                                                                                                                                                                                                                                                                                                                                                                                                                                                                                                                                                                                                                                                                                                                                                                                                                                                                                                                                                                                                                                                                                                              |
|----------------|------|------|---------|-------|----|----------------------------------------------------------------------------------------------------------------------------------------------------------------------------------------------------------------------------------------------------------------------------------------------------------------------------------------------------------------------------------------------------------------------------------------------------------------------------------------------------------------------------------------------------------------------------------------------------------------------------------------------------------------------------------------------------------------------------------------------------------------------------------------------------------------------------------------------------------------------------------------------------------------------------------------------------------------------------------------------------------------------------------------------------------------------------------------------------------------------------------------------------------------------------------------------------------------------------------------------|
| MSTRG.22144.1  | 0.02 | 0.13 | 0.03511 | 2.945 | up | <p>CTTTAGGATGCCCTTGGAAATTAATAAAAAAAAAAAAAAAAAATCAAGAG<br/> GTGACCATGCAGGGGATTGTCTGGCTTTTGGAGGCTCTCAC<br/> CAGTTGGCAATAGTTAGAGAATGACTCAGCTGTCTGGCTCTA<br/> CCTTTCAGACAGATTTAGGTGACCCAGAGACTCATCAACGGC<br/> AGTAAGGCTTATTACACATAGGCATGCCTGGATTAGCCGAG<br/> TCCCATGGGTGCACAGGAAGTTTGTCTTTCTTTCCTACTGCTTC<br/> AGGTACCTTTGATATAGCTCCAGTGTCTGAAATTGAGAACAA<br/> CACAAGCTGCTAATAACAAGGAAGAGGAATGGAAGCTGACTC<br/> GGTTATTATGACAGTACTGTGCTTTGAGCCAATCCTGGGGAC<br/> ACTGACCTCTAGCTTCATGCCCTGCAAGACAGTTACATGTCT<br/> TTATTGTTTATTTAACTCAATAGCTTGGCATTCCCTTATTTG<br/> TAACCCAAAGTTCCTACCTTCTAGATTAATAAATAAAGATG<br/> GCACGATGACAACGAAAGTGAATGGAAGTTTAAAGAAGA<br/> CTTCCAAAAATAAACCCAAGCGGCACATATTCAGTCAGCTA<br/> AGACCCAGGTGTGAGGGAGTTCTGATTTGGATTGATGGAGAA<br/> GGAAATGGCAACTCACTCCAGTGTCTTGCTAGAGAATCCC<br/> AGGGACGGGGAGCCTGGTGGGCTGCCATCTATGGGGTGGCA<br/> CAGAGTGGGACATGACTGAAGTACTTAGCAGCAGCAGCAGC<br/> AGCAGTGTGGTTACTACCAAAAACACCAGAAACTCATTAG<br/> AGGATTGCTCAGTTAGTAACACGATGTCAAGGATAGGCACTT<br/> AAAAACAGTATTGTAGGGCGTCCACAGTAGAGGTCGTACAGAT<br/> CGCAGATTCTGTCTATGAGGATAAATAACTCGGGCTGTGCTC<br/> AGAGGGCATCACATGATGTGGCTGACTGCATCTCAAGTTTC<br/> CCAAGAAGAAAGCAGTGGTGAAGAGCAAATTCATTGCATT<br/> TTCCCTATCAGGAACAGTTTGTAGACATTTGTTTCCAAGGAC</p> |
| MSTRG.110124.7 | 0.02 | 0.19 | 0.03659 | 2.928 | up | <p>AGCAGTTGCGAAGTGAGGTTGGCCTGCGCGGTGGAAGCAAA<br/> CGTGACGTGAGCTTGTGGCCTTTGCTGTAAGTCACTTCAGT<br/> CATGTCCGACTCTGTGTGACCCCATAGACGGCAGCCACCAG<br/> GCTCCCCCGTCCCTGGGATTCTCCAGGCAAGAATACTGGAGT<br/> GGGTTGCCATTTCCCTTCTCCAGCGCATGAAAGTGAAAGTGA<br/> AAGTGAAGTCGCTCAGTCGTGTCCGACCCTTAGCGACCCCAT<br/> GGACTGCAGCCTACCAGGCTCCTCCGTTTCATGGGATTTTCCA<br/> GGCAAGAGTACTGGAGTAGGGTGCCATTGCCTTCTCCTTGTG<br/> GCGTTTGGTAAAGGCCAAACTTTACCAAAAGTTTGTCACTTC<br/> TGTAAGGCAGAGCCACCTGTGTGAGGAGGACATCAGCAAGC<br/> AGAGCTGAGAGTTCAGGAGAGATGGTCCGGCTGACGTCTTA<br/> AAACTCCCAGTGCAGCCCTGGCGGACGCTTGTGGACTTAGG<br/> GACCTGTCCACCTGTGGATGGCTACAGAAAGGAAGAAATTA<br/> CACTTCTTGGTCTGCCAGCTCTCCAAGTAAAGTCATATTCTT<br/> TGCCTCAAGACCTTGCCTTTGATTTATTGGCCTGTGCTGGGG<br/> TAAGCAGAGTGAGCTTGGACTCCATGATAATCCCACATGCCT<br/> TGCAGTCAAAAAACCAAAACATAAACAGAAGCAATATTGTAA<br/> CAAATTCATAAAGACTTTGAAAATGGATCATATCAAAAAGA<br/> TCTGAAACCAAAAAGTAAAAGAACTCGGTGGTCTGCTGAAA<br/> TATTTAGAAAAGAAAATGGTGCCCTCATGCCAGTACCCCT<br/> GAAGTCACACAGGGGACACAACCTAGGGGAGGTCCCTTATCT<br/> CGTCCAGGGGACTGTCATACCAGCCACCATTTCTCCCTGCC<br/> ATGATAAACACACTGTAACGAGGGTCATTGGCACCTGGGCCA<br/> GTAATGCTGTGAACACCTGGATTCTTGTCTTGTGAGATTT<br/> GATGTGAAGATAACACAGAAAGAGAACCAGCAAGAAGGATC</p>          |

|                |      |      |         |       |    |                                                                                                                                                                                                                                                                                                                                                                                                                                                                                                                                                                                                                                                                                                                                                                                                                                                                                                                                                                                                                                                                                                                                                                                |
|----------------|------|------|---------|-------|----|--------------------------------------------------------------------------------------------------------------------------------------------------------------------------------------------------------------------------------------------------------------------------------------------------------------------------------------------------------------------------------------------------------------------------------------------------------------------------------------------------------------------------------------------------------------------------------------------------------------------------------------------------------------------------------------------------------------------------------------------------------------------------------------------------------------------------------------------------------------------------------------------------------------------------------------------------------------------------------------------------------------------------------------------------------------------------------------------------------------------------------------------------------------------------------|
| MSTRG.224419.1 | 0.12 | 0.99 | 0.01518 | 2.903 | up | TTCGCGAAACTTCTTGGGGGTGGCGCCGCCCTCTCCTC<br>TTTTCCCTCCCCTGGGTCCCTTTACACCTCGGTGGCTCCCCG<br>GGCTACTTGCGGGCTCTCCGGGCGAGAACAGGGGTGCCTTGG<br>TGAAGCAGTAATGCGGGGACTTTGGGAGAAAAACGGGGCCAGA<br>ACGTACAGGAAATGCTGTTGAGGCCCGCCAGGGCTCAGCCCG<br>GCCCTGGGAAGTGGGAGTCCTGGAGCCCGGGAAGGGACCCA<br>GAGCCGCCCTGAAAACCACAAGCCCATGATCTGCCCTTCTGC<br>GCCGTGCGAGCCCGCGCAGCCCGCTGTCTGCGCCAGG<br>CTCCAGCAATACTGAACCTTGAATTTCCACATGTTCAAGCTG                                                                                                                                                                                                                                                                                                                                                                                                                                                                                                                                                                                                                                                                                                                                                              |
| MSTRG.221949.7 | 0.04 | 0.3  | 0.00869 | 2.879 | up | CGAACTTGGGAGCAGATCATAGCTGCTAGGTAAGTACGCGT<br>TGTTGGCGGTCTGCGCGCAACCTGAGTGGCGCAGCTGGG<br>TTGGGAATGCGATACGGTAAAAAGAGTTCAGAAGTTGAGGG<br>TTAGAGTGCGGCGTTGAGTATTTACACATGAAAAACGCGCCA<br>CCGGACCGCCACGTGTCCCCTGTGCGGTTGGCGACCGGCTTC<br>GAGTTCAGGCGTCCGTAGGCTGCTGCTGGTCATGGCGCTGCG<br>CGCGCCGTATTGCTAAGCCGGCTGGATAATCCTGAACGGCG<br>CACGGGAAACGACCACATTCCTGAGATTTGGGGCGGGAGTTA<br>CGCTTAACGTTGACTTACAGGCCTTAGATACGTAGTCATATC<br>AACAGTTAATTTAAAAATCGGCAGCTCCTGACTGCGTGAAC<br>TGAGTTGTATTGTGCCAGGTGGCGCTGTGTGCAAAATCGAAT<br>TGTTGGAGGGGAAGGTTTTAGTGCTGAAAACCTTAAGCTATG<br>ACCTTCTATGACAATACTTAATTTTTAAATATATTTATTCTT<br>CCGCAGGTTAAGAAATGATTCTCCCGCAGAAACAATGGATT<br>TCGGTGTAGCGGAACTGTTACGTGGAGATGCTAAGATGCAAA<br>GGTACATTTCAAAACACGCCGACAATATTGGCTGGAAAATG<br>ACTTGTTAAAACCTGATGATCTTACCAGGTATGTGTTGAC<br>TAGTACTTCGAATGTCTATATGTTTAGTCCACGTGTAGATTA<br>AATGAGAAAAATATTTTGTTTTTTAACAGCATTCTGCAGGT<br>TGATGAATACTAATGAAGCTGTGGATGTCACTGAGCAGCTTC<br>ATTTAAAGTAAGTTACCCTGACTTACATCTGCTGCAGTAAT<br>TCTGTCTGGTTTGTGGTAAATGTCCGTGAATGTAGCATAAT<br>GGATTTTGGTCTGATCAATGATGAACCCTATCCCGAAGCTGA<br>TAACCTGAAGAAAAGCATGTACGGATTCCGGCTTCTGAGACAA<br>GACTAATGTTTCAGATATGAGAACAAGTTTTATAACAGATTTT |
| MSTRG.81913.2  | 0.04 | 0.29 | 0.04159 | 2.834 | up | TAACGATGTGACGTCATGAGGCTTTCGGCTGCCTCCACCAA<br>GCGGCTGGCCGCAAGGAGAACGTGACGATTGGCCACGAGAA<br>AGGAAAGCAGGCTTTAGGCTTCAGAGATTGGCTCAAACAAAC<br>TGTCATCATCGTCCACTCTGTGGCTCTCCAGTTTGTAGGG<br>AATCCAAGGGGAATAAAGGAGCTTGTGCCATTTTCTGCG<br>GGAAAACCTGAAGCAGTGAGAGGCTCAAGGAGGGGAGGTCTT<br>GGCCAGGATCCCGAATCAAGTCAGAAATGGGACTCAGGCATC<br>GAGGTATTTAATCTCTAGCCCTCTACTTAATTGTTACAAGTT<br>TTTTAAACCCAGTGACCCCACTCAAGCACTTGGCCTTTGCCG<br>AGTCCTACCACGCTGGGAACACCCACCCGCTTCGTCTGGCCG<br>TCATGAGTCAGTCCCGACAACTCAGTCGCCACATCCTCCA<br>GATGGCAGCCACATGGGACAACCTGAGTAATGGCCATGACTA<br>GTCTTAGCTGAGATAAGCTATGGCTGTAAAAACACCAGATTCT<br>GAAGACTTCAGTGCTGCATTAGGTATAGACCACGAAATGGA<br>CAAGATCACTGGAGAGTTTCGTGTGATTAGAAAAGGTGGTCAGA<br>AGACCTGAGTCAAATGAAGAGTTGGGTGTCTCTAATGAGGC<br>CGCAATGATTCTGCTAAAACAGCACTGGCAAGAGGCCCCCA<br>GTCTCAGGTGAGACTGAAGCTGAGACCTTGATAGCAGCATAG<br>TCATACCCTGAGCCAAGCACCTGCTAAGCTGCACCCGTGCC<br>CCTGACACACAGAGACTGAGATTAATAAATGCATTGTTGTAA                                                                                                                                                                                                                                     |



|                |      |      |         |       |    |                                                                                                                                                                                                                                                                                                                                                                                                                                                                                                                                                                                                                                                                                                                                                                                                                                                                                                                                                                                                                                                                                                                                                                                                                                     |
|----------------|------|------|---------|-------|----|-------------------------------------------------------------------------------------------------------------------------------------------------------------------------------------------------------------------------------------------------------------------------------------------------------------------------------------------------------------------------------------------------------------------------------------------------------------------------------------------------------------------------------------------------------------------------------------------------------------------------------------------------------------------------------------------------------------------------------------------------------------------------------------------------------------------------------------------------------------------------------------------------------------------------------------------------------------------------------------------------------------------------------------------------------------------------------------------------------------------------------------------------------------------------------------------------------------------------------------|
| MSTRG.215663.1 | 0.03 | 0.21 | 0.00597 | 2.821 | up | <p>ACTTCCAGAACACAAGAAGTTTACACTGAATGGCAATTTTTA<br/> GATCTTGGCATAAAGTTGTACTGATTTCAACACAGTGGCTTT<br/> TTGCAGTCACAAATACAGAGGATGACATGAGAATTTAACACG<br/> TGAAGTTCGAGTCGTCCAAGAGTTTACAGAAGAGATTCAGAG<br/> TTTTTATTTTATTTCTCCTCTGAAAGGCTGTTATTTGGAGGT<br/> TGGGTGCAGACTCCGATCCTACAAGTTCAAGGCTTCTAAAA<br/> CAGGGAACCTGCTAATCTGGAGTTAAGTTTGCCTGGATTT<br/> ATTGGAAGGGCTCTAATGCAACAACCTCACCACAAAAAGG<br/> CCTCGAAGTGCAATCTACGTATGGGTGTGGGCTGGGTGGCGG<br/> GAGAAGTGCAGAGAAACGATTCAACATTTATGCAATAAAAAG<br/> GGTCACCAATTCTGCGGCGAAGAGGGCAAAAAATGCATTTTC<br/> ACCACCCCTCACACTACTCTGCGGCTGACGGAACCTGATAC<br/> CATTTTATTTAAGGCTCATTATCTCCAGTTACCACCTCCAAG<br/> ACCTCAGCGCCTAACAGGTCCACGCAGGATCTTGAACGGTA<br/> CGCTAGCCATTCCCTCGAGAGAAACCAAGGCGGACACTCACA<br/> AGACGGCCACAGTTTTCCTACTGCCTGTGCAAGTGTCCCTG<br/> AGGGCCAGCTATTGGGATAAGATGTTGCAGAATTTTGATGT<br/> ATTTATTTATTATTATTATTTAAAAATTTATATATAATATACA<br/> GCTCATACATATTGTATATAAATTCTAAAAATATATGTATGT<br/> ATAAAAACTCTGAGATTTAGATTTTCTGTAGTGTCCGAGG<br/> GCTAGAAAATGTGGCAGTGGGGAAAGGTAGTGGTGAAGGAT<br/> GGGTGAGAGAGAGAGAGAGAGAGAAAGGAGTGGAGAGAAG<br/> CCCAGAGGGCTGGGGGTGGGAGGAAAGAGAAAGGAAAGGGCA<br/> ATGAGGGAAAAGGTGCTGGAAGAGCACAGGCTTTACAATCA<br/> GACAACTAGCTTGTACTCTGTGACCTTGGGAAAAGTTACGTA</p> |
| MSTRG.8488.1   | 0.04 | 0.29 | 0.00911 | 2.812 | up | <p>ACTTCCAGAACACAAGAAGTTTACACTGAATGGCAATTTTTA<br/> GATCTTGGCATAAAGTTGTACTGATTTCAACACAGTGGCTTT<br/> TTGCAGTCACAAATACAGAGGATGACATGAGAATTTAACACG<br/> TGAAGTTCGAGTCGTCCAAGAGTTTACAGAAGAGATTCAGAG<br/> TTTTTATTTTATTTCTCCTCTGAAAGGCTGTTATTTGGAGGT<br/> TGGGTGCAGACTCCGATCCTACAAGTTCAAGGCTTCTAAAA<br/> CAGGGAACCTGCTAATCTGGAGTTAAGTTTGCCTGGATTT<br/> ATTGGAAGGGCTCTAATGCAACAACCTCACCACAAAAAGG<br/> CCTCGAAGTGCAATCTACGTATGGGTGTGGGCTGGGTGGCGG<br/> GAGAAGTGCAGAGAAACGATTCAACATTTATGCAATAAAAAG<br/> GGTCACCAATTCTGCGGCGAAGAGGGCAAAAAATGCATTTTC<br/> ACCACCCCTCACACTACTCTGCGGCTGACGGAACCTGATAC<br/> CATTTTATTTAAGGCTCATTATCTCCAGTTACCACCTCCAAG<br/> ACCTCAGCGCCTAACAGGTCCACGCAGGATCTTGAACGGTA<br/> CGCTAGCCATTCCCTCGAGAGAAACCAAGGCGGACACTCACA<br/> AGACGGCCACAGTTTTCCTACTGCCTGTGCAAGTGTCCCTG<br/> AGGGCCAGCTATTGGGATAAGATGTTGCAGAATTTTGATGT<br/> ATTTATTTATTATTATTATTTAAAAATTTATATATAATATACA<br/> GCTCATACATATTGTATATAAATTCTAAAAATATATGTATGT<br/> ATAAAAACTCTGAGATTTAGATTTTCTGTAGTGTCCGAGG<br/> GCTAGAAAATGTGGCAGTGGGGAAAGGTAGTGGTGAAGGAT<br/> GGGTGAGAGAGAGAGAGAGAGAGAAAGGAGTGGAGAGAAG<br/> CCCAGAGGGCTGGGGGTGGGAGGAAAGAGAAAGGAAAGGGCA<br/> ATGAGGGAAAAGGTGCTGGAAGAGCACAGGCTTTACAATCA<br/> GACAACTAGCTTGTACTCTGTGACCTTGGGAAAAGTTACGTA</p> |

|                |      |      |         |       |    |                                                                                                                                                                                                                                                                                                                                                                                                                                                                                                                                                                                                                                                                                                                                                                                                                                                                                                                                                                                                                                                                                                                                                                                   |
|----------------|------|------|---------|-------|----|-----------------------------------------------------------------------------------------------------------------------------------------------------------------------------------------------------------------------------------------------------------------------------------------------------------------------------------------------------------------------------------------------------------------------------------------------------------------------------------------------------------------------------------------------------------------------------------------------------------------------------------------------------------------------------------------------------------------------------------------------------------------------------------------------------------------------------------------------------------------------------------------------------------------------------------------------------------------------------------------------------------------------------------------------------------------------------------------------------------------------------------------------------------------------------------|
| MSTRG.198921.1 | 0.02 | 0.16 | 0.03246 | 2.812 | up | CCATCCCTTCATTCTTTCTGGAGTTATTTCTCCACTGATCTC<br>CAGTAGCATATTGGGCACCTACTGACCTGGGGGCATCAGAGG<br>GCAGACACACTGAAACCATAATCGCGGAAAACCTAGTCAATCT<br>GATCACACTAGGACCACAGCCTTGTCTAACTCAATGAAACTA<br>AGCCATGCCCATGGGGCAACCCAAAATGGGCGGGTCATGGTG<br>GAGAGATCTGACAGAATGTGGTCCACTGGAGAAGGGAATGGC<br>AAACCACTTCAGTATTCTTGCCTTGAGAACCCATGAACAGTA<br>TGAATAGTGACTTTAGAGCCTGGTTATTCAGGTAGCAAAGGG<br>GCAAGCAACCTTAAAAGGCCAGGGAACGTGGGTATATGGTTA<br>AATATGCTTCAATATAGCATCAGCAAGGGCTTCTGGATAGC<br>TTAGCTGGTAAAGAATCTGCCTGCAATGCAGGAGAAAATGAA<br>AAAGACTGAGTGACTAAGCACAGCGCATAGCATCAGCAAACA<br>ACGTGAAAGACTGCATGGTACGGTGACGGGAGGTACACAGGC<br>TCTGACCCCTGCAGCCAAAGCAGATGGGAGGACAGGCATCAT<br>TATGAAGACCTCACAGCAGAGAGAATTCAGAGCTGGAAGGAT<br>GAACAAGTGGAGGCAGCTGGGGGCACTAAAAGACGCCCCAGG<br>GAAGAAGCTCACAACTGTGGTCTACTCCGGGAATGGTAGAG<br>TTGGATATGTTTGTGTTTCTACCCTAATTAGTTTTCTTT<br>GTCCTGCCTGCGGTGTGTCCACAGGATTTTCTGATAACTT<br>CATAAGGCATGTTACTTTGCCTTAATCTGTTGATTTCCCAG<br>ACACTGGTATGCCCTCTGTTGATTCTGTGGGTGAGGAGTCT<br>GGCAGGCTTTAATCCATGCGGTACAAAAGAGCTGGACACAAC<br>TGAGTAACTAAGCACAGCACAGACGCGCTAACGATTGCGTCC<br>CGTTGGCTGTAGCCCTTTGGCTGTGGCCTGGGCCTGTGGTG<br>GTCACCTCCAGGTGTGAGTGGCCTCAGTGATACACACTCTGT |
| MSTRG.42208.1  | 0.02 | 0.18 | 0.02006 | 2.773 | up | ATCTAGTCTTCTCTTGCTGCTGCTAAGTCACAGAGTCAGACA<br>CGACTGAAGCAACTTAGCAGCAGCAGCAGCTGGGTTAACGGC<br>TTCTGCCAGCAGCCAATTCTTACATCACCCATCGTCACTTC<br>ATTGTTTCTTCTACTTCTGCCCTCAAAAATGTTGGGACACTC<br>AATTAATCTTCAGTCTTGAAACTGATTTATAACTATGTAT<br>GTGCACAAATAGGATTTGCAGAACTGAAATAAGGTACAGGAA<br>GTGAAATTGGCTTGTTACTCTGATTGTTTTTGCCAGTTTCC<br>TATGGTGGAGGCTGGAGAACACATTGGACCACAGTATAGAAA<br>AGAAAAATATGGTGAATATTGGACATTACTATGTCTTATAA<br>CTAAGTTTTAAAAGTAGGTATTAACCATTTCAGACAATGCATG<br>AATAATAATTAACATTA AAAAGTTTAGCATGTGGAATTGAT<br>GCTTTGTGTAATAATACTAAAAACATTTGGTAATCTTTTTTA                                                                                                                                                                                                                                                                                                                                                                                                                                                                                                                                                                                                                  |

|                |      |      |         |       |    |                                                                                                                                                                                                                                                                                                                                                                                                                                                                                                                                                                                                                                                                                                                                                                                                                                                                                                                                                                                                                                                                                                                                                                            |
|----------------|------|------|---------|-------|----|----------------------------------------------------------------------------------------------------------------------------------------------------------------------------------------------------------------------------------------------------------------------------------------------------------------------------------------------------------------------------------------------------------------------------------------------------------------------------------------------------------------------------------------------------------------------------------------------------------------------------------------------------------------------------------------------------------------------------------------------------------------------------------------------------------------------------------------------------------------------------------------------------------------------------------------------------------------------------------------------------------------------------------------------------------------------------------------------------------------------------------------------------------------------------|
| MSTRG.108770.3 | 0.03 | 0.23 | 0.02723 | 2.772 | up | GTTACTTCAGTCCTGTCCAACCTCTGTGCAACTGTATGGATTT<br>CAGCCTGGTGGGCTGCCGTCTATGGTGTGCGACAGAGTCGGA<br>CACGACTGAAATCACTTAGCAGCAGCAGCATAACCATGTGAAT<br>TATGTCTCAATAAAAAAAAAAATCAAAAAGAGAAAAATAGAAG<br>GAGAAGTTGTTGACACTCTGCTCCAGACCCCTCCACATCTCC<br>CTGCCATCCTCACCGGCCCTCCACGGGCCCTTGGCACTAC<br>CCTTGCCCCACAGCTGGTTGGTAGGTAGCAAGACAGCACACA<br>CACAGCCGTTGCTATGGTGACATGTGACCGGTCCAAGCCTTG<br>TTTCTGCTCCTCATCTCCAAAGCAGGTGGGCGAGCTGTGCCCA<br>GGACAAGCACAGATGCATTGATACCACATGGTAACATTGATC<br>TTCATTTCTGCAGGGCATTCCAGGGCACGGGGTTTCCAAT<br>TGAACCATGGAGCTTCTGGAAACAGTAGCCTAAAAGGTTTCT<br>CTGCCATCTGGTCTTTAATGACCCTTCAGCTCAAACTCCA<br>AGGCTTCCAGAGAAGCAGTCTGGATTAATAATGCTACTTTTTT<br>TTGCTGGAGCAGCTGCAGAAAGTTCTGAAGACACAGGCAATC<br>TTAGATTACTTCATTTAGGAATAAGAATCTTTGCCCTG<br>AGTAAGAACAACCTTTATTTTTGTATCTGTGGTTTGCAGCT<br>TGTTAATTCTTTTTTAGTTTTTAAGGGAATTCATATTG<br>TTCTGGGGCTTCCAGGTGGCACAGCGTAAAGAATCTGCCT<br>GCCAATGCAGGAGACACAGGAGATGCGAGTTCAATTCTGGG<br>TTGAGAAGATCCCCTGGAGGAGGAAATGGCAACCCACACCAG<br>TATTCTTGCTGGGAAATCCACAGACAGAGGAGCCTGGGGA<br>GCTACAGTCCATGAGGTCACAGAATCCAAAATGACCGAGCAC<br>ACACACACACACACACACACACACACACACACACACACCCCA<br>CTACTCTCCCTAACACACCTGCTTTTCAATTCACTACATGG |
| MSTRG.17023.4  | 0.02 | 0.16 | 0.03395 | 2.703 | up | CTTCCTTTATGCTTCACAACAACATATGAATCTCTTGCACAT<br>ATAATCCCATCTTGGTATCTGCTTCTTGGAGGACCGTGGTCT<br>AACATCTCATCTGATGAAGGAAGGAAAGAAGGTTGATCA<br>CATTGAATGATTTGTATATATTGAAGAATCTTTCATCCCTG<br>GAGTAAACCCAACTTGATCATGGTATGTGAACTTTTTGATGT<br>GTTGCTGAATTCTGTTTGTAAAATTTTTGTTGAGGATTTT<br>TGCATCTATGTTTCATCAGTGATATTGGCCTGTAGTTTTCTTT<br>TTTTGTGTTGCTTTGTCTGGTTTTGGTATCAGGGTGATGGT<br>GGCCTTGTAGAATGAGTTTGAAGTGTTCCTTCTCTACAGT<br>TTTTGTAGGAGTTTGAAGGACAGGCATGAGCTCTTCTCT<br>AAAAGTTTGATAGAATTCTCCTGTGAAGCCATGTTGTCTGG<br>GCTTTTGTTTTTGGGAGATTTTTGATCACAGCTTCAATTT<br>AGTGCTTATAATTGGCTTGTTCATGATTTCTGTTTCTTCC                                                                                                                                                                                                                                                                                                                                                                                                                                                                                                                                                                         |
| MSTRG.83189.1  | 0.02 | 0.17 | 0.04115 | 2.685 | up | GCACCCGGGGAGACAGGCATTCATCTCGAGTGAAGCAAAGA<br>ACCCGCTCTGCTCTCGAGTCGCGACGGGTATCTCTTGGAGC<br>TCACTGGGTGGACTAAAGGGAGTCAAGCCTCCTGAGGCGTTT<br>GGAGAGAGGTCGCGAGATTGGCCTCTAGGCCATGAAGGAGAC<br>GAAGTCTCATCTCCGATGACGGGGAGTCTCGTGGTGG<br>TTCTCGAGCGGTGGCCCCAGGGTGGTTTTCTCACGAGGTAC<br>GACGGCAGGTCAGTGAGCCTCTCGTGGGGCGCCAGGGAAGT<br>CGGGTCTCCATGCGAGTGCGAGGGGGAGCACGTCATTGCTC<br>TCGAGTCATGGTAGGGGAATCTGGCCTCGAGACGTGTTGAAG<br>AAGGCTCTCGAGGCCTTTCTCGGTTGAGGCAGGAAACCCCT<br>GGCTTCCCTCGACTTGTGCAGGTGACCTCAGGGGACTTCTCA<br>TGGTGGCTCTGAGAAGTCAGGGAAACTGGAGGTGGGAGGGGC<br>CTCTCGGGACTCCACGGGGTTTGGTGCATTGGAAGAGGGCCT<br>CATCTCCAGTTGAGGCAGGAACCGCAGGGTACCTCTGATTT<br>AGACTCCGATCGCAGGGTCCCTGCAGACTGGGGACAGGAGAG<br>TCAGGCCTCGTCTTGGGTCGAGGCATGGAACCTCCGC                                                                                                                                                                                                                                                                                                                                                                                                                                |

|                |      |      |         |       |    |                                                                                                                                                                                                                                                                                                                                                                                                                                                                                                                                                                                                                                                                                                                                                                                                                                                                                                                                                                                                                                                                                  |
|----------------|------|------|---------|-------|----|----------------------------------------------------------------------------------------------------------------------------------------------------------------------------------------------------------------------------------------------------------------------------------------------------------------------------------------------------------------------------------------------------------------------------------------------------------------------------------------------------------------------------------------------------------------------------------------------------------------------------------------------------------------------------------------------------------------------------------------------------------------------------------------------------------------------------------------------------------------------------------------------------------------------------------------------------------------------------------------------------------------------------------------------------------------------------------|
| MSTRG.227580.1 | 0.03 | 0.21 | 0.03223 | 2.657 | up | TGTATATTATATTCTGGGAAGTAGAATCAAAGTCAGGAATTA<br>TCAGTTACATAGTCTGAATACAAATGTTAAAGTCTGAATTGA<br>TAGGAAGACTGTCCTCTTGACCAGAAAAGCAGTCTCCTTAA<br>GAGAGAGATGGAGTGATAGCTACTTCCCCATTTTCTAACT<br>GTATCTTGACTTTTCTTGTGATTGAAGACCCCGAAGTGCAAG<br>CCTGAGTCTCATCTTGTGGCTTATCAGCATCATGGGCTGCAC<br>CTGTAGCTCCATTCGTATCCTTCCCTTGCTGTGGACTGTTTAC<br>TGCAAGGTGCTGGCTACTGCTCTCTCATTGAAATACGAA<br>AAACACCTAATGATGGTCTTTGCACAGTAGAGCTTGAAGTAT<br>AGTCTAAAGGAAATAGATGTAAAGTGTGTTTTCGTCTCTCT<br>GTGTGAGAGGAGAAAAATGCTTTTGTGTAATCAATTATAC<br>TTTCTCTGAAGTTTTCAGGTAATATTTTCAGTAGGTAGGTCTT<br>CTTCTGGAGAAATACTGGAAAGGCTCCAAGGAAATCAATCT<br>CAGTTCTCGCTTTGGTGTGGAGATCCTCTGTGGGGAGGTCC                                                                                                                                                                                                                                                                                                                                                                                                                          |
| MSTRG.8306.3   | 0.46 | 3.05 | 0.02466 | 2.635 | up | TCTGATGCCAAGAAGCCAAGAGAAGAGAGGATTTCAAGGAGG<br>ATAAAGTAATTGGTGGTGTCAAGTGGTACCAAGAGGTCATCA<br>GGAGGACTGGTTCATGGCCAGAGGTTGGGGACCCCTGCAC<br>TTGAATTGACCCAAGTTCCTGCTTCTCCATCATCATAGTGCC<br>ACTTTCTGCTCTGAACTACCTTCCCTTTTGGTAACATGAAG<br>AAGGGATCCCAGAGAAGGAGATCAGGAGATGGAGAACCATTG<br>GTGGATTTTGTGAGTGATAAGATGTGGTCGTTTGAAGAAA<br>CATTACTCTTGAACTCTGAAGGTGGATCAGATCAGGACTTG<br>TCTAATTGAAATGCATCTTCTCTGTACACCCACTTCCCT<br>GAAGAGTTCCTTCATGTTGTCTGAGGCATTGAGTGAGTAAAA<br>AAATCTGCATATCTCTGAGTTAGAATTATTCAGCTTAACTTT<br>AGATCCTATAGTCCCTTGTTTCCCTCATAATAGGATAAAGAA<br>AAAGACAGAGGAGTCTGCTTTTTCAGTGCCTTACATCACCCA<br>GACAGTTGGCAGCCAGGAGTCAGGCAGCTGCCACACTCTTCA<br>CGTATCTATTTAAAGTTCAAAGAGACACTGGATAACAATAAC<br>AAAGAGGTAAGAGTGGCCCTGACCAGCCACCCAACAACAGG<br>AAGAATGGCTGAAAAAGAGGCTACATTATCTCGCTATGTGGT<br>CCCTATTCTTCTTAATTGGCTGGATTGTGGGATGCATCGT<br>AATGGTTTATGTTGCTTCTCTTAGAAAAGGCCAGAAGACTTC<br>AGACTGACATCATTTAGAAGAATTAAGAAAAGCATGAAATGA<br>CAGATTATTAATGTTTCTCATGTAATGACTGCAATGGTTG<br>ACATCAGTTTATAAACTGCATTTGTAAACTGTTGCTTTGAA<br>CCTAAGAATCTCATCAGAAACATATTTTAAAAATTCTGGGTAC |
| MSTRG.140824.1 | 0.06 | 0.42 | 0.03619 | 2.615 | up | TGGGAATCTCATTTCCAAATATGAAAACAGAAGAACAGCACC<br>ATTCTGAGGAGGTCCTTGCCAAAGAAAAAAAAAATCCAGGA<br>AAAGTTGTGAAAATGTCAATAATCCTAATAGGGAATAAACG<br>CAGCTTCAGCCGATTCAGTGCAGCTGTCAGGACATCGTGA<br>GTGTTGACGCTGAAAGTGTGACTGAAGCCGTTCTACAAA<br>CAAGGCTGTACGTTTCTCGCTGGCAATGAAATGGTGAACGA<br>GTTCAAGGACAAGGAGCCGAGCCAAGAAAAGAGTCTCCAAAG<br>AAGGCTTCCCAGGTGGCTGGGTGATAAAGAATCTGCTTAACA<br>ATTCAGGAGCCACAGGAGATACAGCTTCCCTCCAAAAGTATC<br>TTCAAGACAGCTCTGTTGTATAGAATGAAGTCACCGCAGGT<br>ATGGCAATGTTTTTCAAACACATGGAGGATAACTAAAAACA<br>GCAGGTATGCCAATCCTAATCTCCCCAATCATTGGTCTCTCC<br>TTCTCCACGCCTCCCATGTATGTGTTCTCTACTCTGCTTCTC<br>TATGCCTGCCCTGAAAATGGGTTTATCTGTACCATTTTTCTA<br>AACTCCACATATACTGGTAAATATACTCTATTTGTTTTTCTC<br>TTTCTGACTTAACTCTGAGTGACAAGACTCTAAGACCATCCA<br>CATAGTTAGTGGGAAGCTGCTGTACAGCACAGGAAGTTCAGC                                                                                                                                                                                                                                                                                 |

|                |      |      |         |       |    |                                                                                                                                                                                                                                                                                                                                                                                                                                                                                                                                                                                                                                                                                                                                                                                                                                                                                                                                                                                                                                                                                                                                                                          |
|----------------|------|------|---------|-------|----|--------------------------------------------------------------------------------------------------------------------------------------------------------------------------------------------------------------------------------------------------------------------------------------------------------------------------------------------------------------------------------------------------------------------------------------------------------------------------------------------------------------------------------------------------------------------------------------------------------------------------------------------------------------------------------------------------------------------------------------------------------------------------------------------------------------------------------------------------------------------------------------------------------------------------------------------------------------------------------------------------------------------------------------------------------------------------------------------------------------------------------------------------------------------------|
| MSTRG.43630.19 | 0.04 | 0.23 | 0.01453 | 2.564 | up | GGGAATCAGGGTCCCGGTGCCCTGGCTTGGGGAGGCAGCTC<br>CACAGCCAGAGTGTGCTCCGTTTGTGCCAGAAAGCGCCTG<br>CCAGACCGGGCTTCCCTGGAGCTGTCTCCCGCCTAGAGGC<br>AGGTGGATGTGCTGTGCGGGCTTCCCTGGGCGTTTGGGCTC<br>CCTAGCACAGCCGAGCGCAGGGGAACCAGCCATGATCAGT<br>GAGCTCCGGGCAGTACTTTGGTCCCAGGTTTGGAGCCCAAT<br>GCCCCGAACGCGGGAGAGAAGAGGCTGGCTGCCGGCGGGTGC<br>TTGCAAGCCTGTACTGGAAGGACCGAGTGAGCTTCCACACC<br>GGCGGAGCTCCAGCTCTGCGCCAGGCGGATAGCACAGAGC<br>CCCGGCCGAGAGGCTGCTCTGTGCTGGGCGAGCCTCCCCAAG<br>CCCTGCCAGCTTCTAGCGTTCGCGCCAGGAAGGAGCAGGC<br>TGCGGGAGTGTGGGAGCCGTGAGTGGTGCCTGACTGCTGCCT<br>CAGCTCAGCTCTCGCCTTCCCTTCGGACCTAGGAGCCAGGCG<br>TCCTTGAGAGGGCTTAGGGGCTGGGGGTGTGCACACTGCCA<br>AAGCCTCCCGCGGGAGAGCTCTTCCGAGGAAAGGAAGCG<br>CCCAGGCTGCATTCCCAAGCTGGTGTCCCCGCCAGACT<br>AAGCGCCGCACGGAGGAATCAGGGTCCCGGTGCCCTGGCT<br>TGGGGAGGCAGCTCCACAGCCAGAGTGTGCTCCGTTTGTGC<br>CCAGAAAGCGCTGCCAGACCGGGCCTTCCCTGGAGCTGTCC<br>TCCCGCCTAGAGGCAGGTGGATGTGCTGTGCGGGCTTCCCT<br>GGGCGTTTGGGCTCCCTAGCACAGCCGAGCGCAGGGAAACC<br>AGCCCATGATCAGTGAGCTCCGGGCAGTACTTTGGTCCCAG<br>GTTTGGAGCCCAATGCCCGAACGCGGGAGAAAAGAGGCTGG<br>CTGCCGGCGGGTGTGCAAGCCTGTACTGGGAAGGACCGAG<br>TGAGTTCCACACCGCGGAGCTCCAGCTCTGCGCCAGGCGC                 |
| MSTRG.122434.4 | 0.03 | 0.19 | 0.02685 | 2.56  | up | ATTTTGAAGGACACAGTCTGCCACAGCCAGCTCCCAAAG<br>GATACATTTAGAAAAGAAAGAAATCGATTATGAAAGTAAGGA<br>ATGGAGTGCAAAAACATTGAAATGATATGTTGTTGTCATAAG<br>TAAACTTTACTAAAGATGTCGGAGCAGATACAGCTGAGTGA<br>TGGATCATGGTGACCCCTTAAGAATGAACAAAGGAATGTTAT<br>CTTCTGAGGAATTATGTGGGCTGGTGTCAAAGAAGAGCAAC<br>TGATGTTTATGTCTGAAGAGGTATTTCTGTCATTGGGAATC<br>TGATTAATGCAAAATGTAGATGCATGATGATAGGAGAGGGG<br>AGGGAAGAGACTAAAGAACAGAGAAAATTTTATGTTAAAGT<br>TTTTCTTGTCTTGCCTGAAAATGTGAATTATTGCCTCATGTA<br>TATACATACAAACACCGTTTTTTCACATTTCCGTGAGTTCAGG<br>ACTGCCGAATAAACCCAGTAAATAACCTCTAATTACTTCTT<br>AGCCGAATCTCCGTTCCCTAAAATCTGAAGTCCGCAAATTA<br>TAACTAAACTAAAATACCTTAGATGCCTACCACAAGATACAA<br>GATCTGTTGTTTTGGATATTTCAAATGAAGTCTTACAAGT<br>TACCTAAAGCATATATGAACTGTGCACCAGAGAAATCAACTT<br>TTTTATTCTTTCTTCCCTTCTGTTAGTCACTCATTCTGTT<br>TAACAAACATTTGTTTGCTAAGCACTTTCTATTTTGAATAA<br>TACCTTTACGTAAAATCAACATCCAGTTTCAAGAATCAAAGC<br>AGTTAATGGATAGAATCAATATTTAAAAGAGACAATTACAAC<br>TGGGTGCTGTGACAAGGATCATGGAGGAGCAGGAGAGGAAGG<br>GGTGTGGGAGGGGTCAGTGGGAGGGCACCAATACAGTCT<br>GGGAATTGGGTACGGCTGAGAGTGAAGAAGGCTGAGCGCCAA<br>AGAATTGATGCTTTTGAAGTGTGGTGTGGAGAAGACTCTTG<br>AGAGTCCCTTGGACTGCAAGGAGATCCAACAAGTCCATTCTG |

|                |      |      |         |       |    |                                                                                                                                                                                                                                                                                                                                                                                                                                                                                                                                                                                                                                                                                                                                                                                                                                                                                                                                                                                                                                                                                                                                                                                                                                         |
|----------------|------|------|---------|-------|----|-----------------------------------------------------------------------------------------------------------------------------------------------------------------------------------------------------------------------------------------------------------------------------------------------------------------------------------------------------------------------------------------------------------------------------------------------------------------------------------------------------------------------------------------------------------------------------------------------------------------------------------------------------------------------------------------------------------------------------------------------------------------------------------------------------------------------------------------------------------------------------------------------------------------------------------------------------------------------------------------------------------------------------------------------------------------------------------------------------------------------------------------------------------------------------------------------------------------------------------------|
| MSTRG.5694.1   | 0.02 | 0.14 | 0.03815 | 2.551 | up | <p>ATCATTGTGTCAGTCATTTGACAGATAAAATTA AAAAGATTGCA<br/> CCTTTGTACAGTTTGGAGTGAAAAAATGTGATCTGGCTGC<br/> TGATGACTACAGAGACATAACTCTGGTTGTAAGCAATTAGGC<br/> TGTTGGCTCGAGCAAAGTGATGGCTAGCTAGA ACTTTCTTAA<br/> TGGGTCAGTAGGGATAGGCAGCATTTCATCTCCATTTATCATA<br/> ATGAAAACCAGGCAGAAGTTAAGCATGCGTGAACAGTTAGAA<br/> CAACAACTTTGTTTTTATAACCATCGAGTTCATTAAGGGCCA<br/> CTCAGTCTGTGCCAGCACTATTTCCCGTGAAGCTATAGCTC<br/> ATTGTTTTATTATAATGTGTTCTTGTAATAATAGTCAACCA<br/> CTTTTGTACTGGACCTAAGGTGAGGTAGGGGTGCATCTTCCA<br/> CATTTTTCAAGAATTCACAAGAGGAATTGATTATACACTTG<br/> ATAAATGATCATTTTTATTATTTAATTTTATCAGTAGTAT<br/> TGAAATTGTGTTGCAAACATAACAATAGTATAACAAGGTAA<br/> ATTCTTATTAACAATCTCACAACAAAAATGGTGCTCACATTA<br/> TATGGGAGTCACAAAGGAGGTACAGTCTGAGCTCACAAAG<br/> AGAAATATTAGATTTTTATTTATTTATTTATTTTCAAATC<br/> AGACATGAGTAAGATTCTTTACATGGCAGTAATGACTACTAC<br/> AATAGACATGTGACATTGGCAAACTGGAGTTGAACATGAGT<br/> GACAGCCACCTTCCAAAGACATTTTCAAAGAGGATTAAGCT<br/> GTGTCTCCAAAACAGTAGCAGGAAGCAAATGTCAGAGAGGT<br/> CTTGGCCCAA ACTTACTTTTCGGTAACCATTAGTCATTCTCT<br/> GACACCTCAAGGGAGACTTCTGGACAATACCACAGAGGTTGA<br/> GACGCTTTCTCAGTAGTGCAGTCTTACCCTGTCTAATGTTT<br/> GAAACAAAAATAACAGTGGCATAACCAGTAAACCACACATCA<br/> ATTTTCATCTGATACGTGGTAAGTAGGGCTTGTCACATTGCA</p> |
| MSTRG.20952.14 | 0.13 | 0.73 | 0.02468 | 2.55  | up | <p>GTTGGTTCAAGGCCTGTACTGATAGGAAAAGGAAAGCGCTG<br/> CCTGTTGCTGAATTCAGGACGATCAGTCTCTCCTAACGATCT<br/> AGGTTTTTTAAGCTATATTTTAGCCGAAAGTTTTCTTAAAGA<br/> AAAAAAAACAAAAACAGTAGGTTAGGGTGGGGCATTAGGGA<br/> GACTAAAGGGGAAGAGAGGTGATACTTGAGCTTCAGTTAAAA<br/> TCTTAAAGTAACCAGAAGGGAGGAAAGGCTGGTAACTTTTTA<br/> TTTTAGGAGAATGTCTTTGAAAACATTTCTGCCAAGTTTGTG<br/> GTTCTTCATGAAGCTGTAGTAAGGGCGCTGGATTAGAAAATC<br/> TGGGCGTATGACTACACCAAGTGTTAAAGGCCCTTCCTTCTT<br/> CCATGATTATAGTAGCAGTTTATTGTCCTGTGATAGCTGCTG<br/> TTTTCATTGTTCTGAAGATGGTCAACTATCGACTCCACAGAG<br/> CCCTGGATGCTGGAGAGATTGTAGATAGGAACGCAAATGAGT<br/> TCACAGATCAGCGATCCAAA ACTGAGCAAGGCAACTGTTCAA<br/> CACGGAGAAAAGATAGCAATGGCCCGAG</p>                                                                                                                                                                                                                                                                                                                                                                                                                                                                                                                                                      |

|               |      |      |         |       |    |                                                                                                                                                                                                                                                                                                                                                                                                                                                                                                                                                                                                                                                                                                                                                                                                                                                                                                                                                                                                                                                                                                                                                                                          |
|---------------|------|------|---------|-------|----|------------------------------------------------------------------------------------------------------------------------------------------------------------------------------------------------------------------------------------------------------------------------------------------------------------------------------------------------------------------------------------------------------------------------------------------------------------------------------------------------------------------------------------------------------------------------------------------------------------------------------------------------------------------------------------------------------------------------------------------------------------------------------------------------------------------------------------------------------------------------------------------------------------------------------------------------------------------------------------------------------------------------------------------------------------------------------------------------------------------------------------------------------------------------------------------|
| MSTRG.87428.3 | 0.03 | 0.19 | 0.01164 | 2.534 | up | AGGCTTTATAGGAGAGGACAGGGTCCCTGATCTCCTAGAGCT<br>GGTGGAACCTGATGAAGCTGGAATGTGTGGGGGGCTGTGCTG<br>TCAGAGAGAATCACAGGAGACTTCTGGGGAAGTGAAATACTG<br>AGCTCAGCTGAAGGCTGAGCTAGTGGGAAATGATGAGGTAGT<br>GGGAGGGTAGATGGGAGCATTCCAGGCACAGGGAACAGCGAG<br>GCGAAGCCCTGCAGCAAGAGGGAACGTAGGTCCAAGGATGTG<br>CAGGAAGGCCTGTGTAGCTGGGACACAGAGGGCAAGGGGTGT<br>TTGCAGCCAGCAAAGTTGGAGGGCAGTCAGGGGCTTGAAGC<br>TCAGCACTGGGGTGGCAGTGAGATGATGGCACCTTTGGACGG<br>AGGTGGGCTAGTCAGAAAAGGAGGAATAAGTTTGTGTAGGTG<br>GGGCCAAGTTTGGGGCAGGGTGCCTCTGAGGAACCCGAAGTA<br>AAGCTGGGCTGGAGATTTGGGGCTCAGTGCTCAGAGGTGGTG<br>AAGAAAGTGAGTACAGAGGGAACAGAGGCCCTATGATTGGGC<br>TGTGGAGCTAGGAGGTCTGCACTGGGGTGGCATGGGCACTAG<br>GCGAGCAGCCAGGACTGTCTAGGAAGCCGAGAAGCCAGGGC<br>TACAGAGAGGGAACAGAGGGCAGTGGTGCCTGTTCTCACCC<br>ATCTACCATCACACTGTGTAGCCTTTGTGAGCTTGGCAAGGC<br>AGGAATCAGTCCCACTTTACAGATGGGAGGAATGCAGCTTAA<br>GACAAAAGTGGCCTTACCCCAAGTCACGGAGATAGTCAGTTA<br>TGAACGCGGGCGCCTGCCTTCTAGGAGTGCAGCACGTATCA<br>GGGCTCCTGGCTGGGACAGATGGGGTCCCTCCTCCGGGT<br>TCAGTTCCAGACTCAGCCAAGGAGAGTCAGTAGTTGGGGG<br>CAGTGGGCTCCACATCTGCAGGAATCATCCAGAGACTCTCGT<br>CCCACCAACCCAGGGCTGTTCCCTCCTCAGCTGCAGAGC<br>CTGGAGCAGGAGAAGGGGCGGTGGCGGGTGAGAAAGGCCAG            |
| MSTRG.24164.1 | 0.02 | 0.12 | 0.01857 | 2.522 | up | AGAAACCTACATATTGCATTTTTCTGAGTCTTGCAGTTTGTG<br>CTTTTGCTAGTTGTCTATCTATAACCTGTGTGTCCAGTTTGG<br>TAGCGACTAGCCACATATTTAACTTTTAAATATAAGTTAATT<br>AAAATGAAATAAAATAAAAAATTCTGTTTCAGTTGTACCAAAT<br>TTCAAGTGGTCAATAACCACACGTGGGTAGTGGCTACTATAA<br>TGGACAACAGATCTAGAGCATTTTTATCACTACAGAAATTTT<br>TGTTAGACAGTGTGATCAAAGCTGTAAACATTTAGAAGCTG<br>TTCTTATTTCTTCCCCTTATGCTTTTCTACTCTCACGTTCTT<br>TGCTTACATCATGATAGCTGAGCACATAAACATATATTATTG<br>GTTCATAAAACATTTTCATCATCAGATGATTATGGGACAGGCT<br>TTCCTAGTGCACACACCCATGTGAAATTATGTAACCTACCAC<br>CTGGCTGGGACATGAACCTAGCGAAAATCCATGGTCTTTTA<br>ACTGAGATCACATACCTGGTTTCAGGACTTAATGAGGCGCAG<br>GTTCTTGATGTCTTATCACAGAAAGAATTCAGTGAGAGACAA<br>AGTGATAGGTAAGAAATAGATTGATTTAGACAACACACTCCA<br>CAGAGTGTGGGTCATCTCAGAAGGCAAGAGGCCTCAGGATAT<br>GGGGTTGTTGGTTTTTATAGGGTGGGTAATTTTCATAGGCTG<br>AGTGAGGTGTCTTCTAGGTATTTGGGGAGGGGTGGGGATT<br>TCCAGGAATTTGGCCAGTGCTCACTTTTGGACTTTTGTATGGC<br>CAGCCTTGGTACTGTGATGGCACCTAAGGCTGTGTATGTGTC<br>ATTTATCTTGCTGATGTGTTACAATGAGCATATACTGAAGCT<br>CAAGGTTTGTAGTGGGAGTTGACTTGTCCGCATGTTGAACCTT<br>TTTGGTTCTAAATGTCATGTCTGGGCTATGTCATTCTTTTAA<br>ATGTTGTGCCCTTACTCTTTCCCCTCTGTTACAGTTGTAACA<br>TCTTTTACTTTTTGTTGTTTTTGGCTGTGCTGGGCCTTAC |

|                |      |      |         |       |    |                                                                                                                                                                                                                                                                                                                                                                                                                                                                                                                                                                                                                                                                                                                                                                                                                                                                                                                                                                                                                                                                                                                                                                                                                              |
|----------------|------|------|---------|-------|----|------------------------------------------------------------------------------------------------------------------------------------------------------------------------------------------------------------------------------------------------------------------------------------------------------------------------------------------------------------------------------------------------------------------------------------------------------------------------------------------------------------------------------------------------------------------------------------------------------------------------------------------------------------------------------------------------------------------------------------------------------------------------------------------------------------------------------------------------------------------------------------------------------------------------------------------------------------------------------------------------------------------------------------------------------------------------------------------------------------------------------------------------------------------------------------------------------------------------------|
| MSTRG.43629.9  | 0.03 | 0.2  | 0.03564 | 2.513 | up | <p>GCGAACGCTAGAAGCTGTGCAGGCCTTGGGGAGGCTCGCCCC<br/> GCACAGAGCAGCCTCTCGGCCGAGGCTCTGTGCTATCGCGCC<br/> TGGGCGCAGAGCTGGAGCTCCGCCGGTGTGAACTACTCGG<br/> TCCTTCCCAGTACAGGCTTGCAAGCACCCGCCGGCAGCCAGC<br/> CTCTTTTCTCCCGGTTCCGGGCATTGGGCTCCAAACCTGGG<br/> ACCAAAGTAAGTACCCGGAGCTACTGATCATGGGCTGTTTT<br/> CCCTGCGCTGCGGCTGTGCTAGGGAGCCAAACGCCAGGGG<br/> AAGCCCGCACAGCACATCCACCTGCCTCTAGGCGGGAGGACA<br/> GCTCCAGGGAAGGCCCGGTCTGGCAGGCGCTTTCTGGGCACA<br/> AACGGAGCAACACTCTGGCTGTGGAGCTGCCTCCCAAGCCA<br/> GGGGCACCGGGACCCTGATTCCCTCCGTGCGGCGCTTAGTCT<br/> GGGCGGGGAAGCACCAGCTTGGAATGCAGCTGGGGCGCTT<br/> CCTTTCCCTCGGAAAGAGCTCTCCCCGCGGGAGGCTTTGGCA<br/> GTGTGCACACCCCCAGCCCCTAAGCCCTCTGCAAGGACGCCT<br/> GGCTCCTAGGTCCGAAGGGAAGGCGAGAGCTGAGCTGAGGCA<br/> GCAGTCAGGCACTACTCACGGCTCCACACTCCCGCAGCCTG<br/> CTCCTTCTGGGCGGAACGCTAGAAGCTGGGCAGGGCTTGG<br/> GGAGGCTCGCCAGCACAGAGCAGCCTCTCGGCCGGGGCTCT<br/> GTGCTATCGGCCCTGGGCGCAGAGCTGGAGCTCCGCCGGTGT<br/> GGAAGCTACTCGGTCCTTCCAGTACAGGCTTGCAAGCACC<br/> CGCCGCGAGCCAGCCTTCTCTCCCGGTTCCGGGCATTGG<br/> GCTCCAAACCTGGGACCAAAGTAAGTACCCGGAGCTACTGA<br/> TCATGGGCTGGTTCCCTGCGCTGCGGCTCTGCTAGGGAGCC<br/> CAAACGCCAGGGGAAGCCCGCACAGCACATCCACCTGCCTC<br/> TAGGCGGGAGGACAGCTCCAGGGAAGGCCCGGTCTGGCAGGC</p> |
| MSTRG.174668.8 | 0.08 | 0.49 | 0.02622 | 2.495 | up | <p>CCGCCAGGCTCCTCTGTCCATGGGATTCTCCAGGCAAGAATA<br/> CTGGAGTGGGTTTCCATTTCTTCTCCAGGGATCTTTCCCA<br/> ACCAAGAATTGAACCTGAGTTTTGTGACTGCAGGCAGATT<br/> CTTTACTGTCTGAGCCACCAGGGAAGCCAGTTAGTTTTATGA<br/> ATTGGGTATTATTCTACTTCTGGAATGAGACTTGCAGAGGT<br/> TAATTTGTTAAGTGACTAATTCAAAGTACAAGTTCCATATG<br/> CCAAAATGGCCTGAAACATGCTTGTCTGGCTGCAGAGTTTAC<br/> GAGCTTCACTATCACATCACTACTGCCTGTGAACATCATAAA<br/> ACTTCCCCCGTTCCTTTTGTCAAAAAAATATATAGTGAC<br/> TCCTTTTTCTTCCCAAGTGAATAACTGGAACCTTTTCATCGT<br/> TAGTACAGTAATTAATGAGGAATGTTATGACAAAAACAAA<br/> CAAAACAAAAACCAATCACAGAGTGCCTTTGCCATGGAGTT<br/> TGTTTCTCTGTTCAGCTTTAATGAAGCCCTGTGAGGTACA<br/> TAAAGGAGTGTCTGCTGTTCAAATCACAGGACTTCTCTATAG<br/> TGAAACCTTGTAATCAAAACATTGCCTGCAAGCAGTTTCCAT<br/> AACTTATATACCTAAGGAGGAGTTTTTACAAATGAATTTAA<br/> GAATTTGTGAATTTGGTTAATAAAAAATCTAAGGCTCAGT<br/> CCTGAATGCAATAAAAAGCAAGTTGTAAGTATATCTTTAGGA<br/> TTAAAATGATGGCATGTGTCATTTTGCATTATTCTACAGGT<br/> CATCAAGACTTCCCCAGGTGTGATTCTCTTCCACCTTATTC<br/> GTCTTTATTTAGCAAAGCCCTGTCTGGCCCTTCTCGCTTGT<br/> CCCGCTGCTAGCCTTTTCACTAATCTTAAGCCTTTTAGTTCA<br/> TCAGTGATTATGCCCTAATTTAACATCCCAATAATAATAT<br/> CTCTACAGTCGCAGCCACTATCAAAATGGCCAGTGTATAAG<br/> TGCTGTCTATACTAACTTCAAAACACAGCCTTCAAAAGGT</p>     |



|               |      |      |         |       |    |                                                                                                                                                                                                                                                                                                                                                                                                                                                                                                                                                                                                                                                                                                                                                                                                                                                                                                                                                                                                                                                                                                                                                                                                                           |
|---------------|------|------|---------|-------|----|---------------------------------------------------------------------------------------------------------------------------------------------------------------------------------------------------------------------------------------------------------------------------------------------------------------------------------------------------------------------------------------------------------------------------------------------------------------------------------------------------------------------------------------------------------------------------------------------------------------------------------------------------------------------------------------------------------------------------------------------------------------------------------------------------------------------------------------------------------------------------------------------------------------------------------------------------------------------------------------------------------------------------------------------------------------------------------------------------------------------------------------------------------------------------------------------------------------------------|
| MSTRG.90991.1 | 0.05 | 0.35 | 0.01945 | 2.493 | up | <p>GTCGTCCCCTGCCTTCGCGGGCTGAGGCTGCTCCCAGGCG<br/> GCCACGGTCCCCTGACGTGCTCAGGACTCAGCAGACGGAT<br/> TTCCTGCGGGTCCGGCTGCCTCTATTCGAGGGGCGCCAGGAG<br/> TCCCTTCTGTTCTCCTCGGGCTCGGAAATAGAAAGGATGGTG<br/> TCCGTGTGGAGGCGCTGTGTTTCAGGGGTGTGAGACACGGAT<br/> ACATCTGTGTGAGGATCACAAAGCTGACAGATTGGTGCCCCG<br/> TGTGGCGAGGTCGACCAGATGGCCCCGACAGGTTGGGGATCTT<br/> GGTTAACATTTATACTGTAATTTTATCCACAGAGTATCAAAT<br/> TGAAGACGACCAGAGAAGGTGTTGAAATGAAGAAGTTTCTTA<br/> ACACACTGAGAAGTTGGGGAACCTCTCCTTCCAGCCACGAGG<br/> CCCTGCCCTGCAGCAACCGACCTGAAAACAGACCCCAGCC<br/> CCTGCAGCAATGGGCTCCAGGATTCAGTGCCTGGCCATAAC<br/> TGATGACTACAACTCAGTTAACTCTGTGAAAGAAAGTA<br/> AAGTTGCTCGGTCATGCCTGACTCTGCAACCCATGACTGT<br/> AGCCTACCAGGCTCCTTTGTCCATGGGATTTCCAGGCAAGA<br/> GTACTGGAGTGGGTTGCTGTTTCTTCCAGGGGATCTTCC<br/> CAAGCCAGGGATCCAGCCCGGGTCTCCAACATTGTAGGCAGA<br/> TGCTTTACCATCTGAGCCACTTAACTCTGACTAGGGATCA<br/> TATAACAACAATGTATCCTGCTTGAGGACAGTTTCTCCTTCC<br/> TGAAAACCTTCTGATTAATCCTGATATCTTAGAATGTATATT<br/> ATGGGAATGGGTCTGGTAGGATCTTCTGTAAATTCTAATC<br/> CTGTTATCCTAAAATGTTAATTGTGGGAGTGGGTCTGGTAAA<br/> ACTTTCACAACTTGAGACATTCTTTGATTTAATGTAGTAA<br/> CTAATTTAAAAGTATATACATCCCTTGCTAACACCATCAAG<br/> GGGGGGCACTCTCCACCCCTTCTGCTGTCCATGACAGAAGC</p> |
| MSTRG.30239.1 | 0.2  | 1.13 | 0.01448 | 2.471 | up | <p>CTTTTTAAGTAGCTGAACATCATGTCCAGTACTTTGCAAAAT<br/> TCTTTCAGATCCTCTACTGACAGCTCAGTAGAAACGTCACC<br/> ACAAGCCTACTCGGTTGCAGTGAGACAGGTTCTCATTTTGT<br/> TTTACCTCGGAAATATATCTACAATCCTGGCAAAGAATCAT<br/> TCTTCTCCATCACACTGCAGGACTTAATTTGGTAAAAAAGGA<br/> AAATTGAACTGCAGGACTCGCTTTTGGAGCCGAGTCTGCA<br/> CATAAGAAGTTTGCACGCTGTGAGGAAGCCCAAGTTACATGG<br/> AAAGGCCACATGTGGATTCTCCAATCAACAGCCCCAGCTGAC<br/> ATCCCACCCACCCAACAGCCAGATGGACCACCAGACATGTCA<br/> GCATCCAGCCCACAGCTGCTGAGTCACTTCCAGGCGTCAT<br/> GAGGCTCCAGAGCCAACCCACTGCCTTGTGGAACGTCTGAC<br/> CCCAGAATGCATAAGAGTAGTTATTTTAAATTTTTTTTTGG<br/> GGTGGGGGATCATTGTTACACAGCAGTAGTAACTGCAACA<br/> AACTGTAAAGCTCTTCTGGATCCCTGCCAATCTTATCTACA<br/> ACTCACATGCACTGAAATGCATGAACTTATATATAAGTCTTC<br/> CCTCTAATAATAACTGTTTTAGTACTCTTGCTGGAAAAT<br/> CCCATGGACAGAGGAGCCTGGAAGGCTGCAGTCCACAGGGTC<br/> CCTGAGGGCCGATACGACTGAGTCACTTCACTTTCCTTTT<br/> CACTTTCATGCATTGGAGAAGGAAATGGCAACGCACTCCAGT<br/> GTTGTTGCCTGGAGAATCCAGGGACGGGGGAGCCTGGTGGG<br/> CTGCCGTCTATGGGGTCACACAGAGTCAGACACGACTGAAGT<br/> GACTTAGCAGCAGCAGCAGTATCTTTTCCCTTCTGCTGA<br/> GTATCATTATGGAAAAGAAAGCCAAAACGCTAAAAGTTGCT<br/> ATATTGACTAATGTTTTATTGAAAGTCTTAAAAAATAA<br/> AAAAACTATTTTCAAGTGTGTGCAAGTCTTGTACTTTAT</p>      |

|                |      |      |         |       |    |                                                                                                                                                                                                                                                                                                                                                                                                                                                                                                                                                                                                                                                                                                                                                                                                                                                                                                                                                                                                                                                                                                                                                                                                                                |
|----------------|------|------|---------|-------|----|--------------------------------------------------------------------------------------------------------------------------------------------------------------------------------------------------------------------------------------------------------------------------------------------------------------------------------------------------------------------------------------------------------------------------------------------------------------------------------------------------------------------------------------------------------------------------------------------------------------------------------------------------------------------------------------------------------------------------------------------------------------------------------------------------------------------------------------------------------------------------------------------------------------------------------------------------------------------------------------------------------------------------------------------------------------------------------------------------------------------------------------------------------------------------------------------------------------------------------|
| MSTRG.25404.1  | 0.06 | 0.34 | 0.01259 | 2.464 | up | <p>GCTGGGTCTTTGCTGCTCGCTGGAAGTTGCTAGGACCTCTGG<br/> ACTGCAGTCTCCCATCTCTTGCTGACCTCTTGTTGACCTCTG<br/> CAGAATCCTGGTTGCTGGGAGCTTGTTAGTTCCTTGTTCCCT<br/> ACCCGGACCTCCTGTGGTAAATGTTTTCTCCTCTGTGGCC<br/> TGGTAAGGCTGGGTGGTCATTGGCATCCCAAAGGTGGCTAGA<br/> AGTCAATGATTTAGGCAGGCTTGTGAATAGATATGGGAGAAG<br/> GAAATGGCACCCTCCAGTACTCTTGCTGGAAAATCTCA<br/> TGGACGGAAGAGCCTGGTAGGCTGCAGTCCATGGGGTCGCTC<br/> AGAGTCGGGCACGACTGAGCGACTTCACTTTCACATTTCACT<br/> TTCATGCATTGGAGGAGGACATGGCAACCCACTCCAGTGTTT<br/> TTGCCTAGAGAACCCAGGGACTGCGGGGCTGGTGGGCTGC<br/> CGTCCATGGGGTCACACAGACTCGGACACGACTGAAACGACT<br/> TCGCAGCAGCAGCAGCAGCAGCAGCAGCAGCAGCAGTGCATA<br/> GATATCAAAAAGGGTTTAGAACAGTCAGGTAGGATCACACAAG<br/> TCACCGTGAAGCAATACTTCTCCACTTAGCCAAAGCTAACAA</p>                                                                                                                                                                                                                                                                                                                                                                                                                                                                                     |
| MSTRG.133982.9 | 0.03 | 0.18 | 0.01699 | 2.458 | up | <p>TGAGGAAATAATGTTCTTAACTTAGTGTGACTGGGACCGCC<br/> TAGTCTCTGGATCTTTTCTTCTCCTGTGATTTGAGAACCGG<br/> GGAGAACAGGCTCCCCTCCTGTTCCCTCAAGCCTGTTGTGCAC<br/> ACCAGGATCAGTGTCTCGCCCCTGGACTCCAGTAGGGGGCA<br/> GCCTTTTAATGGCAATAATTCAGATGCCCCACGGAGGGAGGG<br/> TATAGTGAGGGTTGAGGAGAAGGGGGGGGTTGTGGATTAAT<br/> GAGGTGCACAGATGCTGAGAGGTGGGGGCTAAGCAGGACACC<br/> CTTAGATCAGATAGCCAGGGAGGGAGGCTGTCTCCAGTCCCC<br/> TGCCTGCCGCTCCTCCTCTTTACTGGAAAAGGATCCAAATG<br/> CAGGGCTTTGAAAGTTTGTGAATGACTTAGGACAATTTTGT<br/> TAATGTGTTCTTTTCTGGAGGATTTCCCTCCTGGAGGGATTT<br/> CAGATTTCTCTCATGGGACAGTGAATTAGGGGATGATTTCC<br/> TCACTCTTCAGAGAGGGGAATGAACTGGAGTAAATTTGGTTT<br/> CCTTGTCTTCCATTCTTCCCCCTAACAGACAGTGGGTGTGG<br/> TTATCCTCTGCCGAGGTGTACAGAAGGGTTCTTTGCCACT<br/> ATTGTTAATCTGTGTGTGTGTGTGTGTGTGTGTGTGTGTGAG<br/> AGTGTGAGTGAGTCGCTCAGTCGTGTCTGACTCTGCGAACCC<br/> CTGGACTGTAGCCCCCAGGCTCCTCTCCTCATGGGATTCTC<br/> CAGGCAAGAATACTGGAGTGGGTTGCCATTCTTTTCTCCAGG<br/> GGACCTTCTGACCCAGGGATCGAACCTGGGTCTCCTGCATT<br/> GCTGGCAGATTCTTTACTGCCTGAGCCACCAGGAAGCCCCT<br/> GGGTATTGATAATCTGGGTCCAGATGATTTTGTGTGGGG<br/> GGCGTCTGTGCATCGTAGGATTTTTAGTAGTGTGCTGACC<br/> TCTGCTCGTGAGATGCTGGTCGCACTTCCAGTCATGCCTAC<br/> CAGAATTGTCCCCAAGATGTGCCCTGGGGAGCAGCATTGCC</p> |

|                |      |      |         |       |    |                                                                                                                                                                                                                                                                                                                                                                                                                                                                                                                                                                                                                                                                                                                                                                                                                                                                                                                                                                                                                                                                                                                                                                                                                                            |
|----------------|------|------|---------|-------|----|--------------------------------------------------------------------------------------------------------------------------------------------------------------------------------------------------------------------------------------------------------------------------------------------------------------------------------------------------------------------------------------------------------------------------------------------------------------------------------------------------------------------------------------------------------------------------------------------------------------------------------------------------------------------------------------------------------------------------------------------------------------------------------------------------------------------------------------------------------------------------------------------------------------------------------------------------------------------------------------------------------------------------------------------------------------------------------------------------------------------------------------------------------------------------------------------------------------------------------------------|
| MSTRG.72224.16 | 0.04 | 0.21 | 0.03374 | 2.441 | up | <p>GCTTGGGTTTGTTCATCAGAATAGCTTGAACGCCATCATTCTC<br/> TAAACTGACCAGACCTTTACTCAAACCTGAAACTCCTGTACTT<br/> ATCTGATGTTTCAGAGAACCTGAAAGAGCTTAGTGTGTGTTCC<br/> CTCTAGTTGGACATTTTCAACAAGAAAATGTCTAGTGTGTC<br/> AACACGTGGCCCTGTCCCTGGCTGTCTCTCTAGATCAGCCAT<br/> GAAGAGGTTGGGTTCACTCTCCACCCATCACTGAAAAGACCA<br/> CACTGTTTACACTTCTCCTTCCAGAGAAAATGTTTGCTTATCC<br/> CTACTTCTGTTTTCTGGTCCTAATCCAGATCTCTGTCCAAGA<br/> TAAATATTCTATTGGCTTCACACTGTTTTATCCTCGTTAAAA<br/> ACGAATGACCAGATACCTGCAGTTCATAGGGTAAAATGTTA<br/> ATGGTGATTTCAGACTCGGATGAATAAATGAATGCTTGTTTTG<br/> CTTTCTCATGTCATAGTTTTAAAAAAGAAGCCACCTAAGTTT<br/> ACTTGTGCATGAATGACATATACTTACAACCTCAGAGGGCTC<br/> TCAGATGTCTGTTCCCTCTCATTGAAATTTGTGGATGTCAGT<br/> TTGAGAGAAGTGGGCTGACTAGGACTTGAGAGTTATGCATT<br/> TCACCATAAATTGTGGCTGCTTTCATATGGTGTGAGAGTT<br/> GACAATGTTTTTTAAGTTTTTTAAAATAATTTTTAAATTTA<br/> TAATTGAAGGATAATTGCTTTGTAATATTGTGTTGGCTTCTG<br/> CCATCCATCAACATTAATCAGCCACAGGTATACATATGTCCC<br/> CTCCCTCTGAAGCTTGCTCCACCTCCCACCCATCCCACCC<br/> CTCTGGTTGTCCCAGAGCACCAGATTTGAGCTTTCTGAGAC<br/> ACACAGCAAATCCCTCTGGTTATTTATTTAAATATGGTAA<br/> TGTGGCTTTAATTTCCCAAAGCACATAGCTTAGTTTGGGAGG<br/> AAGCTCCAATAGTCATTCTCTGCAGCCTTATTCCATGAGAG<br/> TATTGCCCCGTCTCCTAGTAACAAGTTACCCAGCATCAGAGG</p> |
| MSTRG.215929.3 | 0.12 | 0.66 | 0.02301 | 2.427 | up | <p>AGTTACTTGATAAACGTGTTTTATTAGGCGGGTGAGCAGAAAC<br/> TTAAGCTTAAAGTCCTCAGCCGGGAGAGACTGCTGAGTAGGG<br/> ATGAGAAGCAAGTGGTGCGGGAACCCGGCGCTGCGGGGCGCG<br/> AGGACCCCCAGCGGCCCAAGTCCACCCGGACACGGCTTGGGG<br/> AGGACGTCGAGCGCCCCCGCCTGCCTTCTGTGCCCCACC<br/> CAGTCCCAGCTCTGGAAGACATCGCTGGGCCGCGGAACCCC<br/> TAACGTCTGGCCTCTCGCGTAGTGCAGTGCCAACTTTCCA<br/> GCAGGCACAGCTCTCCAGCGCAGCTTTAACTCGAAGCTGC<br/> GAAGAACCGGAGTCAATTTGCTGCCCGAAAAGGTGCACACG<br/> TTTCCATTTCTGAGTTTGCAGTACTGGGTCTGCAGACCAA<br/> AGCAAATGTATGACTGTGCTCCTCTAGTTCTCCATATCCATG<br/> ATTATACATTTCTCTCCGCTTTCCAGTTTGCAGTTGCACT<br/> TCGCCAAGCCAAGTACAACTATCAATTTTAGAAGAGTAATT<br/> AAGGGCGGGGAATACACACCTGAAGATGTGGGCGGGAGCGGT<br/> GCGGGACTGAGGCCTGGGGATCCTTCTCCGAAAGAGGCAGC<br/> CGGAGAAACTCGCCCGGTTCTGAACACCTCCCAGTCCACGG<br/> CGGGGGCGGCCACAGGGAGGACGCGAGTGCTCTCCTGCCGC<br/> GCCACCCCTACCATCTACCACCCTTGGCTTCCAGGAGTGTTG<br/> GCAGTTCTCTGCCTCTGGCTTCACTGCTAAAGCCGCAGCACA<br/> ACAGAAGTAGCTGCTTACTAGTAAACACTGCAGACTCTGGCC<br/> TGAAACGGCACGTGGGGCCACGCCAAGGAACTTTGGCAGGA<br/> CTGATCCAACCTACCTGTAAGAAAGAAAGGCAGAACC GCGAGG<br/> GAGGGCTGCGTTGGTGC CGGTCACTCGGTAACCTAGGGCTTT<br/> GCAGAAAAGAGAGGTCATTGGAACCACAGCGAGTGGGGAGA<br/> GGAAGACTTCTTGAAGGCATGAGA ACTTCTCAAGCTTCCAG</p>         |

|                |      |      |         |       |    |                                                                                                                                                                                                                                                                                                                                                                                                                                                                                                                                                                                                                                                                                                                                                                                                                                                                                                                                                                                                                                                                                                                                                                                                                                              |
|----------------|------|------|---------|-------|----|----------------------------------------------------------------------------------------------------------------------------------------------------------------------------------------------------------------------------------------------------------------------------------------------------------------------------------------------------------------------------------------------------------------------------------------------------------------------------------------------------------------------------------------------------------------------------------------------------------------------------------------------------------------------------------------------------------------------------------------------------------------------------------------------------------------------------------------------------------------------------------------------------------------------------------------------------------------------------------------------------------------------------------------------------------------------------------------------------------------------------------------------------------------------------------------------------------------------------------------------|
| MSTRG.168241.2 | 0.21 | 1.26 | 0.03299 | 2.403 | up | <p>TACTGGAGTGGTGTGCCATTGCCTTCTCCGGAACATATGTAT<br/> ACCTATGGCCAATTCTTGTTTCATGTATGGCAGAAACCAACAC<br/> AACATTGTAAAGCAATTATCCTCCAAGTGAAGATTTAAAAA<br/> ATCATAATTTTTCCCTTTAAAAAATAGCTTTGATGTATAA<br/> TTGACATAAATTTGTATATATCTAAGGTCTATAGTGATGTTT<br/> TGAGCTATGTATACATTGTTAAATGGTCACATAATTAAGCTA<br/> ATTGACATATTCATCACCTCTACATAGTTGCTATTTGTATGA<br/> ATGTGTGCTGTGTATGGAAAGATCTAAGATCTATACTCCTAG<br/> AAAATTTCAAGTATACAACACAGTACTGCTAAGTTGTTGTCA<br/> CTATAACGGACATTAGGTCTTGAGAACTGTTTCATCTTGCAA<br/> AACAACTTCATACCTTCTGGTTACAAGTAGTCTCTTGGCAG<br/> TCAGATTTGGTGGTTGAGACACGGGCTGGGGAAGCCAAGTGT<br/> CTGATTTGTCCTGGTGTACCATTTACTGTGGCTTTGGGGAA<br/> ACTAACCTCTTCCCTCTTTTATCAATAAAGTTGGATAATTAT<br/> AAAATCTGTTACTATTGTGAGTCTGAAATGATAAATGGCTTA<br/> CAACAGTGTCAAAAACAAAGTACTCAATAAATGCTAGTTTTT<br/> ATTGTCATTATTATTGTTAATGTTAAAAGTAGTAGATGTATA<br/> AGAGAAATAACTAAATTTAACATCTCCTGATGGGGACTTAGG<br/> GCTAAATGTTTTTCTGCTGCGCATCCTGATCTAATCTGACCA<br/> GGGTAGTGGAGTAAGAGCTTTTTGGCAAAAACACTTAAGCT<br/> AATTTACAAGTCTTGTTCAGTGTTAAGTCGTGTCCAGCTTT<br/> TTGTGATCCAGTGGACTGCAGCATGCCAGCCTCCCCTATCCT<br/> TCACTGTGTCCAGGAGTTTACTCAGATTCGTGTCTGTTTCAGT<br/> CAGTGATGCCAGCCAACCATCTCATCCCCTTCTCCTCCTGCC<br/> CTCAATCTCGCCCAGCATCAGGGTCTTTGCCAATGAGTAGGC</p> |
| MSTRG.65420.2  | 0.05 | 0.3  | 0.02933 | 2.392 | up | <p>CAATAAGGGCTTGAAGGAAGTTTTCCAAAGAAGAAAGATTTT<br/> CACTGTGTGCCTTCCCCATTCCCTTCCCAGTACCATTCCAC<br/> AAACACAGGTTTTAAAAAGAAGAAGAAGAATGAAGACTTT<br/> GTGAAATAGCCTGTGGACTATTAAGGGAGAGGGGTAGTGCA<br/> GGAAGGAGAAGGGGCAGGTCCACCTATGACATGAGCTGAAAA<br/> AGGATTGGCAGAACCTGTCTGACTTCCCATGTTAAAGACCT<br/> GCTGGGGAGTGAAGAAAAGCGGTGCCGGGGCAGTGTCTGG<br/> GCGGCCACACAGCAACGCTCTCAGTAGGAGACGAAGCTCTT<br/> AGTGGATTGGCTACCTTCCACCATGGTGGTGGCTCTGAACTG<br/> GTTTAGCAACCTGAGGACCCTGAGAATATCTGGACTGGAGAC<br/> TCCCTCCTAAAGAATGGCTTTGAGCAATCAGAGACAGGAAG<br/> GACTCAGCAGGCCAAGGGACAGAGCGGCATCGCCAAAGAAAG<br/> AAGCCCCATACCAGCAAGTCTCACGTGGTGTCTGACATGTAG<br/> CAAGTAAATAGCAAATACCATTGAAGGAGCTGCTACAAGAAG<br/> CTGTCTCCACCTAGACACACCCCAAGTACCGTCTCAGAAAAT<br/> GCTCTGTGCGAGAAGCAAAGGCCTGAAGATCCAAGGACCCCT<br/> TCATCAGAAATCTTGCATCTTTTCCCATAAAAGAATAGAA<br/> GGCTACTTGATGAGCTCCACTCTTAATGGTAACAAGGGGTTA<br/> ATGCTTCCAGTTTCCATCTCAAAAGGGAAAATAAAAATGCC</p>                                                                                                                                                                                                                                                                                                        |

|                |      |      |         |       |    |                                                                                                                                                                                                                                                                                                                                                                                                                                                                                                                                                                                                                                                                                                                                                                                                                                                                                                                                                                                                                                                                                                                                                                                                                                     |
|----------------|------|------|---------|-------|----|-------------------------------------------------------------------------------------------------------------------------------------------------------------------------------------------------------------------------------------------------------------------------------------------------------------------------------------------------------------------------------------------------------------------------------------------------------------------------------------------------------------------------------------------------------------------------------------------------------------------------------------------------------------------------------------------------------------------------------------------------------------------------------------------------------------------------------------------------------------------------------------------------------------------------------------------------------------------------------------------------------------------------------------------------------------------------------------------------------------------------------------------------------------------------------------------------------------------------------------|
| MSTRG.108023.1 | 0.09 | 0.46 | 0.02613 | 2.391 | up | <p>CAGGGATGGAACTCGCATCTCTTATGTCTCCTGCATTGGCAT<br/> GTGGTTCTTTACCACTAGCGCCACCAGGGAAGTCCACCAT<br/> TATGGTAATATATGACTATGCTATAACAATTATATTAACCTGG<br/> ATTCTATGATGAAAAATAGTGGGAGAATCTAGTGAAGACTG<br/> AGGGAGAGGAATCAGACAAGCTGGTGAAGTCTGAAGGATGGG<br/> TCTGCATTAGCCAGGAGATCAATGAGGAAGAACCTTCCAAGA<br/> GCAGGAAACAAGCGTGGATTAGAAAAGGCCACTGTGGAACCTC<br/> ACATCAGGGGAGGAGGCAAAAATGAGACTGGAAATGCCAGCA<br/> GAATTCAGATCTTGCCACGTATTGTGGGCAATGCGGGATTCC<br/> AGCTTCTCTTAAGGGCACTGAGAAGCCAGTGGAGTATTTTAC<br/> AAATAGAGGTCCATTGATCAGATCTGCTTTTTTAAAAAGATC<br/> ACCCTGGGAGCAGGCAGGAATCACACAGCTCAGCAGGCAAAA<br/> ATCAAGGAGCTGAGCACGCACGAATCTCGCAGCTCAGCTGGC<br/> AAAAATCAAGGAGCTGAGCAGAAAAAAAAAAAAATAAAAA<br/> ATAAAAAAGATCACCTGGTTTACTTATTCAGAATAGAGTAGA<br/> AAGGGCAAGAGTGGAAAGGAGCAGCTGGGGGCCAGGGTTTG<br/> CTAGAGTGGTCCAGGCAGAGATGAGATGGCAACCAATGGATG<br/> GAGTCGAGGGGCCGTCTGGAGGCGAAGATGACCAACGGGCCA<br/> GAAGGGGTGAGGCATGATGGGGGCACACTTCTGTGCACTT<br/> CTGCCCTGAGCACTCTCCACAGAGCTTCCAGCGATGTTCTAG<br/> AACCTGAGGCCCGGGAAGGCCCTTTCTACTTGCTGAGTG<br/> ATCCAGAAAAATATGAAAACCTCATTATATGTTGCTGTGA<br/> GCCCTATTTGGCCTGAGGACCATGGGTACATCTAGATTA<br/> ACCTATCCTTAAGCTCACATCAATTGAGAGAAGGGTGAAGCA<br/> TTAAGAGTTAGGAGAGGGCTGTTGGGCAGGAGGTCTACAGAG</p> |
| MSTRG.81336.3  | 0.08 | 0.43 | 0.02618 | 2.361 | up | <p>CTCAGCTCCGCTAGCCTCTATTTATAGAGCCCGGAACCCGAA<br/> ATAGCGCGGAGCCGAGCGGCCGGGATGACGCGGGAGCCGCCG<br/> GGGGCTGACTACCCGGCCCGGAGCGGCGGCCCGGATGGG<br/> GGACAGTGGAGGCGCTGGACTCGACCCACGCCATTCCGGGC<br/> ACCTCTTCTGCTGGGACGTCCAGGTTTCCACGAGGCACTGT<br/> GGTTGGATACGCAGCAAAAAGGAGGATCTGCAGCACGAGAGA<br/> CTGAGGAGATCTTCTCAACCCAGGGATCGAACCTGCGGCTCC<br/> TGTATTAGCAGGCAGATGCTTTACCACTGAGCCATCTGGGAA<br/> GCCAACACCATGTTAGAGATGAAGAACTGAGATTCAAGGA<br/> ATACCTTACATGTCCTCAGAACTGTCTCCTGAACCAGGTACC<br/> CTGGCCCCGAGATGTTTCAAGTCCCAGGACTGTGTTTGT<br/> TCCTATTGGACCGAAAAGTCCAACCTGCAAAAATATCTCAACAC<br/> ACTGAGCACAGAAGCAGAGGTGAAGTCCTAGCTATCTTCTGT<br/> CTAGCCAGACATTAAGTAATTTGTA AACATTGCCCTCTT</p>                                                                                                                                                                                                                                                                                                                                                                                                                                                                                                                                             |

|                 |      |      |         |       |    |                                                                                                                                                                                                                                                                                                                                                                                                                                                                                                                                                                                                                                                                                                                                                                                                                                                                                                                                                                                                                                                                                                                                                                                                                                  |
|-----------------|------|------|---------|-------|----|----------------------------------------------------------------------------------------------------------------------------------------------------------------------------------------------------------------------------------------------------------------------------------------------------------------------------------------------------------------------------------------------------------------------------------------------------------------------------------------------------------------------------------------------------------------------------------------------------------------------------------------------------------------------------------------------------------------------------------------------------------------------------------------------------------------------------------------------------------------------------------------------------------------------------------------------------------------------------------------------------------------------------------------------------------------------------------------------------------------------------------------------------------------------------------------------------------------------------------|
| MSTRG.133252.10 | 0.05 | 0.24 | 0.02217 | 2.345 | up | <p>CCCCATCCTCGGCCCTGCTCTGTTCTTGCCTCCCTGCCGGG<br/> TCGGGATGCGGAGCCGGCAGAAAGTGCACGCGCTCTGCCTGG<br/> AGGCGGTGAGCCGCGCCGGCGCGCCGGGCTCGCTGCAGCCA<br/> ATCGGCGCGCACCGCGGGTACCTCCCCGGGCCAGCAT<br/> AAATCGTCAGGTTGCCCGCCGCGGGTCTCAGTCTTCGGGGC<br/> TAATTAGCAGAGCCGGTTCATGAGTGGCGGGACGGCCTCCG<br/> CGGGCCGGGAGCGGCGGGCGGGCGGGCGGCTTCTCGGGG<br/> GCCGAGACCTCCCTGCACCGCGGGTAGACGGCTGGCGCGGCC<br/> GCTGCCCGAGCCGCTGTCCGGCCCGCTTCCCCGACCTCGG<br/> CCGCTCGGTGCCCGACCCGAGAGGGTTAGGCTGGCCC<br/> GGGCGAGGACCCGCGGGCCACCCTTCCCCTCGGACC<br/> CTCGGCTCCGCTTCCCGGGCCGAGGCGCAGCACATCCCGC<br/> CTGCCTGCGGACCTCAGAGGCGCCTTCCCGGAGACTCTGAA<br/> CTTCTGAAAATCCCGAGACCGCGTCTGGGTTTTGTTTTGT<br/> CTCAACTTGGCTTGGGATTCTCTGGCCACTGGATACTCC<br/> GTTCTCTGTGGGCTCAGATGCCAGCTTGAAAACTCTC<br/> ATACTGTTATTGTAACAAAGGTAAGAACCCTTAAATCTGA<br/> GTGGCAGCTTTATTTCCCTATCTGTTCTGTTGTCTTTGCCT<br/> TGAATGAAAGCAGAAAGAACAATGGTCACCCCTTACCATTCT<br/> GGAGCTCCAGTTCATAATTTGTATTTTTGCTTGAGACAGAAT<br/> CTGTGCTCTCATGATGTATCCAAAACAGTTTATTGTGAAAG<br/> AACACATTGAATCCTTATTTAAATTGATTTGCCTAAGAAATG<br/> ACTACGTCTCTGTGACTTTCATTTAATGTAGGAAGTGATCAT<br/> GGAGAATAATCATTCTCAAGATGCCTTAACTTTATTGTTAGT<br/> TATCAACTACCCAGCAGTTGGAGAACGATAAATAGCTGGTTT</p>                          |
| MSTRG.145823.1  | 0.04 | 0.2  | 0.02361 | 2.331 | up | <p>CGGAAGAGAGAACAGGGCAGCAAGAGCCACAGCACGAGGAC<br/> GGAGGTGGGGGAGGACCCGGGGGCACAGGCAGGCAGAGCACG<br/> GACGGGTGTGTGCCTACTTCTGGGACAGTGAGGGGCGACA<br/> GGTGGGAAGGTGAGGCCCGGGAGACTGGAGACGTTCTGCT<br/> GGGAAACGAAAGGTTCCAGGACATGCACAGTTACCATCACA<br/> GGCCAAGGACACCTTCCACCTCGGACACGGGGCAGACCCCA<br/> GACCTCAGACCTCAGCGCAGTGGGGAGAGGTGAAGGGAAGCA<br/> GACCGCAGCTCAAGGTGAAAATGGAATTGGCTTCCCTGGTG<br/> GCTCAGACTGGTAAAGAATCTGCCTACAAAAGCAGGAGACCCA<br/> GGTTCAATCCCTGGGCCAGGAAGATCCCTTGGAGAAGAGAAT<br/> AGCTACCCAATCCAGTATTCTTGCCTGGAGAATCCCATAGGC<br/> AGAAGAAACCCGAGCGAGGTCCCAAAGAGTTGGACACAAT<br/> GAGCGACTAACACTTTCACCTTCTGACAGGTGGAGAAAAAGG<br/> ACAAGCAACAGGATGATTGGAAAAGTAACTCAAAAGCAAACG<br/> TCTTACCACCAGGACATCACTGAAACACAAGGCAGAAAGCC<br/> TCCGAGATCCAGAAATGACACGCTCTCAGGAAGCAAATGATG<br/> GCTGCCATCACCAGGCACCTCCATTAACAAGCTCAACATCAA<br/> CCCTAAACATTTTTTATCTTTTCAAAAACCAACTGAGGCC<br/> AGAACTGTCAAAGCAAGCAGGCATTACACATTGTGTTCAGA<br/> GTATGAATCACTCAAGTTGCTCAGTCGTGCCGACTCTTTGT<br/> GACCGCATGGACTATAGCTACCAGGCTCCTCCATCCATGGA<br/> ATTTCCAGGCAAGACTACTGGAGTGGGTTGCCATTTCTTC<br/> TCCAGTTCAGAGCATGACCTTGCCGAAATCCTGAAGGCTGGG<br/> CAGCAAGGTTAGAGCACATTATTACACACTCCTATCTCCCAA<br/> GTGCTCTGGGAAGAAGGTGTCTAGGTTAACTGTCTGGTTAGC</p> |

|                |      |      |         |       |    |                                                                                                                                                                                                                                                                                                                                                                                                                                                                                                                                                                                                                                                                                                                                                                                                                                                                                                                                                                                                                                                                                                                                                                                                                           |
|----------------|------|------|---------|-------|----|---------------------------------------------------------------------------------------------------------------------------------------------------------------------------------------------------------------------------------------------------------------------------------------------------------------------------------------------------------------------------------------------------------------------------------------------------------------------------------------------------------------------------------------------------------------------------------------------------------------------------------------------------------------------------------------------------------------------------------------------------------------------------------------------------------------------------------------------------------------------------------------------------------------------------------------------------------------------------------------------------------------------------------------------------------------------------------------------------------------------------------------------------------------------------------------------------------------------------|
| MSTRG.114102.2 | 0.03 | 0.25 | 0.03996 | 2.328 | up | <p>GCGAAGGAAAGCTGGGGATTGCTCTCGAGTGACTGCAGGGCC<br/> AATAGACCTCATCTAGGCTTGTGTCCAGAAGCCAATGTTTCCT<br/> CTCCAGGGGCGACAGGGATCTCGGGGCTGCATTCCAGACGCA<br/> CCCGGGGAGACAGGCATTCATCTCGAGTGAAGCAAAGAACC<br/> CCGCTCTGCTCTCGAATCGCGACGGGTATCTCTTGGAGCTCA<br/> CTGGGTGGACTCAAGGGAGTCAAGCCTCCTGAGGCGTTTGA<br/> GAGAGGTGCGGAGATTGGTCGCTAGGCCATGCAGGAGACGAA<br/> GGCCATCATCTCTCGATGACGGGGGAATCTCGGGGTTGTTCT<br/> CGAGCGGGCGCCCAAGTGTGCGGTTTCTCACGAGGTACGACG<br/> GCGAGGTGAGTGCAGCCTCTCGTGGGGCGCCAGGGAAGTCGGG<br/> TCTCCACGCGAGTGGCGAGGGGAGCGCGTCATTGCTCCCGA<br/> GCCATGGTAGGGGAATCTGGCCTCGAGACGTGTTGAAGAAGG<br/> TCTCTCGAGGTCTTTCTCGGGTTGAGGCAGGAAACCCTGGGT<br/> TCCCTCGACTTGTGCAGGTGACCTCAGGGGCTTCTCACGGT<br/> GGCTCTGAGAAGTCAGGAAACTGGAGGTGGGAGGGGC</p>                                                                                                                                                                                                                                                                                                                                                                                                                                                                                |
| MSTRG.68681.6  | 0.03 | 0.15 | 0.03948 | 2.313 | up | <p>GCTCGCCGACGGGCGGCAACCCCAACCGAGCGCTAATAAAA<br/> ATCGCCGACAGAGGCGCGGCCCTCGCGGGCTTCTTCCCTAG<br/> GGGGCGCTGCGGAGCGCGGGCGGAGGCGCGCGCAGGCGCG<br/> CGCGCCAGGCCTCGGACTCTTTTGGCCCTCAGGGCGGAAG<br/> GAACGCTGTGCGCCAGCGGAAGGTCCTTGCTATCCGAGG<br/> CCTCAGCGGCCCGGAGCGGCCCGCCCTTAAATCTTTTC<br/> TGAGCGGGCGTTCGCGGACGCGAGCCCTTTTGGATGCCGC<br/> GGAGGGTGGCCCGGGTTTCAGGGCTTCCCGCCTGCGTC<br/> GAGGGGAGTGGGCGTTGTCCGTGGTAAAATAAAACTGGGAA<br/> GGGATCTTCGCCCAGTTGGCGCTTCTCAGCGCGCTGACCTG<br/> TGGTCGAGGCTTGGAGCCGACCTCTGGAGAGGGCAGAGGCC<br/> CAAGCGGAGATCAATACTGAATGGATCAAAATCGGAAAGAAGC<br/> CTCTCTGGCCAGAAAAAGAAGAAATAACATCCTTAAAGGAGG<br/> AACGTGTAATCAGGAATTGAGCCAAGAAAAGCATGGGAGGA<br/> GAAGAAACCATTAATGAGAAAGGAGCAGAAGAAACAAAAGCA<br/> GAGAGGGATTAAGTATGGAGCAAGACTTTGGAGATGGAGCA<br/> ACAAGGACAAGATGGCTGGATTGGTCTTGACCAAGAGGTGGT<br/> ACTCCTCATCCTGAGGCTAGAGAAAGCTAAAATGGAGATA<br/> CTTATACAGCAAGTTTGCAGGAGTGGTGGTTGGACATTTGGG<br/> GTATTTTATAAAGGTATTCTTACCTGTGAAGTAAGGGTCAAG<br/> GTCATCTGCTGAGATGGCATCTTGTTACTGCTGTTTTGGAAT<br/> TGAGGTATTTGAATTAAGTAACTCAGTTTATTTAAACCCTAGTA<br/> AGAATTTTGTCTACTTTATTCTATTTACTTTATAAACATTC<br/> TACTTTCCACAACCTATGCATTTTAAATTATTTTCATCAATG<br/> TTTTGTTATGAAAATTATCAAGCATACAGAGAAGTGGAAAGA</p> |

|                |      |      |         |       |    |                                                                                                                                                                                                                                                                                                                                                                                                                                                                                                                                                                                                                                                                                                                                                                                                                                                                                                                                                                                                                                                                                                                                                                                                                                                                                                                                                                                                                                                                                                                                                                                                                                                                                                                                                                                                                                                                          |
|----------------|------|------|---------|-------|----|--------------------------------------------------------------------------------------------------------------------------------------------------------------------------------------------------------------------------------------------------------------------------------------------------------------------------------------------------------------------------------------------------------------------------------------------------------------------------------------------------------------------------------------------------------------------------------------------------------------------------------------------------------------------------------------------------------------------------------------------------------------------------------------------------------------------------------------------------------------------------------------------------------------------------------------------------------------------------------------------------------------------------------------------------------------------------------------------------------------------------------------------------------------------------------------------------------------------------------------------------------------------------------------------------------------------------------------------------------------------------------------------------------------------------------------------------------------------------------------------------------------------------------------------------------------------------------------------------------------------------------------------------------------------------------------------------------------------------------------------------------------------------------------------------------------------------------------------------------------------------|
| MSTRG.185825.1 | 0.08 | 0.42 | 0.04045 | 2.313 | up | CGCATGCGCATACAAAGTTGTGCGCTGACCAGGAAATCCTTC<br>CGATCTCGCGGTCCCCTGTGTGAGGAAGGTGAAAGGGTGT<br>GTTGTTTCTTGATACTTTAGGACAGTTACTTTAGAAGTCGC<br>TGTTGTTACCAAAACGCCAGGTTGATAGTTCTTCTTCAT<br>AACCTTTTGTTCACCTGGTGTGAAACAAAAAGGTGGGTCT<br>AGGTGAAGCTTTTACTTAGAAGCGGCCAAGTTGGAGCACTAT<br>GTGCGAGCAGTTGGCAGGCATACTGCTATCAAGAGGTCTGAA<br>CTTTGCAGGTGGCTCAGTGGTAAAGAATCATCCTGCCAGTGT<br>AAGAGATGCAGGTCAATCCCTTGATTGAGAAGATCCCTTGG<br>AGAAGGAAGTGGCAACCTACGCCGTATTCTTGCCTGGGAAA<br>TCCCATGGCCAGGAACCTGGTGGTCTACAGCCCATGGAGTCA<br>CAAAGAGTCCTTATTTAGGACTAAGTACTAAATAACAACAA<br>TACCTAGCGAGTAAAGTGCTAAGAGATCCCTGAAGCTTCTTG<br>AAATTGCTAGAGTAAAATTTCTTGTATGGTTAGGGATGGGA<br>ATGGACAAGTTTGTAAAGGCATAATAAAATTTAATTTCAAAG<br>AATTTATTATCTGTTTATTTTGGCTGTCTCAGGCCTTCTTG<br>CTGTGAGCGGGGGCCGCTGTGTGATGACAGCGCTTGGCCCT<br>CACCGCGGTGGCGTCTCACAGGGAGAGGGCTCTGGGGTGTG<br>AGCGTCCGCGTGTGGCTCTCAGGGTGTGGAACGCAGGCTC<br>AGTAGCTGTGGCCACGACTCAGTTGCTCCAGGGCAAGTGG<br>GATCTCCCTGGATTAGGGATCGAAGTCATGCCCCCTGTGGTG<br>GCAGGCGGATTCTTAACCACTGGACCACCAGGGAAGCCCTG<br>GTCCCGTCATTTAGAACACATATTTGATGTCTGGCCACCG<br>TACTAGTATGGAAGTATAAGTTGAAAAAATGTAGGGCACTTT<br>TTTGCCAGTGTACATAATAAAAAATATCTAGTAATGTTATTT<br>CACTGGACACAGTGGAGATGTTTGAAGTTATTAAGTCCATGT<br>TCTGTCTATGTCAGTATATTTACGCTTGTGAATGGCGTGTG<br>CACTGAAGTACCCTCTCCTCTCACAAGAAGCATCTTCCAGAA<br>ATCACCTCACCCAGATTAGCTGGCCGATGACCACAGTGACA<br>TGTGCTTCTCAGATAACACATGACATTCTATTTGGCTCAGAA<br>CTTAGTGGCTGGCTCTGCTAAAAATAAGTCTTTAATGGTTGA<br>TTAGGACATTCATCACGGGGTGTAAATTCGGGAGTTTCT<br>TCGTGTCATGAAACATATTTATGGACGGCCACAGAGTGGATG<br>CACCTCGTTTCTTGATGAAATGTGATAAGGATTTCCAGAGAC<br>TCTTTCCCGGAAGTTCATTGCAGAGTACGGAGCAGTTCCC<br>CGCGCTCTTTCGGGCCTTGTGGCCATCTGCTCAGCATGCGG<br>TGGTGCCTGTTCCAGTTCCAGCTTACCCTCCCCGCTCTC<br>CCTCTGGGAACCACAGTTGTTTCTGTATCTGTAACCTCATT<br>TCTGTCTTGAAATATGTTCCCTTGATACCGTTTTTTTTTTA<br>GATTCACATATAAGCAATATCATATTTGTCCTTCTCGGCCT |
| MSTRG.129912.5 | 0.05 | 0.27 | 0.01814 | 2.296 | up | CGCATGCGCATACAAAGTTGTGCGCTGACCAGGAAATCCTTC<br>CGATCTCGCGGTCCCCTGTGTGAGGAAGGTGAAAGGGTGT<br>GTTGTTTCTTGATACTTTAGGACAGTTACTTTAGAAGTCGC<br>TGTTGTTACCAAAACGCCAGGTTGATAGTTCTTCTTCAT<br>AACCTTTTGTTCACCTGGTGTGAAACAAAAAGGTGGGTCT<br>AGGTGAAGCTTTTACTTAGAAGCGGCCAAGTTGGAGCACTAT<br>GTGCGAGCAGTTGGCAGGCATACTGCTATCAAGAGGTCTGAA<br>CTTTGCAGGTGGCTCAGTGGTAAAGAATCATCCTGCCAGTGT<br>AAGAGATGCAGGTCAATCCCTTGATTGAGAAGATCCCTTGG<br>AGAAGGAAGTGGCAACCTACGCCGTATTCTTGCCTGGGAAA<br>TCCCATGGCCAGGAACCTGGTGGTCTACAGCCCATGGAGTCA<br>CAAAGAGTCCTTATTTAGGACTAAGTACTAAATAACAACAA<br>TACCTAGCGAGTAAAGTGCTAAGAGATCCCTGAAGCTTCTTG<br>AAATTGCTAGAGTAAAATTTCTTGTATGGTTAGGGATGGGA<br>ATGGACAAGTTTGTAAAGGCATAATAAAATTTAATTTCAAAG<br>AATTTATTATCTGTTTATTTTGGCTGTCTCAGGCCTTCTTG<br>CTGTGAGCGGGGGCCGCTGTGTGATGACAGCGCTTGGCCCT<br>CACCGCGGTGGCGTCTCACAGGGAGAGGGCTCTGGGGTGTG<br>AGCGTCCGCGTGTGGCTCTCAGGGTGTGGAACGCAGGCTC<br>AGTAGCTGTGGCCACGACTCAGTTGCTCCAGGGCAAGTGG<br>GATCTCCCTGGATTAGGGATCGAAGTCATGCCCCCTGTGGTG<br>GCAGGCGGATTCTTAACCACTGGACCACCAGGGAAGCCCTG<br>GTCCCGTCATTTAGAACACATATTTGATGTCTGGCCACCG<br>TACTAGTATGGAAGTATAAGTTGAAAAAATGTAGGGCACTTT<br>TTTGCCAGTGTACATAATAAAAAATATCTAGTAATGTTATTT<br>CACTGGACACAGTGGAGATGTTTGAAGTTATTAAGTCCATGT<br>TCTGTCTATGTCAGTATATTTACGCTTGTGAATGGCGTGTG<br>CACTGAAGTACCCTCTCCTCTCACAAGAAGCATCTTCCAGAA<br>ATCACCTCACCCAGATTAGCTGGCCGATGACCACAGTGACA<br>TGTGCTTCTCAGATAACACATGACATTCTATTTGGCTCAGAA<br>CTTAGTGGCTGGCTCTGCTAAAAATAAGTCTTTAATGGTTGA<br>TTAGGACATTCATCACGGGGTGTAAATTCGGGAGTTTCT<br>TCGTGTCATGAAACATATTTATGGACGGCCACAGAGTGGATG<br>CACCTCGTTTCTTGATGAAATGTGATAAGGATTTCCAGAGAC<br>TCTTTCCCGGAAGTTCATTGCAGAGTACGGAGCAGTTCCC<br>CGCGCTCTTTCGGGCCTTGTGGCCATCTGCTCAGCATGCGG<br>TGGTGCCTGTTCCAGTTCCAGCTTACCCTCCCCGCTCTC<br>CCTCTGGGAACCACAGTTGTTTCTGTATCTGTAACCTCATT<br>TCTGTCTTGAAATATGTTCCCTTGATACCGTTTTTTTTTTA<br>GATTCACATATAAGCAATATCATATTTGTCCTTCTCGGCCT |



|                |      |      |         |       |    |                                                                                                                                                                                                                                                                                                                                                                                                                                                                                                                                                                                                                                                                                                                                                                                                                                                                                                                                                                                                                                                                                                                                                                                                                                                |
|----------------|------|------|---------|-------|----|------------------------------------------------------------------------------------------------------------------------------------------------------------------------------------------------------------------------------------------------------------------------------------------------------------------------------------------------------------------------------------------------------------------------------------------------------------------------------------------------------------------------------------------------------------------------------------------------------------------------------------------------------------------------------------------------------------------------------------------------------------------------------------------------------------------------------------------------------------------------------------------------------------------------------------------------------------------------------------------------------------------------------------------------------------------------------------------------------------------------------------------------------------------------------------------------------------------------------------------------|
| MSTRG.199116.1 | 0.03 | 0.17 | 0.04375 | 2.293 | up | <p>GATAAATACATGGGTTGTTAAGAATGCGCTGTTTCTTGAAGT<br/> ATCTTTTACTGATTATATCCTAGCTTTGTATGTGTTCTGCTG<br/> GCTGTATGCTCTAAGCCCTTTGTTCCCTGTTCCATAAAAAAG<br/> GCTTGACTGCAGAAATAAACTTGTTCAGTCCCTGCAGAGACTG<br/> TCCAAGTGTTCTTTCAGGTTACCCGTTTCCAAGTCCCGGAGA<br/> CATATCTCCAAAAAGTGGCGGCCAACAGGGACTTGAAGGAC<br/> GACTGAACAAAGCGGCGAGCCCTGCAGAAAAGAGATGGAGAAG<br/> AAATCTGGGTTCCACTTCGCCATGTCCGTTACCGAGAAGGAC<br/> CCCAAGACCAGATCCCCCGACAGGTGATGCAGCTGACGCGA<br/> AGGGTCTCATCAATGACCATAGAGAAGCCGAAGAGAAAACGT<br/> CAATGTCTGAACCCCTACCATAGGACCTGAGGAATGGCATGT<br/> GTGGAAGATTCTGCTGCACTGGAGCACTTTGCCAATGTGTA<br/> TGAGACTGCGAAAGCCTTAAAAACCTCAAACTATACCTTTT<br/> TATACGATAGTACAGGTTATACCCAATCTGTGTGCAGCTCC<br/> CGTACATGTTTATTGTAGGTAACCTCGATATAAATCTCTTGG<br/> CTAAGATTGTTAACTGTACAGCATGTGCCTGTATACGTGTT<br/> TAAACCATACTATTTTCATATCATTATGTCAACATTGCAATAG<br/> TCAGGCAAAGATCTGATTTGTGGCTTCCTGTTAACCTAACAG<br/> AACCATGGACTGACTGTATTTCTCTCAGTTTTGCTCAAATAT<br/> GGCTTAAGGAGGTCAAGGCGCATAATAGGATGGATTATTGCT<br/> GGCATTCTTAGTCTAATATCTATTGTTACAGTTGGAACCCTA<br/> TCTGGTATGGCACTACACAATTCTATACAGATGTCTCTACTC<br/> AAGACTCCGTGCCTCCTACGACAGAGTCCAACCTAACAGCTGC<br/> CATGCTTAAACTAAAAACAAAAGGAGGATATGTTGGGAGGCA<br/> CAGTGCAAAATAGCCTTGAAGGAGGAGTCCGTGGGAAAATG</p> |
| MSTRG.225378.1 | 0.05 | 0.25 | 0.01685 | 2.283 | up | <p>GAGCCACCAGGAGGAGGGGAGGGAGGGAGGCAATGGGCCCC<br/> CCAGATGTGAGGGGAAGGAAGGAGGGGGAGCCACCTCCCT<br/> CGCCGCTGAACTGAGTAATTGGACGGAGACCCACTTGGCGG<br/> CAGGAAATGGAACAGATCCAGGTGACCCATGAATAATCCCGA<br/> GTCGACTGTAACCTTTCATTCTCGGGTTTCTGATGGGAATA<br/> TAACAAAGTTCTGGACTCTGGAGGACAAGAAAACAAGAAAA<br/> GCCCTTTTATTAATAAAAAAAAAAAAAAAAAAAGACTTCTTTA<br/> TTCACAACCTCACTGCCCATGGAGTAAATTTGATCACTTGTG<br/> TAAAAATTTTCAATTTCTGGCAGGGAAGTTCAAACCTGGCTG<br/> AGGGTTATAGCCCTTCTTTGTGTCCAGGGATTTCCATGTGC<br/> GATTTCTCATGATGTTAATTATCTTTCTATCAAAATTTGAGT<br/> GTGTCACAAAACATTCTCGAAAGCACAGGATTCTTTTCTATC<br/> CAGTGGCTGTAAGAGGAGTCACTCTGACACATGCCTTCTTTT<br/> AGATGATAACTGGCACTCTGTGGACAAAATAACCACGATGAG<br/> GGAAAAGCCACTCCCTCCCAGGCTTGTGCGCTGGGGGAGAG<br/> ATTCTGAGTGATGGAGAGGTAACAACACCACAGCACCCAATG<br/> CAGGGGAGGCCAACGGTCCCTTGGCCGCCGCCACCCTGGCT<br/> TGCAGGGCTGTGGGGCCACCATCGCCATGGACACTCCAGCGC<br/> TCTCAGCGTGGTTCAAAGGCCGTGTGGTGTGAATGGACACC<br/> CATCTCAGGGCCCAGAACTGAGGAAGCCACAGAAACCTGTAG<br/> GAAGAGTAATAGCAGCACTCCTTTGGGCACGGGGCCTTGGGG<br/> TTGATCGTCTCTCGTCTTATAAGAGGGTCTACACGAAGCTG<br/> GTTCTCAATGAAAATTTGTTACAGGAAGAGTACCTGTTTCCT<br/> GCCTTAGGACAGCTCTGTGGCATAGAATTTCTGTTGGGTA<br/> GAAATATTCTTTATCTGTATTGTCCTGGTGGCGACCACCTGT</p>          |

|                |      |      |         |       |    |                                                                                                                                                                                                                                                                                                                                                                                                                                                                                                                                                                                                                                                                                                                                                                                                                                                                                                                                                                                                                                                                                  |
|----------------|------|------|---------|-------|----|----------------------------------------------------------------------------------------------------------------------------------------------------------------------------------------------------------------------------------------------------------------------------------------------------------------------------------------------------------------------------------------------------------------------------------------------------------------------------------------------------------------------------------------------------------------------------------------------------------------------------------------------------------------------------------------------------------------------------------------------------------------------------------------------------------------------------------------------------------------------------------------------------------------------------------------------------------------------------------------------------------------------------------------------------------------------------------|
| MSTRG.205178.3 | 0.04 | 0.23 | 0.02504 | 2.245 | up | <p>TGCCCTTTCGACCTCCAATTCCTAACGTGGGACTTCTCCTGAGCGCTGTAGCGGAAAGGGCTTCATCTTGCATGGCGGGGAGCCACGTGGTTTTTCTCGAGTTACGGCGGATTCTCGAGTTACGACTGGGAATTCAGGCTGCCTCTTGTGTGGCCCAGGCAAGTCCAATCTTCCATTCGAGTTGTGAAGGAAAGCTGGGGATTGCTCTCGAGTGACTGCAGGGCCAATAGACCTCATCTAGGCTTGTGCCAGAAGCCAATGTTCTCTCCAGGGGCGACAGGGATCTCGGGTTGCATTCAGACGCACCCGGGAGACAGGCATTCATCTCGAGTGGAAGCAAAGAAGCCCGCTCTGCTCTCGAGTCGCGACGGGTATCTCTGGGAGCTCACTGGGTGGACTCAAGGGAGTCAAGCCTCTGAGGCGTTTGAGAGAGGTCGCGAGATTGGTCGCTAGGCCATGCAGGAGGCGAAGGCCCTCTCTGGATGACGGGGAATCTCGGGTTGTTCTCGAGCGGCGCCCCAGTGTGGTTCACGAGGTACGACGGCGAGGTCACTGAGCCTCTGTGGGCGCCAGGGAAGTCGGGTCTCCATGCGAGTGGCGAGGGGAGCGCGTCATTGCTCCCAGCCATGGTAGGGGCATCTGGCTCGAGACGTGTTGAAGGAGGTCTCTCGAGGGCTTCCCGGTTGAGGCAGGAAACCCTGGGTTCCCTCGACTTGTGCAGGTGACCTCAGGGGCTTCTCATGGTGGCTCGGAGAAGCCAGGGAAACTGGAGGTGGGAGGGCCCTCTCGGGACTCCACTGGGCTTGG</p>                                                                                                                                                                                                                                   |
| MSTRG.163094.1 | 0.05 | 0.24 | 0.03481 | 2.221 | up | <p>GCTGCTGATAAGGCTCCCTGGAGCCTCAGCGTGGGCTGAAGCATTTTCTGTGCTTTCAGACCAGCAATGTAAGTAACAGATAATGGCAGCATCCTGACCTGCGAGAGGCAAGGGAGCCTCACCTCACATCCTTCTGGGGGAGATCTGGGTAATCTGAGCAGGCAGTCAACTGAGACCAGCCAAAGCGAGTGGTAGCCAAAGGCGCTAGTTCCTCTGGGGTCCCTGTGGTCAGCAGCTGTTGCTTGATCGTCTACTTTGGGGCTTGCCTTTGGGGCACCACCTTTCATATAGGACTCCATTTCATCCCATTGTGCACACCCAGCTGAGAAGGTGGCTCAGTGGTAAAAGAATCTGCCTGCCAATGCAGAAGATGCAGGAGACTTGGGTTTGTATCCCTGGGCTGGAAAGATCCCCTGGAGGAGAAAATGGCAACCCACTCCTGTACTCCTGTTGGTGAATCCCATGGATAGAGGCGCTACAGTCCATGGGGTCTCAAAGACTCAGACATGACTGAGCAACTGAACACACACACATTTCTTACTAAAATAAACATTAAGGTCCTGCTTTTATGGACTCGACTCTTGAGAGATTTCCAAAATGGAACTCACTGAAAATCTGGTCCCTACTTTGTCTAATCGCGGGCTCTCCAGCTGATGACTCTCCACTGCAAAAATGCACGTAGGCACGGAAGCTATTTCCAAAGAACTAAGCTGAAAGTTCAGTTGAACTGACTCTGTACCACCATGTGTTTAAGCATGACTCAACCAACGGATAAAGTTAATGGAGTCAAAAAACGTATAAGACTCTTGCCAAGGGTGCCAGTAAAAGGAGTCCCTTCTGGAAGGACACTCAGAGAAAAGCTTGGGACCTGTCCCAGGGCTGCTGAGTGCTGTGTGTGACCCCGACAGCTCAGTTGAGTGCCTCTCTCCACCAGTGGCAGCAACACAGCGGCTGCCCTAATCACGGTGGCTGCAGCAGAAAAGCCCTAGAGTGGCAGCGTTCTGGAGCAGCAAGGTGAGGTTTGGGCAGAGAC</p> |

|                |      |      |         |       |    |                                                                                                                                                                                                                                                                                                                                                                                                                                                                                                                                                                                                                                                                                                                                                                                                                                                                                                                                                                                                                                                                                                                                                                                                                                  |
|----------------|------|------|---------|-------|----|----------------------------------------------------------------------------------------------------------------------------------------------------------------------------------------------------------------------------------------------------------------------------------------------------------------------------------------------------------------------------------------------------------------------------------------------------------------------------------------------------------------------------------------------------------------------------------------------------------------------------------------------------------------------------------------------------------------------------------------------------------------------------------------------------------------------------------------------------------------------------------------------------------------------------------------------------------------------------------------------------------------------------------------------------------------------------------------------------------------------------------------------------------------------------------------------------------------------------------|
| MSTRG.31739.1  | 0.04 | 0.2  | 0.03132 | 2.184 | up | <p>GCCAGCTGTGGTTCCAGCTGCCCCAGCTGAGCCAGGCTCCCA<br/> GGCAGCCGCTGAGCTGACCACAGCCACTGCCATTCTCAGCT<br/> TCTCCTGTCAATTCTGGGAGTTTCTGCAGTCATGCCAGCCCC<br/> ATCTTCTCCTGTATGAGATGCCAAAGTTCATTTAGGCTGTTG<br/> CCACCAAGCAAAAAATGTACAGTGTCTGCCAGCACCCCTGGA<br/> AGACATTGGGTGCACCTGCCCGAATCCTCTCAGTCAGTGGC<br/> CTGAGGTGGTGAAGTCCCTGTGAGAGAGGGCGACACGTGCC<br/> AGCTGGAGGGCTCCTTGACAGGAATGATGCCTAGATTTTGTG<br/> CGGATTCAACAAACAGCTTAGATAAAAGCCACTGCAGAAATT<br/> AACACAGCACTGTGTGGATGTGTTGCTTCTTAAGGAAGAAA<br/> AAGTGAGAGAAGTAGGAAGTGAAGTCCAGATCTGTTTTAGCC<br/> CCCAGGTCATTTAGTTGTCATAAAAGCTGGAGTTTTTCATGG<br/> GTGTATTTTTTGTGTACTGTGAATGTGTTTATCCTTCCAA<br/> GGCCAACGTTCATAACAGAACCACCTTCTATTCTCGGCTGA<br/> TTCCTATGGGGAGGGATGGCAAGGGGCAGAGCAGCGACATG<br/> ACCTCCATGAGGTCACAGGTCGAGGCTGTGAGGAAGTGAGA<br/> CACAGAGATGCAGCGCCTGACAACCTCCAGGGGGCGTCATC<br/> AGCGGGAGCATCACCCATGGGAGACTAGCAGTGGGCGGTGCG<br/> CATCCCAGAGCAGGACCTGCCCTTCCCTCCGAAGCTTGGCTC<br/> CAGCCTGGGTCGGGGCAGGATGCCAGGCTCGACTGTCTGCCA<br/> GCTCCCTCTCCCTCGCTAGGGGACCCTTCCCTGCCTACAA<br/> TCCCACTGCCACCTGCAGATAAGGGACTTGCCAGGCCACA</p>                                                                                                                                              |
| MSTRG.50900.10 | 0.09 | 0.42 | 0.02955 | 2.167 | up | <p>CCCTCCCAGGCGCCGAGGCCCGGCCCGGGCGCTCCCCTC<br/> CCTTGCCAGCTCCCCCGCCCCGGCCCTGCCCCAGCCCCG<br/> GGAGCCACCGCTTCCCCGGCGGGCGGGCAGGGGGACGTGGGG<br/> ACCGCCCGGCGGGCCGTGCGGCGTAGCGGGATGCGGGTGGG<br/> CGGCGAGTGTGCCAGGGGCGCGGAGTGCCCGCCTGCCTGG<br/> AGACCGAGGCGGGCGTGGAGGGCGGGCAGGCTCCGGGAT<br/> TTAGGTATTTCGCTCCACATCAGAGCCTGCTCCCTCTGAAGT<br/> CTTCTGTATTCTTCTAACAACCTAGAAATTCTTCAACCCGG<br/> AGCTGTGTACTCAACAGGCAGACGGCTCAGCCTGTGTATGTT<br/> GTCTAAGTGTCTGGAATGTACACCTGGTTCCTCTCCACTGGC<br/> ACCCACAATTTAAGAAAGTAAATAGACGCTTTCAAGGAGGAA<br/> CATGGGCACACCAGGATCAGGAGCTACTGTAGACATTTCCGT<br/> CTATTTTGGGGTTCTGTTTATATGAGAACTGTTATTGCTC<br/> AGATGTCTTCCCTGGAAAAGACCCTTCATTAAGAAAGACTC<br/> CAGCACCAGATGTCTGCTATTTAATTTCAACTAATCAGTCCT<br/> AACTCGACTCTGCCACTGACTCTCTCATGGGTGAAAATTAG<br/> TATCTAATTTTTGGTAGCTCACTGAGCAGTTTTTGGCAAAGT<br/> AACCATTCAAGCCATGCTTCCATTTGTCTGCTATTGTCTGG<br/> TGGGATGTTTCTCCAGTCTCACTGATGTGTTTCAATATGTCA<br/> GTGTTACAGTTCAATGGTGGTGAATTGGCGAAGACAGGGAACA<br/> AGAACCAGGAAGAAGAAGAGGGCGTGACAGTGATGGCCCCGC<br/> TCATAGGAGCAGTAGAATAATGCTGCAGTTTACTAGCTGGGG<br/> TTAGTAATGTCTCATTTTTCCCTCTCACTCTGAATCTTTGCC<br/> CTGGATAAGGGGGAGTTGAATTTAGCTTTAAGAAGGGATTAG<br/> TAAGAAGAGAATGTGAATGTTGTTTTGACAGGTGGGGTGGGG</p> |

|                |      |      |         |       |    |                                                                                                                                                                                                                                                                                                                                                                                                                                                                                                                                                                                                                                                                                                                                                                                                                                                                                                                                                                                                                                                                                 |
|----------------|------|------|---------|-------|----|---------------------------------------------------------------------------------------------------------------------------------------------------------------------------------------------------------------------------------------------------------------------------------------------------------------------------------------------------------------------------------------------------------------------------------------------------------------------------------------------------------------------------------------------------------------------------------------------------------------------------------------------------------------------------------------------------------------------------------------------------------------------------------------------------------------------------------------------------------------------------------------------------------------------------------------------------------------------------------------------------------------------------------------------------------------------------------|
| MSTRG.43630.39 | 0.13 | 0.59 | 0.0418  | 2.138 | up | <p>ATCAGTGAGCTCCGGGCAGTACTTTGGTCCCAGGTTTGGAGC<br/> CCAATGCCCGGAACGCGGGAGAGAAGAGGCTGGCTGCCAGCG<br/> GGTGCTTGCAAGGCTGTACTGGGAAGGACCGAGTGAGCTTCC<br/> ACACCGGGGAGCTCCAGCTCTGCGCCCAGGCGGATAGCAC<br/> AGAGCCCCGGCCGAGAGGCTGCTCTGTGGCGGGGAGCCTCC<br/> CCAAGGCCTGCCAGCTTCTAGCGTTCGCGCCCAGGAAAGGAG<br/> CAGGCTGCGGGAGTGTGGGAGCCGTGAGTGGTGCCTGACTGC<br/> TGCCTCAGCTCAGCTCTCGCCTTCCCTTCGGACCTAGGAGCC<br/> AGGCGTCTTGCAGAGGGCTTAGGGGCTGGGGGTGTGCACAC<br/> TGCCAAAGCCTCCCGCTGGGAGAGCTCTTCCGAGGGAAAGG<br/> AAGCGCCCCAGGCTGCATTCCAAGCTGGGGCTTCCCCGCC<br/> AGACTAAGCGCCGACGAGGGAATCAGGGTCCCGGTGCCCC<br/> TGGCTTGGGGAGGCAGCTCCACAGCCAGAGTGTGCTCCGTT<br/> TGTGCCAGAAAGCGCCTGCCAGCCCGGGCCTTCCCTGGAGC<br/> TGTCTCCCGCTAGAGGACAGGTGGATGTGCTGTGCGGGCTT<br/> CCCCTGGGCGTTTGGGCTCCCTAGCACAGCCGAGCGCAGGG<br/> GAACCAGCCCATCATCAGTGAGCTCCGGGCAGTACTTTGGT<br/> CCCAGGTTTGGAGCCAATGCCCGAACGCGGGAGAGAAGAG<br/> GCTGGCTGCCGGCGGGTGTGTTGCAAGCCTGTACTGGGAAGGA<br/> CCGAGTGAGCTTCCACACGGCGGAGCTCCAGCTCTGCGCCC<br/> AGGCGCGATAGCACAGAGCCCCGGCCGAGAGGCTGCTCTGTG<br/> CTGGGCGAGCCTCCCAAGCCCTGCCAGCTTCTAGCGTTCA</p> |
| MSTRG.25405.1  | 0.08 | 0.35 | 0.042   | 2.097 | up | <p>GAAATCTTTTGTAGCTTTGGCTAAGTGGAAGTATTGCTT<br/> CACGGTGACTTGTGTGATCCTACCTGACTGTTCTAAACCCTT<br/> TTGATATCTATGCACTGCTGCTGCTGCTGCTGCTGCTGCTGC<br/> TGCTGCGAAGTCGTTTCAGTCGTGTCCGAGTCTGTGTGACCC<br/> CATGGACGGCAGCCACCAGGCCCGCAGTCCCTGGGGTTCT<br/> CTAGGCAAGAACACTGGAGTGGGTTGCCATGTCTCCTCCAA<br/> TGCATGAAAGTAAAATGTGAAAGTGAAGTCGCTCAGTCGTGC<br/> CCGACTCTGAGCGACCCCATGGACTGCAGCCTACCAGGCTCT<br/> TCCGTCCATGAGATTTCCAGGCAAGAGTACTGGAGTGGGGT<br/> GCCATTTCTTCTCCCATATCTATTACAAGCCTGCCTAAAT<br/> CATTGACTTCTAGCCACCTTTGGGATGCCAATGACCACCCAG<br/> CCTTACCAGGCCACAGAGGAGAGAAAACATTTACCACAGGAG<br/> GTCCGGTAAGGAACAAGGAATAACAAGTCCCAGCAACCA<br/> GGATTCTGCAGAGGTCAACAAGAGGTCAGCAAGAGATGGGAG</p>                                                                                                                                                                                                                                                                                                                                                                                           |
| MSTRG.91649.1  | 0.05 | 0.23 | 0.04533 | 2.095 | up | <p>TTTTGACTTAATCAGCTCTTTCAAGCCTTATTTCCAATTAAG<br/> TTGGAACACAATATAGTTGTGTTTTGAGGTATGGGAAGTAA<br/> GCCTTCAACATATAAAATTTGGGTAGGAGGACAAAAGTCAGCA<br/> CGTAACACATGGTAACACTATATATGTGAAGTGCTTGTATAT<br/> CTCCCTACAGATCCAATGGGAAAAAAAAATAAAAAATAATC<br/> TTTTCCAGATTACAAAGTAGGAAAAACCACTAGACCATTTAG<br/> GTATGACCTAAATCAAATCCCTTACAATGAAACAATGGAGGT<br/> GACAAGTAGATTCAAGCAATTAGATCCAATAGCAGAATGCCT<br/> GAAGAACTATGGACAGAGGTTTATGTACAGGAGGCAGTGATC<br/> AAGACCATCCCCAAGAAAAAAAAAAGGCAAAATGGTTGTCTGT<br/> TCAGTTCAGTTCAGTCACTCAGTCATGTCCAATCTTTGCAA<br/> CCCATGGACTGTAGCATTCCAGGACTCCCTGTCCATACCA<br/> ACTCCTGGAGTTTACTCAAATCATGTGCATTGAGACAGTGA<br/> TGCCATCCAACCATCTCATCCACTGTTGTCCCCTTCTCCTCC<br/> CTTTTCAATCTCCCAGCATCAGGGACTTTTCCAGTGAGT<br/> CAGATCTTTCATCAGGTGGCCAAAGTATTGGAGTTTCAGCT</p>                                                                                                                                                                                                                                                                                       |

|                |      |      |         |       |    |                                                                                                                                                                                                                                                                                                                                                                                                                                                                                                                                                                                                                                                                                                                                                                                                                                                                                                                                                                                                                                                                                                                                                                                 |
|----------------|------|------|---------|-------|----|---------------------------------------------------------------------------------------------------------------------------------------------------------------------------------------------------------------------------------------------------------------------------------------------------------------------------------------------------------------------------------------------------------------------------------------------------------------------------------------------------------------------------------------------------------------------------------------------------------------------------------------------------------------------------------------------------------------------------------------------------------------------------------------------------------------------------------------------------------------------------------------------------------------------------------------------------------------------------------------------------------------------------------------------------------------------------------------------------------------------------------------------------------------------------------|
| MSTRG.167273.1 | 0.06 | 0.28 | 0.04869 | 2.094 | up | TTATTTATTTCTACTTATTTGGTTGCAGTGGGCCTTAGTTGT<br>GGCCTATGAGATCTTCAGTTGCGCGTATCAGATCCAGCTCCC<br>TGACCAGGGATTGAACCCAGGTCTCCTTACTGGAGCACAGA<br>GTTCTAGCCACTGGACCACCCAGGAAGTCCCCATGAAAAGT<br>ATTTAAGCTAAAATTATTAATTTAGAAAATTCAAATCAAA<br>GACTTTTATTTCCAAGCAGAGACTTCTCTTAATCCACCATT<br>CACTTTTCTAGCAATTTATTATTTTCAGATAATGCAGAAAA<br>GGAAAAAAAAAAGACCACTTACTTTATCTACTCATGAATGA<br>ATCCCTAATTTTCATCATAGCCATTCAAAAAGTTAAAAAAT<br>TAAAAGTGAACAACTAAGGATATACTATACATCGCAGGG                                                                                                                                                                                                                                                                                                                                                                                                                                                                                                                                                                                                                                                                                                                   |
| MSTRG.46945.1  | 0.05 | 0.22 | 0.04988 | 2.083 | up | GGCGGTGTGGGAAGGACAGAGCAAGGCGGAGATGGAGGGCA<br>GCAGGGGCCAGAGCGTGCAGAGCCTCGCAGGCCTCAGGGAGG<br>ACTCGGGGCTTGATCGCAATGGTAACAGGAAGATTTGCTAAG<br>TCGCTTTAGTCGTGTCCGACCCTGTGCGACCCCATAGACGGC<br>AGCCAACCAGGCTCCCCCGTCCCTGGGATTCTCCAGGCAAGA<br>ACACTGGAGTGGGTGCCATTTCTTCCAGTGCATGAAAG<br>TGAAAAGTGAAAGGGAAGTCACTCAGTCGTGCCGACTCTTA<br>GCGACCCCATGGACTGCAGCCCACCAGGCTGCTCCATCCATG<br>GGATTTTCCAGGCAAGGGTACTGGAGTGGGGTGCCATTGCCT<br>TGCTTTGAGCTGGATTCAAATGGACTAAGACATAAGATTAC<br>AACCTCCAGAGAGTATTACTTTGCTACACAGAAGAAACCAGC<br>ACAACATTGTAAAGCAAACCGTACTCCAATAACGATTAATAA<br>TAATAATAACCCCTCCAATAGCTAGCAGTTAAACCACTGGG<br>TATTCATTCCTTCCCCCAGTAGTTGAGCGCCTACTCTGTTCC<br>AGACTCTTCCAGGCACTGGAGAGAAACAAAGGGGGTTGGA<br>TACAACAACTCAGACTCTGCCTTCCCTGGGGCCAGAGGGGTC<br>ACAGACCCTACAGCAAATAATCATAACGGTCAAACACAGTGAT<br>CAGAGCCACCAGGGAGGGCTTCTCCGAGGTGATGCAAAGGCA<br>GCTGGTTAGGTGCTTCATTTGGCCGGTGTACATGGAGCAGCA<br>AGTGTGTGAGAGACTGTGCTGGGTGCAAGGGGTGTGCGACGA<br>GCCAGGCAGACCCAGTTCGTGCCCTCGAGGCGTGGACAGCCA<br>GTGGAGGAGACACACCAGAAATCCCGTGGACAGAGGAGCCTG<br>GCGGGCTGCAGCCCAGGGAGCCGCACAGAGTTGGACATGACT<br>GAGTGACTCACACTTTCACATTCATCTCTGGAGGGGCGTCAC<br>TCTGCTTGCCACAAACCTGGAATCCAGGCCAACCAGCCTC |

|                |      |      |         |       |    |                                                                                                                                                                                                                                                                                                                                                                                                                                                                                                                                                                                                                                                                                                                                                                                                                                                                                                                                                                                                                                                                                                                                                                                                                                     |
|----------------|------|------|---------|-------|----|-------------------------------------------------------------------------------------------------------------------------------------------------------------------------------------------------------------------------------------------------------------------------------------------------------------------------------------------------------------------------------------------------------------------------------------------------------------------------------------------------------------------------------------------------------------------------------------------------------------------------------------------------------------------------------------------------------------------------------------------------------------------------------------------------------------------------------------------------------------------------------------------------------------------------------------------------------------------------------------------------------------------------------------------------------------------------------------------------------------------------------------------------------------------------------------------------------------------------------------|
| MSTRG.169420.1 | 0.05 | 0.22 | 0.03115 | 2.077 | up | <p>CAGCGCTGAGAGCGGCCGGTTGGAGCCCTGCTTACCTTAACT<br/> TCTGACGAGCTCGGGCTCGGGCGCAGGCTCGGGCTCCGGCCC<br/> CCGGCCCGGCTCGGGCGCCCGGCCGGTCCCTCGGCGCGGG<br/> ATGGGCACCGACCCTCAGCATCGGCCGAGACGGCGGGCGGGA<br/> GGGAGACCCTGAGGCCCGACGTCGCGGTGCAGAGCTTGGCC<br/> GCCTCGCTGCTCCGGCACGGCTAGCCCAGGGCGGACTGGGGC<br/> GGCTCGGACCCCCCTCCCACCCACCCACCCACCCTCCCCT<br/> CCCCACACCCCCCGCCCTGCCCTTCCCGAGGGCAGCAGCC<br/> GCGGCCCGGAGATAAGCGCTAGCGCGGCGCGGGGCTCTGCCT<br/> GGGCTAGTGGCACCGACTTGGGAAAAGAAAACGACGAGACAC<br/> AGAAAACCCGTGCTTTTCCCACAGGAAGATCAGTGGATCAGT<br/> CCGGCTAAAGAAACCGAGAAGCCAGCTGCCAACGATGGTCT<br/> ACACATTTGAAATACAGCAACTTCCCTCTTGCCAAGGAAAGG<br/> CAAGACGATAGGAGAAACTACAAGGCGTCGAGGCACGTTTTT<br/> TGCGCGCAGACCTGAGGCTGACCACAACGGCTGAACTCCCAG<br/> GCTCCGAGGCGCCGTGAACAGTCCACAAGGAGAGCGGCCCA<br/> CGCGGCTACCGCCGCGCCCGTGGCCTCTACTAGTAGGCTTTG<br/> GCCCTGCTGTTCCGTGGAGCGGTTCCGGTTCGTCTGAGGCATG<br/> CCGAAGAAACACACACGCCCTTCTGAGCCCCCCTCGCCC<br/> CCGCCCCGACGAACACACATCTTTGGTTTCTGCAACCGCCC<br/> CTCCTGCACGAAGCCGGTCTGGGGTAGAGCTTTGTCGCCGAA<br/> GCCCTCGCTGGCAGGGCGCGCAGCTGAGGGGAACTCCTCAGA<br/> AGTTATATATTGACCAGCACCTTTTCAATACTGACCAGCTA<br/> GCTGCAAGGGGTGGCAGCTGCCAGGGAAAGTAAACTTCTTCA<br/> CCGGTGCAGGGGCCGCGCGGTGAAGAGTTGGGACGCAGCGC</p> |
| MSTRG.140737.2 | 0.04 | 0.2  | 0.03455 | 2.057 | up | <p>TAGTTTTCTTCCAGTTAAACTGATTTCCCTCATCTATTTATT<br/> TCTGGACTGAAGCCAGAATCAACATTGTCCGTTTTTCTAATC<br/> AAATAGTGGAGAAGCAATTACAAAGTCTGAGTGCAGATAGAG<br/> GAGCCTGGAAGGCAGAGCAACTGGACCTCGCCTAAGCTGTGT<br/> CTCTGACTCATTCTGACTTTAGTTCTTCCAATGGGAAAAAT<br/> GGCGAAGATGTTTAGTTTCATCCTTGTCAACTGCTCTGGT<br/> AATGGGCAGGGGAAGCTCGGTAAGCTTATTACAAAACTATT<br/> ATATTTTTAATTCCTGCTTTGATCTTAATTTTCTCTTGCAAA<br/> AAAACTGTAGTAAGTGTCACTGAAAAAACTAAGGAGGAAAA<br/> CTAAAAAGATTTGTGGAAGTACCTGCCACATAATAGGCATT<br/> ATTAAGTGCTTTAAAAATTTTTTAGAGTAAAAAATCAGTATT<br/> TACTGTCTTTTGGATTTACTGAGGTTATTTGGGTGGTTAC<br/> ATGGTATTAAGAATTTAAAAGCTCTTTCAGATTTACCTTGAG<br/> CTTGTAATATTGGACACTGTCCATGTAAACTAAACAGATTA<br/> TTTGAAGTAATTGCAATGCACTTGTGCCTCCCTCCATGAAT<br/> AAAAGTGTGAAAACACTCATTACTCAAAGTTGTAGGAGAAA<br/> GAAAATCCCTAATTTTTTAAAGATCTTTTTTTCTTTGATG<br/> TGGACATTTTTAAAGTCTTTATTGAATTTGTTACAATATCA<br/> CTTCTGTTTTATGTTTTGGCTTTTTTGACCACCAGGCACGTA<br/> GGATCTTAGCTTCCCGACCAGGGATCAAACCTGCAACCCCTG<br/> GTTTAGAAGGTGAGATCCAGCCACTGTACTCCAGGGAAGCT<br/> CCCCACTAAGTTTTAAATAAGTTTACTAACACGGTATATAT<br/> AGTCACATAAAAAATTGAACATTCTTGCCCTGTAATCCTGTAG<br/> TACTTTAAATTGTATAGTTCAGTATTAAACAGTATCACA<br/> ACCAATCTTCCACTGTAGAAAGCAAGGCAGAATTCCAGATG</p>      |

|                |      |      |         |       |    |                                                                                                                                                                                                                                                                                                                                                                                                                                                                                                                                                                                                                                                                                                                                                                                                                                                                                                                                                                                                                                                                                                                                                                                                                                     |
|----------------|------|------|---------|-------|----|-------------------------------------------------------------------------------------------------------------------------------------------------------------------------------------------------------------------------------------------------------------------------------------------------------------------------------------------------------------------------------------------------------------------------------------------------------------------------------------------------------------------------------------------------------------------------------------------------------------------------------------------------------------------------------------------------------------------------------------------------------------------------------------------------------------------------------------------------------------------------------------------------------------------------------------------------------------------------------------------------------------------------------------------------------------------------------------------------------------------------------------------------------------------------------------------------------------------------------------|
| MSTRG.81595.3  | 0.08 | 0.31 | 0.04347 | 2.051 | up | <p>CCCTGTCGGTTGAGTAGAGCAGTCAAAATTTGGCAATCGTTT<br/> TGGAAGGAGCTTGGCCGGCCATGGTCCATGGGGTCGCAAAA<br/> GAGTCGGACACGACTGAGCGACTTAAACATCAACAAACA<br/> TCGGTAGGATAAGAGGAAGCACTTCCAGAATAACACGGGGAG<br/> TGGGGTGGTAGCTGGCTAGACAGGTGAGCCAGGAAGGCC<br/> CCAGCACTTTTGTCTCCCCGGGAAGTAGGAGCTAAAACA<br/> TCCGCCCGGTGGACGTCGGGGACCCAGGGGGCAGGACCCTC<br/> CCAACTCCTGATGCCCTGGCCAGCGGGGGACTCTTTCTGC<br/> ACCATGTAGCATACTGGACTACAGCCCTGCCCGACCCAGGGG<br/> CGGGCCAGGGCAGCCACTCCCAGCCAGCCCTGGCGTAGCCC<br/> CGGGGAGCACTGATGGAGACGTGGACTCCTGGGCCCTGGCT<br/> GAGGGGCCAGGGGAGAGAGGGCTGACGGACTTGGCGTCTGAA<br/> GGCGGCGGGGACCAAGGGGGCAGGGCCTGAGCTGCCTCCCTC<br/> TGCTGCCACCACCATCTCAGGAAAGGCTGCTGGTGGCTGGCT<br/> GCCATTCCAGCTGCAGCGGTGACACTGGGGAGCGGGGTCT<br/> CTCCCCCGGGCCTCCTTCACTTTGGGCCTGGCCTCAGGCC<br/> CTGGTGCTTCCCCCTCCTCCTGGGGAGGGGGCCCATGAAG<br/> AGCAAATGAGCCAAACGTGACCACTAGCCTCCTGGAGCCAGA<br/> GAGTGGGGTGCCTCCTGACGGGTGCCCGGCCAGCGCCAG<br/> CCATCTTCCCTGAGCCAGCCGGTAGGTGGTGGGCATGCCTGC<br/> CTCACCTTCATCTGGGGGTGGGTGGCCAGGAGGGGCCAGAC<br/> TGTGAATCCTGTGCTCTGCCCGTGACCACCCCGCTCCCC<br/> CCATCAATCCCATTGCATAGGTTTAGAGAGACACGCGTGAC<br/> CACTGGCATTCAATTTGGGGGTGGGATATTTGGCGGAAGCC<br/> ACCCAGCCTTAGTCCCAGGGCGAAGCGCTGGGGGAAGACG</p>                   |
| MSTRG.221949.8 | 0.04 | 0.16 | 0.03974 | 1.964 | up | <p>CGGAACTTGGGAGCAGATCATAGCTGCTAGGTAAGTACGCGT<br/> TGTTGGCGGTCGTGCGCGGAACCTGAGTGGCGCAGCTGGG<br/> TTGGGAATGCGATACGGTAAAAAGAGTTCAGAAGTTGAGGG<br/> TTAGAGTGCGGCTTGAGTATTTACACATGAAAAACGCGCCA<br/> CCGGACCGCCACGTGTCCCCTGTGCGGTGGCGACCGGCTTC<br/> GAGTTCAGGCGTGGTAGGCTGCTGCTGGTCATGGCGCTGCG<br/> CGCGGCCGATTGCTAAGCCGGCTGGATAATCCTGAACGGCG<br/> CACGGGAAACGACCACATTCCTGAGATTTGGGGCGGGAGTTA<br/> CGCTTAACGTTGACTTACAGGCCTTAGATACGTAGTCATATC<br/> AACAGTTAATTTAAAAATCGGCAGCTCCTGACTGCGTGAAC<br/> TGAGTTGTATTGTGCCAGGTGGCGCTGTGTGCAAAATCGAAT<br/> TGTTGGAGGGGAAGGTTTTAGTGCTGAAAACCTTAAGCTATG<br/> ACCTTCTATGACAATACTTAATTTTTAAATATATTTATTCTT<br/> CCGCAGGTTAAGAAATGATTCTCCCGCAGAAACAATGGATT<br/> TCGGTGTAGCGGAACGTACGTGGAGATGCTAAGGTAATTG<br/> TTGAGAGCTTAGTTTTAAGTTGAAGGAATAAACCTGTTGATT<br/> TACAGGTTGATCAACCTGTAAAGATGATGCATCATTTGAAAA<br/> TTTTTTTTTTTTTAAGATGCAAAGGTACATTTCAAACACG<br/> CCGACAATATTGGCTGGAAAATGACTTGGTAAAACCTGAT<br/> GATCTTACCAGCATTCTGCAGGTTGATGAATACTAATGAAGC<br/> TGTGGATGTCACTGAGCAGCTTCATTTAAAGTAAGTTACCC<br/> TGACTTACATCTGCTGCAGTAATTCTGTCTGGTTTGTGGTAA<br/> ATGTCCGTGTAATGTAGCATAATGGATTTTGGTCTGATCAAT<br/> GATGAACCCTATCCCGAAGCTGATAACCTGAAGAAAAGCATG<br/> TACGGATTGCGCTTCTGAGACAAGACTAATGTTTACAGATATGA</p> |

|               |      |      |         |       |    |                                                                                                                                                                                                                                                                                                                                                                                                                                                                                                                                                                                                                                                                                                                                                                                                                                                                                                                                                                                                                                                                                                                                                                                                                                   |
|---------------|------|------|---------|-------|----|-----------------------------------------------------------------------------------------------------------------------------------------------------------------------------------------------------------------------------------------------------------------------------------------------------------------------------------------------------------------------------------------------------------------------------------------------------------------------------------------------------------------------------------------------------------------------------------------------------------------------------------------------------------------------------------------------------------------------------------------------------------------------------------------------------------------------------------------------------------------------------------------------------------------------------------------------------------------------------------------------------------------------------------------------------------------------------------------------------------------------------------------------------------------------------------------------------------------------------------|
| MSTRG.46782.1 | 0.05 | 0.23 | 0.04481 | 1.959 | up | <p>CTTTCACAATTAATGTATGGGCATTTAAACGAGCTGCAGCCA<br/> GCCACGAAACTCCATCAAGAATCCATGCAGGACAACCGGCTT<br/> GACCGCGTGGCCATGCTTACCTCCTCAGGCCAGGGGTAGA<br/> TGGCACAACACTGATCACGTTGACTTGTGAGCCACAGTCAGAAG<br/> ATACGTGGTTTGGACAGAATGAAGAAGTGCCTCAGGCCTCGC<br/> AAAGCCCAGAGAGCTGGAGCCTTCCCTCCATCTATTACCAAGA<br/> CTGTTGTTTTTTTGTTTTTTTTCCCCAAACTTTTATGTCGT<br/> CTTCAAGAGAGTGGGCTCTCTCTCTCTCTCTCTCTGGGAA<br/> ATGATTGAGTCACAAACAGTGTGAGATGCTGCCAGGGAGCTC<br/> TTTCCCCCACCCACCCACCCATCTTCCCTCAGTGCTCAG<br/> GGATGAGATCATTTCATTTCGGAGCCAATTATAGAAGGAGAAC<br/> GCTGGGGATGTACAAAGAAACCTCCTCCCACTAACACAGGCT<br/> GTACCCTGCCGGCATGAGCAGGAACAGGAGGCTGGATGTCCG<br/> GTTCCAAGTTC AACCTCAGGGTGC GCGAAGGCCAAGCATTCC<br/> TAAGCCGCAGCTTGATCTGTCAAGCTAGGATGCTGGGCTTC<br/> TGGCTAAATGAGATCTTTTGGTCAGAAGTTCAGAGCTGGCAA<br/> TACTAAACTGGGAGGAAGAAGATCCAGAGATGCTGGTGTCCA<br/> TGTCTGCCACCACGAGGTGCCTGCCTAAGGAAAGAGCCGAAC<br/> GGAGGAGCAGAGGACCAAGGGTAGCGATCAGACAGCTCTAA<br/> CCCCACAAGCCCTGGATCTAGCCTCACCTGAAGGGAGATCTG<br/> TCCTCAATATTTTAAATTACATGTGTGATAAAATTTCCATTTT</p>                                                                                                                                                                                    |
| MSTRG.68246.1 | 0.06 | 0.25 | 0.04715 | 1.934 | up | <p>TGCCATGCATTGGTGCATATGTGTACGTAGTCTTCCTACATG<br/> AAGGGACGTGCTTGTGCGATGACCATCTATCCATATGTAGAA<br/> GCTTTGTTTTCTCCATTAGTAATTAACATTTGATTGCATCA<br/> GTTGGGATTATGCAACTCTCTGACAGCTGACACTAGTTCCATA<br/> CCTGTTTCCATTCTTTCTCCCCTCTGATTACAGCATCTTGGCT<br/> CCCGAGAGGTGGTGTATTATAATACTTTAGAACCCACTTGG<br/> CTGTGTTTCTGACTACTGGGCGTCTGTCATGGTTCTCCAT<br/> CAGCGGGACCAGTAATTGCTTGTTTTTTCATTCATGTTTTGCC<br/> TCCTTATGATGAATAGCCTTAACTTTAAGCATTCCAAAACCA<br/> TTGATTTGTTGGCAAAGTGTTTTTGTTTTTAATTTCTTTGGG<br/> GACTTGGCGATAGTCTGGCTTTTCTTGGGCTTCTGCAATAT<br/> TCAGTGAATAACAGTGACAAGGGCAGCGAGAGAGAACAGCC<br/> GCAGGGCGGACCACACGCCAGGCGTGGGCAGCCCCAAAGG<br/> GCACTAAACGCCATCATTCTCCAACGGCTCTCTGAGGGCT<br/> GGGACTCTTATCACCCCATGTTACACATGGAGAAAGTGAG<br/> GTGGCTTTGAAGTAGCTTGTGCATGGAAACGAGTCCACATCG<br/> GGGCGAGGCTCACTGACGGGGCTGGAGAGACTCGGGACAAGG<br/> CGACGCGCCAGGGAAGCCAGCGCTGGATGGCGCAGACCCGG<br/> AGGGAGAGAGTGGGCAGAGGTGCTTGGCTGCTGCCTCTGCAG<br/> AGGAAGTGACACAGATGAGTCCTCCCATCCGAAAGCCCTGGA<br/> CAGGGAAGTCAAGGCAGGAAGGAAGCGGAGGAAAGGGAGGTG<br/> TGAAACTGGGCTGAGGGAGTTCACTTGTGCAGCCTCTCAC<br/> GAAGAGCCCCTGCTTTCATCAGCTTTGTCCCTTCAGGGTGT<br/> TCATCCAAGGGCAGGGGGTGAAGCAAGTGAAGGTATGTT<br/> TACCTTCAGCCAGTTTTCTTTTTTTTTTTTTTAATTTTCACA</p> |



|                |      |      |         |       |      |                                                                                                                                                                                                                                                                                                                                                                                                                                                                                                                                                                                                                                                                                                                                                                                                                                                                                                                                                                                                                                                                                                                                                                                                                                              |
|----------------|------|------|---------|-------|------|----------------------------------------------------------------------------------------------------------------------------------------------------------------------------------------------------------------------------------------------------------------------------------------------------------------------------------------------------------------------------------------------------------------------------------------------------------------------------------------------------------------------------------------------------------------------------------------------------------------------------------------------------------------------------------------------------------------------------------------------------------------------------------------------------------------------------------------------------------------------------------------------------------------------------------------------------------------------------------------------------------------------------------------------------------------------------------------------------------------------------------------------------------------------------------------------------------------------------------------------|
| MSTRG.91984.1  | 0.03 | 0.14 | 0.04408 | 1.906 | up   | <p>CTCTCACATCCATACATGACTGTTGGAAAAACCATAGCTTTG<br/> ACTAGGCGGACCTTTGTTGGCAAAGTAATGCTTTGCTTTTT<br/> AATATGCTGTCTAGGTTGGTCATAACTTTTCTTCCAAGGAAC<br/> AAGCATCTTTTACTTTCATGCCTGCAGTCACCTTCTGCAATG<br/> ATTTTGGAGCCGCCCCCCCCCGCCCCAAATAAAGTCTATT<br/> TCCACTGTCTCCCCATCATTTGCCATGAATTGATGGGACCAG<br/> ATGCCATGATCTTAGTGTTTTGAATGTTGCACCATTTCTTGG<br/> TACCAAAAGTAAGCAAAAATAATACAAGATAACTGCAGACCA<br/> AACTTTCTCTTAAAGAAGGTTATAAATATTTTAAAGAAACAT<br/> TTGTTGTTTAAATAAACTAGTAAATAAAAAGGATAGTACATCA<br/> TAACCGGTGACTAAATGGAGTTTATCTTGGGAATGTGGGGTA<br/> GATTTAAAAATTATTTAATTTGCTAGAATTTAATAATAATAT<br/> TTGGGCAACTTCTTGTGTAATTGTAATTATTAATATAATAA<br/> TTTATTAGAAAAAGGGAGGAAATTATGATAATTATTTTAGAT<br/> GTAGAAAAAAGTTGGACAAAGTTAATATTATGTGTGATAA<br/> TGGCTCTAAACAAATTAATAATGAAGTCCCTGTGCTGAAAAG<br/> GACATCTGTAAACAAGTCACAATTAAGCCATCAATACAGATG<br/> AAAGTCTGACTGTTTCCCTTCTAAGTTTGAATAAAGACAAGA<br/> ATGTCCACTGACTTTGATTCAAGTGTGTACTACTTGGTAACA<br/> TAAATTATAACAATAGATAACAAGGAACAGGAGGCTTACATC<br/> TCAAAATACTATGCTGAGAAAAGCATCTAGACAAAGAAGTAT<br/> ATCTGTAGTGACAGAAAAGCAGATCGGGTTTTGCCTGAGGCTA<br/> GGGATAGAAGTACTAGGGACAGAAACAAAGGACCTTTTTAG<br/> AGTTATGGAAGTGTTTGTATTTTGTATGTAGTCACCATCAAG<br/> TTGATATATACATTTGTCAAATTCATAAACACGTATGCTTAC</p> |
| MSTRG.133381.7 | 1.06 | 0.3  | 0.04493 | -1.87 | down | <p>GGGCCAGCGGGACCCTCCCCAACTTGAAGCGGGGAGGCGC<br/> GGGCCGCGGTAGGCAACGAGCGGCACACGGCCCCACCGCGGG<br/> GCCGGCGCACCCGCCCCACCAGCCCCAGAGGGGAGGTGGG<br/> GGGCGGGGTGTTCTGCCACGCGCTCTTGGCAGCCGCCACGG<br/> CGGCCACTGCGCACGCAGGAGGGGCAGCAGCTGGGGGTCCG<br/> ATACCCCAAGGCTCCCTCTCGGATCGCTAGAGAAGGCTTTCT<br/> CACCGAGGGCTCGCCGCCCTCCCGCCACTCCCCCTCCCC<br/> CTGGCTCCCTCGCTCGCGGGTCTTCCGGCGCGCGTGCCCGG<br/> TCCGTGGCCTCTCCGCCCGCCCCGCTTCCCGGCACGCCCG<br/> GCTCCTCGTGCTCGCGCCCTACCTGGTTGATCCTGCCAGTA<br/> GCATATGCTTGTCTCAAAGATTAAGCCATGCATGTCTAAGTA<br/> CGCACGGCCGGTACAGTGAAACTGCGAATGGCTCATTAAATC<br/> AGTTATGGTTCCTTTGGTCACTCGTATGCTTGTCTCAAAGAT<br/> TAAGCCATGCATGTCTAAGTACGCACGGCCGGTACAGTAAA<br/> CTGCGAATGGCTCATTAAATCAGTTATGGTTCTTTGGTCCG<br/> TCGCTCCTCTCCTACTTGGATAACTGTGGTAATTCTAGAGCT<br/> AATACATGCCGACGGGCGCTGACCCCTTCCGGGGGGGATG<br/> CGTGCATTTATCAGATCAAAACCAACCCGGTCAGCCTCCTCC<br/> CGGCCCGGCCGGGGGGCGGGCGCCGGCGGCTTTGGTACTC<br/> TAGATAACCTCGGGCCGATCGCACGCCCCCGTGGCGGCGAC<br/> GACCCATTGCAACGTCTGCCCTATCAACTTTCGATGGTAGTC<br/> GCTGTGCCTACCATGGTGACCACGGGTGACGGGAATCAGGG<br/> TTCGATTCCGGAGAGGGAGCCTGAGAAAACGGCTACCACATCC<br/> AAGGAAGGCAGCAGGCGCGAAATTACCCACTCCCGACCCGG<br/> GGAGGTAGTGACGAAAAATAACAATACAGGACTCTTTCGAGG</p>                 |

|                |      |      |         |       |      |                                                                                                                                                                                                                                                                                                                                                                                                                                                                                                                                                                                                                                                                                                                                                                                                                                                                                                                                                                                                                                                                                                                                                            |
|----------------|------|------|---------|-------|------|------------------------------------------------------------------------------------------------------------------------------------------------------------------------------------------------------------------------------------------------------------------------------------------------------------------------------------------------------------------------------------------------------------------------------------------------------------------------------------------------------------------------------------------------------------------------------------------------------------------------------------------------------------------------------------------------------------------------------------------------------------------------------------------------------------------------------------------------------------------------------------------------------------------------------------------------------------------------------------------------------------------------------------------------------------------------------------------------------------------------------------------------------------|
| MSTRG.199472.1 | 0.38 | 0.09 | 0.04847 | -1.89 | down | GGGAAAGACAGCAGCAGGTGTGGAAAGCAGACCTCATCCTCC<br>AGGAGCCAACAGAGCAGAAAGGAGCGGCCGGCTGAAGTGCAC<br>CGCAGCAGGGGTGAGGGGAGGGCTCCCCACGGCTATGCCT<br>CCAGCCACAGAGTCAGGGAGATGTGAACACCTGGATGGGCTG<br>ACTTCTGTCTGGGAAATCTCCCTGGCTGCCTTACCAGTCAC<br>AAGTCTGCAGCCCAGATTTCTCTCACTCTGTTGTACGACCC<br>TCACCTGAGCTTCTTCTGTGCTTTGTCTGAATCCAAACACT<br>AACTGGATGCTGTTGGGACTGACCATGGGAGCTGATGGAGAA<br>GAGAGACATTAGCTAGGCCAGTATGATTTCCCTTCTCTCAGG<br>AATATAAACACAAAATCTGGAGAGAGGCTGCCACTGGTCGG<br>GGAAGGCGAGAGAACATGCATGAACAGGAGCTGGTGAACCAC<br>GCAGGCTGAAGATGACTTCTGACTCCGCTGCTGGAAGCCTTT<br>GAGCCACTGGGGACACAGGAACGCCTCCCAGACCCAGTCGCC<br>CAGAGCAATATCCCACTGGAGTTTGGGTCTGAGGTTTCTG<br>ACAATTACACAAGGATCCAGAAAATAAAACCCCTTGTTTGA<br>GCTGATGTTGCTATGTATCTACCTCTACAATGGCAACAAA<br>GATACATCCAGGATAGTATAGATATAATACAAAACAAATATG                                                                                                                                                                                                                                                                                                                                                            |
| MSTRG.198307.9 | 0.43 | 0.11 | 0.0497  | -1.98 | down | CTGAAGAGTTCATGCAAAATAATTTGGAGTGCTGGAGGTAAT<br>TGGAGAGACCCCTAATATCATTAAAGGTCTGAAAGATGCCAG<br>GTAGGCAACTATTTTGCTTTTCAAATTTTCTTGTGGTCATT<br>TTAAATGATTTTGAGAGACTAACTACAAATGCTGCTGATGT<br>AATAAACTGTTCTGCCATTGTTAATACAGGACTTGAGATT<br>GTTCAATTCTGAAAAGCTATCCAATATGCCCTGTAATATT<br>AGCAACAGATTTGGCCAGTGCATTTATTTCTACATCTGTACA<br>TAAAAAATCACCCTAGCAATTTGCATCTACCTGCGCAGGA<br>CAGTAATATATTTTCACTGTCTTGTCTCAAGGGTGTGTAAT<br>TTTCTTGCTCTCTGTCACTGTTGAAAGAAGGGATTTTAAA<br>TCACATGAAAAGCTTTTCTTTACCTATTACAGAG<br>ATGATGTATTAATTAGGGGAAATAGGAGAGCTGTTTTCTGTA<br>TTTTCTCCTCCTTATTGAGTTTATGACCTTCAGGGGATGGC<br>TGAGTAAATACAAGAAGGCTCATGAGCCCGTAGTCCCCTCTG<br>TGGGTATTCTACTCTTCAAGCCTAGAGAGAAGCACCCATTT<br>AGACTAAAACCAAACCTCTGGCTTAAACCTCCCTCTTATG<br>ATTATAAATTATTTACAAGACTTTTATTGTTAGAGCTGGGC<br>TTGAAAGGGGCACACATTAGGATTTTCTGTTTCTTATTA<br>GGAATAGGTTTTATCCCAGCCATTTCTGCAGCAAAGTGATT<br>TGAATACTGTATAGCATTACCTCTTATTGATTTGTAGCTGT<br>TTCTGCTTGTTTTATATTCTGTTGATAGTGCCTGAAAATGTC<br>TGTATTGTGTTAGGGGTGCTGGAGTGGGATCAAGAAAGAGG<br>TGTCAAGTTCCCGAGCTCCAGCAGTACTGTCAGCAAGGGAC<br>AGAAGGTGAATGCAGCTTGTAGGCGTATGGCAACAGCAAAG<br>AAGCAGGCTTCTATGTAACCTGTTAGGGATGGGTAAGAAATG |

|                |      |      |         |       |      |                                                                                                                                                                                                                                                                                                                                                                                                                                                                                                                                                                                                                                                                                                                                                                                                                                                                                                                                                                                                                                                                                                                                                                                    |
|----------------|------|------|---------|-------|------|------------------------------------------------------------------------------------------------------------------------------------------------------------------------------------------------------------------------------------------------------------------------------------------------------------------------------------------------------------------------------------------------------------------------------------------------------------------------------------------------------------------------------------------------------------------------------------------------------------------------------------------------------------------------------------------------------------------------------------------------------------------------------------------------------------------------------------------------------------------------------------------------------------------------------------------------------------------------------------------------------------------------------------------------------------------------------------------------------------------------------------------------------------------------------------|
| MSTRG.53403.3  | 1.09 | 0.28 | 0.04362 | -1.99 | down | GGGCTTCACTGAAGGGCCCGAGGGAGGAAGCGCCGGGGTCCG<br>GCACGAGCGTCCCCGAGCGGGCGGGGCCGTGAACGGCCGCT<br>TCCCGCAGGCAGGCTTCCACGACGCACCGGCACCTCGGCGAG<br>CCTCCTTCCCTCCTTACGGGTGGGCTGGGGCTTCGTAGTTTT<br>GGGCTGCGAGGGGAGGCTCCCTGCCCAACGGGAACTAAATT<br>CCCAGAGACGGCCCTACCTGGAATAACAAGGCATGAGAGGAC<br>CCCAGGGTATCTGAGGCCTGGTTCATGGGATTCTTTTCGGAG<br>CGTTGACTTTGGAGCATGGTTTCTGTCATTTTCTGGACATGT<br>CTCAGGGCCCAGCAAGAGAAAAGGCGGTCTGGACAGCAGCCAG<br>AGGAAGTTGTGATGAAGGAATTATTGACTCGGTGCGAGTAGGT<br>GTGTGTGCTCACTTTTCTGAAAGAAAAGTGAAGTCGCT<br>CAGTCGTGTCCGACTCTGCGACCCCATGGACTGTAGCCTGCC<br>AGGCTCCTCCATCCATGGAATTTTCCAGGCAAGACTGGA<br>GTGGGCTGCCATTTCCCTTCTCCAGGAGATCTTCCCGACCCAG<br>GGATTGAACCCGTGTCTCCTGCATTGTAGGCACACCACGTTT<br>TCTGAAGGGCTTTGAAATCAGTCTTTATTTGCCCTGAATAAG<br>AAAAGGGTAGAACGCACAATGCGAAAATGGGAAGATCCCTGA<br>ACTTTCTGTGTCAGGACCTTCATCCAAGTCACTTCTGCTCCG<br>TGAGCCTCAGTTTCCACTTCTGTAAAGCTGGATTGGGGTGGC<br>GTTGGCAGTCTTGGTTAAAGGGTAGACATGGCAGGGGCTGCT<br>TCACTTGTTTCTGTCCATACGTAATCTCCTCTTTATGGGAAC<br>TGAGTCACTGATAGTGCTTCTGAAAATCTCCTTGGAGATGG<br>TATCAGGCAGATCATTGCACTTATCCTGCTGCTGCTGCTAAG<br>TCGCTTCAGTCGTGTTCCGGCTCTGTGCGACCCCATAGACGGC<br>AGCCACCAGGCTCCCCGTCTCTGGGATTCTCCAGGCAAGA |
| MSTRG.186142.1 | 0.42 | 0.11 | 0.02735 | -2.02 | down | AGTATAAATAATATATGAAAATAAAGTTGTTTGTACTTTAAG<br>GTGCATAGAATACATTTGTTCTAGAGAGAGCTTAAAATAGAT<br>TCTCAATTAATTATCATTGGACAATGAAATCAGATGCTTTC<br>TGGTGCTCTAATTTATCACAGCCTTGAATAAAATCAATTTA<br>GTCTGTCACTTATAGTTGTAGTTCATTGAATTTTGATTAA<br>ATGCACACTTAACAAGTACTTTTAAAAGAAAATGCCGCTAA<br>GTCACTTCAGTCGTGTCGACTCTGTGCGACCCCATAGACGG<br>CAGCCCACTAGGCTCCCCGTCCCTGGGATTCTCCAGGCAAG<br>AACACTGGAGTGGGTGCCATTTCCCTTCTCCAATGCATGAAA<br>GTGAAAAGTGAAGTGAAGTCACTCAGTGGTGTCTGACTCTT<br>CACGACCCCATGGACTGCAGCCACCAGGCTCCTCCATCCAT<br>GGGATTTTCCAGGCAAGAGTACTGGAGTGGGGTGCCTAGTGA<br>TACCATATTTTACAGTCAAACCTGGATGAAACTAGTTGTTTC<br>ATTGTTTTAATATATTATAAGAATATTGGGTACCATACTCAT<br>AATAATTCAGTTTTATTTGTAATTTTGATAAATACTCATATC<br>TGCTCCAGTTTGGTTAGATACTTAGTTTGAAGTTGAATTTGT<br>TCTTAATTGATCAATACTTGGCTATAGCCTGACAGTCTGTTT<br>CAAATGGTGTGTGTGTGTGTATACATTTGCCCTTATTTTG<br>TTTGAAAATATTATTTTAAAATATTTGAGACCAACAAATTA<br>AAATATCTGAGTATGTGATTGCATTGATCTGGACTCTGTTTT<br>ACAGCTGAAGAATTCTTGCAGTAATGACAAATCGATTA AAC<br>ATTTAAACCATCATATTGGATGGCATAACCCCAAAGTTTAT<br>GAAAAGTTGCTATTTCTCTGGACCCTCCAAGGTGAATGTACA<br>ACCTGAGACTATAAATGCATGTAGCTTAATGCCTGTGAACCA<br>TCAAAGGAAAACATTGTCCAGATTCTGAGTGAAGTGAAGT        |

|                |      |      |         |       |      |                                                                                                                                                                                                                                                                                                                                                                                                                                                                                                                                                                                                                                                                                                                                                                                                                                                                                                                                                                                                                                                                                                                                                                                                                                       |
|----------------|------|------|---------|-------|------|---------------------------------------------------------------------------------------------------------------------------------------------------------------------------------------------------------------------------------------------------------------------------------------------------------------------------------------------------------------------------------------------------------------------------------------------------------------------------------------------------------------------------------------------------------------------------------------------------------------------------------------------------------------------------------------------------------------------------------------------------------------------------------------------------------------------------------------------------------------------------------------------------------------------------------------------------------------------------------------------------------------------------------------------------------------------------------------------------------------------------------------------------------------------------------------------------------------------------------------|
| MSTRG.186150.6 | 0.3  | 0.07 | 0.04201 | -2.05 | down | <p>G TTCAGATTGGAGGTTGGCTTTGGGACCTGCCTTTGTTAGAA<br/> GGTGTCTGTCTTGGGGAAGGGAATGCCTGACTAAATGTGGC<br/> AGGACACAGGAATGACCTTCATTTACTGAATGATAAATGAAT<br/> TGAATGATAATAATATCATTTTCGGATTCCAGGAAGTGACAAT<br/> ATTAGTGTGTAACAGAATAGGAAATAGAAGAGGGAAGGTGAC<br/> TCAGATAACCAGAGCAGAACTAGCATAAGAAAGAAGGAATGGG<br/> CTCCAACCTTAGAATATCATTTATGCTCTGGTGCTTCCTCCGT<br/> GCCCAAGTGAAAAGAAAATCAGTCCTTTGCACTGCAGAGTAAT<br/> AATAGCTATACATATGTGACTGCTATGTGAGAAAAGAACCTT<br/> TTAGAAGTTGCTAAGATAGCATACTGAAGCAGGTTAATTTG<br/> TTCCTAGACATTTGTTGGGCACCTCTATGTGCCAGGGTGT<br/> CCCTGGTGGTGCAGCCGGTAAAGAGTCTGCATGCAATGCGGG<br/> AGACCTGGGTTTGTTCCTGGGTTGGGAAGATCCTGGAGAAT<br/> TCCATGAACAGAGGAGCCTAGCAGACTACAGTCCTTGAGTTT<br/> GCAAAGAGTTGGACACAATAACGACTTTCATTTCACTTCT<br/> GTGTGCCAGGCTCTGTTCCCAACTGGGTGCGGCATTA<br/> CAGAGAAAACCTTTGTTCTCTGGCCATTTACATTGTGGTAG<br/> GAAGCAAGTGTCCCTCAACAGAGCTTGTCCCTGTTATTCTGGT<br/> GACCACATTAGGAGCATTGCTTACAGGATGATGGCTGAAGTA</p>                                                                                                                                                                                                                                                                                            |
| MSTRG.43306.1  | 0.63 | 0.15 | 0.04299 | -2.12 | down | <p>CAGCGCCAAAGATACAGGACGCTCAGAGACAATACCGCCCAG<br/> CCTGGGTGCAGCACTCTGCCCTCACGTCTGGAGGTTCTCAAC<br/> GCTTTGTGAACAAAGGAGCCTCCATTTCCACTTTGCTCTGAG<br/> CCCACAACCTCTGGGGAGTTTTTCACGGCAAGAAAGAGAAGG<br/> TGCCAGCTTTGCACCCAGCCGTCTGGCCTCGAAGCCCAGCCT<br/> TCTCATCTCAGCGGCTCATGAGGACCTTGCAAGATGGAGGA<br/> AACTGACCCCGGAGCAGACCCGGCCCGCAGCAGCTCAGTATC<br/> AGTCCCGTCTCTGCTGGACTGGCCTTCACGATCCAGAACGA<br/> GTTCAGGGCTAGATCAGAGCTTCCTGGCGTCGTGGCTGCAGC<br/> TGGTGTGGTGAAAGGGCTGGTGTGGTGGAAAGGAGACGAGTGC<br/> TTGAGCAGAGGATTCTACCTCTCGTGTCCCATATCTTCTGAA<br/> TCAGAATCTGGGGGTGGTGCATGCTGTGGGGACCTGGGAATA<br/> TGTGTTTCTTAAGAGAAAGGAATGGAATGAAAGAAAAGCAC<br/> TTCTCCAGAGATTCTGATGGAAATCCAGCCTCAGAACTATC<br/> CGTTCAGATGACAAGACTACTGTCAAGCCTGCTATCCATGTC<br/> CTCGCTGAAGACAGAGCTGGAGGGCACACATCTCTGAGCTGC<br/> ACACCTGGGCAGAGCGGTGCACACAGGAGAAGAGCAGTGTTT<br/> TCGCTGTGGCTCACGTTTCAGCAAGTGGCCTCTTTCTCCACT<br/> TACACTGGGGGAAGGATCATTGATGGTGGGACAGGTCAGT<br/> CTGAATTTTACCATGCTACAATTTCCAGGGTGGTGAACAGA<br/> AACATCTGGAAAGAAAACAGCTGTTTTGGGCAATTTTCCCC<br/> CAAATCAAATCTTACAGACGGAGAATGACCACCTTGTGC<br/> TGCCATATTCTGAACTTTAAGGACTGTCTGTTCTGTTACTT<br/> TTGTTTGAACGTAAAGGAAATAAAGTTAAGAACAGTGATGC<br/> TATACATACTGACAGTCTGTCTCCCTGACTGAACCTGAGTTG</p> |

|                |      |      |         |       |      |                                                                                                                                                                                                                                                                                                                                                                                                                                                                                                                                                                                                                                                                                                                                                                                                                                                                                                                                                                                                                                                                                                                                                                                                                                            |
|----------------|------|------|---------|-------|------|--------------------------------------------------------------------------------------------------------------------------------------------------------------------------------------------------------------------------------------------------------------------------------------------------------------------------------------------------------------------------------------------------------------------------------------------------------------------------------------------------------------------------------------------------------------------------------------------------------------------------------------------------------------------------------------------------------------------------------------------------------------------------------------------------------------------------------------------------------------------------------------------------------------------------------------------------------------------------------------------------------------------------------------------------------------------------------------------------------------------------------------------------------------------------------------------------------------------------------------------|
| MSTRG.210622.4 | 0.11 | 0.02 | 0.03043 | -2.14 | down | <p>CCTGTGGAAGTGGCTGAGTGGCAGTGTGTCCCAGGAATACTC<br/> CTCAGGGTTCAGGTTTGGTACTGCTACTGGAGGACTCAGGT<br/> AGGGTCATTTGTACCTCGTGATGGACAGCATTACCCTTTCTG<br/> CTGAAAGCACAAGGACATCCTATACTTGCAACTGGATATAGG<br/> GTAATAACCACATGAACAGAAGATGGGAGACAGATACTCTGT<br/> CTCGAGTTTCTGCATACTTCATTAGATGCATTTGTGAAGAAT<br/> TTCTGGCCTTTGGGTCTGTTGCCATTTGTAAGCACCCATGAG<br/> TAGATTTCACTTACTGGAACCTATATGCTTTCTTGGTTTTCA<br/> AATTTGATGGCAGAGGGAAGAAGAGGCAGGACAGCTGCCTTC<br/> TTATCTGATTTCCCCCTTGACAGACAAGGAAGCAGCCACACTC<br/> CAAATCTACTGCATCCTAGACCTCCCCAGAAGCCAGGAAATG<br/> GAATTGGAGCCAGCCTCACCTCTTTGGGCCAAAGAGATTGT<br/> GGTAGAGCGTCCGGAAGCGCTTGCAGCGTGTAGTTGCAGCGAT<br/> AAGCCCCTCCCATCAGGTAAGTACTCGATCACCAGGCCAATATCGA<br/> TCAGGCTGATTCTGTAGTCTGGGGCAGGTTCCCCTACCAGG<br/> GAAGAATGGAACACACACACATCCAAGAGACAAGGGGTTTA<br/> CTAGGGATTCTACTCCGTGTGTTCTGTAACATTTTTAGACTA<br/> AAATAATAATAATAATTAATAAAGAAACATATTAATGTATTAT<br/> TATGCTGGTTAATCAATTCACCTTAAATAGATCCAACCGAA<br/> ACCTGGATATTCTCGCTTGAAAGAAGACATAAGTTAAATAA<br/> GAAGATGCAGTAATCGTCGCAATAACAGAAAATCAAATAT<br/> TTATTCAAGTCTTCAGCTGGGAGAAAAAACACCAGTGTAG<br/> CAGAAAGAAACAAAAATGGCAAATTCACCACTCCCAGCCAC<br/> TAAGGAAGTAGGTTCCAGATGCTCCCCAGACCCCTTCACT<br/> GCTCTGCCTCGGACCCGGGCTGTTACTGGCCTCTTGCTGAT</p> |
| MSTRG.26889.3  | 0.55 | 0.13 | 0.03102 | -2.14 | down | <p>TGCAAAACGGGGACTGAATTAAGCAGCCTCCAGGGAACGTGGG<br/> CTCCACGTACAACAGCTCCTGCCATGCCCCGCTGGGAGGGG<br/> GCAGGCAGGAACGTGCTGGGCTCGGAATAAGCAGCAGACA<br/> CTTGTCTGCAGGCCAGGTGCCTGGATGCAGACAGAGTGGGC<br/> AAGCCCTCTGTCTCCGTGCTCCCTGATCACCCACCCGGGGC<br/> TCGGAGGACACCAGGTACCTGCCAGTCGTCAGCCAGAGGCA<br/> GGGAGGAAGTTTCATGTGAGAAAAAGGACGGTTTGGACTCC<br/> AGAATGGACGGTGCAGACTGGTCTTTCTGTGCAATCATACA<br/> AGCAAACGCAGAGGTGGCAACATCCCCAGGTTCCATCAGCAG<br/> GGATGGTAAACTCAACGGGTAATCTACACAGCAGAATGA<br/> TACTCGGCCTCGAAAAGGACTGGAATGCTGGTTCTGCTACC<br/> ATGGGTGAGCCTGAAAAACCTTATCTGAGTAAAGAAGTCTGT<br/> CTTTGAAGGTCACTAACTGTACGGTCCCTGCACAGGAAAACC<br/> CAGAAACGGGAAACCTAGACACAGGAAGCAGAACAGTGGGGG<br/> CTCCGGAGGTGGGGGAAGGAAGTGAAGACTGTTTCAGGGT<br/> GACGGAAACTTCTCAATGATGACTATGTGCTGCTCTCACACG<br/> CCTGCATGAAGTGAAGCCCTGTGTGCCCTCTGGGATCCCA<br/> AACCAACTGTTAGAACTATTAAGACATCTCTCCACAATT<br/> TCTCTGCTCGCTCACCTCTGAACCAGGCTAAGTATTTCTCT<br/> CCAGGTTGACCCCTGGGTCATTAGCAGACCTGCATTGCTGCT<br/> GCCAGGAGGCTGGGTACCAGGTCATAGGAGCTCACCTCGCTC<br/> CCTCTGTCTGAACTGCCCTTAATTTAAATAACAAGGCTGCTG<br/> CAGCTGAGGTGGCATCTCTCAGAGGAAGGTCATAAATTAGCA<br/> ATTCATAGAAGCAGGACACATGCGCACATGACCTGGAGTGAG<br/> TCCAGCACCTCTGTCAAGGATGAAGCTCCTGGGTCCTGCTC</p>              |

|               |      |      |         |       |      |                                                                                                                                                                                                                                                                                                                                                                                                                                                                                                                                                                                                                                                                                                                                                                                                                                                                                                                                                                                                                                                                                                                                                                                                                                              |
|---------------|------|------|---------|-------|------|----------------------------------------------------------------------------------------------------------------------------------------------------------------------------------------------------------------------------------------------------------------------------------------------------------------------------------------------------------------------------------------------------------------------------------------------------------------------------------------------------------------------------------------------------------------------------------------------------------------------------------------------------------------------------------------------------------------------------------------------------------------------------------------------------------------------------------------------------------------------------------------------------------------------------------------------------------------------------------------------------------------------------------------------------------------------------------------------------------------------------------------------------------------------------------------------------------------------------------------------|
| MSTRG.46959.6 | 0.39 | 0.08 | 0.03738 | -2.27 | down | <p>TCAAGACGCAGAGACTCGGAGGCGGAGAAGAGGAACACAGAA<br/> CCAGAAGGAAGGGACCCCGAGGGCGGGGAGGAAGACCCAGG<br/> ACATGAAAGGGGAAATTGAGGTGGAAATTGAGAGACCCAGAG<br/> ATGCAGAAAAACAGCAATAGAAAGTGGTTAGAGAAAGCTGC<br/> GGGCCAGGCAGATTCTTTACTGATTGAGCCACCAGGGAAGAT<br/> CCAGCCCCAAGGTCAGTAGCATGGAGGCTGAGAACCCTGCT<br/> GTAAGTGGAAACAGACCTTTGAACGTCACCTTGTATGGCATAA<br/> GGAATTATGCAGCTATGATTTAGCTAAAGATCTTGAGCTGGG<br/> AAGATGATCCTGGATGATCTGAGTGGGCCCAATGGAATCACG<br/> GGAGTCCTTATAAGATGGAGGCTGAAGGAGGTTTGACCACAG<br/> AAGAGGAGAAGGCAGAGAGAATGACAGAACCAGATTGAAAGG<br/> AGGCACATTGAAGAGGGAAGAAGGGGCCACAAGCCAAGGGAT<br/> GCAAGTCACCACTGGAAGTTGGAGAAGACAAGGAAACAGCCT<br/> CTCCTCAGAGCCTCCGGCAGGAGCCAGCCCTGCCAGCATCTT<br/> GACTTCAGTCCAGAGACTGATTTTCAGACTTCTGACCTCCAGA<br/> ACTCTAAGTAAATAAATTTGTGCTCTTAAGC</p>                                                                                                                                                                                                                                                                                                                                                                                                                                                        |
| MSTRG.34606.1 | 0.19 | 0.04 | 0.04543 | -2.27 | down | <p>GCTTTAAAGGCATGAGCTCTGATTTAATATCACTTAGGCAGC<br/> CACCAAAGAACATAAAGAATGAGGCTGCTGACCTTGTTCCTG<br/> ACAGACATTTTTTCGGTTTTTCATGTTCCAAAAATTATTAAGAA<br/> GGGGCTTCTATCAACATGACTTTTCTGAGTCTCTTGTGTTT<br/> ATGAGGAGAGCTTTGCTGATGTACTCACGATTTCAAAGTGA<br/> AGAGCTCTCTGAGAATTCAGCTGCCAGAGATAGAGAGAGAGA<br/> GAGAGAAGACTTACCCTCAGCACCTAGAGAATGTGAGAATTC<br/> TGCTGCCACAAATCCCCCTCCAGGGACCTTCCAGCCAGGCAG<br/> GATAATGACCATTGACACCAGCACCTGGATGAGAATTGTGAA<br/> AATGTGTCCACAAACCTTATAAGAACCTCCACACTTTCCCAC<br/> AGAAGCTCTGACCACCAACATGCCCTTATTATGCTGATAGTA<br/> TATAAACCTTTACCCATGGCTGTTCAAAGAGATTCTCTTTAT<br/> AGAATGCTGCTGCATGAGTGTATGATAACATTTTCTCTTGTT<br/> ACTCTGAAGAAAACCTCCAGATTGTCAATTAATTCGCAGGTCC<br/> CAACTACCACCATTGACACCTCACTTGGTCAAGGAAAAGTTT<br/> TCCTGCCAGGTCTCCAAAATCAACAAGCCACTGAAATGACCC<br/> TACTCGCCCTCACCTCCAGGATTCCTGCCATGAGAGAATAAA<br/> CCACAGTTTGTAAAGCCACTATTGGTTGGATTTTCTGCAAC<br/> TTGAAGCAGAAAGAAGAGCCAGTAGTTTACCCTGTTTATTCT<br/> TTTTGAGCCAAGACACAAGTGCCCACTCTCCATTCACCAAAA<br/> TGATGGGAAAAGTCATAGTTCAGACTTGGATGCCAGAACAAT<br/> CACAAAAGAAAGTGAACCTTGTCTGGTCAGATCTATGTTCC<br/> AACTCCTATACATCACTAATGTAGATCAGCTTCTCACACTTT<br/> TTCTTTGCACAACATATCAACTCTGGATTAATCTGGTAAA<br/> ATGAATAAGACATTTTTAAACACTGCCATGGCTTTCAAAA</p> |

|                |      |      |         |       |      |                                                                                                                                                                                                                                                                                                                                                                                                                                                                                                                                                                                                                                                                                                                                                                                                                                                                                                                                                                                                                                                                                                                                                                                                                            |
|----------------|------|------|---------|-------|------|----------------------------------------------------------------------------------------------------------------------------------------------------------------------------------------------------------------------------------------------------------------------------------------------------------------------------------------------------------------------------------------------------------------------------------------------------------------------------------------------------------------------------------------------------------------------------------------------------------------------------------------------------------------------------------------------------------------------------------------------------------------------------------------------------------------------------------------------------------------------------------------------------------------------------------------------------------------------------------------------------------------------------------------------------------------------------------------------------------------------------------------------------------------------------------------------------------------------------|
| MSTRG.143209.3 | 0.47 | 0.09 | 0.01943 | -2.28 | down | <p>TGATCTTGGGTGTGTGTGTGTGTGTGTGTGTGTGTGTGTGCG<br/> TCCGTGCGGGGAGGGGAGGGGCGCTACTATCACTGATAGGT<br/> ATGTTACCAATCTGTGCAATGCCAATATAAAAGTCAGTTCT<br/> TGGTTGCTGAAGGAACTGTATGACTTGGTATTAAGAAGG<br/> TATGTGGCATGAAATCGCATTCTGAAGGAAAACGACGTCG<br/> TTCTTTCTCCAGGTGGCAGTTTCAGGATGGGAGAAGCAAAG<br/> GAATGGGTACAGAATGGGATCAGGAGGTTGTAGGGAACGTGG<br/> ACCCCAGAAAAGAGTGTGTGCCTAGCACAAGGTTTCTTGA<br/> GAGGTTGAACTGCCTTTGCTAATGGATTTAAAGTTTCTTTAC<br/> CTCTTCCGTGATCTCTTCTAGGTTGACCTAGAACAGAAATCT<br/> TTTGTTAGCTTTGGCTAAGTGGAGAAGTATTGCTTCACGGTG<br/> ACTTGTGTGATCCTACCTGACTGTTCTAAAACCTTTTGATAT<br/> CTATGACTGCTGCTGCTGCTGCTGCTGCTGCGAAGTCGTTT<br/> CAGTCGTGTCCGAGTCTGTGTGACCCCATGGACGGCAGCCCA<br/> CCAGGCCCCGAGTCCCTGGGGTTCTCCAGGCAAGAACACTG</p>                                                                                                                                                                                                                                                                                                                                                                                                                                                                                      |
| MSTRG.14510.5  | 0.33 | 0.06 | 0.01719 | -2.3  | down | <p>CCCGGCTCTCCTGATCGAAACTCCGAGCCAGAGCTCTCCGC<br/> GCGCGCCCCAGCCGCTGGCCGCCCCGCGCAGCCGGACGCGGAA<br/> CCCCGGCGCAGCGGGAGCCTTGCAGGACGGGCGCGGGGCGGC<br/> GGCGGCAGCCGTCCATGCGGCGGGCTCGGGGCTGCCCGGCGC<br/> CGGAACCACGCGGGGGCCAGGCAAGGCGGCCACTGGCCGCA<br/> CCGGGACTCGGACCGCCAGGAGTTGAACATCACCCCATCTG<br/> CAGAAAATTGGCAACATCTCTGAGGAGCCCTTGCTTTTTCT<br/> GGGACACCAGGACCATGGTTTCTGTGTCATGGAGTCTCTC<br/> AGTGTCTGGGTTCCCTCCTGCTGCTGGACTCCAGCTCGTC<br/> TGCCCGCAGCCCTCCACTGAACACAGAAAGTTGCCAGGATCA<br/> TTGTCATTGTCATTACCTCAGAGAAGGAAGATTCAGTGCTT<br/> TTTTGGGTCGAAATTTCTTCTGACGTTTGTGGAGTTCT<br/> GTGAAGCCGTGGCTGTCATCCTTCTGACTGTCCCAGAGCC<br/> CTGGAGCAGCGACAGTACTGGCAGTAATAGCATCCGTTTATT<br/> TCTGCAACATGAGAAATAAGGAGATACCTATTAACAGAGG<br/> CTGGAATGTTTTCTATAAATGGTCAGTTGTGATTGTTCTA<br/> GGCTTTCTGGGCTACAAAATCTCTGTCACAACTAGTCAGCTC<br/> TGCTTTGTAGCACAAATTCAGTCATAAACAACTTGTCATA<br/> AATGTACATGTCTGTGTTCCAATAATACTTTATTTGCAAAAC<br/> ACTGGATTTGGCCATAACCCACCGTTTGCCAGCCACTGCTC<br/> TAAAGTCAAGATAGAGAAGAGTAACTGTAATTACTGTATAT<br/> GTATTTGAAAGTTGGAAATTGTCTCCTCCTGGGACCTTAAGA<br/> AACACAAAGGATTTGAGGGGAAAAAAAAGTATATTTTTTAGG<br/> GGAAAAATATATTTTTTCATGAAAACATAAGAATTATGATTG<br/> CTATCAAATGTTTTCGTTGCTTGGATAAATCATGATTGAAT</p> |

|               |      |      |         |       |      |                                                                                                                                                                                                                                                                                                                                                                                                                                                                                                                                                                                                                                                                                                                                                                                                                                                                                                                                                                                                                                                                                                                                                                                                                                      |
|---------------|------|------|---------|-------|------|--------------------------------------------------------------------------------------------------------------------------------------------------------------------------------------------------------------------------------------------------------------------------------------------------------------------------------------------------------------------------------------------------------------------------------------------------------------------------------------------------------------------------------------------------------------------------------------------------------------------------------------------------------------------------------------------------------------------------------------------------------------------------------------------------------------------------------------------------------------------------------------------------------------------------------------------------------------------------------------------------------------------------------------------------------------------------------------------------------------------------------------------------------------------------------------------------------------------------------------|
| MSTRG.68876.1 | 0.58 | 0.1  | 0.01727 | -2.32 | down | <p>CCGGAATAGATTCTCCTGCCAGTGTGTTAAATTTGCTCGCAG<br/> GTTACCTTTGTGTGTCCACCAGCATGAACTGCATAAGGGAA<br/> TGCAAATGAGCCCCTACCTGGGGAAATCTGAGGCCAGAAGGA<br/> AGACAACCTGCAGGAGAGGAAGGTGACGGCAATTAAGAAGG<br/> GATCGCCTCACTCCAGAATGTCCGAGGCCCTTTGGAGAACT<br/> GCTGTTTCCCCAAACCCTCTACATGGCCGCTTGCTAGCAGG<br/> TCTCCCAGCGATCACCTCCATTGGTTTTGCCTTTTGGCAA<br/> AACTGTTTGTGAATCAATGTCAGCACTGCGAGTGAGGCCAG<br/> AAACCCCTCTCACAACCTTGGCCGAAGCAGGAATTCATGGGA<br/> GCTGCAAAGGGTTACGAATAAAATGCAGTCACAAAGGGTCAA<br/> ACGTGGATTCTGCCTTCTTTCTGAGACCCACCCCTCCTTCA<br/> CAGAGTTTGCCTGAACCTCGGCCACATTCAGTCCGGTATGA<br/> TTATCAGAACCGCTGAGTCTCAAGTTTGCAGCTTGCTCCGTT<br/> CATTTCGTGCATCCCATCGGTGAGAAGAAGTGTCTGCAGTCA<br/> TCCTTCATATTGGGAGGGATGAGCTGAAGGAGGCAGGGAGAT<br/> GTCTCCTAAGGAGGAGTCTTTCCAGCTATCATGGCTTCCAA<br/> ACCTGCTTATCTGGTTCTCTGGCAACAGTTCACAGAAGC<br/> TGTAATGTATAAATATGGGGACTCCCCCTTGCTCTCTCACAA</p>                                                                                                                                                                                                                                                                                                                                                 |
| MSTRG.13394.1 | 0.13 | 0.02 | 0.03567 | -2.37 | down | <p>GGAAAACCCAGCAAAGAGAAGGAAACTATTTAACCACCTTG<br/> TCCACTGATAAGAAGAGCTTTATGGAGCACTTCTGAAAGATT<br/> TTACAGAAGGACTAGACGTGCAGATTGGTACATTATAAAGAT<br/> AAATTTGGGGTGAAGCAAGCACAGGTTGCAGAAGGCTAACA<br/> GAGCCAGAGAAACAACCTAAGAATAATCCAGAAGAGTGGAGGA<br/> GAGCCTGAAGCAGAACACTGGCATCAGGAATGGCGAGGAGGG<br/> GGAGAATAAGAAAGAAACCCAAGGACACAATAGGACTTGGAA<br/> GCCAATGGGCTCTGAGCGGGCGGCTCTTGGATGCTGGTATGA<br/> CCCACTAAGACAGGCACTGGTTGGGCAAAAGCAGGAACCTTG<br/> GTGAGCGGGTCTGAGTCGGGGTCTAGAGGTGCTGTGGAACA<br/> CAGGAAAGACATCTACCAGATACCTACTTTGCGCCCTCCTGA<br/> CCTCGGGGAGGAAGAAGGAATGAACTCTCCACTTGAGTTTAC<br/> TGGTTGGCAGATGGCAGTTTGGTGTGAATGCATCTGAGACCA<br/> AGTGTTACCTTAGCCAGTAATGTCGGTTTCAAGACTTTTGCT<br/> TACTTACTACTTACTGGAACCTACTTTCTAATTTCTTATT<br/> GGGTGGTTGGGGAGAAGGCATGGGTAGATGCCAGCAATAAA<br/> GTAAACAGGTGGGACAATCCTTCAGGACTCAACCTGCCTCCT<br/> GGGAGACCTCCAGCCCATGTAGGCTGCCACCCGTGGCTTCCA<br/> CAGCGGCCTGCCTTCTCTGTAGCTGACATCAACACTGCTGTT<br/> TCCTGCGTCACGTCTGCAGCTTCTACCAGACTAAGTTCTTGG<br/> AGAGCTAAGACTGGATCTGTCTTAATTTGTATTCCAGACA<br/> AAAAACGAGCACTCGATTGTTCACTGAGTGAATAAACG<br/> AAAGAATGAACTGAGGTTGGGATACAGGAGTTATAATGTTGT<br/> CCTTTTAAGCTGCCGAGAAGATTGAAAGACTATCCTTTTTTC<br/> TTCAAACACCATCAAATGGCCTTTGTCCCTGGGAGGTGCT</p> |



|                |      |      |         |       |      |                                                                                                                                                                                                                                                                                                                                                                                                                                                                                                                                                                                                                                                                                                                                                                                                                                                                                                                                                                                                                                                                                                                                                                                   |
|----------------|------|------|---------|-------|------|-----------------------------------------------------------------------------------------------------------------------------------------------------------------------------------------------------------------------------------------------------------------------------------------------------------------------------------------------------------------------------------------------------------------------------------------------------------------------------------------------------------------------------------------------------------------------------------------------------------------------------------------------------------------------------------------------------------------------------------------------------------------------------------------------------------------------------------------------------------------------------------------------------------------------------------------------------------------------------------------------------------------------------------------------------------------------------------------------------------------------------------------------------------------------------------|
| MSTRG.122651.2 | 0.73 | 0.14 | 0.03192 | -2.4  | down | CACGGCGGGGAAGGAGGGAGGGCACACAGGAAATACAGGGTA<br>AGGGGGCGGGGAGTCCAGAAGATCAGAATCACCCCAGAGGA<br>TCTTCCACCTTTTTACCCGTCCAGACGTCCCAGGAGAGCCA<br>GGGACTAGATTTCGGGAGATGGGACGGCGGCAGAGAGAAGACA<br>GCAAGCTCCCAGCTGTAGCCAATCCCTGCCAGGGCTGCGGC<br>TCACCCGCCTCTGGCGGTGGGGACCTTCTAGCTTCTGGCAAC<br>CCCAATCCATCCGACTTACTTGTGTCAGTTACAAACCTGTCC<br>GGTGTTTTCACCCAACATATTAGCGAGTTTGAGGGAAACTCT<br>AAAGGTCTCTCCTTTACTGACTCCTTTAATCCCATTTTAAAA<br>AAGACAACCGAAGAACGCCGGCACCGGCCAGGCAACTCCGCG<br>GCCAGCCCCGCCGTCAGGCCCCGCCCGCTCCATCGGGGTCT<br>TACTCGCTCTGGCTCCTTGCCCCGTTTCGGGCTGTGTCAGG<br>AACTTTCTGGAGCTCTCTGGGCTCAGAGGCGGGGACTGGCTC<br>GTAGGAACACTCTTCAACAAACAAACTGCCCCACCCAAGTCT<br>CCCTCCCCGCCCTTCGCCCCCTGCCCGCCGCCACCCTAAG<br>ACTTCAAGCTTAGTCACGGCTCTACATTTAGCTTCCAGAAGA<br>TTCTTGCTAGCCTAGCCCTAGTAACGGGGCTCCCCCTCCCTT<br>CCTCTGTAAACAACCGACCAGTCTGTGATAACGGGAAGGGGA<br>GACGGTCTCGGAGAACCTGGAAGGGCTGAAAAGGTGGAAGT<br>GTGGGTGTTGGCGGGGAAAGCGGCGGAGCTGGGTGCGTAGA<br>TAGGCGTGAGTCAGAAGCAACAGCCTGGAGAGCGTGAACGA<br>TAGGGTTTATGTGCCAGCATTGAGAGGAGTCCAAAGTAGAAA<br>GTAGGCCGACATGTTAGTTCAATCACCGGTTCCGTAATTACC<br>TGTCTGGGTGATCTGGCCAAGCCACGAAACCTCTGAACCTTT<br>GTGCTCATCTTTGAAAAACAGAAAGGTTTGCTGAAGGACTCT |
| MSTRG.70112.1  | 0.37 | 0.06 | 0.01603 | -2.44 | down | GACAAATCTGGCCTCGGGGAGCTTTCGCCGTGCTCAAGACCA<br>CCAACAACACCATCCAGGGCGGGGGCTGGGAGCTCTGCAGAC<br>ATGAGCACACTGGGCATTGTGTGCTCACGGATGTTTATTCTG<br>AGTTGCTGGAAAACCTTGTGCGGTAGGTCTAGGAGTCAGTCG<br>TGCTGGGCAGGGTTCATGGAAGGCTTCTGGAAGTGGAGTAAG<br>GGTGTCTCAGAGAATCTTATTTCTTGGAAAGATGAGGCAGAG<br>GTCCAGAGAGTGACTTCTCAGGGTCCCTAGGGAGCCAGTGGC<br>AGCTGCAACCCTCTGCTGGTGCTCCCCATAACCGCCACGCGA<br>TGCAGGAGGGCCTCAGGCTGCTGGCTGCCGTTGCGTCCCAGG<br>CTGGGCTGCGTCTCCAGAGCTCAGAGAACGAGCAGGAGAAGT<br>CCTACAAACGGAAGCTGCATTGCTCTCTGACTCTTCCAGACGC<br>GTTTGGCGCTTCCCTGGCAGCTTCTGGAATGCATCATTTTGT<br>GAGGCGCGGGTTCATCTGAAGGCAGTGGACCTGGTGTTAT<br>ACTAAAACATCACATATGTTTAGCAGTTCCAAAACACATG<br>TAGGGTCTGCCTACCGTAGGCTGAGCTGGTTTCAGGGCGGA<br>GGGGAGGTTTTACCTCTGCTAATGATCATTAAACAGTAAAC<br>CGGGCTAAGAACCTACCCATTGCTGGGGTGGGCACCAGCGAG<br>TCCCTGGGTGGGACCAGAAGGTCTTCTCTCTGTGATTGCT<br>TTCTGTGGTGGCAGAAGGAAGGCTGCACAGCCAGGTGGCTC<br>TCAGAGCTAAGCTGCTTCTGACGGGGGAGGCGGGCACGA<br>TGGGAGCAGACACAGCGATACAGGACCCACCCACGTGCACA<br>CCGGGAGACTCCCTTCTTATGTGGAGAGGGTGTGAATTTCA<br>GTTTCATGATCATCAACAGAAGAGATCGCTGCAAGCAGCCAT<br>GTGTGTTAAATTATTCTGAGACCCCCGTTTCTCCTTTAATGA<br>GCGGGTGCTTTCGTGTCAGGCAGCAATAGTGGCGATTTCCAC     |

|               |      |      |         |       |      |                                                                                                                                                                                                                                                                                                                                                                                                                                                                                                                                                                                                                                                                                                                                                                                                                                                                                                                                                                                                                                                                                                                                                                                                                                |
|---------------|------|------|---------|-------|------|--------------------------------------------------------------------------------------------------------------------------------------------------------------------------------------------------------------------------------------------------------------------------------------------------------------------------------------------------------------------------------------------------------------------------------------------------------------------------------------------------------------------------------------------------------------------------------------------------------------------------------------------------------------------------------------------------------------------------------------------------------------------------------------------------------------------------------------------------------------------------------------------------------------------------------------------------------------------------------------------------------------------------------------------------------------------------------------------------------------------------------------------------------------------------------------------------------------------------------|
| MSTRG.9772.9  | 0.28 | 0.05 | 0.02219 | -2.44 | down | <p>CCCGGCCGGGTGGCGTCCCAACCCCGCGCCGGGGGCGGGCC<br/> GGGCCGGCCGAGCCGAGCCGCGCGGTCCATTTTCTGGGCGG<br/> TGCTGCGAGACGCCGCGCCTGACTCGCGGTCCGGAAGCGC<br/> CATGGACCCCGGGGAACGCGCTCGCGGGCAGCGGCCGAGC<br/> CCTATCTAGATGTGGAGGAAATGGAGGACTCAGAACCAAGGA<br/> TTTCCAAGTGATTTCTTCCAAGCTCAAGACGCTAACTCTTT<br/> TAAAGCTGGTCTGTTCTAACTGAGACGACCAAAGAATATCCG<br/> TTGATAGAAAGTTCTTAAAACTACATTGCTGTTGATGTAAA<br/> GGTTTCTAACAGTAATCAGACTAAAAATTATGGATCGAAGGA<br/> ACACAACCTGCATTTACAAGAATGAGTGAATTTTTGAAAGAA<br/> AGAAAGATAACACTAAGTCATATCCAACCTTGTGACCCCAT<br/> GAACTGTAGCCCGCCAGGCTCCTCTGTCCAGGAGATTCTCCA<br/> CGCAAGGATACTGGAATGGGTTGCCATTTCTTCTTCAGGGG<br/> ATCTTCTGACCCAGGAGTGGAACCTCAGGTCTCCTGCATTGT<br/> AGATAGATTCTTTACCAGCTGAGCTACATGGGAAGCCTACAT<br/> GAATTTTTGAGAATCAGTTTAAAAATTCAGCCTTGAAGTTG<br/> GGAAGCCACGGAAGAAGAAGACTACAAAGGCAGAAAGGAGAA<br/> CTCCATGCCAAAAAAGAGTCTGAATATTATAATAAAATCA<br/> ATTATCACACACTTACTATTTGCTATGTACTTGCCCTGGCTA<br/> GGTGCCCTTCTGTGTGTGTGTGTGTGTGTGTGTGTGTGTGTG<br/> TGTGTGTGTGAAGTTGCTTCAGTCACATCTGATTCTTTGCAA<br/> CCCATGGACTCTAGCCACCAGGCTTCTCTGTCCATGGGGT<br/> TCTTAGGCAAGAATACTGGAGTGGGTTGCCATTTCTTCTC<br/> CTGGGGATCTTCCCAACTCAGGGATCGAACTCGCATCTCTTA<br/> CGTCTCCTGCGTTGGCAGGTGGGCTCTTACCCTAGCGCCA</p> |
| MSTRG.80295.2 | 0.21 | 0.04 | 0.01717 | -2.48 | down | <p>AAACCACTCCAGTATTCTTGCCACGAGAACCCCATGCACAGC<br/> ATAAAAAGGCAAAAAACATATATATTATTGGAGTTATAAACT<br/> ACATGAAGCAAAATCAGACAAAAATGAAAAATCTCTAATTAT<br/> AGCTGGAAATTTCAACACTCCTTTTACTTACTTATAGGACAA<br/> GTAGACACAAAAATAAAGACTTGACCTGCTATTTATATCAAC<br/> TTACATTTATAGAACAATTCATTCAACCACAGCAGGAAATG<br/> TTTTCTTTTCAACTGCATGTAAGATATTATCACCATAGACC<br/> ATAAAAATAAGTCCCTGTAAATTTAAAGGGCTTAAAAATATATT<br/> ATTTAACCAATAGAATTCAGCTAGAAATCAAAAAATAAAAA<br/> TACTTGAAAATTTTGCAAAATAATTTTAAATACCATATGT<br/> CTAAAGAATACATAAGTCAAGAAGAAATCATGAAGAAAATGT<br/> AAAACTTTAAACATGATGATAAAGAAAATACAGCATACTGAA<br/> ATTTCTGAGTGACAGCTGAATAGAACTACACAGAAGGGAGGG<br/> AAATTCTACCTTCAAAATCAAGGTTCTAAGTATTAATAAGTA<br/> TCAGTTAAACCCAAAGCAAAATAAAGTAGAGTGGAAT<br/> TAAGGGAAGAGAAAAATTAGAGATATAGATAAAATCAATTA<br/> GTTAATTGGTTCTATTAATAAAATCAATAAAATGACAAAC<br/> CTCTATCAGAGGCAATCAACAGAAAAGAGAGAACACACAAAT<br/> TCCCAATATCAGAAATTAATGTGGACATCAAAATTTCAA<br/> CAACCTAACTTTACATCTAAAGGAACTAGAAAAAGAACAAC<br/> AAAATGAAAAGGTAGGTGAAGGAAAGTTATCACAAGATCAG<br/> CTCAGAAATAAAATACACACAAAACAATACAAAAGTTGAATG<br/> AAACTAAGAGCTGATTCTTTGAAAAGATAAAATGAATAGACC<br/> TTAGCCAGACTCATCAAGAGAAAAGGGAGCCCAATCAAT<br/> AAAATCAGGAATAAAAGTTACTACTGACACCACAAAAAATA</p>  |

|                |      |      |         |       |      |                                                                                                                                                                                                                                                                                                                                                                                                                                                                                                                                                                                                                                                                                                                                                                                                                                                                                                                                                                                                                                                                                                                                                                                            |
|----------------|------|------|---------|-------|------|--------------------------------------------------------------------------------------------------------------------------------------------------------------------------------------------------------------------------------------------------------------------------------------------------------------------------------------------------------------------------------------------------------------------------------------------------------------------------------------------------------------------------------------------------------------------------------------------------------------------------------------------------------------------------------------------------------------------------------------------------------------------------------------------------------------------------------------------------------------------------------------------------------------------------------------------------------------------------------------------------------------------------------------------------------------------------------------------------------------------------------------------------------------------------------------------|
| MSTRG.172143.1 | 0.45 | 0.07 | 0.00871 | -2.49 | down | GCTAAGGGTTTTGTTTTGGTTCAATGCTTTTTGTCTCTGAAT<br>TGAACCATGTCTGATATTCTCTTTGTTGGATTTGCCTAATG<br>TAACTGTCCTAAAGTAATATAATTTCTGTTTTCAACCTTTCT<br>GAATCACTTTGAGAAGTGAGTGTTGCCCATGCTTTGGAACCG<br>TGGTGCTGGAGAAGACTCTTGAGAGTCCCTTGGACTGCAAGG<br>AGATAAACTAGCCAATCCTCAAGGAAATCAACCTGAGTATT<br>CATTGGAAGGACTGGTGCTGAAGCTGAAGCTCCAATACTTTG<br>GCCACCTGATGTGAAGAACTGGTGCATTGGAAAAGACCCTGA<br>TGCTGGGAAAGACTGAGGGCAAGAGGAGAAGGAGGCAATAGA<br>GAATGAGATGGTTGGATGCCATCACCAACTCAGTGGAGAAGA<br>GTTTGAGCAAATTCAGGGAAATAGTGATGGACAGGGAAACCT<br>GGTGTGCTGCAGTTCGTGGAGCTGCAGAGTTGGACACGACTT<br>AGCAACTGAATGACAGCAACAGCATACTCATGGACTGCAAG                                                                                                                                                                                                                                                                                                                                                                                                                                                                                                                                                                            |
| MSTRG.221654.5 | 2    | 0.37 | 0.01829 | -2.5  | down | ACAGAATTTAAAAATTCAGCCCTCAGTTGCACTGGCCATAATT<br>CAAGTACTCAGTAGCAACAAGTACTCAGTAGCAACATATGGC<br>TAGTGGGTACCATATTGAATGGAAGAGGCATGGAGCCTTGCC<br>ATCATGGCAAAAAGTTCCCCTGGACACAGGACTGCTCTGAAA<br>GATCTTTTCTTTGTGATTGCAGTGCAGCTGTCTGCTTCAGGA<br>AGTGAGGTCAACAGGAGCAAGGAGAATCTTAAGAGCTGCCT<br>CGCATTGTGACATGTCTGATTCCCTTGTGCAGTCCCTACAGC<br>ATGAACAAGGTAAGAGGCACTTTGGGGACTGATCCTTTGTGT<br>CTTCTTTATGCTACCATGGATTTCCCTGGGTACGTCATGTCTG<br>TTCTGTGATGTGAGGAGGTTGTGTCTCCTGCCAGAAGTATTA<br>TGGAGGTTGGCAAGCAGCGTTGACAGGCAGGGTCACAGGCTG<br>CTGCTGGTGTACTGTTCTAGAGGTGTCAACTGTGTTTCTTGG<br>AGGCCTCTGAGCAGCTGGACTGTCAGTTGTTAGTATAATTGT<br>CTTGGCATGGATATTGGAAGACTGAGGCTCTAGGGCCAAGCT<br>GTCTGGGTTTTAAATATCAGCTAGCTTTGAGGACCTTGGGAAA<br>GTGGCTTAATGGCTCTGTGCCTCAATTTCCCCATCTGTAAAA<br>TGCTGGTGATAATGGTATGTAACCTGCAGGGTTGTTTTAAGG<br>ATGAAATGAGTTGATATGTGTCCCAGTGTTAATACAGCCCC<br>TGTCTACACTATAAGCATTGATTAGTTTTTTGCTGTTGTTG<br>TTTTTGGTGTGAGGACACTGTTGTCCCTCAGATATTGTTGC<br>CAGCAAGCCTTAGGTGCAGGTGGCGCCAGTGGTAAAGAACCC<br>ACCTGCCAGTGCAGGAGACTTAAGAGACATGAGTTTCGATCCC<br>TGGGTTTCGGAAGACCCCGGGAGGAGGGCATGGTATCCCACT<br>CCAGTATTCTTGCCTGGAGAATCCTATGGACAGAGGAGCCTG<br>GCAGGCTACAGTCCATGGGGTCGCACAGAGTCAGACATGACT |

|                |      |      |         |       |      |                                                                                                                                                                                                                                                                                                                                                                                                                                                                                                                                                                                                                                                                                                                                                                                                                                                                                                                                                                                                                                                                                                                                                                                                                                                      |
|----------------|------|------|---------|-------|------|------------------------------------------------------------------------------------------------------------------------------------------------------------------------------------------------------------------------------------------------------------------------------------------------------------------------------------------------------------------------------------------------------------------------------------------------------------------------------------------------------------------------------------------------------------------------------------------------------------------------------------------------------------------------------------------------------------------------------------------------------------------------------------------------------------------------------------------------------------------------------------------------------------------------------------------------------------------------------------------------------------------------------------------------------------------------------------------------------------------------------------------------------------------------------------------------------------------------------------------------------|
| MSTRG.178915.1 | 0.25 | 0.04 | 0.03206 | -2.53 | down | <p>GTCTTATCTTTTTAAAGAGGGGAAAGAATTATTTAGGATTCA<br/> AGTACAGTCAGTAATCCATGTAAGGGGAAGCCTCTATTATAA<br/> ACCATTGTTGGAGCTAAGTATGTTTGACTTCAACAGTTGTTG<br/> AGAACATGAATCTTTGTATAGAGCATCAGCTTCTGTTTCTGA<br/> ATATGTGCTGAGATTACTATGTTGACCTTATTACAGGGTTTC<br/> TTGTAGCTATAGCAAGTGACAAGAGCTAGCAACCCCTGCAGT<br/> ATAAATCTCTGTGTTTTGGGGACCCAGTAAAGTGACTGAACT<br/> CAAATAGTGAATAGCAAAGCAAAGATTCTCCCTTCCCTCAGG<br/> GAGAGACCTGGTCTTTCTGAAGAGGAGATGACTACAAACTCT<br/> TCTTACCTTTTCAGTTTGCTTAAGATAAAAAGAAAGAATTTAA<br/> GATTCTGTAAACATTGTCTGATTTTGTCTGCTTTTTTGTAGGA<br/> GGAAACACTTGAAGTTGTTAACAGTGTTGTGGTTTGTGGTAG<br/> CTGTAGGGGTTCTCCCTTGGGAAAGAAGAGTGGTCTTCTCTA<br/> GTATTGAATAGAGCTTTATATTTTCCCTCCGTTCTGAGGAGAG<br/> TCTGGTGAGTTAACTCTGTGAAGTGCTCAAGCTGAAAATGTG<br/> AGCAAATTTCTGGAGGGAACAAGGGAGGGAAAAATAAAATGCC<br/> AAGGGGACTTTATACTGCATTGCTTTAGAACTGAATCCTGGT<br/> GAATCTCAAATAAATTATGCTGAGTAAAAGAATCCATATAGT<br/> GTATGATGTAAAATTCTAGAAAATGGAGACAGAACTGTAGTG<br/> ACAGTGGTTGGCTGGGAATATGGAGAGGGGAGGATGGGCTTA<br/> TAAAGGAGCAGGAGGAAGCTTTTATAATATGCCCACTGTTTT<br/> GATTGGGATGATGTTTCACAAATGTATGCATGTTTCATCATT<br/> CATCAAATTGTACATTTCTTTTGGCTGTACCACGTGGCTTGC<br/> AGGATCTTAATCCCCACCAGGATTGAACCTGGGCCCTCAG<br/> CAGTGAANAATGTGGAGTCCTAATCACTGGACTGCCAGAGAAT</p> |
| MSTRG.40310.2  | 0.61 | 0.08 | 0.01644 | -2.59 | down | <p>GTGCCGGCTCGGGCGGCGCCGCGGGGAGGCCGCGCACCT<br/> GTCCCTGCCCCTCTGCGCCGCCGCGCCGCTCGGCCGCGCG<br/> CACCGCCGCAAACCCGCGCCCGAGCGCAGAGCGCGCCGCG<br/> AACATGACTTCTGCCCTCAAGCTGGATTTCTCCCGGACATG<br/> ATGGTCGAGGGCCGCTGCTAGTTCCCGACAGAATGTGAGTG<br/> TGGCCGCCCGCCGCTCCGGGACGCTGGTCCGGAGCTCCGC<br/> GGAGGGAGAGGGCGGGCGGCGGCTCCTGCGCCCTGGGGAC<br/> GCGGGGGCGGCTCCGGTTCGGCCGCGCCCTGGGGTTCCGGAG<br/> CCGGCGCTGGATGCGGGGAGAGTAACGGCACAGCCAACAAGA<br/> TGAACGGCGCTTTGGATCAC</p>                                                                                                                                                                                                                                                                                                                                                                                                                                                                                                                                                                                                                                                                                                                                                                                       |

|                |      |      |         |       |      |                                                                                                                                                                                                                                                                                                                                                                                                                                                                                                                                                                                                                                                                                                                                                                                                                                                                                                                                                                                                                                                                                                                                                                                                                                                      |
|----------------|------|------|---------|-------|------|------------------------------------------------------------------------------------------------------------------------------------------------------------------------------------------------------------------------------------------------------------------------------------------------------------------------------------------------------------------------------------------------------------------------------------------------------------------------------------------------------------------------------------------------------------------------------------------------------------------------------------------------------------------------------------------------------------------------------------------------------------------------------------------------------------------------------------------------------------------------------------------------------------------------------------------------------------------------------------------------------------------------------------------------------------------------------------------------------------------------------------------------------------------------------------------------------------------------------------------------------|
| MSTRG.222581.1 | 0.49 | 0.08 | 0.01237 | -2.64 | down | <p>CCCGTGTGCACAGCCCAGAGGCGAGTTTTTACACCATTTCTC<br/> GCCAACAAATGGTATCTTTGCTCTCTGAGTGTGATCACAGGA<br/> CTGGGAGCCGGGGTGACGACCGGAATTAATAATGAGGAGAGGA<br/> TAATCCAATTTATTGAGCATTTATTATGTGCCAGGTACTGTG<br/> AGAGAATTCAAACAAGCTCCTCTCCCTTCTGAGAAATGAAAG<br/> AGTAACTCCTAACCCCTAAGGCAGAGAAGAAAATGAGACGTTT<br/> GACGAGAAGTATGTAACAACCACTGCCACCATAACATAATTGG<br/> ATGTTCTTTGTAGCAGGAAATAAGACTTGAAAATCTTAAAAT<br/> GGAAACATCTTGAGCTTCTTGTGGTCTGATTCATTCCTCATA<br/> TAGACGAGTACAATGAGAGCCAGAGAGATGGAGTAAACTCCT<br/> TGAGATCATGAAACTGGAGTCAAGACCTCACAGCTATGTTTG<br/> ATTGCTGGGAGAAATGTCAATAACCTCAGATACGCAGATGAT<br/> ACCAGCCTTATGGCAGAAAGTGAAGAGCCTCTTGATGAAGAT<br/> GAAAGAGGAGAGTGACAAAAGCTGGCTTAAAACCTCAACATTCA<br/> AAAAAATAAGATCATGGCATGCGGTCCCATTACTTCATGGCA<br/> AAAAGATGGAGAAACAATGGAAATGGTAACAGACTTTATTTT<br/> CTTGGGCTCCAAAATCACTGCAGATGATGACTTCAGCCATGA<br/> AATTAAGAGATGCTTACTCTTTGGAAGAAAATCTATGACCAA<br/> CCTAGACAGCATATTAAGAGCAGAGACATTACTTTATGATA<br/> AATGTCCATATAGTTAAAGCTATGGTTTTTCCAGTAGTCATT<br/> TATGAATGTGAGAGTTGGACCATAAAGAAAAGCTGAGACCAA<br/> AGAACGGATGCTTTTGAACCTGTGGTGTGGAGAAGACTCTTG<br/> AGAGTCACTTGGACTACAAGAAGATCAAACCAATAAATCCTA<br/> AATGAAATGAATCCTGAATATTATTGGAAAGACTGATGCTG<br/> AAGCTGAAACTCCAGTACTTTGGCCACCTGGTGTGAAGAGTC</p> |
| MSTRG.1284.17  | 0.19 | 0.03 | 0.0345  | -2.65 | down | <p>CTTAAAGCCTGAGCTCAGAGAGTTACCCGAAAAGTGATTTGA<br/> GTATTTATTGAACTGAAAGAACAATTACCTACTTCAGGCCG<br/> TGGGAAGCGTATGGAAATTATATTAGAACTTCAGCAAAGTGC<br/> ACAGCCGCATAATACAGAAGCCGAGACTCAGATTGACAGGCA<br/> AATAAGCCAGCTCGTGAAGGGGCTCTGGGTGGCAGCTCTG<br/> GGCTATTGGGTGTTGGACAACCATAGGCAAACCTGAAATGGAA<br/> CAGGGGCAGAAAATAGCACACTTTAACGCTGCGCAACCGTTG<br/> CTTTCTCATGGTCATTAGGAATTTTGTGGGATAATCCTCCA<br/> AATGAATTAGAAGCATTCTATTCAAATGGTTATTTATCATT<br/> AAATGGCATTGTAAGTGATGACTCAGAAGTTAACAGAGTTT<br/> GTGGCCGCTTTTGGAGAAAGAAAACCTCTGATGTCAAGTTCTG<br/> AAAAGTGAAGAGAATGAAATACAGAATATGGAACACTATCAT<br/> CTATCATTCTGGAATTCCTTCTCCCTACAGTCTATGTGGTGT<br/> TTCTAGCATGCAGCTCCTTCTCTCCAGGCTTTTGCTTATGCT<br/> GACCTCTTTGTCTGGAGGCTTACTCTTACCCCAACTTTTC<br/> GTCAATTCCAATCCAGTTCATTCTTACCTGTCCTTGTAGAG<br/> CCAACCTAGTCCACACCCTCAACCTGACTCCAATGGGAGATG<br/> ATGACTTTAATACATGTCTGTAAATATCCTGTGCATTTTTCT<br/> ATTAAGCCTGCCAGACTCTTCTGTCCATGGGATTTCCCAGGC<br/> AAGGATACCGGAGTGGGTTGGCTTTCCCTTCTTCCAGGATC<br/> CTCCTGACCCACGGATTGTACTTGCATCTCCTGCATCGACAG<br/> GATATCCTTGAAGATTAGTCAGAGAGCCTTATGTGCCTCT<br/> AAAGGGAAAAACTTAAAGTGGATATGAGAAGTGAAGAAAGTG<br/> ATCATAGGAGAAAATCATCTCAGGTAATAACTAAAAATCAAAA<br/> GAGCAATTAATATTTAATATTTTTTAAAGAAAAATAATTTTG</p>             |

|                |      |      |         |       |      |                                                                                                                                                                                                                                                                                                                                                                                                                                                                                                                                                                                                                                                                                                                                                                                                                                                                                                                                                                                                                                                                                                                                                                                                                               |
|----------------|------|------|---------|-------|------|-------------------------------------------------------------------------------------------------------------------------------------------------------------------------------------------------------------------------------------------------------------------------------------------------------------------------------------------------------------------------------------------------------------------------------------------------------------------------------------------------------------------------------------------------------------------------------------------------------------------------------------------------------------------------------------------------------------------------------------------------------------------------------------------------------------------------------------------------------------------------------------------------------------------------------------------------------------------------------------------------------------------------------------------------------------------------------------------------------------------------------------------------------------------------------------------------------------------------------|
| MSTRG.157095.1 | 0.63 | 0.1  | 0.00675 | -2.7  | down | <p>CTTCCGGGTGTGTCAGCCGCCCTTCCCCACCGTCGCCGGCG<br/> GGAACCGCCCCGTCTTCTCCGCCAGCAGCTTCCGCCTGCCGCA<br/> GTACCGGCACGCGCTCTGGGGTCCCCCCCTTCCCAGGGATA<br/> GTGACCGGGCGAGCGCGCCTCGCGGTACCGAAGACATCTG<br/> AGCACGGGCCAGGGCTTCGGCACCAGAAGCGGGTTGTGATGG<br/> TGCTGGAGAAGACCCTTGAGAGTCCCTTGACAGCAAGATCA<br/> AACCAGTCAATCCTAAAGGAAATCAACCGTGAATATTAAGT<br/> GAAGGACTATGCTGAAGCTCCAATATTTGGCCACCTGATGT<br/> GAAGAGCTTACTCATTGGAAAAGACCTTGATGCTAGGAAAGA<br/> TTAAGGGCAGGAGGAAAGGGGGTAACAGAAGATGAGATAGT<br/> TGGATGGCATCACCAACTCAATGGACATGAGTTTGAGAACT<br/> CCAGGAGATGGTGAAGGACAGGGAAGCCTGGCATACTGCAGT<br/> TCATAGAATTGCAAGTAGTCAGATACAGCTTAGCGACTGAAA<br/> ACAATGGTGACCTCCAAGAGGGCTCACACTAAGGGGCACTT<br/> CCTGGGACTGCTGCTGCTAGTGCCCCATCCCTGCAGCGAGC<br/> CACTGCTGACCCAGACTCCGAGGAGTTCATCGAACACTAG<br/> ATGGTTGGTCTGGTTCAGTCTCCTGTGGGGTCACTGCTCCTT<br/> TCCTCTCAGTCTGGCGCACACAAGATTTGTTTGTGCCCTC<br/> CAAGTGTGAAGTCTCTATTTCTCTCAGTCTATGGAAGTCT<br/> GCAATCAAATCCTGTTGGCCTTACAGTCAGAATCCCTGGGG<br/> ATTCTAGTCCCTTTGCTGGATCCCCAGGCTAGGACACTCAG<br/> AACCATCACAAGAGTGGGAGAACTTCTTTGATATTAGTGTTC<br/> TCCAGTTTGTGGGTGCTGCTAGGCGGGTATGGGATTTAAC<br/> TTTATCGTGATTGTGCCCTCCCCCACCATCTCGTTGTAGCT<br/> TCTCCTTTGTCTTTAGATGTGGGATATCTTTTTTTGGTGGGT</p>  |
| MSTRG.90432.3  | 0.13 | 0.02 | 0.02659 | -2.72 | down | <p>CTGCAGCTCAGTCTTTTGTAGTCAAACCAATTCCTACCCTCT<br/> CTGCAGAAGTTGATGATGCACAAGATTATCACAGGCAGTCTG<br/> TCTTCCAGCGACAACCAGCCATGGGCAGCCTTCTACCTGGTG<br/> GGACAGATTTCAAGGCCTGCTGTTCTGCTAAATGCTGAAACA<br/> GCGTCTGGGGTGCCACCCGTTTCAGCGCACTCTGTGACATGG<br/> TGACAGCGTCTCCTCGTCTGCAGAACTTTCCTCAAGAACGGA<br/> CCAAGGACAAGGGCGGACAGAGCTTGAAAGACGTGAACGCTG<br/> TACCCCTCCAGGAGGAATCTCCATAATTCTCCAGTTCTAGG<br/> GAACAACAGAGTCACCTACTGACACAGTGGGTGTTTTGGTCA<br/> ATTTTTGTCCCTCCAGCGAAAAATTCATGTGTCAGAAGTCCA<br/> GTGGTTAAGATTCCCACTTCTAATGCAGGAGGCATGGGTCC<br/> GATCCCTGATTGGGGTGTGCAGGTGAGTGGGTGGGTTGGTTG<br/> GTGGGTAGATGGGTCAGATGGGGGTGGGGGATTGGATTAGT<br/> GGGTAATAGGGTGGGTGGTGGGTAATACATGGATGGATGG<br/> CTAGAGACAGAGAGATACAGATAGATACCCAAAACCTCAGGTT<br/> ACAAAGGAAGGAAAGGGGATTAAGAAAGGAAAGACCCCTA<br/> AGTCAAGCTTGACAGTCATCACAGAGAACAAAATAAAGGCAG<br/> AAGGAGTGTCCCCTACCAAGATCAGTGAACCCCTGCTTT<br/> ATTTCTAGGTCCCAACAGAATTGCTATAACCCACGAAGCCC<br/> AAATCAGTTCTAAGTAGGAGGGGAAGTGGGAGGCTGTGGGG<br/> ATTGGGTCATGTGCCTTTTTCTGGAAGAAGGAGTGTACCC<br/> TGGAGCCTAGCACCCCTCCGAGAGGTCTGCTGACCAGCCGA<br/> GGGCAGCCGCTTGCTGGGGACGTCGCTGGAACACCAC<br/> TGGCCGGTTGCCGTGGGTTCCAGGAGTCCGAGTGCACAGAGGT<br/> TGCCTTGGGGATGCTGGAAGAGGCAGCATTCTGCCAGCCC</p> |

|                |      |      |         |       |      |                                                                                                                                                                                                                                                                                                                                                                                                                                                                                                                                                                                                                                                                                                                                                                                                                                                                                                                                                                                                                                                                                                                                                                                                                                       |
|----------------|------|------|---------|-------|------|---------------------------------------------------------------------------------------------------------------------------------------------------------------------------------------------------------------------------------------------------------------------------------------------------------------------------------------------------------------------------------------------------------------------------------------------------------------------------------------------------------------------------------------------------------------------------------------------------------------------------------------------------------------------------------------------------------------------------------------------------------------------------------------------------------------------------------------------------------------------------------------------------------------------------------------------------------------------------------------------------------------------------------------------------------------------------------------------------------------------------------------------------------------------------------------------------------------------------------------|
| MSTRG.92495.1  | 0.3  | 0.04 | 0.01559 | -2.8  | down | <p>CAGCTATATGAGGCAAGAGGACAATTCTAGTGACAGTATTT<br/> CATTGTGGCCAGAAGCAGAAGTCCCAGGTATCTTTTTACAAA<br/> AGGTCCCAGAAGCTACAGCCTGGGTTTTATCAAACAAACCA<br/> GTCAAAAGTGGGCCAAAACCTAAATGGACATGGATCCCAAA<br/> GAAGACATATAGAACCACAAAAGCACATGAAAAGATATTCAA<br/> CATCACTAATTACTAGAGAAAATGCAAATCAAAACTACAATAA<br/> TGGTTGCCTCACGCCAGTGAGAATGGCCATCATCAAAAATTG<br/> TACAAGCAGTAAATGCTAGAGAGGGTGTGGAGAAAAGTGAAC<br/> GCTCTTATGCTGTTGATGGTAATGTAATTTGGTACAATCATA<br/> GTAGAGAATATCATGGAGTTTCCTTACAAAACAAAAATAGA<br/> ACTACCCTATGATCCAGCAGTCTACTCTTGGGCATATATTC<br/> AGAGAAAATATGATTCAAAAATATACATGTACCCCAATGTT<br/> TATTGCAGCATTATTTACAATAGCCAAGACATGGATGCAACC<br/> TAAACGTCCATTGACAGAGGAATGGGTAAGGAAGATGTGGCA<br/> CATACATACAATGGGATATTACCCGGCCATAAAAGGAATGAC<br/> ATAATGCCATCTTCAGCAACATGCCTGGACCTAGAGATACCA<br/> TATTAAGTGAAGTAAGTCATATGGAGAAAGACAAATATCATG<br/> TGATTGGTGAATCTAAAGAGAACGATATGAATGAACTTATT<br/> TACAAAACAGAAAAGACTGACAGGCTTAGGAAACAATTTAT<br/> GTTTACCAAAGGAGGAAAAGTGAGGAAGAGGGATAATTTAGGA<br/> ATTTGGGTTAACACAGACACACTACTATATATAAAATAGATA<br/> ATTACCAAGGACCTACTGTATAGAATAGTGAACTCCATTGAG<br/> TACTCTGTATTGACCTACAAGGAAAAGACTGAAAAGAATG<br/> GGTGTGTGTATATATATAACTGAAATTACTTTGCTGTA<br/> CACGTGAAACTAACACAGCACCGTGAATCAACTATGCACGTG</p> |
| MSTRG.163926.5 | 0.14 | 0.02 | 0.01598 | -2.81 | down | <p>AGAGGATCAAAAATGCTATAAAGTTATCCTCTGAAAATATCA<br/> ATAAAATGTTTATCTACTAATCAATGAAATGAATCAAGAAA<br/> AATCCTACCAACAACTAATAACAGCAAAAATAATAGTGATGTC<br/> TCTTCAGATCATAAAATCAGAGGGTGTGTTTGACAATAAATTT<br/> GAAATTTTAGATGAAAATAGGCAAAACCTCTATAAAAATATAA<br/> CTTATTAAACTGATGTAAGAAAAGTTTTAGTCTGAATAAA<br/> TCTATAATATTAGAAAAAAATGTTTTAATGCCTCTGAGCT<br/> GCTGATGCTTTGTGGAGGGTGTGTCATCCAGGGGACAGAC<br/> CGCCAGGGCGTGATCACCGTAATTGTTACAGAAAATCCTG<br/> TGCTCCACGGAATGCTAATTCTCTGCACTCCTGGCTTAAATC<br/> CTGCCGTTGACAATAATCTTTTTGAATTGCTATTGAGGGAA<br/> AGCAATTTAAGCCAGAAAACAAGAGTAACCTTTCTTCCAAC<br/> CCCTTGCCAAGCAGGCTGTCCATTCTCGTGGTTAATTTTCCT<br/> TTACAGTGTGTTTTAAACAACCTGTCATTTAAAGTGAAAAAA<br/> AGTAAAAATTGGAAGGAAGGAAGAACTGGGGGAAGAAAAGCA<br/> GTGCTGGGGTGGTGAGTGTGACAAGTGAAGTGAGGGTGG<br/> TGGGTGTGGCAGGTGTGGAGTGTGCTTCTGACCAGAGCCTT<br/> TCCATACCCATCTCTGCAGGATAAGGTGGAGCAGACACCTCC<br/> TCAGCGTCTGGGGAGCTGGCAGGACCTGGCTTCCAGCGCC<br/> GCCCCACCGGCTGGCGAGCCACCAAGGTAAGGATGAGCCGAG<br/> CGCTCCCCTGACCCAGGCTGTGATTCCCGTTATATTGTGCAG<br/> CGGTGCTCAGCATCGCAGTCTTAGGAATCCATTCTGGCACT<br/> GACGTAAGAAGTTGCTGGTCTCAGCTCCACTTTACCCCTTTA<br/> AGGAAAACACATTTTGTAAAAGAGAGGTAAGTGGTTATATGT<br/> TCATAGAGTTTTCTTCAATGAGCCGACTCCAGTGATTGAAA</p>     |

|               |      |      |         |       |      |                                                                                                                                                                                                                                                                                                                                                                                                                                                                                                                                                                                                                                                                                                                                                                                                                                                                                                                                                                                                                                                                                                                                                                                                                                     |
|---------------|------|------|---------|-------|------|-------------------------------------------------------------------------------------------------------------------------------------------------------------------------------------------------------------------------------------------------------------------------------------------------------------------------------------------------------------------------------------------------------------------------------------------------------------------------------------------------------------------------------------------------------------------------------------------------------------------------------------------------------------------------------------------------------------------------------------------------------------------------------------------------------------------------------------------------------------------------------------------------------------------------------------------------------------------------------------------------------------------------------------------------------------------------------------------------------------------------------------------------------------------------------------------------------------------------------------|
| MSTRG.84611.2 | 1.7  | 0.21 | 0.04659 | -2.84 | down | <p>TGAGTACACGGAGAGTTGGTGGGAAGAGGATCTTAAAAGCCA<br/> AAGTCATACAGCTGCACAGAAGGGGAGAGGCAGAAAAGTGA<br/> GTTACAGAGGAGCTTCTAATTTCTCAAAGGCTGACATCCTA<br/> ACACAATAATCCATGCTGATCAACCAAACATTTCTAAAGTA<br/> TGAAGGATTTTTTTTTTTGGCTGCTGTCTGATCCCTGAACAGA<br/> AATCGTACTGGGGCCTCCTGCAGTGGAAAGCTCGGAGTCTTAA<br/> CCATAGGACCACCAGGGAAGACCAGGTCATTACAGAGTACTG<br/> AGAAGAGTTTCTGTGCTATAACAATCCACATGTAAGTGTG<br/> GATTTCTTACACTGTTTACAATACAGCCAGGTTGCAGTTTTC<br/> TTGATGGTGGATTCTTACCCTGTGCCAAGTGGGAAGCCCT<br/> GGCTGCATTAGGGGAAAAGTGAAAGTGAAAGTGAAGTCGCTC<br/> AGTCATGTCCAACCTTTGCAACCCCATGGATTGTAGCCAC<br/> CAGGCTCCTCCATCCATGGGCTTCTCCAGGCAAGAGTACTGG<br/> AGTGGGTTGCCATTTCTTCTCCAGGGATCTTCCCAGCCCA<br/> GGGATCGAACCCAGGTCCTGCATTGTAGGTACACACTTTA<br/> CCATCTGAGCCACCAGGGAAGTCTTTAGCGGGAGTTTCTAA<br/> AAAGACAACATGACAAGAAGACATCTTTGGGACCAGTTCTTA<br/> GAATTTGAAAACATGTTGATATTCTGGTCTAATGCAAAAC<br/> CTGTTTCACATAGCTCTAAGAGGTATAAAGAAGCTCTCCAAG<br/> GCATGGAGGATCAAGGATTCATCAACTCCTGTTGCTGTCTAC<br/> ATCAATCTCAGATTCAACAAGAATTCAGTGGCTTTTGATCAA<br/> GGCCCCATTACTCATGCTCTGAGTTTTGAGAGCTTTTGGGTC<br/> CTCCTAAAAACCCAGTGGGGGCTTCTATGCTTGGCACTCCT<br/> TAAGCTCTTCAACTGTTACAGTAAAGGACTCAATAACCTCAA<br/> GGCTACTCAACTGTTAACTGAGTGAAAGTGCCAACCTCTTAG</p>  |
| MSTRG.90432.6 | 0.14 | 0.02 | 0.03721 | -2.86 | down | <p>TTTTGAGTCAAACCAATTCCTACCCTCTCTGCAGAAGTTGA<br/> TGATGCACAAGATTATCACAGGCAGTCTGTCTTCCAGCGACA<br/> ACCAGCCATGGGCAGCCTTCTACCTGGTGGGACAGATTTCAA<br/> GGCCTGCTGTTCTGCTAAATGCTGAAACAGCGTCTGGGGTGC<br/> CCACCCGTTTCAGCGCACTCTGTGACATGGTGACAGCGTCTCC<br/> TCGTCTGCAGAACTTCTCAAGAACGGACCAAGGACAAGGG<br/> CGGACAGAGCTTGAAAGACGTGAACGCTGTACCCCTCCAGGA<br/> GGAATCTCCATAATTTCTCCAGTTCTAGGGAACAACAGAGTC<br/> ACCTACTGACACAGTGGGTGTTTTGGTCAATTTTTGTCCCTC<br/> CAGCGAAAAATTCATGTGTCAGAAGTCCAGTGGTTAAGATTC<br/> CCCATTCTAATGCAGGAGGCATGGGTCGGATCCCTGATTGG<br/> GGTGTGCAGGTCCCAACAGAATTGCTATAACCCACGAAGCC<br/> CAAATCAGTTCCTAAGTAGGAGGGGAAGTGGGAGGCTGTGGG<br/> GATTGGGTCATGTGCCTTTTTCTGGAAGAAGGGAGTGTACC<br/> CTGGAGCCTAGCACCTCCGGAGAGGTCCTGCTGACCAGCCG<br/> AGGGCAGCCGCTTGCTGGGGACGTCGCTGGAACCACCA<br/> CTGGCCGTTGCCGTGGGTTTCAGGAGTCCGAGTGCACAGAGG<br/> TTGCCTTGGGGATGCTGGAAGAGGCAGCATTCTGGCCAGCC<br/> CAGGTGAGCAGAGAATACTAGCGGAATAAAGAGCAGACTCGC<br/> CAGGCCACGGGAGAGGGCTGAAAATTAATCAGCAGCTGC<br/> TCTATTTGTCTGTAAGAGGAGCAGTCGGTCTCCACCAGCTCC<br/> CACCCGCGGATGGCTGGGATAAAGGGAGTGGGGTGGGAAAG<br/> TCCTTACTGCAGCCTCATCAGATCCAGTAACTCATGCTTGA<br/> GTAAGTCAAGAGCTTACTGGGATGACGTGGGTAAGTGCAGACG<br/> TGGAGGTTTCATGTTATGATGAGCCTGGGAGTGAAGTGAAGAG</p> |



|                |      |      |         |      |      |                                                                                                                                                                                                                                                                                                                                                                                                                                                                                                                                                                                                                                                                                                                                                                                                                                                                                                                                                                                                                                                                                                                                                                                                                                               |
|----------------|------|------|---------|------|------|-----------------------------------------------------------------------------------------------------------------------------------------------------------------------------------------------------------------------------------------------------------------------------------------------------------------------------------------------------------------------------------------------------------------------------------------------------------------------------------------------------------------------------------------------------------------------------------------------------------------------------------------------------------------------------------------------------------------------------------------------------------------------------------------------------------------------------------------------------------------------------------------------------------------------------------------------------------------------------------------------------------------------------------------------------------------------------------------------------------------------------------------------------------------------------------------------------------------------------------------------|
| MSTRG.156627.7 | 0.91 | 0.13 | 0.02554 | -2.9 | down | <p>GTCATCACATGGTGGAGGCAGAGAGCTCTGGGGTCTCTTCCT<br/> CTTCTTATAAGAGCACCAGCCCTATCAGATTAGAGCTCTACC<br/> CTTATGCCCTCATTTAACCTTTATCACTCCTCACAGGGTCTG<br/> TCTCTAAATACAGTCACACTGGGTGCTGAGCCTTCAACATAT<br/> GAATTTTTGGGAGAACACCAACATCCAATTCATAACACCATT<br/> AAAAAGGAGGAGAAAATATTTTTATTGGGTCAATTTCCCTGG<br/> GGCTGAATCTATTAGATCTACACAGGAGAGCATTGAGAGAGC<br/> TAATTGGAAAGATTGCTAAGCTTGCTGCAAGAAGCCAGAGAG<br/> GGGCATTTTATTTCTCACTTGGATGCTTGCTGAGCCGCAGAA<br/> CACAGTACCCTGACTGCCTCTGGACTTGAGTGCATGAAGCAA<br/> GCATCCGTGTCTGGGAGACCCAGTGA AAAATGAACTTTAGGGC<br/> AACTACTGGCTGTCAGCAGGCAAGAAACGGAGGCCCCAGTC<br/> CAGCAGGACAGAGATCGCTGACTCCTGCTAGCAAGCATATGA<br/> AGCTGGGAGCAGATCCCTCTCCAGTTGAGCTTTCAGATGAGA<br/> TGCTGGAAACCTCGATTGAAGCTTCATGAGAGACCCGAAGC<br/> AGAGGACCTGGTGAGCTATAACCAGGTTGTGCGAGATGGTAC<br/> ATGTGTGTTGTTGTTAGCCACTAAATGTGTGCTAATTTGTTA<br/> TACACAATAGGTAACGAATATGCAGTTTTGTGTTTTGCTTA<br/> CATCACTCCCCTCTTCACAGGACTGCAGTATAAGTCCCTGGA<br/> GATTGTTCTCAGAAATAAATAACTGACAATCACCCTCTG<br/> TGCTCAGAATTGTCCTTCTCCTTCCACCAAAGGTCTGTTACC<br/> TGATCAGCTTTGTTGTGCTTGATTTCTCTGGGAAAAGTTCTC<br/> TCTCAGGTGACCTTAGCTCCTCACACAAAGGGAGCTTTGTGG<br/> GGCCTGCCTATGTGGTTCCCCAGATAAGCCTGAATACTCTTA<br/> AATCCAGCAATGGTGCAGCTTGGCCATAAGCTAAGAGCTCAC</p> |
| MSTRG.168210.5 | 0.39 | 0.04 | 0.01912 | -2.9 | down | <p>TGGCACTATAAAAACGGCTCTACAAAACCAAAACACTTCTTGT<br/> AATTTTATTGCAGATCACTATCTTGCTCCTCACCTTCATCTT<br/> TTTGTGACCTCACTTCCCTCTTGACTTTGAGGAACTAGCA<br/> GCTAGCAGATTGCTGTTCTACTTCTGATACCTTCAGGGGTCC<br/> ACTATTCATCTTGCCTCCCATCACCTCCTGTGCATAATTCAT<br/> GGAAACTATTTGTTCTGCTGTGTTCCGGCCACACTACACTGG<br/> AGAAACTCACTGTCCTTTTATTACCATGCTGTGAAGAAGC<br/> CTAAAGTAGCCTACTGTAGATGAAAGTCTATCCATGATGGGA<br/> GAGTAGAGGTTACCCACTGACAACCAGAACCATGTTCCAGAG<br/> GCCATCTGGGACCTACAGATTAGAGTACATCATGCAGAATA<br/> CCAGGCTGGATAAATACAAGCTGGAATCAAGTTTGCCGGGA<br/> GATATATCAATAACCTCGGATATTCAGATGACACCACCTTTA<br/> TGGCAGAAAGTGAAGAGGAACTAAAGAGCCTCTTGATGAAAG<br/> TGAAAGAGGAGAGTGAAAAAGTTGGCTTAAAACCAACATTC<br/> AGAAACTAAGTTCATGGCATCCGGTCCCATCACTTCATTGCA<br/> AATAGACGGGGAAATAATGGAAACTGTGAGAGACTTTGTTTT<br/> GGGGGGCTCAAAGTCACTGCAGATGGTGATTGCAGTTATGA<br/> AATTAAGGATGCTTGCTCCTTGAAGAAAAGCAATAACCAA<br/> CCTAGACAGCATATTA AAAAGCAGAGACATTACTTTGCCAAC<br/> AAAAGTCCATCTAGTTAAAGTTATGGTTTTTCCAGTAGTCAT<br/> GTATGGATGTGAGAGTTGAACCATGAAGAAATCTGAGCGCCG<br/> AAGAATTGGTGCTTTTGAAGTGCAGTGTGGAGAGGACTCCT<br/> GAGAGTCCCTTGGACTGCAAGGAGATTCAACCAGTCCATCCT<br/> AAAGGAAATAAGTCCCTGAATATTCATTGGGAGGACTGATGCC<br/> AAAGCTGAAGCTCCAAATTTTTGGCCACCCGATGAAAACAAC</p>     |

|                |      |      |         |       |      |                                                                                                                                                                                                                                                                                                                                                                                                                                                                                                                                                                                                                                                                                                                                                                                                                                                                                                                                                                                                                                                                                                                                                                                                                                                    |
|----------------|------|------|---------|-------|------|----------------------------------------------------------------------------------------------------------------------------------------------------------------------------------------------------------------------------------------------------------------------------------------------------------------------------------------------------------------------------------------------------------------------------------------------------------------------------------------------------------------------------------------------------------------------------------------------------------------------------------------------------------------------------------------------------------------------------------------------------------------------------------------------------------------------------------------------------------------------------------------------------------------------------------------------------------------------------------------------------------------------------------------------------------------------------------------------------------------------------------------------------------------------------------------------------------------------------------------------------|
| MSTRG.215732.3 | 0.21 | 0.02 | 0.00678 | -2.9  | down | <p>CAGGAAGAGAAGGGGACGACAGAGGATGAGATGGCTGGATGG<br/> CATCACCGACTCAACGGACGTGAGTTTGTAGTGAAGTCCAGGA<br/> GTTGGTGAAGGACAAGGAAGACTGGCGTGTGCAGTCCATGG<br/> GGTTGCAGAGATTCAGACATGACTGAGTACTGAACCGAAGT<br/> GAATTAGTGGATATTTCCCTCGGTAGAATATTATGCATCCAGT<br/> AAAAGCCACAAAGACTACTTCAAGGCATGGCAGAATGTGTCT<br/> GCATAAATCCTGATTTTTTTGAGGGTCCACGTGACTTGAGAG<br/> CTTCAGGGTAATGGAGCAACAGCTGTCAGACAATTTTGCATG<br/> TTTTATACAGCTCATAGCATGTGGCAGGGGAGACTGAGAAAAG<br/> GGGTCAAGGGGGTCTTTGAGAAGGGAAAGCTTTTTTTTTTTT<br/> TTTGGCCTGGATTTTCACTGGTTTGTATTAAAGACTGAGGGC<br/> AGGAGGAGAAGAGCGACGGAAGATGAGATGGTTAGATGGCAC<br/> CAATGACTCAATGGACGTGAGTTTGTAGCAACTCCAGGAGGTA<br/> ATGAAGGGCAGGGAAGCCTGGCTGCTGCAGTCTGTGGGGCTG<br/> CAGAGAGTTAGATGTAAGTTAGCAACTGAACAAGAGTTCATT<br/> AGAAGTGCTTGTAGCCTGAGAGTTACATGAAGTCTACAGAGA<br/> TTCAAAAGTACCTAGGTTTGAATCCAGCTCCACCTCTTATTT<br/> AGGGGCTTCCCACGTGACTCAGTGGTAAAAGACTCCTCCTGC<br/> CAATGCAGAAAATGAAGGAGAAGCATGTTTCGATCCCTGGGTC<br/> CGGGAGGTCCCCTGGAGGTGAAAATGGCAATCACTCCAATTT<br/> TCTTGCCTGGAAAATCCCATGGACAGAGGAGCCTGGCTAGCT<br/> GTGGTCCAGCGGGTGGCAAAGAGTCAGACACAAGTGGGCACA<br/> CACACACACACACACACACACACACATCACCTTTTATTAG<br/> CCATGTGATTTCTGACTCTCAGTTACTACAGCTGTGAAATGG<br/> GAATGGTACCCTCTGTGACAGGGCGATTGAGAGAATGCCGTT</p> |
| MSTRG.98647.1  | 0.12 | 0.02 | 0.01163 | -2.93 | down | <p>TGGTCATGTATGGATGTGAGAGCTGGACTGTGAAGAAAGCTG<br/> AGCACCGAAGAATTGATGCTTTTGAAGTGAAGTTTGGAGAA<br/> GACTCTTGAGAGTCCCTGGACTGCATGGAGATCCAACAGT<br/> CCATTCTGAAGGAGATCAGCCCTGGGATTTCTTTGGAGGGAA<br/> TGATGCTGAAGCTGAAACTCCAGTACTTTGGCCACCCTTGGC<br/> AACTTTTCTATTAGAACTGTAACACATATTTGTTCCAAGTT<br/> CATTCCTTTCCCTTGCTACAATCTGTATCACAGACAATTGAT<br/> CTCTTCAAGGCTGTACCCTTTGCTCTGACATGGTTTGGAAAT<br/> GTGTCACATCAGTAATCAGACTCCAATCATCCCAGCTCTTCG<br/> ATGCTCTTGCTATTAGTGCATGTGCTCTTTGATCAAAAACATT<br/> AATCAGTTCTCTCAATTCATCAGCCAACCTGACCTTCCTT<br/> CCTTCTTCTCTAGAGTCAAGATTCTGTGATGCATTATCTAGT<br/> CCCGTGGTACTCAAATGCTCTGTGGCCAGCAGCATGGGCATT<br/> GTCTGGGAGCTTGTAGACATGCAGACTCTGAGGGCTCACCA<br/> GACTGGCATTTTAGAATCATCTTAACAAGATTCTAATGATT<br/> CGTATGCAGATAAGGTGGGATTCCCTGGTGATTTAGACGGTA<br/> AAGAATCTGCCTGCAATGTAGGAGACCCAGTTGGATCCCTG<br/> GATCTGGAAGTCCCCTGGAGAAGAAAATGGCTACCTACTCC<br/> AGTATGCTTCCCCTGGAGAATCCCATAGAGGAGCCTGGCAGGC<br/> TGCAGTCCATGGGGTCACAAAGATTTAGTACTAAAAATAAC<br/> AACTCTCTGAATTCAGTATTCCTAGTACTGAACTCAGTTATC<br/> TACAAATACAGATAGAAAACCATAGGTCATAGGAGAACTTGG<br/> ACACGCTTGAATTTGTGGAATAAGGGAAAAGACTAGTTGGAA<br/> GGTGAACAGGAATATTTAAAAATATTTCCCTTGAATCAGTTG<br/> TCTCTTCCCCATCTTCTTACCAGACTGAGTTGTCAGGGTG</p>             |

|               |      |      |         |       |      |                                                                                                                                                                                                                                                                                                                                                                                                                                                                                                                                                                                                                                                                                                                                                                                                                                                                                                                                                                                                                                                                                                                                                                                                                       |
|---------------|------|------|---------|-------|------|-----------------------------------------------------------------------------------------------------------------------------------------------------------------------------------------------------------------------------------------------------------------------------------------------------------------------------------------------------------------------------------------------------------------------------------------------------------------------------------------------------------------------------------------------------------------------------------------------------------------------------------------------------------------------------------------------------------------------------------------------------------------------------------------------------------------------------------------------------------------------------------------------------------------------------------------------------------------------------------------------------------------------------------------------------------------------------------------------------------------------------------------------------------------------------------------------------------------------|
| MSTRG.34779.2 | 0.16 | 0.02 | 0.01222 | -2.94 | down | <p>CAGAAATCAGCCCCCACTAGCGCCGCCGGGGCTTCCGCC<br/> CGAGGCCTGACGGTCGCCGTTCCGGTTCTAACCCCGC<br/> CCTCAGCGGTAACCCTCCAGAAGTCTTAATATCCGGGACCA<br/> GAGGCTGGCGCCAGCGCGCACTTCCGGCGACGACGCAGAGG<br/> AAAGAATCTGGTGACGTTCTTCCCTTCTACCGTGCCGCCA<br/> GGCTCCGGCTCTCGGTGCGGCAGCGCCATCTGGTGCTGAGTC<br/> TCTCGTGCCCGCAGAGGGGGCGCGCCCTTCTCCCGAAT<br/> CTTCCAGAGAAAATGTGGCCTGGGCTTTCGTCCTCGCCCTC<br/> GGAAAGGGAGAGACCCGAGCTTTCGCCCTGCCGAGTTCTCAC<br/> GCAGGAGGTACTTTGTAGGACTTCGCAGCGGAAGCGACTTGG<br/> ACACAGGAAGAAGACAACCTTTTATGAACGTGGAAGAGAGCC<br/> CTCACCAAGAACCAAGCTGCTGGTGCCTTGATCTTGGACTT<br/> CCAGCGTTCAGAACTATGCTGCCAGTGAGACTGATCCTCAA<br/> TCATAGCTTGAGAAGCAAGATTCTAAAGCTGTGCTTCCCAGT<br/> ATGGAAACCTTTAACTACATATGGCTGTCAAGCATTTGCAGT<br/> GTGCTAGTCTGAAGTGATCACTTTCGCGTGTGTGCTCAGT<br/> CATGTCCGACTGTTTGCAGCCGATGTACTAAAGACCCCCAG<br/> GCTCCTCTGTCCATGGAATTTTCCAGGCAGATTCTTTACCAC<br/> TGAGCCATCAGGGAAAACCCAGTCTGAACTGAGATATGCAGCA<br/> AATGTACACACTGGATTTTGAAGACTTAGTCTAAAACAATGG<br/> TTAACTGCTGGCAGGCCCTCCAGCTGAGCTCCTCATCCTC<br/> CACTGTGCAGGGTTACTGAAGCAAGAGCAAGCTTCCCTCA<br/> GTCCCCGGAACAGGAGCCAAGTGTGACACAAATTGTGAACT<br/> TGTTTCTGGTTACCAGGAAAATTAAGAAATCCTAATCAAG<br/> CAAAAAATTGACAAAAATCTTTCCAACATTTGAACAAAAAAG</p> |
| MSTRG.546.1   | 0.9  | 0.12 | 0.00847 | -2.95 | down | <p>AGCTCAGAGAAGAGGCAGAGAGGGTTCTGACAGGTCAAATCT<br/> GGAGAATGTGAAGCCTGCAAGGCACATCATAATTGTAACACA<br/> ACTGCTTATTTTATACTCTGAAGTTTTTTCAGTTCCAAGTGAA<br/> ATCAATGGATAAATATTTTTTGAACCAAATATTTTTCAATG<br/> ACCATTTTAAAGAAATAGAATCATACTCATTTTGGGGGGTGT<br/> GGTCATAAAAAAGTTAAAGAACAACAGTGAAGAAAGGCGTTA<br/> ATCCTGTGGCAGAAAAGAACCCGATCTTCATTGTATCATGGG<br/> GGAGCTAACTGTGGTGGTGGACTCTTAAATTGTGGCTCATG<br/> GGCTTAGCTGCTCCACAGCATGTGGGATCCTAGTTCCCAGAG<br/> CCGGATGGAAGCTGAGTGCTCCGCATTGCAAGACAGCTTCT<br/> TAACCACTGAACACCTGAGAAGTCTCTGGATGGCAGTTTTTA<br/> AACAGCCACTCTGAAGATGGGGATTTTATTGTACCACTTTAC<br/> TTTTCCCTCCCTTCTGTCATAGAGTTAGGGAAGTCAACCAA<br/> ATCTGGCCTTCTGCTTGTGTTTTGTTAATAAAATTTCACTATA<br/> ACTTGTCCAATTGTTATGCTCAGTTTTTTGGGGTTTTGTGTA<br/> GTCTTGCTTTTGGAGCTATAGCTGTGAAATTAATAGTCTTGA<br/> CAGAGGCCATGTAGCCAATAAATAGTAAATATTTACTACT<br/> TGGCCTTCTTTCAGGAAATTTGTTGACTCCTGTTATTGTTAC<br/> TTTTATACTATTTATAATCTGCTTTGTAACCATAATTCACGT<br/> GCTTTCTGGTATCATTACATTTAAACGGATACAGAGCTCACC</p>                                                                                                                                                                                                                         |

|                |      |      |         |    |      |                                                                                                                                                                                                                                                                                                                                                                                                                                                                                                                                                                                                                                                                                                                                                                                                                                                                                                                                                                                                                                                                                                                                                                             |
|----------------|------|------|---------|----|------|-----------------------------------------------------------------------------------------------------------------------------------------------------------------------------------------------------------------------------------------------------------------------------------------------------------------------------------------------------------------------------------------------------------------------------------------------------------------------------------------------------------------------------------------------------------------------------------------------------------------------------------------------------------------------------------------------------------------------------------------------------------------------------------------------------------------------------------------------------------------------------------------------------------------------------------------------------------------------------------------------------------------------------------------------------------------------------------------------------------------------------------------------------------------------------|
| MSTRG.43210.11 | 0.48 | 0.05 | 0.00344 | -3 | down | GGTTGTCAAGCACTGAGCTCCTGTGCAACTCTGGGAGGATCA<br>CATCATTCCACTTACGGGGCCAGAACCATGCCCTAGGAAAAGA<br>GGAGAGAGCATTTCAGTCTTCACTCTGCATCAGGGTATGAAAC<br>TGTGCTCCCTGTAGATTACTTTGGGTCTGGGTCCCCTCCAG<br>TTTCTGTCTCTTTTCCAGCTTGGCAGAAGAGGTGAGACTCGG<br>CTGTCAAGATCACTGACTGTGCTGCTTTCCCTTTGTGGGTG<br>ACTGCAGTTGCAAGTTTCTCTGTACATTTTATTAGTTAAG<br>AGCTCTTCCCTGCTTCCAATAATACAGGACCCAGAGAAGTAT<br>TTGAAGTGAAGGTCCTGAAGATGAGATGACTGAAAATTAAT<br>GGAAGAGAATTGCTTTTCTACTGTGGGATACCTGCTTGGTGC<br>CAGGTTGCTAAGAGGGATGCTCTGGAATTCACCCATTGCT<br>ATAGAGGTTGGGTCCACCATATTGACTGTGCTCATGCCTAC<br>CAAAATGAATAGGAGATTGGCCAGGTCATTCAAAGCAAGCTT<br>GAAGATGGCACTGTGAAGAGAGAAGACATATTCTGCACTTCA                                                                                                                                                                                                                                                                                                                                                                                                                                                                                                                  |
| MSTRG.111347.2 | 0.39 | 0.05 | 0.00366 | -3 | down | TCTCAGCCCTGCTCATTCCCCTGTACTCTCTCTGGACCCT<br>TTGCTGCAGCATATCTTACTGTGAAGGCCACATGGGTTATGA<br>CAGACTCTGAGCTTTGATGATTCATAAACTCAGTTTTTAGAA<br>AATCTGGTCTGTTCTAACCACCTCAGAAAAAAAAAAAAAGAT<br>CAACAATAATGTCAGCTTATTCATATACAGTTTTGTCCATTT<br>CCTGTGCTTTCTCTTTGTTCCAGGACACCCATCTCTGAAT<br>TAGAACTCAAAGGAAGTTGGAGCAGTCATCAGAAGGTTGCTT<br>GACAAGCCCATCAATACAGCAAAGAAAAGTGAATTGTCATAA<br>ATGACATTTTATTCAGACCCATTTCTAACTCCTCTTCTTTT<br>CAGTGAACAGAATTCTCCCCCTTACCAGTGAATCTGAAGAT<br>CTGGGTTCAAGTGCAGACTCTGTTATTTATCATCACTGTGGT<br>CATTGACAAGGCATTTAGCCCCTTACGCTCTTGTAAATGG<br>TCATCACTGTTGGTTTTCTATCAAACTGCTTAAGGAGTAGC<br>TGTCTCTATGGATAGGAGAGAAGACTGTGCAAGAAGTAAAGG<br>GGAGCAAGAAGCTGTCACTATGCACTTCTGCACATGCCAGGA<br>GGGCCTTCAGAAGAGCTCTGGAACAGAAAGAAAGAGGGAGAA<br>GTAGAAATTTGAACAGCTCCTGCTGCAGAACTTACGATCTTT<br>TTGCCCCGAGGCCTTCTACTGAAGAGATCCAGATAAGGGT<br>GACCCATCAGAGAGGATCATCCATCTAGTTTACAGAAGCAAT<br>TTCAGAGTGGGCCCTGGGTCTTGGACCCCGATGGAGGAAAT<br>CCAGGTGTTGTCATGCTGGAGAGGATACTGGAATCGCTGA<br>AGACATTTTTCCATCAGCCTGAGAATGGAGCCAACGACTGAG<br>GATGGAGGAACATAAAAATGGAATCCTCACCAGACTGGGAAG<br>GCAAGGAGAAGCACACCCTGACTGTGGCCACACCTATGGGG<br>GCTATTGTTTCATGACAGCGCTTTGGCTCTTCCGCCATCCGT |

|                |      |      |         |       |      |                                                                                                                                                                                                                                                                                                                                                                                                                                                                                                                                                                                                                                                                                                                                                                                                                                                                                                                                                                                                                                                                                                                                                                                |
|----------------|------|------|---------|-------|------|--------------------------------------------------------------------------------------------------------------------------------------------------------------------------------------------------------------------------------------------------------------------------------------------------------------------------------------------------------------------------------------------------------------------------------------------------------------------------------------------------------------------------------------------------------------------------------------------------------------------------------------------------------------------------------------------------------------------------------------------------------------------------------------------------------------------------------------------------------------------------------------------------------------------------------------------------------------------------------------------------------------------------------------------------------------------------------------------------------------------------------------------------------------------------------|
| MSTRG.166870.1 | 0.29 | 0.03 | 0.0033  | -3.06 | down | AGCTTCCACACCGGCGGAGCTCCAGCTCTGCGCTCAGGCGCG<br>ATAGCAGAGCCCCGGCCGAGAGGCTGCTCTGTGCTGGGCGAG<br>CCTCCCCAAGCCCTGCCAGCTTCTAGCGTTCGCGCCCGTGA<br>AGGAGCAGGCTGCGGGAGTGTGGGAGACGTGAGTGGTGCCTG<br>ACTGGTGCCTCAGCTCAGCTCTCGCCTTCCCTTCGGACCTAG<br>GAGCCAGGCGTCCTTGCAGAGGGCTTAGGGCTGGGGGTGTG<br>CACACTGCCAAAGCCTCCCGCGGGGAGAGCTCTTCCGAGGG<br>AAAGGAAGCGCCCCAGGCTGCATTCCCAAGCTGGGGCTTCCC<br>CGCCCAGACTAAGCGCCGCACGGAGGGAATCAGGGTCCCGGG<br>GCCCTGGCTTGGGGAGGCAGCTCCACAGCCAGAGTGTGCT<br>CCGTTTGTGCCAGAAAAGCGCCTGCCAGACGGGCCTTCCCT<br>GGAGCTGTCTGCCGCTAGAGGCAGGTGGATGTGCTGTGCG<br>GGCTTCCCCTGTGCGTTTGGGCTCCCTAGCACAGCCGCAGCG<br>CAGGGGAACCAGCCCATGATCAGTGAGCTCCGGGCAGTACTT<br>TGGTCCCAGGTTTGGAGCCCTATGCCCCGAACGCGGGAGAGA<br>AGAGGCTGGCTGCCGGCGGGTGTGCAAGCCTGTACTGGGA<br>AGGACCGAGTGAGCTTCCACACCGGCGGAGCTCCAGCTCTGC<br>GCCAGGCGCGATAGCACAGAGCCCCGGCCGAGAGGCTGCTC<br>TGTGCTGGGCGAGCCTCCCCAAGCCCTGCCAGCTTCTAGCG<br>TTCGCGCCCGGAAGGAGCAGGCTGCGGGAGTGTGGGAGCCG<br>TGAGTGGTGCCTGACTGGTGCCTCAGCTCAGCTCTCGCCTTC<br>CCTTCGGACCTAGGAGCCAGGCGTCCTTGCAGAGGGCTTAGG                                                                                                                                            |
| MSTRG.194482.7 | 0.18 | 0.01 | 0.00526 | -3.12 | down | CAGCTCTTTAGCCTGGCTGTCAAAGTTTGATAACCAGCTTCA<br>CGTCCTTCTCCGTGCAGCTCTGTGTGGTCACGGCAAAGTAT<br>GAGGGCCAGAGCCACTGACAAGTTTACAAGCTGATCGACTGC<br>AGGGTTAGTGGCGCAATCGCGAGACAGGGACGCAGGTGATGC<br>TCCTGCTGTGTTAGGTAGGTAGATAGGTAGCGGTGACGTAC<br>GTGTTACGTGTGAGATGAGTCTTGTTCCTTGCTGTGTGTG<br>GTGTGACCCTGCAGCTGCCGCGCTGGCCGTTCTGTAAAAG<br>CACGCACCGTCTTCAGGCTCTCAGCCGCACCGTGGTTTACGC<br>AGAACGGCGGCCTTCTCTGACTGCACTCCGCATCCCTGTGAT<br>GTGATGCTCGTCCCCATTCAATCCTGGCACCAAGCTGTCCCC<br>ACGCTGGAGCGGGCCTCTGGACCTGCCCCCGGTGTAGTCCT<br>CTGAGAGGAGCTCAAAACCGCAGGCGGGTCCAGTCATGTCAG<br>AACCTCGTACGCCGCTGGTTTGGTGGCACTGTGAAGCGGCG<br>TGAGCCGTGGCTCACTCCTCCAGGGGACCTGCTCTGGAATG<br>GGCTTCGTGGTGCAGGTCCAAGCTGAAACTGCCTTTGCTA<br>CACTCTTCATTGCGACATGCAGACAGCATGGGATTCTCTGGT<br>ACTCGTTGTTCTCTGTGACATTTGCAATTCGCTCCGAGTGCA<br>GCTGGTCCCAGGGCCGTAGAGAGGATGGTGTGCTGTGACTCGGC<br>GATGGCCACTGGACGTCCCCAGTGGGCGTGTCTCACACGTGA<br>TGTCAGCCTGAGCTGCTGTGGACAAGGGCATGTGCTGCTGTG<br>GTTAAGTGGGCTGGACCCCTTTCCCCCTTTCGAGAACATA<br>AAACCGAAAGTTGAACTGTGCCAGTGATTGTTTCTTGAATCC<br>TCAAGTTTACTTGGTTTTGTTTTCTCTCCGTAGAGTTAGAGC<br>TTTTCGTATCGTTTGGTTTTGTCTTTAATAATTATATTCTG<br>TTTCATTTTTATTGAGCTAGTTAAAAGTGAATCAAAGCTAGT |

|                |      |      |         |       |      |                                                                                                                                                                                                                                                                                                                                                                                                                                                                                                                                                                                                                                                                                                                                                                                                                                                                                                                                                                                                                                                                                                                                                                         |
|----------------|------|------|---------|-------|------|-------------------------------------------------------------------------------------------------------------------------------------------------------------------------------------------------------------------------------------------------------------------------------------------------------------------------------------------------------------------------------------------------------------------------------------------------------------------------------------------------------------------------------------------------------------------------------------------------------------------------------------------------------------------------------------------------------------------------------------------------------------------------------------------------------------------------------------------------------------------------------------------------------------------------------------------------------------------------------------------------------------------------------------------------------------------------------------------------------------------------------------------------------------------------|
| MSTRG.171301.2 | 0.27 | 0.03 | 0.00379 | -3.21 | down | GAAAGATTAAGGTAAGGAGGAGAGGGTGGCAGAGGAGGA<br>GATGATTAGATAGCATCACCAACTCATTAGACATGAATTTGA<br>GCAAATTCTGGGAGACAGTGAAGGACAGGGAAGCCTGGCATG<br>CTGCAGTCCATGGGGCACAAGAGTCGGGACACTTCTTAGCAA<br>CTGAACAACAACAGCAACCTATATTTACATAACCTGAAAGG<br>TAAAATAAAAATGTCAGACATGACTTAGTGTCTAAACAACAG<br>CAACTTACACTGTCTCAAAATATCCTATACCTTTTTATGATT<br>CTTTAGTAGTTTCTCGATGTTATTATGTGATTATATGTTTCT<br>CTCCTATCTGGTTGTAAGTCACTGATGATGTTGTGCTA<br>ACACATTCTAAGTACTAGTTTTTATCTGCTTAGTAAATGAAT<br>TAAAATTGAGAAAATAAGGCTGTCTGTGACTAGATTAAGTT<br>ATGCTCTGAAATAGTGTCTAGAAGCCATGTTGATCATAACAG<br>AGGACATTTTATTAATTTGACTCTCTTTGATGGTTGGTTTA<br>TTTGTTGCATTTTGAACCTTTGTTTTCTCTGAGTCAGGTCCT<br>TTATATGTTGGATAAAGATGCTAGTATCTACCTGACAGAGTT<br>ATGGTAACCATTAATGGGATAAATACCGAATCTTATAAT<br>ACAGCACTTTCCACATAATTGATGCTCAGTAAGTACAAGAA<br>GATCCAACCAGTCCATCCTAAAGGAGATCAGTCTGAATATT<br>CACTGGAAGGACTGGTGTGAAGCTGAACTCCAATCCTTTG<br>GCCACCTGATGCGAAGAGCTGACTCATTGAAAAGACCCTGA<br>TGCTGGGAAAGATTGAAGGCAGGAGGAGAAGGGGACGACAGA<br>GGATGAGATGGTTGGATGGCATCACCGACTCAATGGACATGG<br>GTTTGGGTAACCTCCGGGAGTTGGTGATGGACAGGGAGGTCT<br>GGCATGCTGCGTTTCATGGGGTTGCAAAGAGTCAGACACAAC<br>TGAGCAACTAACTGAACTGAAGTGTTAAGCTGATAATAAGC |
| MSTRG.226977.2 | 0.65 | 0.07 | 0.01421 | -3.25 | down | AGAGTATGTTTGTTCACCTTAGATACATGGGGAAAAGAATC<br>ATAGCAAGGGTGCATGATGCCTGGCTGTCAAAACACTTTGGA<br>GTAGACCGAAAATCACAACCATGCCAGCTCTCCGAAACAGA<br>TCAGGAATAATGCAGGCCCGGCTTACAGCATCTTAGTAGCCTG<br>GAAAGTTCATTTACACTTAATCACAGTTCTACAACAACCTGAA<br>GCAAACATTTTCCATCAGGCACTTCTTGAAGGAAATACTGCT<br>ATGGAAGTTTCCCTAACAGTATAGATACCATATCATTTTTCA<br>CTCAGTGTTCAGGAGTCCATATGGGATGAAGAAGCACTGT<br>GGGAAGAGTCCATTGGTAGCCAGCACGTTTTGGGTCTGCTTG<br>ATAATCGAGTCCAAGCTCACTCTGCTTGCCACAAGACAGGTC<br>AGTGAATCTGAAAAATGATGTGTTGAGGCAAGGAAAATACTT                                                                                                                                                                                                                                                                                                                                                                                                                                                                                                                                                                                                                                                    |

|                |      |      |         |       |      |                                                                                                                                                                                                                                                                                                                                                                                                                                                                                                                                                                                                                                                                                                                                                                                                                                                                                                                                                                                                                                                                                                                                                                             |
|----------------|------|------|---------|-------|------|-----------------------------------------------------------------------------------------------------------------------------------------------------------------------------------------------------------------------------------------------------------------------------------------------------------------------------------------------------------------------------------------------------------------------------------------------------------------------------------------------------------------------------------------------------------------------------------------------------------------------------------------------------------------------------------------------------------------------------------------------------------------------------------------------------------------------------------------------------------------------------------------------------------------------------------------------------------------------------------------------------------------------------------------------------------------------------------------------------------------------------------------------------------------------------|
| MSTRG.119476.4 | 0.27 | 0.03 | 0.00161 | -3.26 | down | TTTTGCTTGCCACAAAGCTCATCCTTCATTTGTGCACTGCCA<br>GCGCAAGCTTGGATCGCGCAAACAATCACAACTCTTTTGGC<br>TATAAGCTCTTTCCATTTGTCCCAGCTTCCAACTGCAGACG<br>AGCTGTGGCAGAGTCTGTCACGGCTGCACATACTGGTTTCC<br>GAGAATAACGCGGTAATGAGGACAGCTACCACTGGGAATGC<br>CTCCCCCACCAACAGCCAGCCGAAATGAAGCTTCTAGTTGA<br>TCCCTGGGCTTCTCACCTTCACAGCCTCAGAGAAGTGCCTTT<br>CACAGAACAGGCAGGTTTACGAAGTCATTTAAATGAAAAC<br>AGCAAAGACAGACTTCTTGTGCAGAGCAGAAGACCCTGAAGT<br>CTTTTTCACTATGGACAACAGGAAAAAAAAAAGCTTCTGAATG<br>AAAAGCAATAAGCTCTCTGAAGTGTAAAGTAACAGATTAAC<br>CCCACAATCGTAAACCTGAGCTCAGCTCCTGTACCATCACAT<br>ACTATTTATGGAATACTCACGATACTGCATGAAAAGAAGAAA<br>TGCTTTCAAGAGACTGTTCTGCCCTGAAAAAGTCACTTTGG<br>GATTTACCCTAAAACAACCCATCAAGGATGTCTGCATGATTA<br>ATTAGACTCTTACCGAATAATCAGGTCAAATCTAAAGAAA<br>CCAATATTTTGTGATCAAGAAAAATCTTTGTAAATTATTTA<br>TGATCACAAGAGGGATGGGAGGTTATCAGCAGAAATTGCGAA<br>ACAGTAAAGTGGTAAAAAAAAAAAAAAAAAGAAAAATTTAAGT<br>GTCCTTTCAAGGGACTACCGGTGTGTCTATCAGATATTTT<br>GGAGTTATCCGATAGTATAAATTCTGCGTCTTTGTCTCCGGC<br>TAGGTTATTCTAAAACGTAGAGATGGAAATTACCTTGTGGA<br>TAGTGCTGATGATGAGAAACAGGTCAATTCTGTCTGGTAGAG<br>AATATAAACTTCCTTAAGTCCAATTCTATTTAATATCTTA<br>CTGCTTCCTAATAATTGGTGAATTAGTGAGACAAATAAAATC |
| MSTRG.224424.1 | 0.24 | 0.02 | 0.00311 | -3.48 | down | CAGGCCTGGAGGGAGGGTGAGAAGTGGTGGCAGCCTGCACCT<br>GAGAGCAAGAGGAGAGGGGAACCTAAGGTGGAGGTTGGGGA<br>ACCGGTCTGCTATGGTGGGATTAGAGGCGATTGGAGGTGCA<br>CTGTGGTCAGAAGGGTCAAAGAAGAGGAGGAAAAATCCGAA<br>CAGGGATCAGGAGATATAGCACTGGGGGAAGTGGCCCAGGA<br>TGGGCTAAAAGTATTTGAGAAGTAGAACAGGAAGTACAGAGA<br>GAGGGCCAAGGTGGAAAGCGAAGAAAGCCTGAACATAAGGG<br>ATCTCTGACCACTTGCCATTGCGGCGGCTGAAGTTATAGAGG<br>TCCCATAAAGTACTGGAATGGAGAGTTCATTTTCTGGCCAT<br>TGGAACCTAATGTCCAGTCGAGATTGTGGCCAGACAGTGTG<br>GAGTGATAAGTGAGTCGCGTTGGCCTTATCTCTTCTGAAAA<br>CCCAAGGTTTTTAGGTTTTGGAGAAGGCAGCCTAAAGGGATA<br>GATTTTGTAGGTTGGGACTGAGAATTTCCGATTATAGACAAA<br>TAGGGAGGGAGGGCAAACCTAGGGCGAGAGAAAAACGAGGAGA<br>AAGGTCTCAGAGAAAAGGCACCCACTCTCATGGGTGCCGG<br>GGTCCAGCCCCGGCTGATCCAGGGTATTTGAAGGACAGACGG<br>CGTAGGCGACATATTTATTTAAATACTTATCAAAGATATAAA<br>GAGTAATAGAATGAGGATAGCTCAGTAGGAAAATTCAGTGGGA<br>GAAAAGAGGCTGAGTAGCTTGGTTTATGCAGGAGACCAATAA<br>AACTTCAAGACAAGAAGTTTGCACTTACGTGGGCCATAG<br>GCATCCTTCCGTTCTCCTGAAGGAGAGGAGACTGAGGCCT<br>CCCAGTCGGATCTTAGAGGCCAGGCATAATTAGTAAGCAT<br>GGTGGGTTCCGTGCTCCAGATGGAGACTCAGCCAGAATTTGA<br>GAGAGAGAGCGACATGGGGAGACCAAGTTTCGGTGAACAAGG<br>CCACACTTTATTTCAAAGTAGTTTTTATACCTTAAGTTG    |

|               |      |      |         |       |      |                                                                                                                                                                                                                                                                                                                                                                                                                                                                                                                                                                                                                                                                                                                                                                                                                                                                                                                                                                                                                                                                                                                                                                                                                                               |
|---------------|------|------|---------|-------|------|-----------------------------------------------------------------------------------------------------------------------------------------------------------------------------------------------------------------------------------------------------------------------------------------------------------------------------------------------------------------------------------------------------------------------------------------------------------------------------------------------------------------------------------------------------------------------------------------------------------------------------------------------------------------------------------------------------------------------------------------------------------------------------------------------------------------------------------------------------------------------------------------------------------------------------------------------------------------------------------------------------------------------------------------------------------------------------------------------------------------------------------------------------------------------------------------------------------------------------------------------|
| MSTRG.67346.1 | 0.33 | 0.02 | 0.00328 | -3.51 | down | <p>TATGACCAAATTTATTTTCAGGACAGTATAAATTCAGTTCCTC<br/> TTTCCCTCCAGAGTCTTCTAGCACTTTCAGATTCTAACACAC<br/> ATTTGCCATCTTTGTGGCAGTATAGAGACACCTTCAGAAT<br/> TTGGGGACATGGTCAGAAGGAGTCAGGAATTGAAGAATGCTA<br/> CTAGAACCCTCATAATACATCTGAGATTAACCACTTGCAGAT<br/> GTGACCTGTCTCAGTTTGGATGGCAGGTACTTGAGCTTGAAC<br/> TGCCAACAGAAAACGTCAAGTTATCATCAGACGTCTGATGGC<br/> CCTCTCTGAGAGTCCCTTTAGAGCAAAGGCCCTCTGTCTGG<br/> AAGTAAGTGCAAAGAACAAGGCCATCCACGGATGATTTTAA<br/> CCAAAGAGGAAAACACGAATACAAGCCTCTTCTTAAAGGAGAA<br/> ACATGGAACCAGAAATGAGTCTTCCTTTAAAGTCTGGGAAT<br/> TTTAATTTAGTAAAATAAGGAATCACAGAAAATTTGTCACT<br/> CAAGTAGCTGACTCTAATTATGTGAGCTTCAGACTATGCTAT<br/> ATTCCCTTCGCTGAACTCTTGTTTTGTGTGTCAGGCACAGTTCTC<br/> TCAGCACTGGAATGTAATGGAGACTCAAGCAGACAGGGTGTG<br/> TCTCCCCTTCAGAAGCACAGTCTAGAAGGTGGAAGACAATGA<br/> AGTAAGCAAATTAGTAAAGTTTCCCTAACACAGAACCAAAACA<br/> GAAAGGAACAGAAAGGAGGCTACGGGAGAAATCACGCTGCTAT<br/> TAACAATGGCTGATAACCGACAGCAATATAAAAGTGAAGC<br/> GTCTTAAACTGCACTTAAAGTGCAGTCAGTGTGAGTTGCCCA<br/> CATCATCATCAAAACACTATATGTAACAGTGATGCGGATTCA<br/> CTGAGAAAAGATAACCACGCTGCTGCTGCTGCTAAGTCGCTTC<br/> AGTCTGTCCGACTCTGTGCGACCCACAGACAGCAGCCCAC<br/> CAGGCTCCTCTGTCTTGGGATTCTCCAGGCAATAATACTGG<br/> AGTGGATTGCCATTTCTTCTCCAGAAGATATTATGCTCAGT</p> |
| MSTRG.37138.3 | 0.21 | 0.02 | 0.04164 | -3.54 | down | <p>GTGAAGTCAGACCGCTCAGCTGAGACTCCCAAGTTTCTGA<br/> CCCACAAAACACTGTGAGTGAAGTCTCAGCGTGGATGCAAATG<br/> AATGTGCTCAGAGGCTTTCTTCAGAGAAGAAAATCAGAAGAT<br/> CAGATCTTCATAGGGAGTTATAACCTTCACAAAATTTAAAGA<br/> AGTGAGGTGCTATTGTGAAAGAGCCTGCAGATTTTCCCTCCC<br/> TCCAGCTGTAAGTTAGTTAGTTGCTCAGTCGTGTCTGACTCT<br/> TTGTGACCCCGTGGAAATGTGGCCACCAGGCTTCTCTGTTCA<br/> TGGAATTCTCCAGGCAAGAATACTGGAGTGGGTAGCCATTCC<br/> CTTCTTCAGGAGCTCTTCCAGACCCAGGGACTGAACCTGAAT<br/> CTTCTGCACTGCAGACAGATTGTTTACCATCTGAGTCACCAA<br/> GAAGGCCCTTCAGCTGCGAGCACAGGAGCAAAGCCACAGAGA<br/> AGTTCATCAAATGGGATTGATTTTCTTCATGGGATTGAAATA<br/> ATCTGGTCTAAGTAAAAAATAGACTTTAAAAAATTGGATTT<br/> GAATCTAAAAGGGCAGAATCTGTGATGATCAAAATAACTGGC<br/> TTTATACTGGATGTTAGTGCTATGTAGCAATTATTCTTTAC<br/> TACTCTGATCCTTCTTGCTCTCGCTTTTATCTGCCATGCATT<br/> ACACTTTTGTAAATTAGGAGCTGATTAAGCCATGGTAGAATGT<br/> TTTTACTTTTTTCACTTCAAAAATTATTCTAGAATGTTTTTT<br/> CCCCATGCATATGTTTCACAAATAGCCTGATGACTTCTTTGG<br/> TATTGGTGTCCAGTGATCACACTGAACTCAACTAATGTGTA<br/> CTCCGTGGTGAAGAAGCAAAATTCCTATTGGTTAATTCAA<br/> TCCATATTATATTGTGATATTTGTGCCTTAAAAGGGTAAATT</p>                                                                                                                                                  |



|                |      |      |         |       |      |                                                                                                                                                                                                                                                                                                                                                                                                                                                                                                                                                                                                                                                                                                                                                                                                                                                                                                                                                                                                                                                                                                                                                                                                                           |
|----------------|------|------|---------|-------|------|---------------------------------------------------------------------------------------------------------------------------------------------------------------------------------------------------------------------------------------------------------------------------------------------------------------------------------------------------------------------------------------------------------------------------------------------------------------------------------------------------------------------------------------------------------------------------------------------------------------------------------------------------------------------------------------------------------------------------------------------------------------------------------------------------------------------------------------------------------------------------------------------------------------------------------------------------------------------------------------------------------------------------------------------------------------------------------------------------------------------------------------------------------------------------------------------------------------------------|
| MSTRG.69346.1  | 0.22 | 0.02 | 0.00564 | -3.58 | down | <p>TGAGCAAGTGGACACAGAAGTTCGAGCCTTAGGAAGGATGTC<br/> TGGGATGGAATCTGTATGGATTGGGAGTCACAGAGTTCGTG<br/> GGAGAAGGACACCAACACCCAGGTCAGCACGTTAGGGTGAGA<br/> GTAGAGACAGGGCCGTGGACAAGACTCTGGGGGCGTGATT<br/> TCTGCGGCAGAGATGACAGAAAGAAAAGAACAGTGATGATC<br/> AACAAAGTCCCTGTACAGCACAGGAACTATATTCTATAT<br/> CCTGTGATAAACACAAAGGCAAAGAACATGAAAAAGAGTAT<br/> ATAGTGTAACAGCGAGTTTGTGTACAGCAGAAATTAACAC<br/> AACATTGTAATCAGCCATACTTCAGTACATTTTCTTTAAAA<br/> GGAAAGAAAGGAGCCAGTGAAGGAGGAATCAGGTTAAAAGAG<br/> GGTGTTTTCAGGGAAGACATGGGAAGAGCGTTTCAAGGAGGA<br/> AGAAATAATTAGTGGCAAACGCAGGTTAAAGGATCTAGTTC<br/> TGCGCTTGCCAGCTCTGTGAGGTTGGGCAAAGTACTCGACA<br/> TCTCTGTGCTCACTTTCATCTTGCATAAAAGGCGCACACGC<br/> ATTGTAAGTGTCTCACAGGATTGTTACAGGAATTAATGGTG<br/> TAAAGTGTCTATAAAGTGCTTAGAACAGACCGTGGCAGCAGT<br/> AATTGCCACTGAATGATGACTTCACAGTAAGGTCAAAATGAT<br/> GACTTCACAGTAAGGTCAAAATGATGACTTCACAGTAAGGTG<br/> ACATAAAGGCCCTGAAGCCCTAGTGGACTTGGGAGGGGTTTA<br/> TTCATCCCTCTTAGGTCTGTGTCCCTACTGTGTTTTAGGCAT<br/> GTTAGATAGTTACTTTCAGTCAGTAAGTCGTGTTTACTCT<br/> GCGACCCATAAGCTGCAGCACGCCAGGCTTCCCTGTCCCTC<br/> ACTATCTCCAGAGTTTGTCTCACACTGATGCCATCGAGTCG<br/> GTGATGCCAGCAACCATCCCATCCTCTGTTGCCCTTCTC<br/> CTCTGCCTTCAGTCTTTCCAGCATCAGGGTCTTTTCCAGT</p> |
| MSTRG.221229.2 | 0.28 | 0.02 | 0.04475 | -3.58 | down | <p>CTCTTGCAAGCTATATTTGACACATGGATTGCTTTCATCTTG<br/> TTATTTTGTCTGTACAAATAATATTTATCCCTCAGGACAA<br/> GAAATCATCCATGTGGAATAAAGAACCCTTCTCAAGGTATT<br/> TAATCAGAAGATCTAAGAGAGACTTCAGGTGAGAAGATGGGA<br/> CTCAGACAAGGGATTCTTCAGTTGACTGAGCACTAGGTGGAG<br/> GGACCATGTGATAAGAAATGAGGCTTTCCTCTGGGAGTTGAA<br/> ACTGACCCCTGGCAGATAAGAAGAAAGGGGACAGGGACCTCT<br/> ATCCTAAGACCACAAGGAATCAAATTCGCCACAACACTACATC<br/> AGTCTGGAAGATAGTACATGCTGGATGATTATGGCTGACACC<br/> TTGAGTTTAGCCTTGACTGCAAGGAGATCCAACCAGTCCAT<br/> TCTGAAGGAGATCAGCCCTGGGATTTCTTTGGAAGGAATGAT<br/> GCTAAAGCTGAAACTCCAGTACTTTGGCCACCTCATGTGAAG<br/> AGTTGACTCATTGAAAAGACTCTGATGCTGGGAGGGATTGG<br/> GGCAGGAGGAGAAGGGGACGACAGAGGATGAGATGGCTGGA<br/> TGGCATCACTGACTTGATGGACGTGAGTCTGGGTGAACTCTG<br/> GGAGTTTGTGATGGACAGGGAAGCCTGGCGTGCTGTGATTCA<br/> TGTGGTCGCAAAGAGTCGGACACGACTGAGCTACTAATCTGA<br/> TCTGAGACTTGGAGCTGAGAACACAGTCGCATCACTCCAGA<br/> CTTTGACAAACAGAAACAATGAGTAAATAAATGAGCGTTATT<br/> TTAAGCTGCTTAGTTGTAGTCATTTGTTATGCAGTATTAGA<br/> AAATTAACACAGTGGCAGGGCTTCCCTGGTGGCCAGACTGT<br/> AAAGAATCTGCCTGCAATGCAGGAGACCCAGGTTTGATCCTT<br/> GGGTGAGAAAGATCTCCTGGAGAAGGGAATGGGTATCCATTC<br/> CAGTGTCTGCCTATGGACAGAGGAGCCTGGTGGCTATAGT</p>                                   |

|                |      |      |         |       |      |                                                                                                                                                                                                                                                                                                                                                                                                                                                                                                                                                                                                                                                                                                                                                                                                                                                                                                                                                                                                                                                                                                                                                                                                                                          |
|----------------|------|------|---------|-------|------|------------------------------------------------------------------------------------------------------------------------------------------------------------------------------------------------------------------------------------------------------------------------------------------------------------------------------------------------------------------------------------------------------------------------------------------------------------------------------------------------------------------------------------------------------------------------------------------------------------------------------------------------------------------------------------------------------------------------------------------------------------------------------------------------------------------------------------------------------------------------------------------------------------------------------------------------------------------------------------------------------------------------------------------------------------------------------------------------------------------------------------------------------------------------------------------------------------------------------------------|
| MSTRG.170006.2 | 0.73 | 0.05 | 0.02381 | -3.68 | down | <p>TTCAGAGCCGCTGAGAACGAGCCTGCCCTCCTCGCCCCTTCA<br/> GGACCGCGGGAGCGGTCTGTGCGGCCCTTACGCACCACCAC<br/> CCACGCCCGTTCGGGGAGGGCCAGAGCGCGCTGCCCCGCTT<br/> CAGCCCCTCCTCGCCCCTCAGAGCTACAGGAGCGCTCCA<br/> GCTTTTCAAGTCTGCCGCCATCTTTACGGCAGCAACTTCCC<br/> AGCCTGCCTCGCGCTCAGGGAGAGGGAGCTCGGGCCGACAGG<br/> ATACGGAGGGCGGGCCGGCGGGACGGGTGGGACCTGTGGGG<br/> AAGGCACTGGGAAGACTTCCTATGTTCCAGACTTCCTATTCA<br/> AACCTGTCAGGGAAGTTTCAATGCAACAGAACACGTCCGGAC<br/> CCTACAGAATAAAACTTCGAACTTAAACCAGTCACCTAGAAG<br/> TAACAGCAGTCTTACAATGAGATCCGGACGGATTGGTTTGGC<br/> CAAAAGTACACTGCAAATTGGAGTTAGCCGCAGCAGGCCCTG<br/> AAGAAGGCGATGGCAGCCCACTCCAGTACTCTTGCTGGAAA<br/> ATCCCATGGGCGGAGGAGCCTGGTGGGCTGCGGTCCATGGGG<br/> TCGCTAAGAATCGGACACGACTGAGCGACTTCACTTTCACTT<br/> TTCACCTTTCATGCCTTGGAGAAGGAAATGGCAACTCACTCCA<br/> GTACTCTTGCCGGGAGAATCCCAGGGTCGACGGAGCCTGGTG<br/> GGCTGCTGTGCAACACGACTGAAGCGACTTAGCAGCAGCAGC<br/> AGCAGCAAGCCCACTTTTTTGGCACGACTACGCTGCCAGTAA<br/> GAACCTTGACAGCACAGGTAGCATGTAAACTTACAGCAAACAA<br/> ACCGCTGTTTGCCTCAACTGATCTTTTTAAAGAGTATTGCCT<br/> CCTGTAGCAGCGGTCAGTAGATTATCTCTCAGCTTACATTC<br/> ACTCTCAGTTCTCATCGCGGATGGACCTGGGCCTTTTGAGC<br/> ATTAGTCCTTTGCCAAGTAACCCAGTGTGAAGCTTTGCCAGG<br/> AGAAACTGCTTGGAGGCAGTGTGGGAGGGAAGGGCTTTGTT</p> |
| MSTRG.110319.4 | 0.21 | 0.01 | 0.0031  | -3.76 | down | <p>CTAAGAATTATCTGCCACAGAGCCACAGGCTCAGACCAAAG<br/> AACCTGAGACCCTGTCCTTGGCTAAAGCCAAGCTTTTTAA<br/> TTTTCTTTTTTAAATTTTTGGCTATGTAGGATATGAGTCCC<br/> CAACAAGGGTTTGAACCCACACCCCTGCATTGGAAACATGA<br/> TGTCTTAACCACTGAATTGTTGGGAAGTCTTTGAAGCCAAG<br/> CTTTGTCCCCTATCTACAGCAGTCCAGTGTGGGCAGGAAG<br/> TGAGCTGATGCTGGCTTCTCTTTGTCTTATCCAAGTTGGGG<br/> CATGAGATTTTCTCTGCATTAGAAGGTTGTTGAGACCTGAAG<br/> CCTGGGAAGATGCATTGAAAATTATACAGGCGCTCGTTGTGA<br/> AGAGGTTTTTCTCCCAAGCTCCAGTATCCAACTAAAAGTGA<br/> CCTGTTACAGCTTTCGTGGCATTGACTGTTCTTCTGGGAAC<br/> TCTTATCCTTGGAGCCCTCTACTTCTCTGCAGGAAGGGCCA<br/> TCTTCAGAGGGCCAGTTCAGTCCAGTATGATATCAACTGGT<br/> AGAGACAAGCGGTACCAGTGTCCCCACAGTCATGGAGAACA<br/> TTGAAGAAATAACACAGTGAAGCCAAATCATTGCTTCTTTGT<br/> TACAAAGGCAGAAAGTGAACACTAAATGGTTTTTCATAAAG<br/> CAAGACTCAAATTGTTTCTACAAGTAAAACCAAGTCAGTCA<br/> TCTAAAATCTCAATTTCAAATCAAGAGGATTTAGAGTCTTCT<br/> GTTTTTATTTAAATGGAATTTATGGTGGTGTAAATGGGTT<br/> AGGCTGTGTGGGCACAAAATGACACAAGTAGATTTAATTATT<br/> TTCTCAAAAATCCTGTAGAATGCATAGGAAATTATCAGATT<br/> TGTAAGATTTATTTTACATTCTTTCATGTTCACTGTGTCAA<br/> ATTTGCAGTATAAATCAGTGGCAAACCTTTGCTGTTCCGGCT<br/> TCTCTTACTAGATTGAAAAGTGGTTTTATTTACCAGTGGTCC<br/> AGGTTTAAAGCAAAGTTGAGAATTACAGCAATGAACTGGCCTT</p>           |

|                 |      |      |         |       |      |                                                                                                                                                                                                                                                                                                                                                                                                                                                                                                                                                                                                                                                                                                                                                                                                                                                                                                                                                                                                                                                                                                                                                                                                                                         |
|-----------------|------|------|---------|-------|------|-----------------------------------------------------------------------------------------------------------------------------------------------------------------------------------------------------------------------------------------------------------------------------------------------------------------------------------------------------------------------------------------------------------------------------------------------------------------------------------------------------------------------------------------------------------------------------------------------------------------------------------------------------------------------------------------------------------------------------------------------------------------------------------------------------------------------------------------------------------------------------------------------------------------------------------------------------------------------------------------------------------------------------------------------------------------------------------------------------------------------------------------------------------------------------------------------------------------------------------------|
| MSTRG.231934.38 | 0.11 | 0.01 | 0.01707 | -3.84 | down | <p>GAATCCTTTGGGGACTTTGGCTTATCCTGTGTGGGTCTCAGG<br/> TCTCAGAGCCGCATTCTCCTCGTGGTTGGGTCTTGGAGGTA<br/> GAGGACTAGCCATGGGCCTACCTAGCTCCTCGTGATCCTTTT<br/> GGTAATGCACACAATTGATATGGGTAAGGTCAGTCCTGGTGG<br/> GAGTTGAGATTGTAATGACAGGCCTTGGTCCAGAGCCCACG<br/> GTTTTGTTACCTTTCCTTATCAGTGTGAACCAAGTGCTATAT<br/> GATGATTAGATGGAGGTTTAGTTCACCTTTAGTCAGGAATAT<br/> GGAATAAAATGGCAACCCACTCTAGTGTCTTGCCTGGAGAA<br/> TCCCAGGGACAGAGGAGCCTGGTGGGCTGCTGTCTATGGGGT<br/> TGCACAGAGTCGGACATGACTGAAGCGACTTAGCAGCAGCAG<br/> CAGCATGGAATAAAAAGTCATAATTGCCATAAGGGCCCCCTAA<br/> GATACCAAGTTTACCTCCATTCAAAGATAGGATATTGATTGA<br/> GCTCTAAAGAGGGTAGGCAGCTAGGAGGATCAGCATTAGTTC<br/> AGATCTGAGTTCTAATGCTTTGGTATATTTACTTGGTGCCTC<br/> TGTACCCAAGATGTCTCATTTTAAAAAAAATAATAAATATT<br/> TAACCCATAAAAAAATAGAGGCAAGGATCCTTATTAATGT<br/> GTGTGTTGTAAGAGTCTTTGCCAGATAAAGAAGATAATTGTG<br/> ATGCTAATAATAGTGCTTGACAAGAGTGAATTCTGAGGTCCA<br/> TGGTGTGGACCTAGATGACTTGTCTTAAGGTGGTAAAAGTAA<br/> AATTAAGCTAGATGCATACTTTGACTGTTCTTACCTTTGT<br/> TTCTTCTCCTTCTCTATCCTGCAGGTGACACCAAAGTGTG<br/> ATCAGAAACCATGCCACAGGTGAAGAGGTATATTGAGCCCTG<br/> CCTGGCCAGTGAGGTTACTAGAGAATTGGAAGAGGCTCAAGT<br/> CAGCATCCTGCACATGGTTATCAAACCATGTGAAGTCTTAA<br/> TTCTTGGGCAGCTAGAAACCTTGTCACTGGTCAAGAGCAACA</p> |
| MSTRG.148892.2  | 0.65 | 0.05 | 0.00629 | -3.89 | down | <p>CACAGTTACTTTGGTCCCAGGTTTGGAGCCAATGCCCGGAA<br/> CGCGGGAGAGAAGAGGCTGGCTGCCGGGGGTGCTTGAAGG<br/> CTGTACTGGGAAGGACCGAGTGAGCTTCCACACCGGCGGAGC<br/> TCCAGCTCTGCGCCAGGCGGATAGCACAGAGCCCCGGCCG<br/> AGAGGCTGCTCTGTGCCGGGCGAGCCTCCCAAGGCCTGCC<br/> AGCTTCTAGCGTTCGCGCCCGGAAGGAGCAGGCTGCGGGAG<br/> TGTGGGAGCCGTGAGTGGTGCCTGACTGGTGCCTCAGCTCAG<br/> CTCTCGCTTCCCTTCGGACCTAGGAGCCAGGCGTCTTGCA<br/> GAGGGCTTCGGGGCTGGGGGTGTGCACACTGCCAAAGCCTCC<br/> CGCGGGGAGAGCTTTTCCGAGGGAAGGAAGCGCCCCAGGC<br/> TGCATTCCAAGCTGGGGCTTCCCCGCCAGACTAAGCGCCG<br/> CACGGAGGGAATCAGGGTCCCGGTGCCCTGGCTTGGGGAGG<br/> CAGCTCCACAGCCAGAGGGTTGCTCCGTTTGTGCCAGAAAG<br/> CGCTGCCAGACCGGCCTTCCCTGGAGCTGTCTGCCGCCT<br/> AGAGGCAGGTGGATGTGCTGTGCGGGCTTCCCCTGGGCGTTT<br/> GGGCTCCCTAGCACAGCCGAGCGCAGGGGAACCAGCCCATG<br/> ATCAGTGAGCTCCGGGCAGTTACTCTGGTCCCAGGTTTGGAG<br/> CCCAATGCCCGAACGCGGGAGAGAAGAGGCTGGCTGCCGGC<br/> GGGTGCTTGAAGCCTGTACTGGGAAGGACCGAGTGAGCTTC<br/> CACACCGGCGGAGCTCCAGCTCTGCGCCAGGCGGATAGCA</p>                                                                                                                                                                                                                                                               |

|                |      |      |         |       |      |                                                                                                                                                                                                                                                                                                                                                                                                                                                                                                                                                                                                                                                                                                                                                                                                                                                                                                                                                                                                                                                                                                                                                                                                                                        |
|----------------|------|------|---------|-------|------|----------------------------------------------------------------------------------------------------------------------------------------------------------------------------------------------------------------------------------------------------------------------------------------------------------------------------------------------------------------------------------------------------------------------------------------------------------------------------------------------------------------------------------------------------------------------------------------------------------------------------------------------------------------------------------------------------------------------------------------------------------------------------------------------------------------------------------------------------------------------------------------------------------------------------------------------------------------------------------------------------------------------------------------------------------------------------------------------------------------------------------------------------------------------------------------------------------------------------------------|
| MSTRG.83783.3  | 0.32 | 0.02 | 0.02356 | -3.89 | down | <p>TCCTTGGGCGCTCCCGGAGACCCCAAGACGGGGGGCGGGG<br/> GCTTTCAGGATGGTGCGGACACCCTCCGCACAAAACCCAGCC<br/> ACAAGTTTTATTTTCCTTTGCGCTGGAAGTCTGTCTGGCT<br/> CTCGATCCACACCGGCACGTCTTGC GCGGCTCCCGCCCTC<br/> CCCGGCAGAGGAAC TTTGTATCCACGTCCATAAGTCAATCA<br/> GGCTGCAGTTTTGCCTTCTCATGTTGCCTTTCTCTGGTTATA<br/> CTGGCCTCAAAAAATGAACTGGTAAGTTTCTATAAACAGCA<br/> TACAATTGGACCTTGTTCCTTTATTTATTGGGTTGACTGGTA<br/> TATCCATGGCCTTATTTCAATTTTTCCCTATGATGAACACTTA<br/> TAAACCTGCTATTCAACCAGAGACTAAAACAGCAACGGTGAC<br/> TGACAACCTCCTTGTGCGTTCTCCCCGTTTGTCTCACCTAAA<br/> GAAACTGCCAGTCTCAATCTTGTGCGTGAGCTGATTAAGAAG<br/> AAAGCTGACTCCTACCTTCCAATCTTGTGCCATTTTCATCTG<br/> CTTCCAAACATAAAGCCGCCGCTGCTTTTGAAGATCTTGG<br/> CTGGTTTAAAAAGGCAGATTCGGGATTTGTGTGCAGGATTC<br/> AGGAATGTGGGTCTTCTGGTTTGT TTTGTGTGTGGATGGCA<br/> CAGCAGAAGGGAAACAAAGCATTCTGCTGCCTCGCATGGAGG<br/> TTCTTCTAGTAGCCAGGCGACCTTGAGCGGAAAAGCCACCCT<br/> CAGTCTCCAGTACCCATCTGTAAACTGTGGGTCATATGGT<br/> TTAAAGTATCTTGGTCTCCTGCAAGAGGTGAGCCTGATC<br/> TTCCACCCCCACCCGGGTCCCCAGCGTGGGCTGTACTTA<br/> GTCACTGGGTTCTGATGAATAGAATGTGGAGGAAATGATGGT<br/> GGATGAACTCCAAGGCTGGATCAGTAAAGGCACCTGGCTCCC<br/> GCCTGGCTCCATCTCTCAGGTCACCTAGGGAAAGCCAGCTT<br/> TCATGCCGTCAAGATGCTCAAAGAGCCTGATAGACAGCCCCA</p>       |
| MSTRG.103983.4 | 0.17 | 0.01 | 0.0282  | -3.91 | down | <p>CTGAAGTCCCTCAGGGAAC TTTGTAGACCGGGATCTTGGCTTCA<br/> TGATAATGCTCATT TTTGGAGGAAAAAGAAAAAAAAAAAAA<br/> ACTCTTCAAGAATTCTGATTAATACATTT CAGCTGTGTTTCT<br/> ACAAAGATGGCTTGAATATATTCCATTTTCAAAGGAGGTTG<br/> TTGAAGAAATCCACATTTCCCGGAATCCAATTTCTGCCCCC<br/> AGTCCAGAACAGAGAGAGGTTTCTAAAACACAGAAGCTTTTT<br/> CCTCTTTCATACTGAATTTACTCCATCACCAGGCTGTTCCGGA<br/> AGTGACAGTTTGT TTTCTGCTTTGCACTGCCAAGGGAGGAAC<br/> TGGATTTTGAATCTATTCTTCATCTGGTACAAGGGTAACCA<br/> ACAGAGTGAAGAGCCACTTGATCGCATCTCTTTTGCATTT<br/> CACAAATACCAGGATTAAGGTTTCCGACCGTCTAAAAGTGCT<br/> CAGGTTAGAGAAAAGGAAAACAGAAATGACCGCAGGTACAGT<br/> AACGACACCGGAGAGCTGT CAGGGAAGTCCATTT CAGGACG<br/> ACCACAAAAAAACTCCTCTCGGGGAGCCAAGAAGTCAGA<br/> GAGGGAACAAAGCTCTCCACACTTGAGCTGGACTCACTGTTG<br/> TACCTGCGAACGTAATTTCCGCTGTGTCCCCTGATTAGAATC<br/> TGACTCCATGCCTTTGTGAATGAACTATCATTCAATCTCA<br/> CCAGGCAGAACTATTCTCAAGGGCTGTATGACGTCTGTAG<br/> GAAGGCAGTTCAAACATCGCAGGGAAGTGAGAGAGAGGGAA<br/> AAAAAAAAAAAGACCCAGCGCCAGCCAGCGGGTCTAGTCA<br/> ATTGCTGAAATTTACAAAGCTTCTTTGCAGATCAGCGCCAGA<br/> GAGGAGGAGTGAAACCAGCCAAACAGAAGACATCTCGAAAC<br/> TTATTTCTCCTCTGAGAAATGAGGTGTCTCTTGTTATTCAA<br/> GGTCTTATCATATTTGAATTTGTAGTGTCTTCACTGTGGAT<br/> TTCACCCACTGGAACAGAACTTCCATGAGCACAGGGATTGCC</p> |

|                |      |      |         |       |      |                                                                                                                                                                                                                                                                                                                                                                                                                                                                                                                                                                                                                                                                                                                                                                                                                                                                                                                                                                                                                                                                                                                                                                                                                                          |
|----------------|------|------|---------|-------|------|------------------------------------------------------------------------------------------------------------------------------------------------------------------------------------------------------------------------------------------------------------------------------------------------------------------------------------------------------------------------------------------------------------------------------------------------------------------------------------------------------------------------------------------------------------------------------------------------------------------------------------------------------------------------------------------------------------------------------------------------------------------------------------------------------------------------------------------------------------------------------------------------------------------------------------------------------------------------------------------------------------------------------------------------------------------------------------------------------------------------------------------------------------------------------------------------------------------------------------------|
| MSTRG.90432.1  | 0.45 | 0.03 | 0.0425  | -3.94 | down | <p>TTTTTGAGTCAAACCAATTCCTACCCTCTCTGCAGAAGTTGA<br/> TGATGCACAAGATTATCACAGGCAGTCTGTCTTCCAGCGACA<br/> ACCAGCCATGGGCAGCCTTCTACCTGGTGGGACAGATTTCAA<br/> GGCCTGCTGTTCTGCTAAATGCTGAAACAGCGTCTGGGGTGC<br/> CCACCCGTTTCAGCGCACTCTGTGACATGGTGACAGCGTCTCC<br/> TCGTCTGCAGAACTTTCCTCAAGAACGGACCAAGGACAAGGG<br/> CGGACAGAGCTTAAAAGACGTGAACGCTGTACCCCTCCAGGA<br/> GGAATCTCCATAAATTCCTCAGTTCTAGGGAACAACAGAGTC<br/> ACCTACTGACACAGTGGGTGTTTTGGTCAATTTTTGTCCCTC<br/> CAGCGAAAAATTCATGTGTGAGAAGTCCAGTGGTTAAGATTC<br/> CCCACTTCTAATGCAGGAGGCATGGGTCCGATCCCTGATTGG<br/> GGTGTGCAGGGAGTGTACCCTGGAGCCTAGCACCTCCGGAG<br/> AGGTCTGCTGACCAGCCGAGGGCAGCCGCTTGCTGGGGGA<br/> CGTCGTCTGGGAACCACCACTGGCCGGTTGCCGTGGGTTTCAG<br/> GAGTCCGAGTGCACAGAGGTTGCCTTGGGGATGCTGGAAGAG<br/> GCAGCATTTCTGGCCAGCCAGGTGAGCAGAGAATACTAGCG<br/> GGAATAAGAGCAGACTCGCCAGGCCACGGGGAGAGGGCTGCA<br/> AAATTAACACACAGCTGCTCTATTTGTCTGTAAGAGGAGCA<br/> GTCGGTCTCCACCAGCTCCACCCGCGGGATGGCTGGGATAA<br/> AGGGAGTGGGGTGGGAAAGTCCTTACTGCAGCCTCATCAGA<br/> TCCAGTAACTCATGCTTGAGTAACTCAGAGCTTACTGGGATG<br/> ACGTGGGTAAGTGCAGACGTGGAGGTTTCATGTTATGATGAGC<br/> CTGGGAGTGTGGAAGAGGGGTGTGGCTAGCTGTGTCCCA<br/> AGCCAGCGGCACAGCCGCCCTGCCTTAGGGATTCTCCTT<br/> GATCACCTGTCTTGGCTGAAAATGTCCGCGGTTGGTTTTGCCT</p> |
| MSTRG.187574.3 | 0.17 | 0.01 | 0.01195 | -4.07 | down | <p>GGAGCGTAAAATAAATGCTTCTCAGTAGAGTGAGCGCAAATA<br/> AAAATTAGCCCCGCTTCTCTCCACACCTCCAGGAGATTGCG<br/> CAGGACGCAAGTATCCCAGACTCCAAGTTCCGAGACGCGC<br/> ATCCCTGCAGGCAGCGCCACTCACCTCGGGTGCGGCGCCG<br/> CGATGCCTCCGAATCAGACGAGCGCTGACAAGTACTCGCGG<br/> TGCTTGCGCCTTCTCCACGGCCCGCGGAACTTCCGCCTCCT<br/> GGCTCCCGCCCCCCCCCCCCCTCCAGCCCCAACACACACA<br/> CACACCGCCCCCGCCCCGAACCAGGACACACCCCTCCGCT<br/> CCTGGCCACGCCCCGACCCGAGAGCTGCGGGGAGCTGAGA<br/> GAAGGCTGCGGGTGAACCTAGCTGAGGGTAACTGCAGCGAG<br/> TCGGAGCTGCTGCGGAAAGACAATTGCAGTACGGAGTTTCGG<br/> TGGGACCAGTCTTAGGGGGTTTTGAGCAGTACCTGACAATGG<br/> TCCGCTCTGCCTGTTTGTCTGTGCTGGATGCATTTTTCTCT<br/> CCAGAACTGAATTGGCAAGCAGTTGCTTTGGCTAAAAATAG<br/> GAGAGGGCTTTGGATAAATCCGTATCTATGCAAGTTCAGCGG<br/> CCACTGCCTGGTTTTTTGAGCAAGCTTATGTGCCCGGAGAA<br/> GTGAAGACTTTAAAGTTGACCTGTTAGGAAAGGGAAAATCAG<br/> CAACTTTAATATCTAGAAGTTAAATCCTTAGTCAAACCAGA<br/> AGACCGTGTTTAAGAGCAGCGCCAAAGGTGGTTCAACCATT<br/> ATAACCTCAGCTTATTTTTCTAAGTCCAGATCAATAGTCCAC<br/> TTCCAGTTTCTATAAAGGTGCTTGATTTAGCCCAAGGGATT<br/> TATTCATGAGCAAATTTGAATAACGTTTCAGTGAACATAAGAG<br/> AAAGTAACTTTTAGGCTTGTTTTGAACTGTAAATTGGCTTAT<br/> AACATGTGAAAAGGACAGTTCTTAACCATGGAACCTGTAAAG<br/> CAAGGCTGATGGAGTCCGTGGGTCCCAAGAAGTCAAACAA</p>             |

|                 |      |      |         |       |      |                                                                                                                                                                                                                                                                                                                                                                                                                                                                                                                                                                                                                                                                                                                                                                                                                                                                                                                                                                                                                                                                                                                                                                                               |
|-----------------|------|------|---------|-------|------|-----------------------------------------------------------------------------------------------------------------------------------------------------------------------------------------------------------------------------------------------------------------------------------------------------------------------------------------------------------------------------------------------------------------------------------------------------------------------------------------------------------------------------------------------------------------------------------------------------------------------------------------------------------------------------------------------------------------------------------------------------------------------------------------------------------------------------------------------------------------------------------------------------------------------------------------------------------------------------------------------------------------------------------------------------------------------------------------------------------------------------------------------------------------------------------------------|
| MSTRG.67346.3   | 0.37 | 0.02 | 0.00953 | -4.16 | down | GGACAGTATAAATTCAGTTCCTCTTTCCCTCCAGAGTCTTCT<br>AGCACTTTTCAGATTCTAACACACATTTGCCATCTTTGTGGGC<br>AGTATAGAGAGCACCTTCAGAATTTGGGGACATGGTCAGAAG<br>GAGTCAGGAATTGAAGAATGCTACTAGAACCCTCATAATACA<br>TCTGAGATTAACCACTTGCAGATGTGACCTGTCTCAGTTTGG<br>ATGGCAGGTAAGTGTGAGCTTGAAGTGCACAGAAAACGTCAA<br>GTTATCATCAGACGTCTGATGGCCCTCTCTGAGAGTCCCTTT<br>AGAGCAAAAAGGCCCTCTGCTGGAAGTAAGTGAAAAGAACAA<br>AAGGCATCCACGGATGATTTTAACCAAAGAGGAAAACACGAAT<br>ACAAGCCTCTTCTTAAAGGAGAAAACATGGAACCAGAAATGAG<br>TCTTCTTTAAGAGTCTGGGAATTTTAAATTTAGTAAAACATA<br>GGAATCACAGAAAATTTGTCACACTCAAGTAGCTGACTCTAATT<br>ATGTGAGCTTCAGACTATGCTATATTCCTTCGCTGAACTCTT<br>GTTTTGTGTGTCAGGCACAGTTCTCTCAGCACTGGAATGTAATG<br>GAGACTCAAGCAGACAGGGTGTCTCTCCCTTCAGAAGCACA<br>GTCTAGAAAAGTTTCCCTAACACAGAACCAAAAACAGAAAGGAA<br>CAGAAAAGGAGGCTACGGGAGAATCACGCTGCTATTAACAATG<br>GCTGATAACCGACAGCAATATAAAAAGTGAAGCGTCTTAAA<br>CTGCACTTAAAGTGCAGTCAGTGTGAGTGGCCACATCATCA<br>TCAAAAACACTATATGTAACAGTGTGCGGATTCAGTGAAGAA<br>AGATAACACGCTGCTGCTGCTGCTAAGTCGCTTCAAGTCTGT<br>CCGACTCTGTGCGACCCACAGACAGCAGCCACCAGGCTCC<br>TCTGTCTTGGGATTCTCCAGGCAATAATACTGGAGTGGATT<br>GCCATTTCTTCTCCAGAAGATATTATGCTCAGTATTAATAAT<br>GAAATAACTTTGAAAGATTTTACCCTGACTAAAACACATGC |
| MSTRG.184700.12 | 0.23 | 0.01 | 0.00112 | -4.3  | down | CCCGGACAAAGGTCCTTCGCGGCGCAGGTGCGGACGTGGAG<br>ACCGTGTCTGCGGGTCACTCTGCGGGTGGTCCGATCGTTC<br>AACCCGGGGAAGTCGGAGCGAGAAGAGGACGAGCGGCGCGGT<br>CGGAGCGCGGTGCGGGACCCAGGGAGTGGGGCCTGGCCGTGC<br>GCTTCGCCCCGCGCCGTCCCGAGCTGTCCCGCCCTGGGAAGA<br>GTTGTGGGACATGGCATGGCTTTGCTCTTTGCCCTTTCCGC<br>GCGTGAAGGGGAGAATCATTTTGAAGCCAGAAGTCCGACCG<br>ATGGGCCAGGGCCTGTGCAGCCGTGGGCGGATAGCGCAGCG<br>CCGGCTGCGTCCGAGCGGATCCTCCGGAAGGGCAGAGCTG<br>CAGACCAGCGCGCCCCGGCTCGATCGGGTCAAGGCGACTC<br>TTGAGGACGGTACCATCAAGGTGCGAGCCTGGGAGAGGCTGG<br>CCTCCCCTGCCAGACCAACTCGGTGACGAGTCTGCTGTTGCC<br>CGCAGCCTTCGGTGTGGATCCACCGTGTGCCTGCAAGGCTCT<br>CGGGAAGTCCACATTCGTTTGCTCAGACAGACAACAGCTTTG<br>GACGGTATGTGTAATGGCTGCTTCTGAACATACATCATGGA<br>CGCCTCAAGAGTCTAGGCTTACAGCCCAGAAGGTTCTCTGC<br>GGCCTGATTGGCTCTAGAGCCTCGGCTTCTCCCCGGACTC<br>GCACCTCTGCCCCAGATGCTGTGTCTTAGAAGCCTGCGCTC<br>ACCGGCACCCTGCCCACTGCCTGCCCTGGGAGCCGTGAGC<br>CCCCTGAGGCCCTCCTGGAGCTGTCTTGGCCACAGTGGGGCG<br>GCAGAGTGGGGCACACACCAGGGTCTGTGCATCTGGGAGCC<br>CCCCTGGTGGGGTGGTGTCTGGAGGACATGGCCTGCAGGCTC<br>GCCTGCCAACTTCTGACCCCTCCCGCGTGTCTCAGGCCCT<br>CCGAGGGCTTGAATCCTGGCACAGCGCCACCAGGGTGGCCG<br>CGCACCTCCGCCCCGCGTTCGATAGCACTCAGCGTTTCCA                           |

|                |      |      |         |       |      |                                                                                                                                                                                                                                                                                                                                                                                                                                                                                                                                                                                                                                                                                                                                                                                                                                                                                                                                                                                                                                                                                                                                                                   |
|----------------|------|------|---------|-------|------|-------------------------------------------------------------------------------------------------------------------------------------------------------------------------------------------------------------------------------------------------------------------------------------------------------------------------------------------------------------------------------------------------------------------------------------------------------------------------------------------------------------------------------------------------------------------------------------------------------------------------------------------------------------------------------------------------------------------------------------------------------------------------------------------------------------------------------------------------------------------------------------------------------------------------------------------------------------------------------------------------------------------------------------------------------------------------------------------------------------------------------------------------------------------|
| MSTRG.53914.1  | 1.27 | 0.06 | 0.00298 | -4.38 | down | AGGCAATGGCACCCTCCAGTACTCTTGCTGGAGAACCC<br>CATGGATGGAGGAGCCTGGTGGGCTGCAGTCTATGGGGTAC<br>TGAGAGTCGGACACGACTGAGCGACTTCACTTTCACTTTTCA<br>CTTCCCTGCATTGGAGAAGGAAATGGCAACCCACTCCAGTGT<br>CCTTGCTGGAGAATCCCAGGGACGGCGGAGCCTGGTGGGCT<br>GCTGTCTATGGGGTACACAGAGTCAGACACGACTGAAGTAA<br>CTTAGCAGCAGCAGCAGCAATCATTGACCTTGGGAAAAG<br>CTAGCCGCCATGTCCTGGGGTGTCTCAGAATCTCTCCCGAG<br>ACGCCCAGATGGTGAGGAACTGGGCCCTCAACAACATGAGTG<br>ACTTTGGAAGCACACCTCCTCCAGCCCCAGCTGAGCCTCCG<br>ATGACTGCAGCCCTGCTGACGTTGTTACGGAACAAAGGTTT<br>TGCGCCCGATGCACAGTGGGGCCAGAAAACTGAGACACTGG<br>AGTCTGGACCAGGAAAAGGCTGATTGCAGCGCAAGCAAGGA<br>AAACAGGGCCCTGTGCTCAAAACCCCTGAACTCCCTGATGG<br>TTTGGGGGAGAAGGTTTATAGGCAAAATTTGACTCAGAG<br>TTGACGGGTATGTGACTTTCTTCTGATTGGTTGATGGTGGGT<br>GGATAGGGCTGTACTCCTGGCATCTTGGGCTCAGCCTGAAGT<br>TGCCATCTTCTGTCTGGGAGGGCCCTCGTTCTGCCGAAGG<br>TACTGTTACCTAAATTCATTGAGGAGGAATCAGGATCCTGAC<br>CCAAGGCTAGTTGGGTATAGTTGATTTACAATGCTGTGTTA<br>ATTTACAGCTGTGCAGCAGAGTGATTACAGTTATACATACAT<br>ACATTCTTTTTTAAATATTCTTTTCCATTGTGGTTTATCAT<br>AGGATATTGAATATAGTTTTCTGTGCTATACAATAGAATCTT<br>GTTATCCAGTTTATATATGAAACCTTACATCTTTTAAACCC<br>AACTTCCACTGCATCCATCTCCTACCCCCATTCCCCTTGGC |
| MSTRG.153391.3 | 0.51 | 0.02 | 0.00127 | -4.57 | down | CCAGCTTGACGAGGAATCTTGAAGCCAGTGGGTCCAAGC<br>TGGCCAGGGAAGCGCCTGCACGGGGCATTAGGTGTGAAGT<br>AGCTGCAGGGGTGTGCTTCGTTCTGCTCTTTCTTTTCGGG<br>TGAGGCCTCACTCTGCTCGCCTCAGGGGCCCTCACTTCAT<br>CCATACTTGAGGCTACTTTATAAGCCCCAGTCACCTACAGA<br>TTATCCCTTACGATTCCAAGCTGGTCTTGAGTTCCTCTTCTC<br>GTCTATCTCCCGACATCCAGGCCCTGGAATCTTCTCTGTC<br>CTTTCTCCAAGAGGAAGTGACACCAGAGAGGGACACAGAGA<br>AAAGGCTACTTAAGGACACAGCAAGAAGGCAGCCATCTGCAA<br>GCCAGGATGAGAGGTCTCTCTAGAAACCAATCCTGCCAGCAC<br>CTTGATCTTGCTTGACTTCTAGACTCCAGAATAGTAAAACAG<br>TTCCTCAGAACTTCTGAGCATCTGTCTCCAGGCTATGATCC<br>TCAGTTTGGCTCGAATAAGATTCCCTCTTTTCTTCTGAACCT<br>GATGGGGGATGAGGATTCAGGCAGTGAGAAACACTGTGCAA<br>AACATCCTGAAGTGAGAATTTGATTGGTGGTTTTGTGGAACA<br>ATGAAGAGGCCCAAGTGTGACTGTTGCCAAATGTGACTCCCA<br>TACCCCAACAAATGGAAGATGTTAACCACTGATGACCAGGA<br>GCACACAGGCCAGGCTCCTAGTACTCAGACTGATAATGT<br>TAGCCCCTGTGACACCATCCTGTTACCTCACCTTCAGCCAGT<br>CAGAGAATTGTGGTTGAGCTGATCACATACCCTGCAACCTCC<br>CTCCGTCACTGGGTTTTAAATATGCTTTACCAAAATGCTTA<br>GGGGAGCTTGTGGCTTTTATGTTGAGCCACCCGTCCTCT<br>TGCACGGGCCTGAAATAAACCTTTCTCTCTTAAACCCCAA<br>AGTCTAGGTTTTTTTGGACTTACTGTACATTGGGCACATGAA<br>CTGTGCTAATAAGACAAGGGTTTCCAGTGTGGTCTTCTAGG  |

|                 |      |      |         |       |      |                                                                                                                                                                                                                                                                                                                                                                                                                                                                                                                                                                                                                                                                                                                                                                                                                                                                                                                                                                                                                                                                                                                                                                                                                                         |
|-----------------|------|------|---------|-------|------|-----------------------------------------------------------------------------------------------------------------------------------------------------------------------------------------------------------------------------------------------------------------------------------------------------------------------------------------------------------------------------------------------------------------------------------------------------------------------------------------------------------------------------------------------------------------------------------------------------------------------------------------------------------------------------------------------------------------------------------------------------------------------------------------------------------------------------------------------------------------------------------------------------------------------------------------------------------------------------------------------------------------------------------------------------------------------------------------------------------------------------------------------------------------------------------------------------------------------------------------|
| MSTRG.65715.8   | 0.26 | 0.01 | 0.00811 | -4.75 | down | <p>GACCGCGCGCGGTCCGGTCCGCTGGGCTGAGCATCGCCGGCG<br/> GCGGCGGGGTGGATTTCGGGTGAGCGGAGACATCCAAAATTG<br/> CAGGGAAATACTGGGGAGAAAAGTGCCCCGGAGGAGCAGGG<br/> TCCGTAATTGCCCGTAATGATGACTGACATTTCTAAGGCCA<br/> TGGCATGGACCACAATGAGAAATACGGTTCGGTCGCCGATTG<br/> CTAAGTAGCAAAGAGCAGGCGACTGACTGAGGGCTGCTGGGC<br/> GAAAGATGGATCCCTGTGAAGATGTAGAAAAGTCCAGTGGTA<br/> AATCTGAGAACCCAGGGGAATCAGCGTCATGAACTTGAAG<br/> GACCACAGGCCAGTGGTCTGAGGCCCCCGGAATGATGCTG<br/> CTGAGCTATGGAGCCAGAAATGCGAGCTGCGGAGCAAATTGG<br/> TGCAGACCAGCAACAGTGAACAGCAAGATTGAAAGAGTTTCT<br/> GAAGAACTTGAACGGTTGTCCAAGAAATGAAAAATACTTC<br/> CCATCGGAAAGACATAGTAAACCAAGCACACTGGATGCCCTT<br/> AACTATGCCCTTCTCTGTGTACACAGGGTACAAGCAAACAGT<br/> GAGTCTTTCCAGATTCTCAGACAGAACAGAGCACCTCAAGCT<br/> GATGTGACCTTGTGCAGTCTGGAGGAGCTGGCCACTATTGCT<br/> TCAGAGCACACTTGGAAAAACACATTCCAGTACCTACTACCC<br/> AGGTTGTAACAACTGGATTTTATAGAGCAGGATACCTTTGTG<br/> GCAGTGTTTTCATTTCTCTCTGGAAGGTTAGTGCATGTTTCT<br/> GAACAGGCTCCTTCGATCCTGAATTGTAAGAATTGGAGTCTT<br/> GTCATTTTGTGAACTGCTTGCCCCCAAGACATGAGGGTGT<br/> TCTACACGCACACTGCCATGCTCAGCTTCCATTCTGGAACA<br/> ACTGGACACAAAGAGGTAATGGGACCAATATTCAGATGTTTA<br/> TCTCACCTGGTTAAGCTCACTTTTCTTACCAGAAATAGTA<br/> CACAAGTGAATGCATTATTCAGCAATGCAAATTATATGGTTT</p>    |
| MSTRG.103945.18 | 0.19 | 0.01 | 0.00195 | -4.82 | down | <p>AGAAATTGTTGATGTAATAATAAACATTCTGCAATGATGCTG<br/> CATGGGAAATAGGCCTTACCTTGCTACTCAGGGTGTGGTCCA<br/> TGAATCAATAGCATGAACATCACTTGAGAACTTTGTAGAATG<br/> CACATTCTTGGATGCTACTCCAGCCCTACTGTATAACAATCT<br/> GCAGTTTAAACAGGATTCTAGGTAATTCATAGGAATATTATGT<br/> GTAAAAAAAATGGATTGGGGCAGTATCTTGAACCTCATTAC<br/> AAATCATGCCACAGAGTATTTAATGTTCTTCAGATTCTAATA<br/> GGTCCATATAAACTCATATTATTCTGGATTTAATGCCTTAGC<br/> ATATCATGTTTGACAAGCTATTGAGAAAAAAGTATCAGATCT<br/> CATGCCTCAGGAGAGACCTGCTGGGAAATCAGTAGTGGATGT<br/> GATGCTTTTTGAGAAATTTAGCAAACATTTGGGTCATACAGTG<br/> TTAATAATTTAAAAGCTTTAAAGTGGTCAACATATTTTTAAA<br/> GGTAAAATAATTTAAGTTGAGGGGTGAAAGGTACAGCAGTTT<br/> AATTAGTTCAAAGGAAGGTAACCTGAAAAATATAGAGGAAGAC<br/> AAAAACAAAGTACAACTTACTGTTGAATCAGAATTTTCAAG<br/> TTGTAAGAAGACACTGATGCCCTCTGGTTCAGAGCTAATGTA<br/> AGCTATGACTTGAATTTTCCAAGCCAGTGTGACCGTCTTGT<br/> TGAGGCTGCCACAGAGAACTCACCGTCTCCAGCAGCTTTT<br/> ATATGTTGTTGGCCAGCTCTGTGTTGTCAGCTTGGTTTTGCT<br/> TTCAGTGAACCACTTCTGCCTCGATGACTCTTCCAGGTAGC<br/> ATTGCTGCTACTTCTAAAGCTTGGGACACACAAGGCAAGTG<br/> AAATTGCACTTTCGCTTCAGACTCTTCTATCTTTAATCGT<br/> TAGATCCGTCGGCTATGTGTTCTATTTTTTATGCCAACTAA<br/> CTGTACACTAGGGCATCTATCTTTTCATATCTTGGTCAGTCT<br/> CCTTAGACTAACTCTGTCTCACAACATCTTTTTAAAATA</p> |



|               |      |   |          |       |      |                                                                                                                                                                                                                                                                                                                                                                                                                                                                                                                                                                                                                                                                                                                                                                                                                                                                                                                                                                                                                                                                                                                                                                              |
|---------------|------|---|----------|-------|------|------------------------------------------------------------------------------------------------------------------------------------------------------------------------------------------------------------------------------------------------------------------------------------------------------------------------------------------------------------------------------------------------------------------------------------------------------------------------------------------------------------------------------------------------------------------------------------------------------------------------------------------------------------------------------------------------------------------------------------------------------------------------------------------------------------------------------------------------------------------------------------------------------------------------------------------------------------------------------------------------------------------------------------------------------------------------------------------------------------------------------------------------------------------------------|
| MSTRG.81336.1 | 0.35 | 0 | 4.47E-05 | -5.06 | down | GGGGGGCCCGATCGGAGGGGAGCGGCTCAGCTCCGCTAGCC<br>TCTATTTATAGAGCCCGGAACCCGAAATAGCGCGGAGCCGAG<br>CGGCCGGGATGACGCGGGAGCCGCCGGGGGCTGACTCACCCG<br>GCCCCGAGCGGGCCCCCGGATGGGGGACAGTGGAGGCGCT<br>GGACTCGACCCACGCCATTCCGGGCACCTCTTCTGCTGGGA<br>CGTCCCAGGTTTCCACGAGGCACTGTGGTTGGATACGCAGCA<br>AAAAGGAGGATCTGCAGCACGAGAGACTGAGGTTAGATCAGA<br>GGAGATCTTCTCAACCCAGGGATCGAACCTGCGGCTCCTGTA<br>TTAGCAGGCAGATGCTTTACCACTGAGCCATCTGGGAAGCCC<br>AACACCATGTTAGAGATGAAGAACTGAGATTCAAGGAATAC<br>CTTACATGTCCTCAGAACTGTCTCCTGAACCAGGTACCCTGG<br>CCCCGAGATGTTTCACTGCCAGGACACTGTGTTTAGTTTCT<br>ATTGGACCGAAAGGGGAGCTACTAGGGCATTCAAGCCCACGT<br>CCTATTTCTTGTGGACAGCGCTGGTCCATGGGATTTGCTGTC<br>TCTCCATCTGGGAGGGCATCAGATGATGGGATGCCACTTGTT<br>CCGGGGTCACTGAGCCTCAGGATTTCTTGTGATTGTTCCAG<br>ACAATCCATGTCAGAAGCACATTCAAACAGAGCGACTAATC<br>CTCACATCAAAAACATGGCTTTAAAGGACTCTCAAATTCC<br>TCTCTGCACCAGGTGAAGAAGCTACTTAGCCGAGAGAAACCA<br>CAGTGCCAGGCAGTATTTGCAGCCACTCTGTGTCTGGAGTA<br>TACTTTTTTTTTCATAAATTATATACACGCATGCCTTTATTG<br>GGCTTTCCAGGTGGCGTAGTAATAAAGAATCCGCTGCCGA<br>GGCAGGAGATCTAAGAGACCAAGTTCAATCCCTGGGTCGGG<br>AAGATCCCTTGGAGGAGGCATAGCAGCCCCCTCGAGTATTC<br>TTGCCTGGAGAATTCCATGGACAGAGAACTGGTGGGCTTC    |
| MSTRG.39163.1 | 0.2  | 0 | 2.96E-05 | -5.16 | down | TTGTTGAGCCTGCGTCTAACGACATGTCAACCACTTGAAGA<br>AACCAGGAATACTTTGAGCAATGATCCATCAGCACCTAAT<br>TTCAGTCAAGTTTAATTCCAGATGGAGCACCACCAACTCAGA<br>TTTGTTACAGGGATTTATAGCAATTGTAACCTAGACAATTGT<br>GGGGGCTACTAAACAGTGTCTGTTGGTCTGTCCAGCACATCT<br>GAAGCTGGAACCTGAAACCTACAAGGAAGAGAAGACAAGTGT<br>AACATGGGCAAGAACAGTACAGGCTGGAACCTATGACCAGGA<br>ATGGGACAGATGCCACCAAAACAGACTGAACCTGTGACAATT<br>CTCACTTCTCTGACCTTGACAGGCAGGTATCCAGGAGAAGC<br>CCCTTCATGGAGCTAGACACATGACTGACCAGGAGGCATAGA<br>ATGTAAGAGCAGAAAAAGGCAGAGTCATTGCGTGTCCATTAA<br>GTGATCCATCAGATAAGGCAATGGACTTGAACCTAGAAACATG<br>GTGATGTGAGCTTCTGAGTGTGAGGAACAGTATGGTTGTGCG<br>CTCACTTCTTCCAGCTTCTACACAGCATCTCTGGGACCCAC<br>CCTCATCAGAGATATGCAGGGAAGGAAACGGGGACTTTTGT<br>CAGCTCAGCTAAGCTGACGCATGGCAGAGTGGCCACTAGTCA<br>CCTTGTCTGACAACAGGAAGAGAACCAGCTTCAGCTTAGGAG<br>ATCTGTCCGTGTGACCTTAGGTACAACCACATAACCTCTCTG<br>TCTCGGTTTTAGGTCTTAATACTCTCATGTGTAATAGGGAAT<br>GCAGGGGTGACTTTTTCAACCCTCGAGGCCCTTCCAGTTCT<br>AAGTCTATACTTTTGTATCCTGTCTTGTTCGTTTCTTGT<br>GTCTGTGAGTCTTGCTTCCACATTTACTGCAATTCTGTGAGC<br>TCAGCCAGAGGAAAGCCAGATAAGAACAATGGAAGGAGCCT<br>GTGTGTTAGTCTAAGCTCTCAGAGCCGCTGAGGTAATGGTG<br>GGGTCAGAGGGCAATTGTCAGTGTGGAATTAATATTACT |

|                |      |   |          |       |      |                                                                                                                                                                                                                                                                                                                                                                                                                                                                                                                                                                                                                                                                                                                                                                                                                                                                                                                                                                                                                                                                                                                                                                                                                                       |
|----------------|------|---|----------|-------|------|---------------------------------------------------------------------------------------------------------------------------------------------------------------------------------------------------------------------------------------------------------------------------------------------------------------------------------------------------------------------------------------------------------------------------------------------------------------------------------------------------------------------------------------------------------------------------------------------------------------------------------------------------------------------------------------------------------------------------------------------------------------------------------------------------------------------------------------------------------------------------------------------------------------------------------------------------------------------------------------------------------------------------------------------------------------------------------------------------------------------------------------------------------------------------------------------------------------------------------------|
| MSTRG.82259.81 | 0.4  | 0 | 1.37E-05 | -5.49 | down | <p>GCCCTTTCTTAGTCCTGACCATTCCCTCACATAGTACCTTGAT<br/> ATGGATGGAAACACTGTTCTCACCTACCACATCCCTCCACCT<br/> TTACATACTCTCACTGTAAAGATCTCTGGCCATTTATTGAA<br/> CAAGTTTCTCAGGACATGACCTAAATCACTCTTGCATCCAT<br/> GATGACTCACAACCCATTTGAGATTGGATGGTTGAATAATA<br/> GTAAATGGACTACTTCTGTCTTGTATCTTCCTTGATATTTT<br/> CTTTCTAAGTTCCTTGATTTTTTTTTTAAATGTTTTCTAATC<br/> TATTCATTTCGGTGGGTGGTCATGTTTACAAATAAGTTTTCTC<br/> AGTCTGTAGGTTGAGATTACATAACCTGCATCTCTTACCCTT<br/> TGTGCGCCATTTGGTGTGTCTCCTCCGCTGATTAGAGAAAA<br/> CATGTTAATTTACCTCAAGCCTTTTAAAGCAGATTAGTGCTG<br/> TCAGTTGGCTTGAGTAGTGCATGTTTTATAGTAAATACTCA<br/> AAATTTTCTTCATGTTCTTTGTGCATATGACTTTATCTACATA<br/> TCTTTTTAAAATTTTATTAATTTTTTAAATGAAGGATTATTG<br/> CTTACAGAATTTTGTCTGTGTCAGACCTCAACTACATTAT<br/> ATCTTGATGCTATTTACTTGCAACATTTTCAGCAATATTG<br/> TGTCTGACCCTAGTCAATAAATACACAAAGCACCTGCTTTTT<br/> ATTTATTATATTTTGGTGCCATTAAGTAACTAGGTAATTAAGAAT<br/> AGTGCATGGCTAGAGAGAAGCCTTCCTGGTGGCTCAGTGGT<br/> AAAGAATTCACCTACCAATGCAGAAGATGCAGGTTTGATCCC<br/> TGAGTTAGGAAGATCCCGTGGAGAATGAAATGGCAACCCACT<br/> CCATTATTCTGCTGGGAATTCATGGACAGAGGAGTCCCT<br/> GTGGGTACAGTCCACGGGGTCCGAGAGTCAAATACGACTGA<br/> GTGACTGAACAACGAAACAACATAGGTAGGGATTGCTTT<br/> GGTTATTGACTGTTAGAAAACCTGGTGAATTTTTATGCTTTA</p> |
| MSTRG.225063.2 | 0.13 | 0 | 9.47E-06 | -5.51 | down | <p>CGCGTCTTCCCTGGTCAACGAGCCTGCGCATGAAGGAGGCGTG<br/> CCCGGGGCCCCAGCAGAGGCCTGAGGAGGGCGCGATGGTC<br/> CCCGGCCCACTCTCGAGGGGCTCTCGGCGGGGCTGGGTTG<br/> GCGCCGTTACGCAGAGCCCGCTCCTCGGGGACCGCCCTTGG<br/> CCGTTTCTCCCGCGCCTGCGCGCGCCTCTGATCGGGCCAT<br/> CCCCCTACGATCGCACACGCATGGCGCCAGCCTCCTATCTC<br/> TTGTTACGTGCCAGGGCCGGGCGGGGGCTTCCCCGTTGTC<br/> TCCGAGCACCGCCACCTCTCCCGCCCCAGGGTCCGCCTGCGT<br/> AGCTGGTCTGCCTTTTTCTGCTTTCCTTCCTGCTTACCGCT<br/> CTGCTGCTAGTCCCTCAGGGGGCGGTCCTTGGGCGTGGAGGG<br/> CCTCCCCACAGACATCTCCTTTTTGGTAAAGGGCCACTCCAG<br/> TACTCTTGCTGGAAAATCCCATGGACAGAGGAGCCTGGTAG<br/> GCTGCAGTCCATGGGGTCGCTAAGAGTCGGGCACGACTGAGC<br/> GACTTCCCTTTCACCTTTCACCTTTCATGCATTGGAGAAGGAA<br/> ATGGCAACCCACTCCAGTGTGTTGCTGGAGAATCCCAGGG<br/> ACAGAGGAGCCTAGTGGGCTGCTGTCTATGGGGTACACAGA<br/> GTCGGACAAGACTGAAGCGACTTAGGAGCAGCAGAGGGCGT<br/> CTTCTTGAGTCTTTTAGGCCCTCCTTGGCCATAAAAATGAA<br/> GCGTCAAGGGACGGGTCTGTCTTAGAAAACAGCAAATGCACT<br/> GGTTTTAGTGTGGCGATGTGAAAGTACTGGGTTTGTGTAAG<br/> TGAAGCTTATGCTTCCCTGAGTGAAGTGTGCTGTTGGAGAAG<br/> ACTCTTGAGAGTCCCTTGGATTGCAGGGAGATCCAGCCAGTC<br/> CATCCTAAAGGAAATCAGTCCCTGAATATTCATTGGAAGGACT<br/> GATGCTGAAGCTGAAACTCCAATACTTTGGCTACCTGATGCA<br/> AAGAAGTACTTATTGAAAAGACCCTGATGCTGGGAAAGAT</p>      |

|                |      |      |         |       |      |                                                                                                                                                                                                                                                                                                                                                                                                                                                                                                                                                                                                                                                                                                                                                                                                                                                                                                                                                                                                                                                                                                                                                                                                                                     |
|----------------|------|------|---------|-------|------|-------------------------------------------------------------------------------------------------------------------------------------------------------------------------------------------------------------------------------------------------------------------------------------------------------------------------------------------------------------------------------------------------------------------------------------------------------------------------------------------------------------------------------------------------------------------------------------------------------------------------------------------------------------------------------------------------------------------------------------------------------------------------------------------------------------------------------------------------------------------------------------------------------------------------------------------------------------------------------------------------------------------------------------------------------------------------------------------------------------------------------------------------------------------------------------------------------------------------------------|
| MSTRG.198735.7 | 1.92 | 0.04 | 0.00573 | -5.59 | down | <p>CCCGCTTTGGGCTGCATTCCCAAGCAACCCGTCTCCGGGAAG<br/> ACCCGGGCCCGGCGCGCCGGGGCCGCCATCGGCCTCACACC<br/> GTCCACGGGCTGGGCCTCGATCAGAAGGACTTGGGCCCCCGG<br/> TATTTAGCCTTAGATGGAGTTTACCACCCGCTTTGGGCTGCA<br/> TTCCCAAGCAACCCGACTCCGGAAGACCCGGGCCCGGCGCG<br/> CCGGGGCCGCTACCGCCTCACACCGTCCACGGGCTGGGCC<br/> TCGATCAGAAGGACTTGGGCCCCACGAGCGGCGCCGGGGA<br/> GTGGGTCTTCCAAGCAACCCGACTCCGGGAAGACCCGGGCC<br/> GGCGCGCCGGGGCCGCTACCGCCTCACACCGTCCACGGGC<br/> TGGGCCTCGATCAGAAGGACTTGGGCCCCACGAGCGGCGC<br/> CGGGGAGTGGGTCTCCGTACGCCACATG</p>                                                                                                                                                                                                                                                                                                                                                                                                                                                                                                                                                                                                                                                                                                            |
| MSTRG.138309.1 | 1.14 | 0.02 | 0.0019  | -5.84 | down | <p>ACATCTCCAGACTTTGCCATGTGTCTCTTGAGGGCAAATCA<br/> CCCCTGGTTGAAAAGTATCTATAAAACAGGTATAGGGCTT<br/> CCCTAGTGGTCTAGTGGTTAAGAATTTGCCTGTCAATGCAGT<br/> GGGAAGGGAGAAGGCAATGGCACCCACTCCAGTACTCTTG<br/> CCTGAAAATCCCATGGACGGAGGAGCCTGGTAGGCTGCAGT<br/> CCATGGGGTCGAGAAGAGTCCGACACGACTAAGTGACTTCAC<br/> TTTCGCTTTTCACTTTCATGCATTGGAGAAGGAAATGGCAAC<br/> CCACTCCAGTGTCTTGCTGGAGAATCCAGGGACGGGGGA<br/> GCCTGGTGGGCTGCCGTCTCTGGGGTCGCACAGAGTCGGACA<br/> CGACTGAAGCGACTTAGCAGCAGCAGCAACAGCACCAGCAGT<br/> GGGAAGATTCCACATTCCATGCGGCAACTAAGCCCGTGGCG<br/> CACGACTACTGAAGCCCATGTGCCTAGAGCCTGTGCTCCACA<br/> ACAGGAGAAGCGACCACAGTGAGAAACCTGTGCACATCAGCA<br/> AATACCCAGTGCAGCCGCTCAGCTCAAATGGCCCCTCTTGCG<br/> TAAAGCTTACCCCTCCACTGAGATGACCTGGTCACACTCTT<br/> CTCTAAGTGCCAGAAAGCTCTGTACCTGCTACATCCTGCTCA<br/> CAAGGAAGGAAGGACTAACTGCTGCTACCTGTCTGCTCTCCT<br/> TACCCGATGGGGCTTCTGGAGGCAAGGACCCCTGGTGGCA<br/> TCCCAGTGCCTGGCACGTCATGGGACTTTGCACATGGCTGCT<br/> GGGTGAGGAAGCTCCATGGCAGCAGGATGAGGTGCTGGGAA<br/> CAAGCAGGTGAGTGGAAAACAAGGGCTCTATGGAGAAGGAGCT<br/> GGGACATCGTGAGGTTAGGAGCCATGGGCTCTCCTCAGGATG<br/> ACTTCTTCATCATCATCACAGTGGTCCCTCAGGCTGGAACA<br/> AAATACTCAGTGCATCAGAGACTTGAGTTCGACTCAGACAAA<br/> ATTTGTCTAATTTCTAAAAAAGAATACTAAAAAGAAGATGGC</p> |

|                 |      |   |         |       |      |                                                                                                                                                                                                                                                                                                                                                                                                                                                                                                                                                                                                                                                                                                                                                                                                                                                                                                                                                                                                                                                                                                                                                                                                                                             |
|-----------------|------|---|---------|-------|------|---------------------------------------------------------------------------------------------------------------------------------------------------------------------------------------------------------------------------------------------------------------------------------------------------------------------------------------------------------------------------------------------------------------------------------------------------------------------------------------------------------------------------------------------------------------------------------------------------------------------------------------------------------------------------------------------------------------------------------------------------------------------------------------------------------------------------------------------------------------------------------------------------------------------------------------------------------------------------------------------------------------------------------------------------------------------------------------------------------------------------------------------------------------------------------------------------------------------------------------------|
| MSTRG.231934.10 | 0.19 | 0 | 0.00125 | -6.05 | down | <p>TCTGGATATCAGCGTTGCGGCTGGAGGCAGGGCTGGTCCTCA<br/> GCCTGTGTCCACTGCCACCTTGGCCTGCTCTTGGCGCCGGA<br/> ACTCTGTGCCGTCGTTCCCTTTACCATAATTTGGGACGGCC<br/> GGCGTAAGAATTTATGCTATGACCTTCGATTCAGCCAGGAG<br/> GTGACACCAAACCTTGATCAGAAACCATGCCACAGGTGAAGAG<br/> GTATATTGAGCCCTGCCTGGCCAGTGAGGTTACTAGAGAATT<br/> GGAAGAGGCTCAAGTCAGCATCCTGCACATGGTTATCAAACC<br/> ATTGTGAAGTCTTAGTAAGTGTACCTGGGATACTTGTTAAA<br/> AATGCAGATTCTTGGGCAGCTAGAAAACCTTGTCACTGGTCAA<br/> GAGCAACAAGTAACAAGACCTACTTGTCACTTATCCTGAGGC<br/> ATCGTGCCAGTGGGTTTACCAGCAAACCAGAATAAAGCATC<br/> ATTGCCCTGGATGTCCTTGTGAGATGGTTGGGAAGTCTTGGC<br/> TGAAGTGTGGAGAATATCTTTGAAAAGTGTTTTAGAGAGTCT<br/> ACCAGATTGGCCATGTGAGTGCCTGTGCAGCAGAAGAGTGGG<br/> TCTTCTCAGTGGTTAAGGTAACAAAGTGATTAAGGTAAGTGA<br/> AGGAGGAAAGATTGACATTGTCTTGACTCCTATTAGGGAGGC<br/> TTGTAGGAATGTCATTTCTAGGGGCCAGTAATTTAAAGCCT<br/> GTAGTTTATTCTACAATATATCCTTCTCAAAAACAGTTGGGGT<br/> AGGTTATATGCTTACCCAGTCTGAGATCACCCCTGCAGAGGA<br/> TCAGAAGAATTGAAATGGTTCCTAAGTAAACTAGGTGGCATA<br/> AGCTGCATGTCATAAATAATCTCAGCATGCACTGATTACAGT<br/> CCCTTTGGTGAGAGTCTATTCTTTCAAACCAGACTTATTGAG<br/> AGTTTTCTTTATCAGCCTATGGAGCTGCATACATCTTGTC<br/> AAAGCCAGCTCATTAGCAGAAGCTTATTATTTAAGCAGCAGA<br/> CAAGAATATAACACTTTGAATTAGTAATTTAGAGGTAGCAG</p> |
| MSTRG.142554.5  | 0.14 | 0 | 0.0014  | -6.15 | down | <p>GAGTCCACCTGCGTCCGGCCGCGGTGCGCCGAGCGCGCGCG<br/> GCGAAGCGACGGGGCTCCCGGAGCCGTGGCGCCGGCCCGG<br/> CTGCGGGGAGGGCGTGTGCCTTGGCCGCCCCCGCCCGGGT<br/> GAGATTCAGTTTGGAAAACGCGAGGATTTCCCGCCCCCCCC<br/> CCCCAATTCGTGATGTGGGCTTAGGGTTACTTTTCGTATTGA<br/> CTTAGGAAAGCACGTGCTCTCAAACCTGGCTTTTGGCCTTTC<br/> CCTGTCATCGTCAGTGATTCCCTGTCATCGTAAATGATGCGT<br/> GGCCGAAGCGACTGAAATGTTTTAAAGCCGGATGCGCCCAG<br/> GATGATGTAGTCATGTCAGTTAAGTGGCTTTGGGGTATAAT<br/> TTTGTGTGTGTGTAAGGACTTGCAAAAAAATTCCGGCAAGA<br/> GACATGTAATGAATTTATGTAGGATTTAGCGTCAATATTGA<br/> AGTAATCAGATTTAGTGGTTGGCGCAGCCTCGCAAGTAAAT<br/> GGCCCCATTATCTACGAGGTTGAGGTCTTAACTGTTTATTG<br/> AGCGAGTTCTTAGGATCAGCTGACTGCTGATTATAATTAC<br/> ACTAGACGTAGAGGTTGTGTCCTTAGTTGATAAGCAGAGATT<br/> AGAGCTAACATTTAACATTCTACCCCGTAGCAAGTTTCTCT<br/> GCTTCTTTTCGGATCATTCTGTTCAAATTAACCTCAGGTCTG<br/> CCTAGATGAATAGCATTGCTTGGTGCATAACATAATAGCTTT<br/> ATTTCTAGTAGTAACACGTATTAGCTTATATACATTATGTAT<br/> ATATAATCGTGCTCTACAACCTGTTTAGTATGATTCAAAGTT<br/> GGAAAATTAGGAACAGTAATACTGGGCAATGTTGAGTAGTGA<br/> TTGTTTGCCAGACTTGTTCAAATCATCTACACGCTTTATCT<br/> CATTTAATCTTTGGGATAACTTTTTGCATAAACATAGGTTAC<br/> TCTTAAATACTTGAGTACACGAGTTGGATTGAATGTGTCCA<br/> AATGGTGAATATGTACATTAATTGTTTCTGTTTCTGTAAC</p>              |

|                |      |      |          |       |      |                                                                                                                                                                                                                                                                                                                                                                                                                                                                                                                                                                                                                                                                                                                                                                                                                                                                                                                                                                                                                                                                                                                                                                            |
|----------------|------|------|----------|-------|------|----------------------------------------------------------------------------------------------------------------------------------------------------------------------------------------------------------------------------------------------------------------------------------------------------------------------------------------------------------------------------------------------------------------------------------------------------------------------------------------------------------------------------------------------------------------------------------------------------------------------------------------------------------------------------------------------------------------------------------------------------------------------------------------------------------------------------------------------------------------------------------------------------------------------------------------------------------------------------------------------------------------------------------------------------------------------------------------------------------------------------------------------------------------------------|
| MSTRG.133391.3 | 15.5 | 0.16 | 0.00217  | -6.59 | down | CGACGTCGGGGCGTTGGCCCGTGGGGCGTGCCGTGCCCTCG<br>CCCGCTCACCCTTTCCCAGGTACCTAGCGCGTCCCGGCGCG<br>GAGGTTTAAAGACCCCTGGGGGGGGGTGTCGCCCGTCCGCC<br>TTGGGGTTCGGGGCGGTGGGGCCCGGGGAGTAGTCGGGAG<br>CTGCCTCCCGTCTCCCCCAGACCCCGCGTCCCCGAGGGG<br>ACGGGGTGGCGCGCGCGTGCGCGCCACGGTCACTGCCGCC<br>GCGGCCGTGGGAGGGGGCTACCCGACGGCCGTGCGTGTGGG<br>CGTGGCCGTGTGCGGCGGCGGTGCGCGCGCTGCCCGCGTC<br>CCTGGGGGAGGGTTGGGGGCCCGGGCGCGCTGTGGGGTTG<br>TCGAGCCCGCCCTGGCGGCTTGGCGCCGACGCCCCGTCGT<br>GTGGAACCTTTCCCGACCCCTCCGTTCTGCTGTTTTCTGTCT<br>GACTTGGCCGGCCAGTAGTCGGGAGCTGCCTCCCGTCTCCCC<br>CCAGACCCCGCGTCCCCGAGGGGACGGGGTGGCGCGCGGC<br>GTGGCGCGCCACGGTCACTGCCGCCGCGCGCTCGGGAGGGG<br>GCTACCCGACGGCCGTGCGTGTGGCCGTGGCCGTGTGCGGCG<br>GCGCGTGGCGCGCTGCCCGCGTCCCTGGGGGAGGGTTGGG<br>GGCCCCCGGGCGCCTGTGGGGTTGTCCGAGCCCGCCCTGGC<br>GGCTTGGCGCCGACGCCCCGTGCGTGTGGAACCTTTCCCGAC<br>CCCTCCGTTCTGCTGTTTTCTGTCTGACTTGGCCGGCCAGAG<br>GCAACCCCTGCCCAACTCCACCTCCGGGGAGGGAGCGCG                                                                                                                                                                                                                                                 |
| MSTRG.180512.2 | 0.39 | 0    | 3.04E-07 | -7.24 | down | TGCTGTTCTGACCTTTTGCTGAGTTTATTACTGAGCAA<br>ACTGTGGCTTCATGGTGGAGGGGATCCTCGTTGCTGCACTGGCT<br>CCTCTTTAGTTGCGGTGCAGGGGCTTCTCATTGTGATGGAGC<br>AGAGGCTCTAGGGCATGCAGGCTTCAAGTAATTGTGGCCCTTG<br>CGCTCTAGAACACAGGCTCAGTCTTCGTGGCCAGGGGCTTT<br>GCTTCTCCTCAGCATGTGGGGTCTTCCCAGACCAGGGATCAA<br>ACCCTTGTCTCCTGCATTGGTGGGTGGATTCTTATCCACCCA<br>GCCACCAGGAAGCGCCGATGCCAACTGTCTTGAAAGCATTG<br>ATCTGGATCCCAGACTGAAGCAGGTGATGCTGAAACTCCTG<br>AAGGAATCGTGTATCTTGAGCTGCTCAAGTTTATTTCCACT<br>AAAAATACACCCTGAAACTGGGGCACAATGAAGGATTTCTGA<br>CAATGGGGAAGAGGAATAAATAAAACTCTGGGGCCTTCTG<br>ATTCTTCACTGAGTCACCTCCAAATACTCACCAGTGAGCTGA<br>GCTTGGACCCTCTCCACTCGTCACTGTCATCAGTAAAAGCTC<br>AGGCAGTCCGTGTGGTCTGGGAGCTTAAAAGTCTCGAAGCTT<br>GTGAGTCATTGTTAGGAGAGGCCCTGATGGAAGTGAACCT<br>GCATCTACCAGGGAGGAAAAGAAAGAACTAGAGGGGAAGTGA<br>CTTGGTCTGCACCATTCGGATGAGTGTGCTGGAGTGGGACT<br>TAGAGCCTGCACCGCCTCCTCATTTCACCACCCCACTCCC<br>CAGTCTTCCCAAGCCCCCGCCTGCACCAGCACCTGTGTCT<br>GCCGTTCTGTGGCACATCTTAAGGCAGCCTAGGCATGCCAG<br>GGGGCGGTCAATGAGAGAATCCTCAGTTAGCAATAAAGAATG<br>CTTTCAGCTTCAGGTTACAGAAAACCAGATCAATGGCAGCTC<br>AACTGTAAGGACATTAGTGTGACTCATTGAGACTAGGGAGG<br>GAGGTAGCCCCAAGCTGAGACCACTGACTCAGCCATGTCAAG |

|                 |      |   |          |       |      |                                                                                                                                                                                                                                                                                                                                                                                                                                                                                                                                                                                                                                                                                                                                                                                                                                                                                                                                                                                                                                                                                                                                                                                                                                            |
|-----------------|------|---|----------|-------|------|--------------------------------------------------------------------------------------------------------------------------------------------------------------------------------------------------------------------------------------------------------------------------------------------------------------------------------------------------------------------------------------------------------------------------------------------------------------------------------------------------------------------------------------------------------------------------------------------------------------------------------------------------------------------------------------------------------------------------------------------------------------------------------------------------------------------------------------------------------------------------------------------------------------------------------------------------------------------------------------------------------------------------------------------------------------------------------------------------------------------------------------------------------------------------------------------------------------------------------------------|
| MSTRG.183083.10 | 0.23 | 0 | 8.02E-07 | -8.57 | down | <p>CTGCGGGAGAGTAGTAAACTCGGGGCCGGAGGCCCTGGTGAG<br/> AAATGAGGACACCCGGGAGCCAGGGACGTTAAAGCTGCCGCA<br/> AGGATATAACAGGAGGACCTGGGGAGTCGGCTGGATGGGGTA<br/> CTGGAGCCGGAGGCAGGAACAGCTTGGCGGTGCAGGTTCCCC<br/> CGCTTCCCCTGCTTTCAAAAGGCTGAGAAGCCGGAAGGCTGAG<br/> GAACTTCTCGAGGCTCTTCGCAGCTCCAGCTCACAGATGCCG<br/> CGGATGAGTTCTGCCTCAGTATCATCAGCTGTGGCCCCACCC<br/> AGCCCCATCTCCTCCTAAGGTGACTCAGACTTTGAATTC<br/> TGATGGGAAAGCAGCCAGGGATCATGGGTGAGCAGACAGTTT<br/> TGATTCCAGCCTACCCTTCATTTACATGAATGGATCTGGGG<br/> AAGGGCAAATTCGCAAAGCTCTTCACAGGCTTGTACAGTGT<br/> ATCTGAAGAGCAAAGCCTCATGAATTAATAGGAAAAGTACT<br/> AAATCCCCTCCATTTGTGTCTAAAGTGGCCAAAGCATCCCAC<br/> ATCTCTTCCGATTATCCTCATAGCAGCATATAAACTTCCTGA<br/> ACAAAATAAATCGATGGAACCTGCCAGACAACGGCTCAAGGT<br/> CACAGAGAAGGACTCGGGCGCCGACAGAGCTCTCCGCTCACAG<br/> CCTGCTCCAGGTGCACCAGCTGCTGCAGAGCCACGTCCCCGG<br/> CCAGGGACAGCAGGTTTCATCAACAGGAAGGGCCTGCTTCGCA<br/> CAGTCTGCAGTATCCGGGCGCAGATCACCTCGGGGCCCTCA<br/> GCCAGCTGGTAGATGAGGGCCACAGCCGCTCCTTGAACGGG<br/> ACCCAGAGCGGGTCTGGGTGGATGCTGCCTGCACAGGAAGAG<br/> GGGAAGCTGCCACCACAGACAGAGGAGCCCTTCTGCCCCAG<br/> GCTCTGCGCGCAGCTCACCTTTCGTGACCATCTCACGCAGC<br/> CGCTCAAACAGGCGGTGCTCCTGGGGCAGCCGGAAGGGAGGG<br/> TGACGTTCCGCCATAGAAGGCTGTTAAGGGCAGGGAAGACAA</p> |
| MSTRG.43629.32  | 1.23 | 0 | 2.45E-07 | -8.61 | down | <p>TGGCAGTGTGCACACCCCCAGCCCCTAAGCACTCTGCAAGGA<br/> CGCCTGGCTCCTAGGTCCGAAGGGAAGGCGAGAGCTGAGCTG<br/> AGGACCCAGTCAGGTCTCCACACTCCCGCAGCCTGCTCCTT<br/> CCCGGGCGGAACGCTAGAAGCTGGGCAGGGCTTGGGGAGGC<br/> TCGCCCAGCACAGAGCAGCCTCTCGGCCGGGGCTCTGTGCTA<br/> TCGCGCCTGGGCGCAGAGCTGGAGCTCCGCCGGTGTGGAAGC<br/> TCACTCGGTCCATCCCAGTACAGGCTTGAAGCACCCGCCGG<br/> CAGCCAGCCTCTCTCCCAGGTTCCGGGCATTGGGCTCCAA<br/> ACCTGGGACCAAAGTACTGCCCGGAGCTCACTGATCA</p>                                                                                                                                                                                                                                                                                                                                                                                                                                                                                                                                                                                                                                                                                                                                                                                                    |

|                |      |   |          |       |      |                                                                                                                                                                                                                                                                                                                                                                                                                                                                                                                                                                                                                                                                                                                                                                                                                                                                                                                                                                                                                                                                                                                                                                                                                                                  |
|----------------|------|---|----------|-------|------|--------------------------------------------------------------------------------------------------------------------------------------------------------------------------------------------------------------------------------------------------------------------------------------------------------------------------------------------------------------------------------------------------------------------------------------------------------------------------------------------------------------------------------------------------------------------------------------------------------------------------------------------------------------------------------------------------------------------------------------------------------------------------------------------------------------------------------------------------------------------------------------------------------------------------------------------------------------------------------------------------------------------------------------------------------------------------------------------------------------------------------------------------------------------------------------------------------------------------------------------------|
| MSTRG.234381.1 | 2.16 | 0 | 2.30E-06 | -9.26 | down | <p>TTTTCAGTGAGTCAGCTCTTTGCATCAGGTGGCCAAAGTATT<br/> GGAGTTTCAGCTTCAGCATCAGTCCTTACCAATGAATATTCA<br/> GGACTGTAAAGAACAACCTTACTTAATCATTATCAGTATATG<br/> AAAGTTCTGGATATTGTCGCCAATGCTTAATATTGTCAGTGT<br/> TTAATTTTAGCCATCTGGCTGTTGTTCTGTAGTACCTTACTG<br/> TGGTTTTTATTTCCATTTTTTCTAATGAGTTGGAATCCTTTT<br/> TATATGTTTTTTGGTCATGTGGATGTTAGCTTTTGTAAAGGAG<br/> CCTGTTCTAATCTCATACTTATTTTTCTTTTTTATTGATTT<br/> GTATTTCTTTATTTTGTGTCTGAAAATGACCATTTTTACATG<br/> TTCATTATATGTATTAACATTTTCAGGATATATATTTTATACA<br/> AGCCTAGAATTTGAAGGCCAGAGACCCGTAAGAATATATCG<br/> TCCAGTCTCTTATTAATAGCTTAATGTGAAACTGAGACCTAT<br/> AGAGATAGTCATTTGCTCAAACCCTCTTCTAGTTAGTAGAAA<br/> GATCAGAAATAAAACCAGAAAATAGTCTCTGAATCCTGACAGT<br/> AATGACCTTCCCTATTAACATGGAGAGTCTTTAGTCCTTT<br/> CTAATATGGTAACTGAGACTCTGTCTGTCTGGGAAGGCCAAG<br/> CAATGGAATGCATGACATAGTTATTGTTAATAGCAAATACAG<br/> TGTGATATATGATTAATCTCATTGATTCTCTGGACAAAAATA<br/> TCCTCAACTAATCAACTGTTTTATAGCATGATGATACAAAAT<br/> TTCAACGTGTATTTTTCTTTTGGTCTTAGCTTTATTGTTTTT<br/> TCTTTTCCATAGCTTTATTGTTGCATTCAACTTTTCATATTT<br/> ATTCCATTACTCCTATCTTCTCATTCAACATTTGGTTCAAAT<br/> TCAAGATAATCCATTTTTTTCTATAGCAGATTAGTAAGAATG<br/> TTAACTTGTTACTATTGTCATGAAATAGAGCAAAGTTAGGTT<br/> ACCAGACATCCTTGCTAATAGAATAACGATGCCTACTATATA</p> |
| MSTRG.36282.7  | 0.19 | 0 | 5.34E-06 | -9.32 | down | <p>GTAGCAGTAGCAGCTTTTTGCTTTAGTTAGCATCCCTAAAAT<br/> CTGCACCTGGTAAAAGGATATTCTTTTAAATGGCTCCTTGTG<br/> GATTACATTTAAGCTAATTAATAATTTCTTTCTTCCCCCTG<br/> TTTTTATTATTGCTTGTGTCAAGTGCCCTTCTTCTTAAAGCA<br/> AAACAATTTGTAAATCTGGAATGAGTTATATATCTTTGTT<br/> ACATTTTCACTTAGATGCTCTTTGAAAGAACAGATGTGGCGG<br/> CAAGTTACTTTCTCAGATTCTGTTACTGGTTCAAACATCAT<br/> GGTTCTTAATTTAGAAAAGTTGCATCTGATGATCAAAGAAAAG<br/> TCAGAAATCTGTAGGTTTTTGTAGGGGATTGTGTGTTTCTC<br/> ATTGTCCTTATTTTAAAATTCTTGATCTTTATTTCTCAATTT<br/> CCTGTATCTAACTGGGTTAATGTCTTTTAAATGATTGTAGA<br/> GAACAATCCTAGAGATAAGAGAAAGAAAAGCTATTACTGAA<br/> TGCCTCTGAGTGTGTGTGTGCTCAGTCATGTCTGATTCTTTG<br/> CGATCCCATGGACTGTAGTCCCCAGGCTCCTCTGTCCATGG<br/> AATTTTCCAGCGAGAAATTTGGAGTGGGTTGCCATTTCCCTT<br/> CTCTAGGGGATCTTTCTACCCAGGGATGGAACCCGCATCTC<br/> TAACATCTCCTGCATTGGCAGGCAGATTCTTTACCACTAAGC<br/> CTCCTGGGAAGCCACTGGCTGCCTAGTTTTAGGCAGATTCTA<br/> TGAAAACCTACACGGTTTCATTTAATTTGCCCTATGCTCCCT<br/> TTTTAATGCACAAATAAAGAAAAGGAAGCCAGAGAGGTTT<br/> AGTTTGTCTCCAGAGGTCTGCGAGCTGGTAATTTGCAGAGCT<br/> CATTTTGAATCAAAGTTTATCTGACTATAAACCCAGATTAC<br/> TTTATGAAGACAGCTCCTGTTTTTATGCTGTGGCTTTAAAAT<br/> CTAAACCGTAGCTATCTAAAATTAACACAGTTTTTTTTGAGCC<br/> TTGAATCCAATAAGAATACAACCTTTTATGAAATAATTTCTG</p>          |

|                |      |   |          |       |      |                                                                                                                                                                                                                                                                                                                                                                                                                                                                                                                                                                                                                                                                                                                                                                                                                                                                                                                                                                                                                                                                                                                                                                                    |
|----------------|------|---|----------|-------|------|------------------------------------------------------------------------------------------------------------------------------------------------------------------------------------------------------------------------------------------------------------------------------------------------------------------------------------------------------------------------------------------------------------------------------------------------------------------------------------------------------------------------------------------------------------------------------------------------------------------------------------------------------------------------------------------------------------------------------------------------------------------------------------------------------------------------------------------------------------------------------------------------------------------------------------------------------------------------------------------------------------------------------------------------------------------------------------------------------------------------------------------------------------------------------------|
| MSTRG.148408.2 | 0.33 | 0 | 4.58E-11 | -11.8 | down | GGTCGGACGCGCCCGCAGCGGGCGAAGAGAGCGAAGTGGACA<br>AGGCCGCCATGTTAGGGGTGCTGGAAAGATTCCGCGGAGCCC<br>GCTGAGGTTTTAGGGAACCGGGAGCCGAGTGGTGGTGCAGA<br>GGGACAGTGAGGAGGAGGATAAGTCGGTTGAATCTGTCTTC<br>ACTATGAAAAGATGAGAAAATTTCTTTCTCTCTGAGGGTGTG<br>GGAAGGTCTTAAAAGGCTGATATATTAGTGCTGTTTTTCTCC<br>TTCCTTTTGCATATTATCCTGAAAACATAACATCACTTTGG<br>GTCAGTAGGGGTATGCACTTCACTTGTAGGAGTTAAAATTA<br>TAGCTGATAAGTGGATTACTGTATCAAGGAAAAGACTAGGCAG<br>AGTGATTATAAATGACAAAAACATGGTCAAAAACATTTCTCAG<br>ATGTATGCAGATGATAATTACAGAAATAGTTTATAAAGAAT<br>GATCTTACATATTGTCATGTTTCTAGGAACAAGTCAGATGAA<br>TGGCTTTCATTTTTAAACAGAGGTAGTATGTGTTGGTCTCAG<br>TTATGCATGGAGCTTATGGAATTATTTGTTACTCAGAAATAC<br>CTTCTTTACAAGTAATGTTGGTAAGTATAGGAAAAGGAACAA<br>AATGTGTACTGTTTTCTTTGTGATCTGTGTTTCTTCGTATAA<br>CTATAGACATGTTTTAACCTTAAGAGAGACAAAATAGACTGA<br>ACAGATTTACATTTAGGCTTTCTTCAAACCTACATAAAATTA<br>TTTTAGGGGTGGTGATTCATGGGTGTTGTTGTGTCTCATA<br>TGAACTTATCTTGTTCATTTTGAAGAGACTCCTTTATATAA<br>GCAATAACCTCCTCAATTTGAGTTACTATAAAAAAAAAAATTT<br>GTTGGGGCGGGGAACCCAGCAGATTTCTCAAAAACATTGT<br>ATGAGAGAAATGAGACCTGTATAATATAGTGATTTCTGTAAT<br>TTGCCATGTGTTGGGTAGTTAGAAATTTTTTTCAGACTTTT<br>ATCTAATGGGCATCAAGCCATAAAGAAATGAAATCTAGTTAC |
| MSTRG.12156.2  | 0.97 | 0 | 6.81E-11 | -11.8 | down | TCCCCCGGAAACCCCGGCTCCAGAAGAGCGCGCGGGGAGG<br>GCACCGGCCGTTACTTCTCCGGCGGGCGCGGAGCGCGG<br>TGCAGCCACAGCCCGGATCGCCCCGATCGTCGCGAGCCGGCC<br>CGCCGTCCCCGGCCCCGCCAGGCCTCCCGGATCTCCCGGGGA<br>GCGCTCTGCGGCGCCCGCTTCTCTCCCGGGGAACCCAGGAAC<br>TGAGTTGGGACGCAGGTGGCGCCCCGGATCCCCAGGGCGCAG<br>CCGAGGTCCAGGCAGGTGGCGACTATTCGTGGGATTCTGGG<br>GTCGCGGTCCAGGATCAGTCCGCTTGGGGTTCTTATCCCC<br>GTGTCGAGTGGCTTTGGGGTAGGTGGGTGGGCGGCGAGCAG<br>GGTTCGGGTGGGCCCGCCGTGACGCGGAGCCGGCTCCG<br>AACTTGGGCCGCGGGGCTGGGGTCGCCGAGGCGGCTGGGGC<br>GCGCAAGGCGCGCCGCTCGTTTCACTTGTCTTTGTTTTAAA<br>AGGAAACGCAGGCGTGAAGGCGGGGTGGCTCCTGCCGGTGG<br>GCGCCCGGCGAACCTGATTTCCGCTGGGGGCTTGGGGACGC<br>GCGAGAAGGTGTCTGAGGGCCCTGGCGCGCCCTGGTTTGCC<br>GGTGACTTACCGAGGGCGCCGGGCCGCAAGATCCGGGGC<br>GCCTGAAACACCTGGGGAACCTGCGGCTCCCACCCCGCTCCC<br>CGTCACCTGCGCTGTCGCGTCCGGGGCCCGCCAGGGCGGCA<br>GGCAACGGGGCGCGGGGAGGATCCGGCGGCTCTACCGAGAC<br>CCCCGGGGCTCCCCAGGACCTCTGCATTCCGGGCCCTTGATG<br>CTGGGAGGTGAATGTGGGGACAGTGTGCGAAATGGGGTTATG<br>GGTGCACAAGACTGCCTCTAATTTCCGGATCTTACAGCATTT<br>TGGACGAAGGGTAACAGCGTTTGTGCGTATATGTTTTTTTT<br>TTTTTCCAAGCACTCGAGACTTTTTTATTGGCCTGTATTCA<br>CTGTACGGTATCCTAAAATAGTATTTGACCTGCAGTTATT                     |



|                |      |      |          |       |      |                                                                                                                                                                                                                                                                                                                                                  |
|----------------|------|------|----------|-------|------|--------------------------------------------------------------------------------------------------------------------------------------------------------------------------------------------------------------------------------------------------------------------------------------------------------------------------------------------------|
| MSTRG.16757.11 | #### | 12.6 | 2.42E-07 | -12.5 | down | TTTTTCATCGCCGGGCGCGGTGGCGCGCCTGTAGTCCCAGC<br>TACTCGGGAGGCTGAGGCTGGAGGATCGCTTGAGCTCAGGAG<br>TTCTGGGCTGCAGTGCCTATGCCGATCGGGTGTCCGACTA<br>AGTTCGGCATCAATATGGTGACCTCCCGGAGCGGGGACCA<br>CCAGGTTGCCTAAGGAGGGGTGAACCGGCCAGGTCGGAAAC<br>GGAGCAGGTCAAAACTCCCGTGCTGATCAGTAGTGGGATCGC<br>GCCTGTGAATAGCCACTGTACTCCAGCCTGGGCAACATAGCG<br>AGACCCCGTCTCTTTGAGTT |
|----------------|------|------|----------|-------|------|--------------------------------------------------------------------------------------------------------------------------------------------------------------------------------------------------------------------------------------------------------------------------------------------------------------------------------------------------|

Table S2. Significantly enriched GO terms.

| #GO_classify1      | GO_classify2                                       | All gene | DE gene |
|--------------------|----------------------------------------------------|----------|---------|
| #Total_gene        |                                                    | 21276    | 157     |
| cellular component | extracellular region                               | 4233     | 23      |
| cellular component | cell                                               | 17944    | 144     |
| cellular component | nucleoid                                           | 41       | 1       |
| cellular component | membrane                                           | 10248    | 62      |
| cellular component | virion                                             | 12       | 0       |
| cellular component | cell junction                                      | 1440     | 10      |
| cellular component | membrane-enclosed lumen                            | 2698     | 38      |
| cellular component | macromolecular complex                             | 5663     | 61      |
| cellular component | organelle                                          | 13348    | 126     |
| cellular component | other organism                                     | 6        | 0       |
| cellular component | other organism part                                | 6        | 0       |
| cellular component | extracellular region part                          | 3171     | 19      |
| cellular component | organelle part                                     | 8111     | 81      |
| cellular component | virion part                                        | 9        | 0       |
| cellular component | membrane part                                      | 7250     | 37      |
| cellular component | synapse part                                       | 383      | 2       |
| cellular component | cell part                                          | 17944    | 144     |
| cellular component | synapse                                            | 558      | 3       |
| cellular component | supramolecular complex                             | 760      | 8       |
| molecular function | transcription factor activity, protein binding     | 414      | 4       |
| molecular function | nucleic acid binding transcription factor activity | 916      | 13      |
| molecular function | catalytic activity                                 | 8106     | 56      |
| molecular function | signal transducer activity                         | 2564     | 8       |
| molecular function | structural molecule activity                       | 616      | 8       |
| molecular function | transporter activity                               | 1691     | 6       |
| molecular function | binding                                            | 14457    | 128     |
| molecular function | electron carrier activity                          | 154      | 1       |
| molecular function | morphogen activity                                 | 4        | 0       |
| molecular function | antioxidant activity                               | 71       | 1       |
| molecular function | metallochaperone activity                          | 5        | 0       |
| molecular function | protein tag                                        | 3        | 0       |
| molecular function | chemoattractant activity                           | 42       | 0       |
| molecular function | translation regulator activity                     | 25       | 0       |
| molecular function | chemorepellent activity                            | 5        | 0       |
| molecular function | molecular transducer activity                      | 2504     | 5       |
| molecular function | molecular function regulator                       | 980      | 9       |
| biological process | reproduction                                       | 1341     | 11      |
| biological process | cell killing                                       | 48       | 0       |
| biological process | immune system process                              | 2261     | 25      |
| biological process | behavior                                           | 572      | 5       |
| biological process | metabolic process                                  | 11762    | 88      |
| biological process | cellular process                                   | 17219    | 129     |
| biological process | reproductive process                               | 1275     | 11      |
| biological process | biological adhesion                                | 1570     | 5       |
| biological process | signaling                                          | 6550     | 37      |
| biological process | multicellular organismal process                   | 10758    | 80      |
| biological process | developmental process                              | 8186     | 80      |
| biological process | growth                                             | 392      | 8       |

|                    |                                                        |       |     |
|--------------------|--------------------------------------------------------|-------|-----|
| biological process | locomotion                                             | 1382  | 10  |
| biological process | single-organism process                                | 15641 | 121 |
| biological process | biological phase                                       | 34    | 0   |
| biological process | rhythmic process                                       | 166   | 0   |
| biological process | response to stimulus                                   | 10538 | 82  |
| biological process | localization                                           | 6912  | 45  |
| biological process | multi-organism process                                 | 1682  | 16  |
| biological process | biological regulation                                  | 14451 | 109 |
| biological process | cellular component organization or biogenesis          | 6170  | 56  |
| biological process | cell aggregation                                       | 20    | 1   |
| biological process | detoxification                                         | 84    | 1   |
| biological process | presynaptic process involved in chemical synaptic tran | 53    | 2   |



Table S3. Significantly enriched KEGG.

| #KEGG_n                                                |         | KEGG_N |
|--------------------------------------------------------|---------|--------|
| Spliceosome                                            | ko03040 | 4      |
| SNARE interactions in vesicular transport              | ko04130 | 2      |
| Ribosome biogenesis in eukaryotes                      | ko03008 | 3      |
| Ras signaling pathway                                  | ko04014 | 4      |
| RIG-I-like receptor signaling pathway                  | ko04622 | 3      |
| Primary bile acid biosynthesis                         | ko00120 | 1      |
| One carbon pool by folate                              | ko00670 | 1      |
| Nucleotide excision repair                             | ko03420 | 2      |
| Measles                                                | ko05162 | 4      |
| Longevity regulating pathway - multiple species        | ko04213 | 2      |
| Legionellosis                                          | ko05134 | 3      |
| Influenza A                                            | ko05164 | 3      |
| Hypertrophic cardiomyopathy (HCM)                      | ko05410 | 2      |
| Epstein-Barr virus infection                           | ko05169 | 5      |
| Endocytosis                                            | ko04144 | 4      |
| DNA replication                                        | ko03030 | 2      |
| Complement and coagulation cascades                    | ko04610 | 2      |
| Arrhythmogenic right ventricular cardiomyopathy (ARVC) | ko05412 | 2      |
| Antigen processing and presentation                    | ko04612 | 3      |
| Aminoacyl-tRNA biosynthesis                            | ko00970 | 2      |

Table S4. LncRNA-miRNA co-expression network.

| gene_name | gene_log2FC  | gene_regulated | lncRNA_name     | lncRNA_log2FC | lncRNA_regulated |
|-----------|--------------|----------------|-----------------|---------------|------------------|
| IGF1R     | 0.481573148  | up             | MSTRG.128763.1  | -0.782306327  | down             |
|           |              |                | MSTRG.13578.1   | -1.407501398  | down             |
|           |              |                | MSTRG.137849.6  | -1.176385269  | down             |
|           |              |                | MSTRG.100266.1  | -1.235290401  | down             |
|           |              |                | MSTRG.103991.1  | -1.089861162  | down             |
|           |              |                | MSTRG.12482.1   | -0.66492613   | down             |
|           |              |                | MSTRG.120825.1  | -0.334559953  | down             |
|           |              |                | MSTRG.117221.1  | -0.932416378  | down             |
|           |              |                | MSTRG.108092.1  | 1.182532533   | up               |
| IRS1      | -0.463087677 | down           | MSTRG.108579.2  | -0.285494922  | down             |
|           |              |                | MSTRG.133330.1  | 0.11465383    | up               |
|           |              |                | MSTRG.137860.1  | 0.770134252   | up               |
|           |              |                | MSTRG.106118.1  | 1.115603831   | up               |
|           |              |                | MSTRG.113577.13 | -0.498159706  | down             |
|           |              |                | MSTRG.117494.6  | 0.926473667   | up               |
|           |              |                | MSTRG.12205.2   | 0.375688612   | up               |
|           |              |                | MSTRG.122434.1  | 0.328846168   | up               |
|           |              |                | MSTRG.125445.3  | -0.323133452  | down             |
|           |              |                | MSTRG.133282.1  | 1.026545002   | up               |
|           |              |                | MSTRG.133279.1  | 0.480801455   | up               |
|           |              |                | MSTRG.131525.1  | 0.205516541   | up               |
|           |              |                | MSTRG.128161.5  | 0.354207201   | up               |
|           |              |                | MSTRG.102914.4  | -0.083138298  | down             |
|           |              |                | MSTRG.103314.1  | -0.60974236   | down             |
| AKT1      | 0.130986577  | up             | MSTRG.104185.1  | -0.00725758   | down             |
|           |              |                | MSTRG.105346.1  | 1.048259926   | up               |
|           |              |                | MSTRG.107702.19 | -0.779822599  | down             |
|           |              |                | MSTRG.111347.19 | 1.260568359   | up               |
|           |              |                | MSTRG.113751.1  | -0.429326947  | down             |
|           |              |                | MSTRG.120618.45 | -2.172799702  | down             |
|           |              |                | MSTRG.12205.1   | 1.227420304   | up               |
|           |              |                | MSTRG.117686.3  | -0.811084015  | down             |
|           |              |                | MSTRG.119102.2  | -1.095434619  | down             |
| PIK3R1    | 0.14623156   | up             | MSTRG.134401.1  | 0.314609974   | up               |
|           |              |                | MSTRG.103177.1  | 0.270976279   | up               |
|           |              |                | MSTRG.120824.1  | 0.972039436   | up               |
|           |              |                | MSTRG.123964.1  | -1.016894197  | down             |
|           |              |                | MSTRG.128131.1  | 1.514764023   | up               |
| MTOR      | 0.370152329  | up             | MSTRG.133381.13 | 3.398279559   | up               |
|           |              |                | MSTRG.13401.1   | -1.384289876  | down             |
|           |              |                | MSTRG.10286.2   | -2.296876105  | down             |
|           |              |                | MSTRG.108811.1  | -1.695849876  | down             |
|           |              |                | MSTRG.116750.1  | 1.160655598   | up               |
|           |              |                | MSTRG.117744.2  | 10.00030544   | up               |
|           |              |                | MSTRG.108560.5  | -2.136835727  | down             |
|           |              |                | MSTRG.110124.7  | 2.928086144   | up               |
|           |              |                | FOXO1           | -0.892254044  | down             |

|            |              |      |                 |              |      |
|------------|--------------|------|-----------------|--------------|------|
|            |              |      | MSTRG.111545.1  | -0.696918911 | down |
| GSK3A      | 0.10592042   | up   | MSTRG.102914.1  | 0.695194772  | up   |
|            |              |      | MSTRG.106618.1  | -0.323118096 | down |
|            |              |      | MSTRG.111044.3  | -1.423666078 | down |
|            |              |      | MSTRG.117892.3  | -1.352206727 | down |
|            |              |      | MSTRG.133055.1  | 1.518355214  | up   |
|            |              |      | MSTRG.133381.12 | -1.581109074 | down |
|            |              |      | MSTRG.134631.1  | -0.509101392 | down |
|            |              |      | MSTRG.136192.1  | 0.619506817  | up   |
|            |              |      | MSTRG.136197.1  | -1.308633625 | down |
| GSK3B      | -0.227301843 | down | MSTRG.139409.1  | 0.02971043   | up   |
|            |              |      | MSTRG.101877.1  | 0.079334886  | up   |
|            |              |      | MSTRG.103771.1  | -0.023973242 | down |
|            |              |      | MSTRG.111347.14 | 1.340697835  | up   |
| NF-kappa B | 0.125113106  | up   | MSTRG.105299.1  | 0.764673497  | up   |
|            |              |      | MSTRG.109472.1  | 0.588752099  | up   |
|            |              |      | MSTRG.129991.1  | 1.060896867  | up   |
|            |              |      | MSTRG.133086.11 | -0.935614266 | down |

**Table S5. Primers used for qPCR**

| <b>primers name</b> | <b>sequence (5'-3')</b>  |
|---------------------|--------------------------|
| GAPDH F             | ACATACTCAGCACCCAGCATCAC  |
| GAPDH R             | ATTCTGGCAAAGTGGACATCG    |
| MSTRG.111347.2 F    | GTGGGTGGGTGCAAGTGATA     |
| MSTRG.111347.2 R    | TTGTGCCTTCCAGTTCTCCC     |
| MSTRG.119476.4 F    | CAGAGGATGAGATGGTTGGATGGC |
| MSTRG.119476.4 R    | TCAGTTCAGTCGCTCAGTTGTGTC |
| MSTRG.143209.3 F    | CCTCTTCCGTGATCTCTTCTAGG  |
| MSTRG.143209.3 R    | GTAGGATCACACAAGTCACCGT   |
| MSTRG.14510.5 F     | TGCATATGAAAACCACCCTCCA   |
| MSTRG.14510.5 R     | TCCAGTCACCCGAGTAGCAT     |
| MSTRG.129912.5 F    | GTGTGGAACGCAGGCTCAGTAG   |
| MSTRG.129912.5 R    | GGTGGTCCAGTGGTTAAGAATCCG |
| MSTRG.133982.9 F    | GTTTGGTGAGTGAGTCCTGGG    |
| MSTRG.133982.9 R    | GTGCTTGGCTCCGAATCCT      |
| MSTRG.167273.1 F    | TTCAGTTGCGCGTATCAGATCCAG |
| MSTRG.167273.1 R    | TCCAGTGGCTAGAACTCTGTGCTC |
| MSTRG.205178.3 F    | ATTCAGGCTGCCTCTTGTGTTGG  |
| MSTRG.205178.3 R    | CTGGAGAGGAACATTGGCTTCTGG |
| MSTRG.100266.1 F    | TAATGTCAGGGTGGCTGGAAG    |
| MSTRG.100266.1 R    | CAGTCTCCTTCCTCTCTTGCC    |
| MSTRG.103991.1 F    | TTGGATAATGTGGGGCGAGG     |
| MSTRG.103991.1 R    | ACGTGACCCCAGCTAAACAC     |
| MSTRG.119236.1 F    | GAATACACAGTTCGAGACGGGA   |
| MSTRG.119236.1 R    | GGCTGTCACTTTCTCCCCAC     |
